# Supplementary material for: TNF-α differentially regulates cell cycle genes in promyelocytic and granulocytic HL-60/S4 cells
Source: bioRxiv preprint, doi:10.1101/471789, version 2 (2019-05-15)
Supplement: Supplementary figure 1 [file 471789_file09.docx]

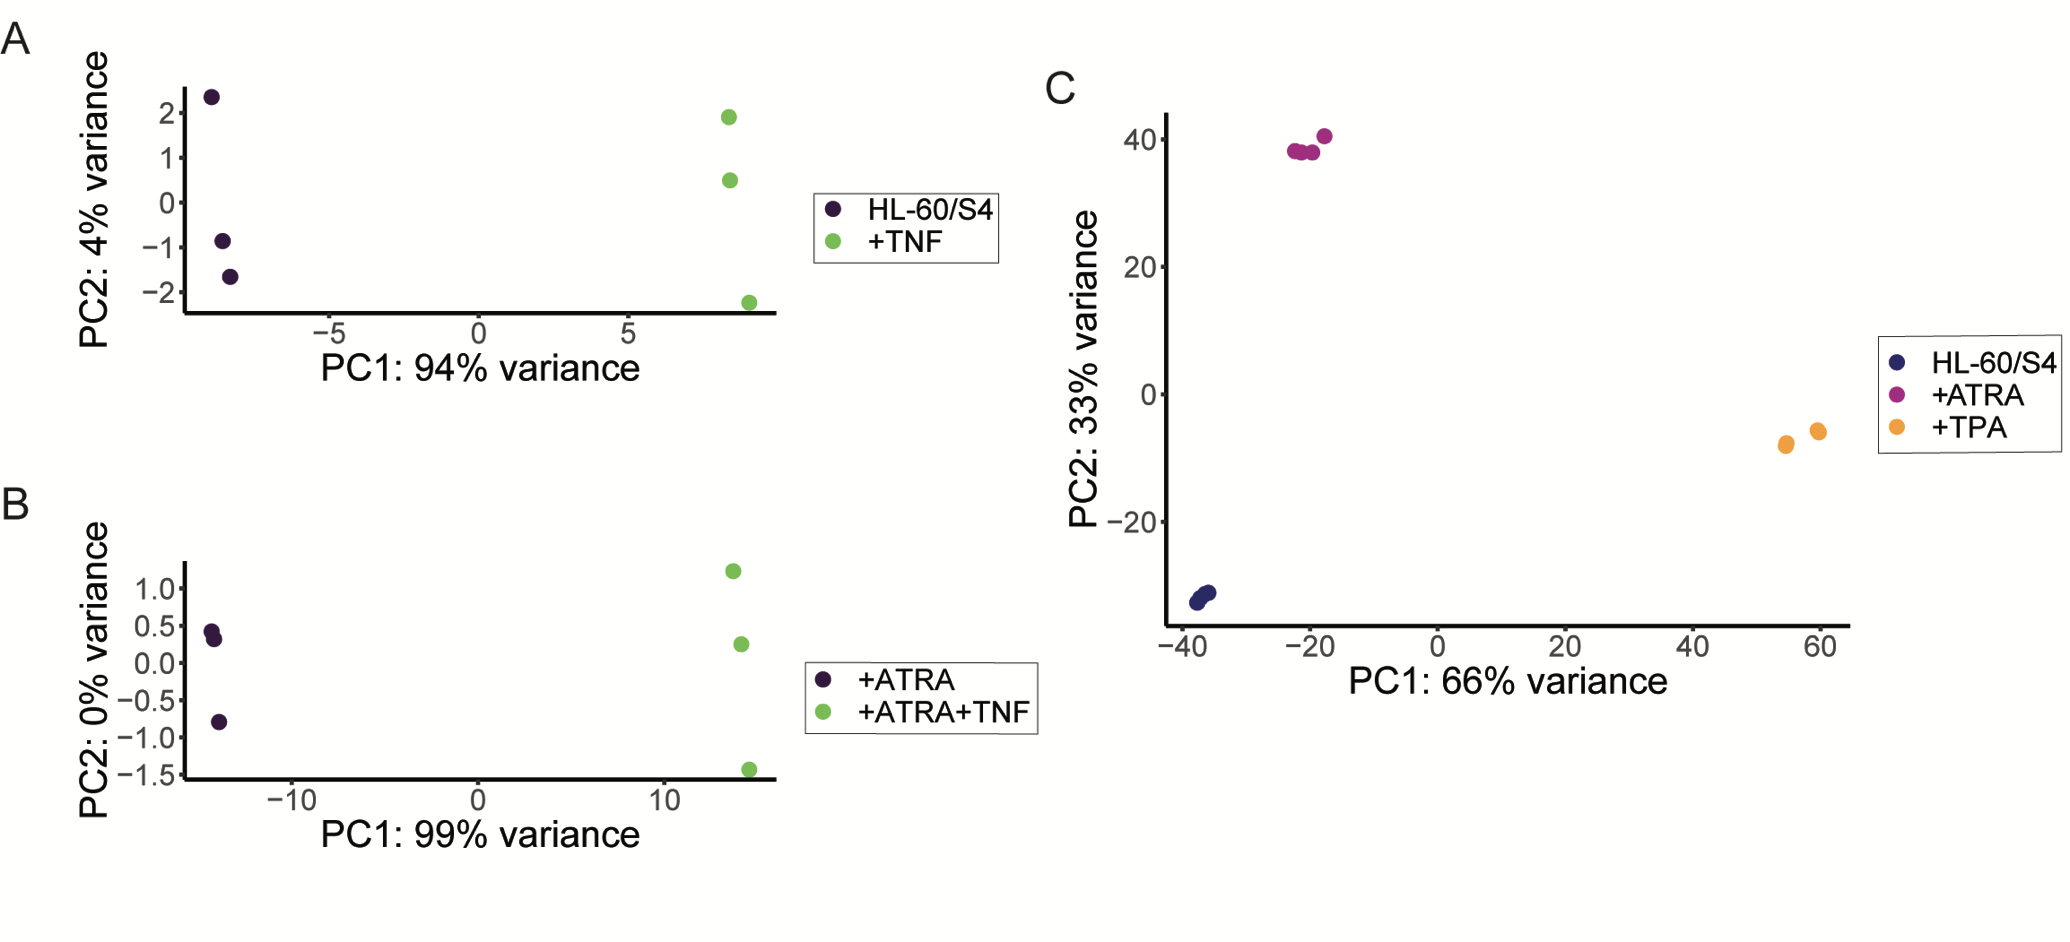


Supplementary Figure 1. Principle component analysis (PCA) of variance stabilised transcripts in HL60/S4 cells with A) TNF-α treatment for two hours; B) ATRA-differentiation for four days, then TNF-α treatment for two hours; C) Differentiation with ATRA, TPA, or vehicle for four days.
