# Supplementary material for: TNF-α differentially regulates cell cycle genes in promyelocytic and granulocytic HL-60/S4 cells
Source: bioRxiv preprint, doi:10.1101/471789, version 2 (2019-05-15)
Supplement: Supplementary tables 1-22 [file 471789_file08.xlsx]

## Sheet: ST1
Supplementary table 1. Significantly differentially expressed genes in promyelocytes treated with TNF-a, differentiated into granulocytes and macrophages, and granulocytes treated with TNF-a. The ensembl gene ID (ens_gene) and gene name (external_gene_name) identify the gene. The mean expression level (baseMean), log2 fold change, log2 fold chance standard error, and FDR adjusted p-value are show…
ens_gene	external_gene_name	baseMean_proTNF	log2FoldChange_proTNF	lfcSE_proTNF	padj_proTNF	baseMean_granTNF	log2FoldChange_granTNF	lfcSE_granTNF	padj_granTNF	baseMean_ATRA	log2FoldChange_ATRA	lfcSE_ATRA	padj_ATRA	baseMean_TPA	log2FoldChange_TPA	lfcSE_TPA	padj_TPA	TNF_Category	Diff_category
ENSG00000227232	WASH7P	438.688	0.0689048	0.117418	0.768196	657.108	0.134372	0.0867706	0.24458	1151.29	0.403967	0.144282	0.0139288	960.488	-0.055795	0.148766	0.786427	NA	ATRA-specific
ENSG00000268903	AL627309.7	34.2606	0.318734	0.363198	0.64271	240.815	0.444675	0.142227	0.0067658	406.281	2.44631	0.198488	1.93864e-33	382.416	2.36521	0.168961	4.19424e-43	Gran-specific TNF	Conserved diff
ENSG00000269981	AL627309.8	24.3003	0.336891	0.460907	0.706712	224.338	0.70537	0.140321	3.44794e-06	509.602	2.62934	0.268115	1.81476e-21	409.6	2.281	0.264604	6.28393e-17	Gran-specific TNF	Conserved diff
ENSG00000241860	AL627309.5	50.504	0.210775	0.282823	0.699983	126.39	0.712404	0.183866	0.000524797	153.45	1.87584	0.386137	5.97566e-06	107.414	1.219	0.45354	0.0164652	Gran-specific TNF	Conserved diff
ENSG00000228463	AP006222.1	76.0086	1.01415	0.233101	0.000207706	65.4484	0.182934	0.248074	0.635026	113.126	0.215178	0.172633	0.335009	142.556	0.819873	0.196696	0.000107083	Pro-specific TNF	TPA-specific
ENSG00000237094	AL732372.2	256.197	0.405611	0.136846	0.0226793	619.462	0.312385	0.0888238	0.00190811	814.597	1.59062	0.693368	0.0500906	702.83	1.33089	0.719985	0.114942	Conserved TNF	NA
ENSG00000250575	AL732372.3	96.6819	0.259933	0.208975	0.473327	177.995	0.581866	0.168194	0.00232267	340.924	1.0882	0.227739	8.7258e-06	498.487	1.86124	0.219845	2.31618e-16	Gran-specific TNF	Conserved diff
ENSG00000230021	AL669831.3	77.4601	0.137086	0.259474	0.792738	66.3069	0.482254	0.251045	0.130948	65.3727	0.30052	0.439113	0.630089	92.1585	1.13281	0.432776	0.0198727	NA	TPA-specific
ENSG00000225972	MTND1P23	360.702	-0.271323	0.430148	0.751044	257.332	0.913668	0.140803	9.04408e-10	1081.38	-0.0651084	0.193707	0.826784	1209.29	0.277622	0.210763	0.28282	Gran-specific TNF	NA
ENSG00000225630	MTND2P28	26793.3	-0.243229	0.171212	0.391803	18206.3	0.456624	0.0620695	2.41282e-12	70841.1	0.276282	0.246914	0.396253	73627.1	0.411076	0.249981	0.166854	Gran-specific TNF	NA
ENSG00000237973	MTCO1P12	7282.67	0.0765922	0.165857	0.820101	9580.57	0.214613	0.0513935	0.000159825	81274.1	0.503506	0.083012	9.1664e-09	68760.8	0.0995018	0.108263	0.472402	Gran-specific TNF	ATRA-specific
ENSG00000229344	MTCO2P12	212.518	-0.0797094	0.511745	0.943971	174.291	0.723739	0.190274	0.000684283	321.763	0.16819	0.302542	0.703099	298.473	-0.0120803	0.277131	0.977223	Gran-specific TNF	NA
ENSG00000198744	MTCO3P12	204.626	-0.0617381	0.629882	0.96658	165.982	0.922935	0.187234	5.54325e-06	1194.35	0.135414	0.319373	0.780059	860.863	-0.921262	0.315179	0.00847669	Gran-specific TNF	TPA-specific
ENSG00000228327	AL669831.1	960.027	0.0829724	0.0935223	0.638673	898.158	0.254438	0.0797889	0.00559229	2110.15	0.563773	0.322594	0.153137	2423.65	0.917131	0.327119	0.011929	Gran-specific TNF	TPA-specific
ENSG00000237491	AL669831.5	259.876	0.180465	0.132805	0.418017	201.144	-0.0415577	0.141887	0.867159	249.633	-0.952132	0.294572	0.00382647	279.031	-0.471881	0.380505	0.315466	NA	ATRA-specific
ENSG00000230092	AL669831.4	95.5098	0.101781	0.222461	0.82203	195.737	0.0442836	0.141036	0.856211	58.741	0.55542	0.257541	0.0681191	64.9014	0.82809	0.291624	0.0107772	NA	TPA-specific
ENSG00000228794	LINC01128	493.169	0.0706773	0.10048	0.719044	156.897	0.084528	0.158655	0.745591	554.677	-0.846096	0.114148	1.20996e-12	1377.68	1.54305	0.125271	1.40345e-33	NA	Opposite diff
ENSG00000225880	LINC00115	108.192	0.156757	0.202087	0.685675	127.261	0.18837	0.174775	0.455296	111.534	-0.812987	0.192156	9.76565e-05	107.31	-0.916533	0.210972	5.10156e-05	NA	Conserved diff
ENSG00000188976	NOC2L	8220.52	-0.139537	0.0621793	0.114241	2934.21	0.0477146	0.0517124	0.534079	14829.8	-1.16113	0.144434	1.02769e-14	15166.3	-1.00711	0.189366	4.86468e-07	NA	Conserved diff
ENSG00000187961	KLHL17	203.9	0.0868462	0.155851	0.780842	245.034	0.449645	0.127485	0.00184452	1548.79	-0.365188	0.10985	0.00284001	1613.7	-0.193948	0.121527	0.181391	Gran-specific TNF	ATRA-specific
ENSG00000187608	ISG15	268.069	-0.125754	0.135691	0.619947	378.737	-0.206698	0.115495	0.165706	4190.73	2.96295	0.332497	7.04023e-18	3791.33	2.81545	0.350732	8.33169e-15	NA	Conserved diff
ENSG00000188157	AGRN	340.609	0.404044	0.13137	0.0166561	1191.48	0.896013	0.0766351	4.1466e-30	2862.25	1.11906	0.171226	4.96784e-10	13487.8	3.82221	0.171555	6.45188e-108	Conserved TNF	Conserved diff
ENSG00000131591	C1orf159	820.715	0.254346	0.0910404	0.0349728	523.495	0.798022	0.0928539	1.43373e-16	1341.73	-0.603025	0.111209	3.45834e-07	1544.23	-0.100726	0.124684	0.533913	Conserved TNF	ATRA-specific
ENSG00000186827	TNFRSF4	36.5039	3.18799	0.422428	1.83676e-12	151.718	5.17313	0.310671	1.6858e-60	41.0534	-2.44579	0.442421	1.96095e-07	933.075	4.72582	0.292326	3.37243e-57	Conserved TNF	Opposite diff
ENSG00000078808	SDF4	3152.22	-0.0669276	0.0681676	0.593869	2959.07	0.444161	0.0577675	2.06329e-13	8142.47	-0.0385203	0.160316	0.880135	11107.2	0.785526	0.210319	0.000581527	Gran-specific TNF	TPA-specific
ENSG00000176022	B3GALT6	733.319	0.0571198	0.110963	0.798335	625.314	0.70307	0.0971504	5.71173e-12	2164.31	-0.912727	0.225721	0.000209111	2624.99	-0.188245	0.264966	0.589141	Gran-specific TNF	ATRA-specific
ENSG00000160087	UBE2J2	1921.52	0.0498522	0.0757791	0.7401	1455.44	0.350969	0.0623306	1.50253e-07	3448.57	-0.466062	0.193987	0.038807	3611.01	-0.276382	0.220196	0.308881	Gran-specific TNF	ATRA-specific
ENSG00000131584	ACAP3	587.354	-0.193803	0.110397	0.255325	655.859	0.494181	0.0834643	2.89718e-08	4247.23	-1.21159	0.128741	7.59172e-20	5186.39	-0.375508	0.132872	0.0112016	Gran-specific TNF	Conserved diff
ENSG00000169972	PUSL1	677.212	-0.107846	0.0953783	0.525394	317.542	0.36934	0.111365	0.0037298	912.086	-1.11707	0.209007	5.21883e-07	984.941	-0.747727	0.243786	0.00550881	Gran-specific TNF	Conserved diff
ENSG00000127054	INTS11	1946.91	0.0127963	0.0732498	0.937869	1245.92	0.205296	0.066804	0.00798121	7247.42	-0.504435	0.103844	5.98464e-06	7377.31	-0.402047	0.140618	0.0101803	Gran-specific TNF	Conserved diff
ENSG00000240731	AL139287.1	63.5013	-0.165224	0.26919	0.758298	38.8074	0.165738	0.313391	0.747532	244.523	-0.401058	0.166662	0.038458	244.71	-0.35217	0.199327	0.134102	NA	ATRA-specific
ENSG00000224051	CPTP	279.527	-0.377151	0.137949	0.0405469	413.679	0.205715	0.107501	0.1327	892.722	0.157684	0.140684	0.395183	1178.95	0.868827	0.193472	2.69942e-05	Pro-specific TNF	TPA-specific
ENSG00000107404	DVL1	1307.75	-0.072143	0.0863778	0.660164	478.128	0.263151	0.0972294	0.0223596	2784.85	-1.266	0.124495	5.11444e-23	3594.71	-0.235132	0.178908	0.284099	Gran-specific TNF	ATRA-specific
ENSG00000175756	AURKAIP1	2476.44	-0.101689	0.0850532	0.496058	1243.58	0.0559751	0.0759154	0.635056	4069.03	-0.838234	0.276714	0.00718606	4496.41	-0.431729	0.307365	0.247503	NA	ATRA-specific
ENSG00000221978	CCNL2	2605.26	0.155892	0.0609405	0.0607995	3097.42	0.418067	0.0538285	1.13999e-13	10861.3	0.211881	0.0996848	0.0728367	10141.6	0.0582563	0.129998	0.743312	Gran-specific TNF	NA
ENSG00000242485	MRPL20	2355.21	0.0629608	0.0830879	0.694337	1260.11	0.294475	0.0705898	0.000162503	4556.04	-0.568876	0.270704	0.076721	4495.77	-0.578652	0.285063	0.0798026	Gran-specific TNF	NA
ENSG00000272455	AL391244.3	146.987	0.242073	0.17041	0.391803	54.0724	0.0861969	0.27047	0.853633	407.546	-1.29793	0.17208	4.61775e-13	411.299	-1.1968	0.181291	2.51486e-10	NA	Conserved diff
ENSG00000160072	ATAD3B	2608.96	0.0567744	0.0741594	0.690883	848.534	0.520664	0.081663	1.85312e-09	3341.03	-1.39029	0.164821	4.13529e-16	3266.91	-1.44544	0.174997	1.28296e-15	Gran-specific TNF	Conserved diff
ENSG00000284740	AL645728.2	28.9827	0.277627	0.369183	0.697063	6.20483	0.610549	0.77171	0.606255	39.1973	-1.25877	0.331584	0.00054108	38.245	-1.32912	0.351339	0.000486404	NA	Conserved diff
ENSG00000197785	ATAD3A	4450.19	-0.169045	0.0700768	0.0823702	914.4	0.080982	0.0814573	0.497566	7163.64	-1.89885	0.182238	3.93488e-24	7539.56	-1.51414	0.220314	4.14031e-11	NA	Conserved diff
ENSG00000160075	SSU72	3192.48	0.00889995	0.0698425	0.953194	2166.74	0.0850158	0.0532596	0.22776	8474.47	-0.636152	0.219343	0.0104943	9139.59	-0.33624	0.248564	0.267908	NA	ATRA-specific
ENSG00000215014	AL645728.1	59.5126	0.0288594	0.269622	0.962314	64.94	0.272192	0.24468	0.437197	100.628	0.755473	0.229133	0.00310759	111.193	0.999889	0.240301	0.000110332	NA	Conserved diff
ENSG00000228594	FNDC10	146.316	-0.179328	0.187007	0.605786	170.618	-0.117029	0.188221	0.696132	870.366	-0.55807	0.21453	0.0237017	1142.23	0.296339	0.269672	0.380812	NA	ATRA-specific
ENSG00000272106	AL691432.2	58.9138	0.00485519	0.274849	0.994115	54.7526	0.348476	0.278512	0.369437	168.068	-0.5795	0.164469	0.00145123	200.186	0.0184162	0.175	0.94248	NA	ATRA-specific
ENSG00000197530	MIB2	284.758	-0.103013	0.146758	0.7198	375.944	0.251808	0.104064	0.0454149	1874.08	-0.620576	0.152479	0.000188683	2266.33	0.0289169	0.161471	0.903217	Gran-specific TNF	ATRA-specific
ENSG00000248333	CDK11B	1736.1	0.0895344	0.0742143	0.490355	1147.33	0.160711	0.0668127	0.047	3960.25	-0.309972	0.12261	0.02855	3999.35	-0.24071	0.149973	0.178547	Gran-specific TNF	ATRA-specific
ENSG00000189339	SLC35E2B	1803.91	-0.0545878	0.0769598	0.716659	2647.74	-0.321993	0.0548577	3.90209e-08	9382.03	0.612822	0.166342	0.00081799	9216.53	0.602222	0.174698	0.00162114	Gran-specific TNF	Conserved diff
ENSG00000215790	SLC35E2	231.986	-0.0405202	0.141221	0.891796	347.984	-0.476369	0.110296	8.81508e-05	896.627	0.589382	0.292244	0.0915049	831.49	0.438998	0.294263	0.215441	Gran-specific TNF	NA
ENSG00000008130	NADK	1920.26	-0.0406142	0.0668943	0.761195	3248.45	0.225619	0.0502979	4.28655e-05	10929.7	1.15406	0.132404	3.86161e-17	8272.37	0.556212	0.16371	0.00191832	Gran-specific TNF	Conserved diff
ENSG00000078369	GNB1	9275.78	0.0070595	0.0536955	0.952252	12179.9	0.326736	0.0461654	1.74296e-11	26769.6	0.799553	0.126577	1.98757e-09	25566.2	0.721735	0.180101	0.000205071	Gran-specific TNF	Conserved diff
ENSG00000067606	PRKCZ	25.0408	-0.730499	0.409878	0.245871	46.0708	-1.00185	0.293097	0.00266614	114.111	0.979648	0.182887	4.90072e-07	61.386	-0.714286	0.273775	0.0203137	Gran-specific TNF	Opposite diff
ENSG00000157933	SKI	1470.64	-0.572295	0.0810011	5.87588e-11	1228.64	-0.486775	0.0785284	5.49283e-09	2909.86	-0.127464	0.144111	0.517241	5629.11	1.4617	0.172289	1.99206e-16	Conserved TNF	TPA-specific
ENSG00000157881	PANK4	702.127	0.0357032	0.0944716	0.853618	723.395	0.338908	0.0904823	0.000849209	1329.56	0.0437223	0.111601	0.796553	1479.72	0.365465	0.144996	0.0255556	Gran-specific TNF	TPA-specific
ENSG00000157873	TNFRSF14	47.8253	0.0639797	0.320365	0.92719	861.769	0.107981	0.0736693	0.276841	2511.41	2.01845	0.156306	1.23693e-36	3981.18	2.82903	0.161564	5.85051e-67	NA	Conserved diff
ENSG00000157870	FAM213B	433.478	-0.371173	0.109283	0.00657513	120.571	0.591465	0.181636	0.00452586	1216.02	-1.93569	0.123401	9.6478e-54	2145.47	0.325137	0.179542	0.12336	Opposite TNF	ATRA-specific
ENSG00000162591	MEGF6	410.035	-0.145194	0.115544	0.466754	33.4726	0.0761459	0.390635	0.914887	2438.43	-3.30015	0.163843	3.29094e-88	2442.07	-3.08417	0.171113	6.86235e-71	NA	Conserved diff
ENSG00000158109	TPRG1L	767.944	-0.265743	0.10537	0.0654928	878.966	-0.240749	0.0774326	0.00714216	2332.07	0.436487	0.17914	0.0357899	2869.87	0.947852	0.223013	7.61021e-05	Gran-specific TNF	Conserved diff
ENSG00000130764	LRRC47	2115.58	-0.171053	0.0683758	0.0682827	1090.86	-0.109531	0.070382	0.24193	4188.9	-0.463712	0.138875	0.0027067	3994.94	-0.589285	0.179834	0.00286076	NA	Conserved diff
ENSG00000116198	CEP104	1220.15	-0.0559865	0.0747311	0.697771	1309.08	-0.193	0.0683937	0.016397	2732.11	0.331654	0.135612	0.0350112	2580.65	0.215741	0.146574	0.222347	Gran-specific TNF	ATRA-specific
ENSG00000169598	DFFB	436.479	-0.372649	0.128506	0.0269602	238.922	-0.751203	0.131804	1.03127e-07	1018.82	-0.582106	0.110454	7.70199e-07	859.413	-1.23411	0.134342	4.28955e-19	Conserved TNF	Conserved diff
ENSG00000198912	C1orf174	1157.82	-0.0447578	0.0793475	0.77746	564.649	-0.0185096	0.0924423	0.912208	2021.66	-0.308608	0.133396	0.0478619	1699.37	-0.896487	0.155552	4.25185e-08	NA	Conserved diff
ENSG00000131697	NPHP4	1442.31	-0.232209	0.0717386	0.0106631	711.605	0.0102658	0.0822034	0.945772	2103.67	-0.583257	0.124313	1.30421e-05	1879.03	-0.974057	0.135088	3.95281e-12	Pro-specific TNF	Conserved diff
ENSG00000069424	KCNAB2	17146.5	-0.188648	0.0578782	0.010003	10026	-0.125347	0.0536122	0.0548262	29926.3	-0.544275	0.0739935	1.82623e-12	34708.6	-0.0294465	0.152052	0.894587	Pro-specific TNF	ATRA-specific
ENSG00000116254	CHD5	89.7061	0.412486	0.234499	0.254049	43.9053	0.315381	0.295982	0.46127	164.682	-1.01963	0.203991	3.03274e-06	176.816	-0.673859	0.237421	0.0108153	NA	Conserved diff
ENSG00000116251	RPL22	19833.1	-0.0297214	0.0538161	0.783369	15398.9	0.187752	0.0441325	0.00011543	76599.7	-0.472854	0.261657	0.137488	62495.8	-1.25553	0.27999	2.77852e-05	Gran-specific TNF	TPA-specific
ENSG00000226944	AL031847.1	29.4998	-0.410005	0.402816	0.577851	7.55028	-0.428791	0.737714	0.71859	54.1562	-2.03605	0.315632	8.57727e-10	53.8292	-1.97865	0.356637	1.41574e-07	NA	Conserved diff
ENSG00000158286	RNF207	308.958	-0.355433	0.126804	0.0342158	109.052	0.133197	0.189761	0.654219	756.503	-1.60405	0.214243	6.96806e-13	730.666	-1.72851	0.251116	3.85707e-11	Pro-specific TNF	Conserved diff
ENSG00000116237	ICMT	3668.53	-0.133233	0.0651005	0.1623	1746.91	-0.256671	0.0583843	6.34058e-05	5507.91	-0.4416	0.123786	0.00124367	6127.29	-0.0654988	0.170721	0.781568	Gran-specific TNF	ATRA-specific
ENSG00000097021	ACOT7	2077.47	-0.20021	0.0782419	0.0607167	644.95	0.238784	0.0905695	0.0268068	3200.1	-1.64213	0.191287	1.18583e-16	2964.24	-2.07722	0.248482	5.63027e-16	Gran-specific TNF	Conserved diff
ENSG00000162408	NOL9	3743.26	-0.09609	0.0638884	0.354824	1774.09	-0.00192478	0.0662202	0.987259	2167.21	-0.381077	0.0985654	0.000415759	1912.93	-0.784475	0.111404	1.29842e-11	NA	Conserved diff
ENSG00000204859	ZBTB48	1074.16	-0.268404	0.0840386	0.0120251	2061.08	-0.0452734	0.0632708	0.647049	4142.94	0.509588	0.140784	0.00103373	3558.28	0.146418	0.149025	0.439488	Pro-specific TNF	ATRA-specific
ENSG00000162413	KLHL21	1340.45	-0.614335	0.0797726	5.77765e-13	803.259	-0.325173	0.0784884	0.000182494	3630.4	-0.195164	0.13255	0.242732	3435.37	-0.329641	0.161029	0.0769199	Conserved TNF	NA
ENSG00000116273	PHF13	414.644	-0.193158	0.106886	0.237419	359.882	0.952599	0.113352	7.10513e-16	1267.44	-0.359925	0.138329	0.023674	1572.72	0.303531	0.180088	0.155192	Gran-specific TNF	ATRA-specific
ENSG00000041988	THAP3	321.864	-0.10122	0.134264	0.69624	246.139	0.0543895	0.135206	0.812315	697.834	-0.552804	0.236744	0.0455508	720.502	-0.405282	0.261243	0.195399	NA	ATRA-specific
ENSG00000007923	DNAJC11	3522.45	0.01404	0.0614937	0.91543	1533.57	-0.00815627	0.0703548	0.950103	3321.82	-0.692254	0.10813	1.16658e-09	3289.26	-0.681597	0.145913	1.1853e-05	NA	Conserved diff
ENSG00000171735	CAMTA1	702.76	0.172656	0.0920263	0.213063	557.012	0.270837	0.0939651	0.0138833	1109.52	-0.363545	0.249589	0.248639	1201.96	-0.0799683	0.265168	0.830083	Gran-specific TNF	NA
ENSG00000049245	VAMP3	1314.26	0.0256291	0.0785387	0.875913	2883.22	0.0657084	0.0541108	0.387307	4403.82	1.34972	0.152678	1.31096e-17	4107.8	1.23182	0.184823	1.6595e-10	NA	Conserved diff
ENSG00000269925	Z98884.2	61.6381	-0.10827	0.261364	0.837156	73.32	0.0876788	0.222261	0.816785	61.4785	1.16253	0.309118	0.000615701	46.614	0.587958	0.404152	0.228735	NA	ATRA-specific
ENSG00000049246	PER3	59.1544	-0.273095	0.30693	0.63759	77.2929	0.200345	0.227196	0.55663	26.8065	2.08223	0.38568	3.91335e-07	48.9976	3.11534	0.310994	1.59707e-22	NA	Conserved diff
ENSG00000049249	TNFRSF9	218.808	4.68334	0.243678	8.10463e-80	2244.81	3.72618	0.0702434	0	823.005	6.18713	0.236147	6.37699e-149	2160.5	7.61317	0.262733	4.25482e-182	Conserved TNF	Conserved diff
ENSG00000116288	PARK7	5678.43	-0.0199773	0.0693398	0.891236	3544.25	0.196013	0.0538546	0.00124375	15320.6	-0.466375	0.244192	0.113198	14111.5	-0.724891	0.26978	0.0164985	Gran-specific TNF	TPA-specific
ENSG00000284747	AL034417.4	130.856	0.415349	0.178126	0.0968751	74.4288	0.873187	0.239569	0.00122151	47.8828	-0.541584	0.23227	0.045891	44.6781	-0.735055	0.284897	0.0219389	Gran-specific TNF	Conserved diff
ENSG00000142599	RERE	1359.61	-0.283295	0.084218	0.00729255	2628.76	-0.827455	0.0665041	5.14295e-34	5085.47	1.40403	0.190998	1.88882e-12	5250.72	1.49365	0.200015	6.10603e-13	Conserved TNF	Conserved diff
ENSG00000074800	ENO1	66515.6	-0.0245587	0.0540278	0.823144	30176.5	0.264299	0.0475317	2.18925e-07	155148	-0.328416	0.210915	0.212182	124226	-1.13597	0.229177	3.05027e-06	Gran-specific TNF	TPA-specific
ENSG00000236269	ENO1-IT1	211.936	-0.0856265	0.148802	0.773278	192.349	0.840555	0.149366	1.52882e-07	36.5161	-0.383905	0.460567	0.546009	31.8114	-0.816097	0.488664	0.159456	Gran-specific TNF	NA
ENSG00000142583	SLC2A5	752.217	-0.0490748	0.0910057	0.788674	17577.3	-0.244128	0.0441744	2.6318e-07	51004.7	5.29611	0.0946968	0	1376.25	-3.31424	0.14931	3.98259e-107	Gran-specific TNF	Opposite diff
ENSG00000180758	GPR157	69.8725	-0.664333	0.242506	0.0400825	333.704	3.41637	0.304154	7.90534e-28	314.39	0.514195	0.164324	0.00528985	658.962	2.05444	0.164041	1.11285e-34	Opposite TNF	Conserved diff
ENSG00000049239	H6PD	464.346	-0.57714	0.104968	8.90794e-07	16767.6	-0.590608	0.0541177	2.57852e-26	18592.7	3.94762	0.158404	8.8699e-135	5932.67	2.10868	0.183075	1.76967e-29	Conserved TNF	Conserved diff
ENSG00000171621	SPSB1	52.378	-0.21082	0.278708	0.694982	184.744	0.684349	0.148951	2.65166e-05	266.301	0.728747	0.136576	5.46002e-07	653.721	2.48635	0.190423	1.27069e-37	Gran-specific TNF	Conserved diff
ENSG00000171612	SLC25A33	1306.16	0.063422	0.0716226	0.639631	639.185	0.0529081	0.0833051	0.688908	2276.07	-0.581407	0.216942	0.0192833	2415.21	-0.340153	0.241343	0.245544	NA	ATRA-specific
ENSG00000188807	TMEM201	2246.84	-0.263127	0.0827546	0.0125083	572.481	-0.0340512	0.100527	0.844006	1833.84	-1.26	0.121097	4.58483e-24	1760.8	-1.40089	0.183468	1.73395e-13	Pro-specific TNF	Conserved diff
ENSG00000171608	PIK3CD	5293.95	0.193349	0.0614375	0.0137612	11721.7	-0.0992265	0.0482055	0.0999813	29797.8	1.76821	0.114516	4.34083e-52	25520.7	1.49694	0.158832	4.78757e-20	Pro-specific TNF	Conserved diff
ENSG00000171603	CLSTN1	2676.91	-0.216888	0.0770147	0.0331303	2483.95	-0.268664	0.0608044	5.75891e-05	7327.67	0.327537	0.11594	0.0129787	8662.28	0.765206	0.175332	4.68112e-05	Conserved TNF	Conserved diff
ENSG00000178585	CTNNBIP1	490.233	-0.321971	0.103399	0.0149991	499.952	-0.409794	0.118716	0.00238247	1873.12	-0.0943363	0.158698	0.681764	1710.1	-0.342712	0.201384	0.150742	Conserved TNF	NA
ENSG00000162441	LZIC	1451.9	-0.0636579	0.0689852	0.62215	851.033	0.0513406	0.0768572	0.672462	1916.41	-0.217007	0.141326	0.219602	1710.97	-0.554342	0.166279	0.00237187	NA	TPA-specific
ENSG00000173614	NMNAT1	310.899	-0.0431163	0.124748	0.86706	482.74	-0.429091	0.11231	0.000641746	1151.03	0.467962	0.143823	0.00357168	1173.69	0.544919	0.163552	0.00238627	Gran-specific TNF	Conserved diff
ENSG00000130939	UBE4B	3353.64	-0.0897682	0.0639835	0.399203	2722.15	-0.260043	0.0554358	1.70812e-05	5413.95	0.25704	0.150535	0.164447	4922.42	0.0308532	0.177195	0.905606	Gran-specific TNF	NA
ENSG00000054523	KIF1B	683.879	-0.0911818	0.0925182	0.592546	1470.23	0.422628	0.0619844	1.03582e-10	2200.06	1.09113	0.186624	3.29828e-08	1995.2	0.908363	0.19271	9.74416e-06	Gran-specific TNF	Conserved diff
ENSG00000142657	PGD	7953.38	-0.122352	0.0595582	0.160374	25748.5	0.158613	0.0508782	0.00695744	54839.7	2.03647	0.143828	6.65671e-44	28526.9	0.75342	0.195103	0.000360952	Gran-specific TNF	Conserved diff
ENSG00000175279	CENPS	105.186	0.32931	0.201803	0.301781	50.553	0.39991	0.313603	0.358217	227.386	-0.798996	0.318696	0.0301012	164.227	-2.75423	0.356183	8.29343e-14	NA	Conserved diff
ENSG00000160049	DFFA	2265.11	-0.08826	0.0665583	0.433148	1189.45	-0.0984427	0.074601	0.338526	3813.67	-0.819057	0.110751	1.36783e-12	4011.68	-0.580138	0.140504	0.000125852	NA	Conserved diff
ENSG00000130940	CASZ1	259.832	-0.174461	0.13318	0.440917	818.251	0.217141	0.0879845	0.0405993	369.997	1.19102	0.189945	2.64672e-09	529.904	1.91245	0.214178	4.28671e-18	Gran-specific TNF	Conserved diff
ENSG00000120948	TARDBP	4346.39	0.131304	0.0595671	0.12308	2553.25	0.0431594	0.055026	0.610379	6868.66	-0.465034	0.174429	0.0200182	5906.05	-1.00023	0.188473	5.15551e-07	NA	Conserved diff
ENSG00000116649	SRM	7110.95	-0.172382	0.081853	0.146762	1046.71	0.0407361	0.0853214	0.775207	6171.72	-2.0663	0.195972	1.09643e-24	6508.68	-1.63812	0.249871	3.39366e-10	NA	Conserved diff
ENSG00000171824	EXOSC10	3360.24	0.0666529	0.0593249	0.528453	2061.33	0.186681	0.0546264	0.0026729	5085.89	-0.274432	0.148459	0.127313	4827.87	-0.40188	0.16909	0.0364495	Gran-specific TNF	TPA-specific
ENSG00000120942	UBIAD1	1925.93	-0.199031	0.0665265	0.021087	496.286	-0.493337	0.0924853	7.27798e-07	2234.83	-1.20502	0.125342	1.14417e-20	2103.23	-1.44812	0.159282	1.0128e-18	Conserved TNF	Conserved diff
ENSG00000116663	FBXO6	37.5088	0.693718	0.375212	0.222161	225.575	0.391705	0.130456	0.00982103	494.636	2.33708	0.226376	1.05934e-23	547.8	2.52871	0.258993	1.90982e-21	Gran-specific TNF	Conserved diff
ENSG00000116670	MAD2L2	1574.89	0.0374744	0.0868183	0.831493	997.595	0.579515	0.0705856	3.45981e-15	3924.57	-0.684711	0.227356	0.00758032	4435.98	-0.2281	0.259207	0.493665	Gran-specific TNF	ATRA-specific
ENSG00000177674	AGTRAP	957.098	-0.244071	0.0972589	0.0673195	1857.04	-0.397729	0.059494	2.51047e-10	3970.41	1.1045	0.137605	1.13517e-14	3815.96	1.04491	0.191657	2.38322e-07	Gran-specific TNF	Conserved diff
ENSG00000177000	MTHFR	739.782	-0.10348	0.0869187	0.497874	1441.02	0.0455702	0.0728006	0.693779	3974.18	1.13498	0.161219	1.7016e-11	4053.06	1.20339	0.160465	4.82356e-13	NA	Conserved diff
ENSG00000011021	CLCN6	716.278	-0.0463879	0.0943888	0.807222	791.187	0.0227773	0.080206	0.871256	3623.07	0.895003	0.218717	0.000172487	2757.6	0.271218	0.220828	0.320631	NA	ATRA-specific
ENSG00000242349	NPPA-AS1	23.6702	0.78508	0.42006	0.215364	20.0967	-0.565109	0.445815	0.361995	62.8567	0.694289	0.231709	0.00793057	37.5647	-0.761039	0.322424	0.0379252	NA	Opposite diff
ENSG00000116685	KIAA2013	1757.53	-0.224413	0.0888551	0.0650307	1529.85	-0.0266022	0.0716379	0.828028	5555.35	0.169984	0.175254	0.472573	6908.63	0.742777	0.224549	0.00258312	NA	TPA-specific
ENSG00000083444	PLOD1	1470.6	-0.19038	0.0763725	0.06971	1817.74	-0.156242	0.0745735	0.0928692	6716.71	1.07645	0.149402	5.36706e-12	7504.22	1.33113	0.186047	5.8661e-12	NA	Conserved diff
ENSG00000116688	MFN2	4594.71	0.0738671	0.0592621	0.472396	3287.27	0.0320274	0.0500802	0.686833	8561.72	0.184976	0.108939	0.167246	9132.1	0.387053	0.170444	0.0467774	NA	TPA-specific
ENSG00000116691	MIIP	1091.41	-0.166374	0.0858992	0.193262	452.151	-0.242649	0.0952408	0.0334191	2679.68	-0.986767	0.233586	0.000100311	2964.95	-0.549537	0.263497	0.0707404	Gran-specific TNF	ATRA-specific
ENSG00000028137	TNFRSF1B	1061.3	-0.452152	0.0908524	1.25043e-05	1885.2	-0.333483	0.0598355	2.0424e-07	6964.62	1.58611	0.143233	3.84094e-27	18610.8	3.29603	0.20472	9.74752e-57	Conserved TNF	Conserved diff
ENSG00000162496	DHRS3	59.4529	1.78316	0.275765	3.12644e-09	6302.74	-0.267081	0.0458993	5.2275e-08	8302.41	8.26885	0.141731	0	79.5528	0.975489	0.26564	0.000731593	Opposite TNF	Conserved diff
ENSG00000116731	PRDM2	1504.25	-0.0187538	0.0750051	0.907263	2215.59	0.157776	0.0611226	0.0307884	2055.81	0.699835	0.177412	0.000307587	2307.93	0.989262	0.190082	8.796e-07	Gran-specific TNF	Conserved diff
ENSG00000142634	EFHD2	5211.83	0.118617	0.0725307	0.300401	13150.8	0.805558	0.0571752	1.84302e-43	18513.8	1.32553	0.174495	3.10414e-13	16916.7	1.16405	0.224227	9.40208e-07	Gran-specific TNF	Conserved diff
ENSG00000132906	CASP9	195.693	-0.195196	0.155751	0.468576	720.251	-0.0533779	0.0807648	0.676146	1450.85	0.91679	0.156714	3.23778e-08	1333.69	0.752752	0.196759	0.000414058	NA	Conserved diff
ENSG00000116138	DNAJC16	1066.38	0.0591807	0.0810176	0.706843	1415.03	-0.0412902	0.0632061	0.680125	1715.86	0.455127	0.136851	0.00282826	1812.49	0.620249	0.143815	5.83964e-05	NA	Conserved diff
ENSG00000197312	DDI2	3407.58	-0.0938135	0.0585772	0.314997	1534.14	-0.236012	0.0719393	0.0041884	3497.32	-0.452796	0.201942	0.0564779	4341.39	0.235182	0.211007	0.372814	Gran-specific TNF	NA
ENSG00000116786	PLEKHM2	1451.42	0.127756	0.0759738	0.282239	1849.16	0.402558	0.0601449	2.38537e-10	5184.48	0.618526	0.1047	2.32598e-08	6635.96	1.19348	0.162208	1.36719e-12	Gran-specific TNF	Conserved diff
ENSG00000233954	UQCRHL	110.816	-0.119893	0.236314	0.801254	67.5883	0.243394	0.246224	0.500689	1668.8	-0.745513	0.285336	0.0230179	1482.95	-1.20591	0.30175	0.000214208	NA	Conserved diff
ENSG00000179743	FLJ37453	55.0672	-0.0923607	0.271312	0.869823	82.8995	0.261341	0.218599	0.396615	212.636	-0.0660568	0.223214	0.849227	180.769	-0.557356	0.240534	0.0419833	NA	TPA-specific
ENSG00000065526	SPEN	7747.14	-0.0351299	0.0752561	0.817592	7561.76	0.436828	0.0578298	5.67622e-13	12633.5	0.134016	0.291387	0.759251	13119.1	0.273504	0.293131	0.465245	Gran-specific TNF	NA
ENSG00000116809	ZBTB17	712.535	0.394032	0.0913377	0.000241456	652.801	0.510612	0.0849845	1.71949e-08	2181.22	-0.14234	0.127787	0.398639	2543.54	0.32096	0.160264	0.0844799	Conserved TNF	NA
ENSG00000142632	ARHGEF19	151.812	-0.0884964	0.176255	0.802632	71.0759	-0.37162	0.260642	0.292835	391.699	-1.20382	0.170617	1.52783e-11	376.862	-1.33687	0.19568	5.45914e-11	NA	Conserved diff
ENSG00000132881	RSG1	81.2649	-0.312524	0.227564	0.411578	81.9848	-0.454103	0.211325	0.0830246	166.809	-0.0823378	0.169714	0.743705	144.351	-0.504132	0.195742	0.0221944	NA	TPA-specific
ENSG00000037637	FBXO42	1241.45	0.0921837	0.0745834	0.477315	1679.39	0.434483	0.0609195	1.19735e-11	2301.65	0.396666	0.0953873	0.000131518	2868.59	0.943441	0.136327	2.99554e-11	Gran-specific TNF	Conserved diff
ENSG00000055070	SZRD1	4353.87	0.00764235	0.0636574	0.956273	4111.38	0.19865	0.05522	0.00144359	7276.07	0.235162	0.118876	0.0990265	8625.89	0.689087	0.179024	0.000378528	Gran-specific TNF	TPA-specific
ENSG00000157191	NECAP2	1744.65	0.494442	0.0773378	4.95346e-09	2278.11	1.05865	0.0612267	3.44222e-65	5026.26	0.754754	0.17859	9.95594e-05	6954.72	1.46537	0.21256	3.59017e-11	Conserved TNF	Conserved diff
ENSG00000226029	LINC01772	79.1536	0.70095	0.249389	0.0335246	84.7182	1.19135	0.221385	5.69376e-07	46.4161	0.24632	0.232857	0.426872	96.888	1.85995	0.228606	3.48913e-15	Conserved TNF	TPA-specific
ENSG00000206652	RNU1-1	133.112	0.357964	0.231232	0.336714	195.248	1.16918	0.186402	3.49449e-09	10.6904	-0.622112	0.612125	0.44817	10.3266	-0.686895	0.701706	0.441239	Gran-specific TNF	NA
ENSG00000219481	NBPF1	1108.31	0.0602166	0.0815448	0.703041	729.368	0.192388	0.0776826	0.0397464	1826.09	-0.774588	0.148679	1.04934e-06	1646.04	-1.16073	0.154691	4.67549e-13	Gran-specific TNF	Conserved diff
ENSG00000215908	CROCCP2	1449.3	-0.0813164	0.0732759	0.535934	1169.37	-0.0717325	0.0793728	0.544572	3522.42	-0.0773533	0.144012	0.713696	3142.29	-0.394499	0.168533	0.0397186	NA	TPA-specific
ENSG00000186301	MST1P2	21.5825	0.12293	0.435219	0.894199	21.4919	-0.335149	0.417963	0.600199	252.07	-0.0826203	0.150088	0.706031	185.745	-1.14922	0.167409	4.3703e-11	NA	TPA-specific
ENSG00000207513	RNU1-3	65.6673	0.185145	0.273192	0.731133	122.626	0.35215	0.178152	0.117816	5.09941	-1.20803	0.830328	0.249356	3.938	-3.0779	1.10402	0.0124728	NA	TPA-specific
ENSG00000236698	EIF1AXP1	88.2781	0.130642	0.225569	0.771136	25.3251	-0.146248	0.408655	0.834858	75.5584	-0.554169	0.192713	0.0112531	70.1404	-0.79167	0.255068	0.00492576	NA	Conserved diff
ENSG00000159363	ATP13A2	540.839	-0.0955119	0.103907	0.623884	1228.82	0.765681	0.0694497	7.69288e-27	1991.31	0.200819	0.0924815	0.0659407	1264.96	-1.38806	0.154119	2.17328e-18	Gran-specific TNF	TPA-specific
ENSG00000117118	SDHB	3197.24	-0.0379745	0.0677018	0.779164	1802.33	-0.0837689	0.06402	0.343544	6581.27	-0.480665	0.247564	0.106364	6093.98	-0.720761	0.270255	0.0174169	NA	TPA-specific
ENSG00000117115	PADI2	64.0923	-0.393368	0.26323	0.35911	155.497	-1.02963	0.159025	9.92283e-10	555.711	1.16544	0.123719	6.99615e-20	301.936	-0.352079	0.161201	0.0569427	Gran-specific TNF	ATRA-specific
ENSG00000179051	RCC2	15204.5	0.129237	0.0616246	0.149057	13524.5	0.249104	0.0444134	1.68873e-07	23017.7	0.0875368	0.0948113	0.496805	20142.9	-0.273377	0.153391	0.130251	Gran-specific TNF	NA
ENSG00000117148	ACTL8	185.401	-0.232924	0.165068	0.395483	20.5618	0.447859	0.421982	0.463675	16.2541	-1.76456	0.40173	4.93262e-05	12.6949	-5.52987	1.06834	1.01553e-06	NA	Conserved diff
ENSG00000159423	ALDH4A1	329.143	-0.0898588	0.122614	0.706003	120.044	-0.45818	0.179478	0.0330436	964.92	-1.11935	0.191435	3.28995e-08	1130.35	-0.453645	0.208269	0.0576916	Gran-specific TNF	ATRA-specific
ENSG00000169991	IFFO2	116.157	0.178227	0.185644	0.605293	13.758	0.617512	0.523427	0.404098	143.011	-2.37939	0.198602	1.24435e-31	410.875	1.30082	0.18408	1.0905e-11	NA	Opposite diff
ENSG00000272084	AL137127.1	47.4458	0.160093	0.293064	0.785991	48.9157	0.347047	0.291555	0.39899	37.6131	0.801386	0.345425	0.0471705	34.2686	0.620542	0.349584	0.132038	NA	ATRA-specific
ENSG00000127481	UBR4	13543.7	0.0641168	0.0698041	0.624227	11625.8	0.301174	0.0524489	8.09543e-08	22274.4	0.171089	0.312474	0.707563	25370.3	0.542643	0.315294	0.145666	Gran-specific TNF	NA
ENSG00000127463	EMC1	3120.77	-0.0783394	0.069256	0.525243	2053.24	0.102176	0.0611208	0.2023	5362.1	-0.214736	0.115775	0.125736	6682.25	0.432852	0.148046	0.00845747	NA	TPA-specific
ENSG00000053372	MRTO4	4467.01	0.0348543	0.0652953	0.790763	886.906	0.147631	0.0731726	0.10839	5308.23	-1.75671	0.205587	1.66257e-16	6988.73	-0.462901	0.237342	0.0939835	NA	ATRA-specific
ENSG00000040487	PQLC2	208.91	0.191974	0.157579	0.485446	1031.52	0.553635	0.0715039	1.36656e-13	1196.62	1.84068	0.142837	1.73264e-36	1398.45	2.14244	0.183478	2.85499e-30	Gran-specific TNF	Conserved diff
ENSG00000077549	CAPZB	4858.68	-0.0372262	0.0572131	0.743276	9859.44	0.11884	0.0468671	0.0344239	19499.7	1.08655	0.17749	6.56305e-09	18063.5	0.946327	0.21995	6.10168e-05	Gran-specific TNF	Conserved diff
ENSG00000173436	MINOS1	495.476	0.274787	0.0996234	0.0382203	569.648	-0.0878472	0.100907	0.562681	1132.42	0.170785	0.234648	0.605002	1016.45	-0.106886	0.25304	0.758673	Pro-specific TNF	NA
ENSG00000226396	AL031727.1	86.6818	0.0906806	0.230815	0.846734	102.152	0.15599	0.190899	0.591842	81.9127	-0.664802	0.307454	0.0672947	73.3241	-1.07009	0.326851	0.0028871	NA	TPA-specific
ENSG00000169914	OTUD3	1101	-0.0130547	0.0786112	0.940377	631.901	0.115947	0.086543	0.32977	1304.19	-0.576784	0.20073	0.0113242	1295.17	-0.552662	0.205628	0.0164678	NA	Conserved diff
ENSG00000187980	PLA2G2C	34.711	-0.707131	0.351332	0.171711	194.807	-0.523217	0.158452	0.00390825	166.302	0.341651	0.258923	0.303692	194.493	0.753544	0.268988	0.0120053	Gran-specific TNF	TPA-specific
ENSG00000090432	MUL1	781.716	-0.0444003	0.0900273	0.806538	565.396	-0.0738798	0.0937994	0.608546	1720.74	0.172883	0.131397	0.305301	2076.09	0.675338	0.194251	0.00146678	NA	TPA-specific
ENSG00000158828	PINK1	219.217	-0.368786	0.141954	0.0556263	168.969	-0.319757	0.154374	0.0974609	313.051	-0.244399	0.134243	0.134147	916.606	2.15837	0.187132	1.47879e-29	NA	TPA-specific
ENSG00000117242	PINK1-AS	579.909	-0.0677894	0.0981003	0.724498	503.376	-0.0378615	0.101973	0.828028	409.482	0.441106	0.109788	0.000230826	457.257	0.735024	0.136182	3.19935e-07	NA	Conserved diff
ENSG00000075151	EIF4G3	2929.27	0.0285851	0.060375	0.814965	6927.25	-0.175464	0.050913	0.00242649	10075.3	1.49515	0.160197	1.56241e-19	10183.5	1.5413	0.175474	1.5335e-17	Gran-specific TNF	Conserved diff
ENSG00000117298	ECE1	1107.57	0.999632	0.0862965	4.95103e-29	900.729	1.28921	0.0843767	5.00292e-51	1794.13	-0.430294	0.129672	0.00289771	1883.12	-0.231779	0.166278	0.251466	Conserved TNF	ATRA-specific
ENSG00000187952	HS6ST1P1	49.4286	-0.798476	0.299371	0.0473733	10.3487	0.44881	0.593613	0.625554	145.748	-1.7205	0.239047	5.67199e-12	264.608	0.481404	0.255046	0.106642	Pro-specific TNF	ATRA-specific
ENSG00000142794	NBPF3	231.597	-0.0030605	0.137319	0.992926	92.5321	-0.457838	0.225208	0.105181	356.301	-0.785551	0.18923	0.000135428	303.909	-1.44926	0.177351	2.62448e-15	NA	Conserved diff
ENSG00000090686	USP48	3665.97	0.193473	0.0660882	0.0250516	3013.25	0.134225	0.0546607	0.0417622	7004.85	-0.389419	0.0771979	2.41705e-06	7244.19	-0.240396	0.107033	0.0495365	Conserved TNF	Conserved diff
ENSG00000142798	HSPG2	49.5588	-0.00616211	0.295597	0.993081	390.578	0.289097	0.127331	0.063983	709.48	2.83004	0.312741	2.07201e-18	1177.13	3.66066	0.308157	2.70121e-31	NA	Conserved diff
ENSG00000218510	LINC00339	214.004	-0.348536	0.146479	0.0879728	220.803	-1.07746	0.143055	6.67071e-13	1034.99	-0.0289499	0.171939	0.915599	727.444	-1.29506	0.191316	8.31893e-11	Gran-specific TNF	TPA-specific
ENSG00000070831	CDC42	9692.27	0.123454	0.0603272	0.1623	14564.2	0.215387	0.0383212	1.58838e-07	21865.1	0.814003	0.159653	1.84475e-06	22314.3	0.885817	0.192773	1.68476e-05	Gran-specific TNF	Conserved diff
ENSG00000184677	ZBTB40	2231.96	-0.0542019	0.0653388	0.662133	2276.53	0.0735869	0.0543045	0.322607	4296.62	0.400945	0.185011	0.0665825	4327.24	0.452894	0.197823	0.0448211	NA	TPA-specific
ENSG00000004487	KDM1A	4770.08	-0.0924977	0.057061	0.306252	1807.34	-0.157481	0.0602856	0.0285021	8478.49	-0.769021	0.143423	4.76285e-07	8188.67	-0.860389	0.168168	1.37602e-06	Gran-specific TNF	Conserved diff
ENSG00000169641	LUZP1	1859.69	-0.10874	0.0676705	0.312298	2626.15	0.474886	0.0631	6.96173e-13	3362.81	0.206524	0.232014	0.514203	6144.62	1.57962	0.238812	2.30955e-10	Gran-specific TNF	TPA-specific
ENSG00000261326	LINC01355	545.929	-0.0996943	0.11637	0.65125	311.355	-0.150707	0.117227	0.353687	612.149	-1.23854	0.339865	0.000946856	522.743	-2.10002	0.398567	6.28788e-07	NA	Conserved diff
ENSG00000125944	HNRNPR	10594.7	0.0359052	0.0567908	0.750192	4457.11	-0.0946596	0.0528511	0.16541	13269.4	-0.61536	0.146638	0.000112502	12584.3	-0.770569	0.177013	4.90929e-05	NA	Conserved diff
ENSG00000125945	ZNF436	423.405	-0.06503	0.114692	0.776551	279.544	-0.0517587	0.123665	0.804867	796.985	-0.45639	0.128459	0.00130838	1049.25	0.383869	0.166819	0.0435678	NA	Opposite diff
ENSG00000249087	ZNF436-AS1	52.3696	-0.133112	0.277253	0.811596	24.2624	0.312446	0.411403	0.623834	166.237	-1.32792	0.168967	4.2282e-14	189.39	-0.706257	0.152772	1.48293e-05	NA	Conserved diff
ENSG00000007968	E2F2	1323.84	-0.311229	0.0740375	0.000378354	1246.04	0.231516	0.0682938	0.00293295	2652.53	-0.275118	0.122236	0.0554266	1729.52	-2.27969	0.199479	4.92e-29	Opposite TNF	TPA-specific
ENSG00000142676	RPL11	24959.2	-0.0916245	0.0692153	0.433842	19072.3	0.233649	0.0593639	0.000415451	107704	-0.518691	0.267609	0.107032	94886.1	-0.965981	0.286677	0.00210718	Gran-specific TNF	TPA-specific
ENSG00000011007	ELOA	3380.78	0.179837	0.0574629	0.0144173	2927.22	0.62159	0.0554572	1.02797e-27	3672.07	0.112591	0.117119	0.47699	4285.66	0.545175	0.168042	0.00317486	Conserved TNF	TPA-specific
ENSG00000236810	ELOA-AS1	56.1454	-0.0259083	0.269988	0.966988	52.7929	-0.577363	0.264994	0.0781576	66.3941	-0.188068	0.194019	0.472822	53.4476	-0.915129	0.245471	0.000596363	NA	TPA-specific
ENSG00000057757	PITHD1	1664.3	-0.0280317	0.0691589	0.841804	706.401	0.0279096	0.0914248	0.861078	3764.82	-0.988498	0.205841	7.80165e-06	4362.64	-0.391252	0.227002	0.145043	NA	ATRA-specific
ENSG00000011009	LYPLA2	1205.46	-0.00537009	0.0776933	0.97634	1747.35	0.417433	0.0623541	2.36351e-10	4374.92	0.213879	0.195237	0.40762	5196.38	0.673109	0.235175	0.0100921	Gran-specific TNF	TPA-specific
ENSG00000117308	GALE	564.845	-0.0848334	0.0980155	0.647435	243.08	0.142115	0.134824	0.467435	1646.76	-0.772112	0.132777	3.96026e-08	3008.79	0.949934	0.171325	1.44258e-07	NA	Opposite diff
ENSG00000117305	HMGCL	293.801	-0.283136	0.123581	0.104547	662.905	-0.49463	0.0896151	2.73329e-07	2075.75	0.619506	0.203759	0.00694563	2297.64	0.879043	0.22597	0.000323966	Gran-specific TNF	Conserved diff
ENSG00000179163	FUCA1	249.517	-0.0532432	0.135632	0.846869	1731.42	-0.283654	0.0729181	0.000495227	3577.25	2.03451	0.155506	1.37999e-37	3922.55	2.21827	0.189908	2.72814e-30	Gran-specific TNF	Conserved diff
ENSG00000188822	CNR2	116.436	-0.431567	0.187832	0.103397	5.6185	0.741737	0.829364	0.549829	305.258	-4.5438	0.226408	1.41318e-87	1595.29	2.17596	0.155458	4.27243e-43	NA	Opposite diff
ENSG00000189266	PNRC2	5524.31	0.160982	0.0590965	0.0415939	5515.28	0.107934	0.0449907	0.047689	10943.6	0.0265029	0.160685	0.917216	9762	-0.283405	0.186132	0.204869	Conserved TNF	NA
ENSG00000188529	SRSF10	9887.02	0.123569	0.0525233	0.0929852	5729.66	0.086386	0.0518919	0.20458	14717.3	-0.538594	0.0873975	5.12935e-09	12746.1	-1.05578	0.103081	1.67034e-23	NA	Conserved diff
ENSG00000001460	STPG1	49.2937	-0.374082	0.298383	0.468295	22.7778	0.262259	0.397233	0.676652	104.587	-0.691585	0.221948	0.00551089	108.483	-0.515419	0.219745	0.0392627	NA	Conserved diff
ENSG00000001461	NIPAL3	1261.1	-0.247061	0.0731701	0.00700205	921.719	-0.804115	0.0806148	4.30819e-22	2913.94	-0.598349	0.142779	0.000115149	3463.76	-0.00116001	0.174017	0.996304	Conserved TNF	ATRA-specific
ENSG00000117602	RCAN3	288.25	-0.649955	0.125323	4.51144e-06	474.319	-0.172508	0.0997605	0.183896	667.911	-0.36643	0.11379	0.00397617	996.079	0.748968	0.138552	3.05737e-07	Pro-specific TNF	Opposite diff
ENSG00000133226	SRRM1	7760.23	0.0129213	0.0614378	0.922627	4463.63	-0.0392134	0.0573986	0.664433	7736.34	-0.144664	0.126243	0.382937	7010.3	-0.418334	0.143223	0.00852909	NA	TPA-specific
ENSG00000169504	CLIC4	3327.08	1.01227	0.0673803	8.52506e-49	7174.19	2.70613	0.0527564	0	5951.52	0.72887	0.145344	2.80271e-06	8838.95	1.58296	0.166023	1.70751e-20	Conserved TNF	Conserved diff
ENSG00000020633	RUNX3	2285.36	0.258122	0.0685288	0.00193088	5073.02	0.307644	0.0597642	1.89495e-06	6174.18	0.477045	0.112469	9.34826e-05	6263.31	0.542085	0.179732	0.00643039	Conserved TNF	Conserved diff
ENSG00000117614	SYF2	1127.52	-0.00193249	0.0769012	0.992094	917.982	-0.373273	0.0766393	7.34404e-06	5116.78	-0.336477	0.240439	0.270855	5748.28	0.0498124	0.259641	0.895584	Gran-specific TNF	NA
ENSG00000284602	AL031432.4	67.904	0.00440025	0.240669	0.993716	64.703	-0.245083	0.236184	0.475366	95.0241	-0.146876	0.201689	0.604779	65.7523	-1.56587	0.285212	1.94141e-07	NA	TPA-specific
ENSG00000261349	AL031432.2	47.4124	0.196479	0.287174	0.727566	32.2579	1.34795	0.395752	0.00278006	78.8427	-0.665718	0.300519	0.0598955	63.3415	-1.59273	0.340017	1.11516e-05	Gran-specific TNF	TPA-specific
ENSG00000183726	TMEM50A	2677.22	0.1021	0.0691106	0.366512	2562.96	0.172568	0.053205	0.00471411	7576.83	0.266493	0.180932	0.242586	9658.32	0.879963	0.212193	0.000116879	Gran-specific TNF	TPA-specific
ENSG00000204178	TMEM57	1335.6	-0.110444	0.0751994	0.369815	2866.34	-0.523073	0.0508459	1.87572e-23	4624.57	1.15922	0.113078	2.21669e-23	3089.25	0.246729	0.158922	0.195072	Gran-specific TNF	ATRA-specific
ENSG00000157978	LDLRAP1	593.353	-0.42982	0.098984	0.000215059	323.112	-0.539263	0.125298	9.38634e-05	1457.87	-0.98543	0.121776	6.73541e-15	3216.88	1.23949	0.163116	2.29239e-13	Conserved TNF	Opposite diff
ENSG00000117643	MAN1C1	300.88	-0.566285	0.14679	0.00140418	160.281	-1.04828	0.174495	1.72691e-08	854.05	-1.44977	0.132314	1.36354e-26	1190.08	-0.110113	0.182441	0.650886	Conserved TNF	ATRA-specific
ENSG00000162430	SELENON	862.827	-0.212104	0.0897092	0.0909451	738.504	0.0794006	0.0840627	0.523024	2086.72	0.0185686	0.144396	0.93608	5094.2	1.99228	0.19402	1.28179e-23	NA	TPA-specific
ENSG00000117640	MTFR1L	807.319	-0.0189552	0.0888312	0.921586	1199.75	-0.423738	0.0694618	9.92281e-09	3082.72	0.626311	0.108197	4.59972e-08	2831.56	0.448645	0.127381	0.00125429	Gran-specific TNF	Conserved diff
ENSG00000127423	AUNIP	752.343	-0.137612	0.0867314	0.321239	346.886	-0.0337559	0.119228	0.871537	1513.96	-0.819061	0.17133	8.63179e-06	1141.28	-2.35952	0.193502	6.357e-33	NA	Conserved diff
ENSG00000117632	STMN1	16208.6	-0.00784849	0.0560086	0.949482	9386.17	-0.0733322	0.0439251	0.202939	35828.9	-0.512156	0.224309	0.0514054	24923.2	-2.34732	0.240874	2.28279e-21	NA	TPA-specific
ENSG00000158006	PAFAH2	218.169	-0.175823	0.140716	0.470822	827.091	-0.401703	0.075038	6.58436e-07	1284.15	1.90229	0.127258	7.31607e-49	1236.51	1.85492	0.163136	9.39972e-29	Gran-specific TNF	Conserved diff
ENSG00000175087	PDIK1L	889.064	-0.182717	0.0859572	0.14185	456.326	-0.626403	0.099814	3.42208e-09	1596.74	-0.678926	0.123424	2.27534e-07	1606.4	-0.612434	0.148915	0.000134586	Gran-specific TNF	Conserved diff
ENSG00000142675	CNKSR1	33.6822	-0.307049	0.365523	0.658213	14.3646	0.381776	0.560956	0.665713	37.0841	-0.159861	0.243757	0.647006	23.3572	-2.21678	0.448127	3.2045e-06	NA	TPA-specific
ENSG00000130695	CEP85	2857.94	-0.0638512	0.0593591	0.550513	2066.6	0.35729	0.0556298	1.37848e-09	4887.85	-0.108419	0.164504	0.645029	5280.76	0.15069	0.178601	0.513804	Gran-specific TNF	NA
ENSG00000142669	SH3BGRL3	3058.81	-0.266638	0.0713154	0.00212709	11227.8	0.197547	0.106678	0.148671	13194.6	1.7306	0.17208	1.56405e-22	41790.6	3.68225	0.223086	1.36174e-59	Pro-specific TNF	Conserved diff
ENSG00000158062	UBXN11	1605.41	-0.0473022	0.0823005	0.773396	552.461	0.0232538	0.0913301	0.8863	3567.09	-0.767631	0.186871	0.00016171	3056.33	-1.41217	0.201506	1.63745e-11	NA	Conserved diff
ENSG00000169442	CD52	31.6641	-0.578827	0.365275	0.322082	438.349	0.253957	0.109271	0.0566486	1808.83	2.41763	0.308	4.54575e-14	17780.9	5.95465	0.313062	7.60818e-79	NA	Conserved diff
ENSG00000117682	DHDDS	1380.89	0.0204852	0.0722343	0.893562	1223.69	0.306896	0.0693731	5.62559e-05	2560.51	0.0951773	0.0876102	0.412175	2875.15	0.43509	0.112187	0.000338888	Gran-specific TNF	TPA-specific
ENSG00000198830	HMGN2	20822.2	-0.0395747	0.0541625	0.706813	21530.6	0.00203136	0.0406216	0.977786	36086.8	0.375473	0.189063	0.0973933	18986.9	-2.16817	0.222306	2.10943e-21	NA	TPA-specific
ENSG00000117676	RPS6KA1	6264.03	0.030555	0.0620721	0.807016	13085.3	-0.122908	0.0463088	0.0256292	23424.5	1.16922	0.101619	3.07824e-29	31306.7	1.764	0.170838	7.16088e-24	Gran-specific TNF	Conserved diff
ENSG00000260063	AL512408.1	25.9154	0.794219	0.422862	0.212346	27.0487	0.889613	0.397384	0.0688309	29.7081	0.698811	0.304387	0.0498909	15.5406	-1.43005	0.483748	0.00768632	NA	Opposite diff
ENSG00000117713	ARID1A	7276.08	-0.0599629	0.0708241	0.655033	8091.76	0.120911	0.0563129	0.083278	14623.8	0.575132	0.197201	0.010009	13139.3	0.341996	0.207438	0.16563	NA	ATRA-specific
ENSG00000060642	PIGV	314.208	0.290455	0.126701	0.104318	298.303	-0.460176	0.119467	0.000571557	1368.47	-0.290641	0.119283	0.0357899	1112.08	-1.01612	0.154462	2.93134e-10	Gran-specific TNF	Conserved diff
ENSG00000204160	ZDHHC18	1170.65	0.550469	0.0769922	3.29186e-11	2443.99	1.65852	0.0596005	3.96974e-168	4014.17	0.897037	0.112616	1.84256e-14	5363.59	1.52139	0.176421	6.12068e-17	Conserved TNF	Conserved diff
ENSG00000142751	GPN2	1474.16	-0.101268	0.0819973	0.47776	907.428	0.0754786	0.0727098	0.47519	3007.13	-0.503897	0.096154	8.97582e-07	3221.64	-0.236004	0.128951	0.119056	NA	ATRA-specific
ENSG00000090273	NUDC	4747.95	-0.136452	0.0699279	0.188901	1420.67	0.152675	0.0646309	0.0518781	6951.36	-1.34815	0.247978	3.21153e-07	7269.15	-1.08234	0.275805	0.000283946	NA	Conserved diff
ENSG00000253368	TRNP1	32.8966	0.365478	0.364716	0.585002	8.24198	1.57019	0.723562	0.0795468	34.2283	-2.46046	0.429368	6.38617e-08	144.651	2.03388	0.282885	4.58201e-12	NA	Opposite diff
ENSG00000158246	FAM46B	31.033	0.621507	0.409221	0.348987	43.2904	0.852134	0.339405	0.0365761	105.605	0.314678	0.203772	0.216651	53.3286	-2.82683	0.323904	2.49895e-17	Gran-specific TNF	TPA-specific
ENSG00000090020	SLC9A1	771.632	-0.0821081	0.0973504	0.656219	3109.6	0.0598138	0.0647768	0.533686	4104.71	2.19579	0.142428	6.28221e-52	2793.36	1.51017	0.1827	1.22063e-15	NA	Conserved diff
ENSG00000225159	NPM1P39	34.1064	0.198322	0.364537	0.7871	6.93181	-0.499348	0.723307	0.660925	93.8876	-1.38765	0.29737	1.46588e-05	87.7862	-1.71505	0.318766	3.50397e-07	NA	Conserved diff
ENSG00000142784	WDTC1	1513.64	-0.129942	0.085701	0.350337	2114.53	0.0746722	0.0596787	0.369437	5636.52	0.39059	0.120913	0.00384923	6334.8	0.705491	0.180526	0.00030226	NA	Conserved diff
ENSG00000186501	TMEM222	814.065	-0.106005	0.101017	0.563958	769.391	0.369255	0.0806937	2.88005e-05	1772.06	-0.10287	0.172892	0.681518	1993.46	0.26012	0.211184	0.319084	Gran-specific TNF	NA
ENSG00000142765	SYTL1	839.048	-0.477126	0.0917097	4.18247e-06	474.414	0.609752	0.0962786	2.40399e-09	7612.27	-1.21697	0.185681	4.39958e-10	7535.26	-1.20804	0.17838	8.15365e-11	Opposite TNF	Conserved diff
ENSG00000142733	MAP3K6	150.393	-0.00428666	0.196602	0.993081	178.578	0.921093	0.147194	3.82276e-09	438.943	-0.106313	0.136032	0.574797	512.064	0.355792	0.131251	0.0154635	Gran-specific TNF	TPA-specific
ENSG00000181773	GPR3	111.529	-0.0107997	0.214072	0.983133	27.2985	0.639105	0.371228	0.186334	170.542	-1.00659	0.161195	3.09474e-09	216.56	-0.114865	0.190073	0.650496	NA	ATRA-specific
ENSG00000158195	WASF2	6528.96	-0.0914527	0.0624323	0.37156	7545.02	0.401015	0.0550548	4.08293e-12	13521.7	0.400206	0.170769	0.044688	16223.9	0.863914	0.194626	3.39404e-05	Gran-specific TNF	Conserved diff
ENSG00000126705	AHDC1	1546.68	0.17494	0.0910807	0.198272	1521.45	1.4304	0.0824901	1.47419e-65	1547.19	-0.350199	0.153986	0.052475	2631.7	1.05312	0.186211	7.81032e-08	Gran-specific TNF	TPA-specific
ENSG00000000938	FGR	55.2462	1.66787	0.282077	8.91921e-08	1683.46	0.686352	0.0673837	5.21567e-23	8735.39	7.5296	0.15109	0	488.429	3.24953	0.180354	7.69558e-71	Conserved TNF	Conserved diff
ENSG00000126709	IFI6	154.289	-0.0160299	0.181625	0.969986	2213.44	0.0548186	0.0595497	0.535298	18928.5	5.19913	0.272193	2.24036e-79	10483.2	4.33078	0.295363	3.35989e-47	NA	Conserved diff
ENSG00000009780	FAM76A	497.299	-0.176062	0.12046	0.372689	371.301	-0.19655	0.105563	0.145949	662.012	0.303584	0.155763	0.104886	679.912	0.402084	0.174712	0.0435361	NA	TPA-specific
ENSG00000117758	STX12	926.649	0.116106	0.0834634	0.403796	1788.67	0.195349	0.0598505	0.00441664	3087.76	0.71994	0.105738	8.17233e-11	3482.31	1.01581	0.123272	1.50161e-15	Gran-specific TNF	Conserved diff
ENSG00000130775	THEMIS2	1670.63	0.0534272	0.0718755	0.700888	6801.73	0.151134	0.0464581	0.00456859	11093.5	3.31076	0.134395	1.05512e-131	6363.7	2.41697	0.17266	4.19991e-43	Gran-specific TNF	Conserved diff
ENSG00000158161	EYA3	4321.97	0.287769	0.0577093	1.19224e-05	4529.08	0.918678	0.0520887	8.53144e-68	5281.45	0.243621	0.129956	0.121097	6089	0.63274	0.143923	4.08023e-05	Conserved TNF	TPA-specific
ENSG00000238231	AL512288.2	33.683	0.217291	0.344981	0.751275	49.5719	1.0622	0.28371	0.000853738	1.8334	1.21862	1.06353	0.382971	3.58337	2.48039	1.01917	0.0317234	Gran-specific TNF	TPA-specific
ENSG00000240750	RN7SL559P	51.0626	0.405331	0.295281	0.411911	90.7893	1.49705	0.225229	3.23415e-10	6.60894	2.47591	0.680782	0.000972779	7.5144	2.73301	0.760791	0.000974687	Gran-specific TNF	Conserved diff
ENSG00000169403	PTAFR	233.558	3.24811	0.186347	1.19096e-65	359.094	3.53804	0.145392	1.09323e-128	916.774	1.85721	0.157391	1.04583e-30	8213.93	5.35568	0.170984	1.02543e-212	Conserved TNF	Conserved diff
ENSG00000126698	DNAJC8	3902.86	0.126142	0.0583799	0.132678	2379.09	0.163871	0.0568533	0.0138833	8002.84	-0.314693	0.210879	0.235286	8072.27	-0.251429	0.237009	0.39963	Gran-specific TNF	NA
ENSG00000270605	AL353622.1	35.4726	0.188378	0.389349	0.810031	46.0541	-0.958018	0.298649	0.00526379	222.401	-0.72172	0.208349	0.00178445	178.797	-1.69843	0.3027	1.00011e-07	Gran-specific TNF	Conserved diff
ENSG00000130766	SESN2	349.327	0.256204	0.117431	0.127746	401.046	0.401456	0.103587	0.000522855	2689.32	-0.199678	0.255446	0.574768	2650.41	-0.206583	0.168185	0.320583	Gran-specific TNF	NA
ENSG00000130772	MED18	243.161	-0.258267	0.134819	0.19974	253.91	-0.692175	0.128613	5.6844e-07	1331.37	0.09985	0.253215	0.79527	1286.1	0.0322904	0.275928	0.936163	Gran-specific TNF	NA
ENSG00000204138	PHACTR4	1714.51	-0.0264799	0.0675175	0.846985	1352.5	0.0121372	0.0788061	0.933928	2714.68	-0.20797	0.124433	0.175197	2462.89	-0.484571	0.133423	0.000846497	NA	TPA-specific
ENSG00000180198	RCC1	6071.94	0.055002	0.0557249	0.591783	1102.76	-0.0488862	0.0677809	0.644163	7777.33	-1.62128	0.151679	2.42077e-25	6846.21	-2.47101	0.18461	1.72032e-39	NA	Conserved diff
ENSG00000242125	SNHG3	7751.6	0.266526	0.059843	0.000135044	2867.64	0.42328	0.0555158	3.34797e-13	3463.18	-1.76222	0.186053	4.33574e-20	3320.95	-1.96503	0.212406	2.37557e-19	Conserved TNF	Conserved diff
ENSG00000200087	SNORA73B	1490.05	0.100883	0.102132	0.59149	584.96	0.690035	0.0899525	2.36207e-13	49.4021	-1.50458	0.250846	1.36817e-08	46.8493	-1.72317	0.32817	6.91322e-07	Gran-specific TNF	Conserved diff
ENSG00000279443	AL513497.1	80.3001	-0.131409	0.249155	0.792738	22.9814	0.134468	0.405512	0.847419	134.781	-1.86749	0.224322	1.02792e-15	130.521	-2.01811	0.261422	9.13776e-14	NA	Conserved diff
ENSG00000180098	TRNAU1AP	577.689	0.112436	0.0973152	0.513891	509.106	0.440876	0.0975669	3.72042e-05	1155.76	-0.291196	0.195098	0.235205	1189.94	-0.16456	0.211826	0.551338	Gran-specific TNF	NA
ENSG00000197989	SNHG12	3302.93	0.457834	0.0746526	2.39809e-08	1121.3	0.499662	0.0710959	2.4565e-11	2150.98	-1.27739	0.193903	3.53204e-10	1967.6	-1.70319	0.204831	8.13331e-16	Conserved TNF	Conserved diff
ENSG00000221539	SNORD99	104.617	0.545529	0.204873	0.0478713	29.8115	0.230641	0.351818	0.67901	38.2091	-1.3311	0.35644	0.000679101	38.2402	-1.26398	0.377912	0.00228878	Pro-specific TNF	Conserved diff
ENSG00000162419	GMEB1	1053.95	0.245344	0.0928102	0.0500647	1230	0.260231	0.0697114	0.000889182	2011.59	0.403715	0.110192	0.000881046	1719.21	0.0148582	0.132831	0.93874	Gran-specific TNF	ATRA-specific
ENSG00000116350	SRSF4	3842.78	0.00736817	0.0596147	0.954243	3813.13	0.158412	0.0491384	0.00501221	7360.77	-0.0186313	0.114014	0.917733	7214.66	-0.0419918	0.135805	0.825784	Gran-specific TNF	NA
ENSG00000116353	MECR	865.437	-0.0289028	0.083073	0.866659	341.351	0.0284527	0.109773	0.883769	1133.28	-1.00477	0.167007	1.22667e-08	1167.77	-0.831795	0.199694	0.00010836	NA	Conserved diff
ENSG00000186056	MATN1-AS1	52.9687	0.179464	0.28853	0.754628	43.2426	-0.206373	0.287156	0.645405	50.2503	-0.761103	0.237694	0.00421611	43.3891	-1.33565	0.292894	1.97555e-05	NA	Conserved diff
ENSG00000162511	LAPTM5	9141.98	-0.0854226	0.0619648	0.409846	32481.8	-0.065698	0.0481337	0.318204	52928.2	1.68994	0.124502	2.11432e-40	129557	3.24357	0.181948	2.262e-69	NA	Conserved diff
ENSG00000060688	SNRNP40	2955.11	0.0611371	0.0583376	0.564505	1487.58	-0.0371546	0.0606816	0.701955	3756.09	-0.593928	0.186114	0.00435869	3370.29	-0.974745	0.21013	1.37769e-05	NA	Conserved diff
ENSG00000121766	ZCCHC17	1237.08	0.0304815	0.07147	0.833659	735.803	-0.288771	0.0828833	0.00213734	1964.79	-0.351148	0.213209	0.182614	1836.78	-0.543148	0.236171	0.0436938	Gran-specific TNF	TPA-specific
ENSG00000269967	AL136115.2	64.5342	0.355047	0.259211	0.413064	106.456	1.15403	0.204501	1.40409e-07	5.7476	0.641007	0.612752	0.432856	10.954	1.9849	0.594933	0.00235183	Gran-specific TNF	TPA-specific
ENSG00000184007	PTP4A2	8363.24	0.0767974	0.0518154	0.364793	7791.65	0.410069	0.0421337	4.58286e-21	19211.3	0.248374	0.156777	0.202859	22974	0.719994	0.187798	0.000401446	Gran-specific TNF	TPA-specific
ENSG00000121774	KHDRBS1	7736.27	-0.0840943	0.0674571	0.472318	5226.03	0.206192	0.0446148	2.34823e-05	17314.1	-0.239094	0.165877	0.254615	14861.4	-0.727046	0.197283	0.000697507	Gran-specific TNF	TPA-specific
ENSG00000121775	TMEM39B	493.224	-0.0490221	0.100559	0.808258	333.905	-0.255682	0.110713	0.0586004	1329.23	-0.261412	0.161181	0.190407	1177.37	-0.636491	0.196819	0.00328134	NA	TPA-specific
ENSG00000025800	KPNA6	3747.89	0.067785	0.0557282	0.486512	3036.83	-0.085579	0.0579859	0.27279	5089.77	0.263969	0.15757	0.174022	5335.91	0.419932	0.1679	0.0268176	NA	TPA-specific
ENSG00000084652	TXLNA	4179.46	-0.015199	0.0585374	0.903098	4114.17	0.345708	0.0532301	8.73756e-10	8074.13	0.0498436	0.100434	0.737093	8521.01	0.232416	0.143921	0.175483	Gran-specific TNF	NA
ENSG00000160051	IQCC	187.828	-0.0190461	0.163406	0.95759	77.5449	0.423482	0.216462	0.122556	327.292	-0.48331	0.168699	0.0116055	242.291	-1.81492	0.208866	3.46832e-17	NA	Conserved diff
ENSG00000160055	TMEM234	156.659	0.206142	0.175849	0.505463	336.167	0.53363	0.114722	2.04548e-05	331.504	0.883214	0.196416	3.14306e-05	326.949	0.87797	0.203596	5.85185e-05	Gran-specific TNF	Conserved diff
ENSG00000084623	EIF3I	7449.19	-0.043415	0.0675026	0.746642	3332.94	0.17411	0.0515649	0.00306474	16434	-0.759831	0.211052	0.00110798	15740.2	-0.887551	0.241862	0.000738021	Gran-specific TNF	Conserved diff
ENSG00000116478	HDAC1	4717.52	0.0471208	0.0580764	0.670509	6326.05	-0.0758775	0.0423965	0.165706	20066.6	0.630199	0.135257	1.5147e-05	12896.5	-0.606058	0.163958	0.000670204	NA	Opposite diff
ENSG00000175130	MARCKSL1	607.554	0.164382	0.101859	0.309269	8180.55	0.134088	0.0560391	0.0483853	12166.4	3.44436	0.216381	2.56319e-55	1776.13	-0.407404	0.250885	0.172918	Gran-specific TNF	ATRA-specific
ENSG00000160058	BSDC1	1119.2	0.202462	0.073967	0.0402328	1498.44	0.326693	0.0605784	5.35577e-07	4523.67	0.432052	0.117203	0.000811461	5292.31	0.835393	0.143578	3.10745e-08	Conserved TNF	Conserved diff
ENSG00000176261	ZBTB8OS	791.032	0.0830142	0.0887206	0.616579	665.882	0.124382	0.0880873	0.298441	1406.18	-0.207841	0.244776	0.53771	1095.45	-1.09182	0.257783	8.09975e-05	NA	TPA-specific
ENSG00000162521	RBBP4	12884.1	0.0790229	0.0564227	0.40023	7080.07	0.00857032	0.0441647	0.915324	16182.7	-0.398703	0.120812	0.00307656	13660.3	-0.992687	0.147328	1.0227e-10	NA	Conserved diff
ENSG00000134684	YARS	7202.3	-0.0141897	0.0550981	0.903921	2985.22	0.0728482	0.0525013	0.308894	17083.6	-0.538942	0.16097	0.00262848	17327.7	-0.448778	0.192123	0.0401829	NA	Conserved diff
ENSG00000116497	S100PBP	1573.79	-0.06863	0.0768239	0.636223	1725.25	-0.569725	0.0653408	4.88101e-17	3149.23	-0.0309064	0.098688	0.83984	2416.66	-0.892828	0.153935	3.446e-08	Gran-specific TNF	TPA-specific
ENSG00000116514	RNF19B	582.727	0.636417	0.0980383	2.66799e-09	1739.33	2.29739	0.0711449	2.35068e-226	1151.95	0.269821	0.163149	0.180618	1919.81	1.44363	0.177131	3.11774e-15	Conserved TNF	TPA-specific
ENSG00000004455	AK2	12734.8	-0.0298885	0.0516251	0.771181	6147.37	0.105993	0.0444133	0.0491035	28776.7	-0.926285	0.159594	4.21097e-08	28852	-0.867102	0.190925	2.14865e-05	Gran-specific TNF	Conserved diff
ENSG00000116525	TRIM62	144.989	-0.23623	0.177575	0.431805	360.547	0.0282581	0.113509	0.888183	311.098	1.01658	0.156758	6.88652e-10	374.163	1.42335	0.172149	1.19888e-15	NA	Conserved diff
ENSG00000160094	ZNF362	220.566	-0.517047	0.158892	0.0101659	627.666	-0.892061	0.0878241	6.95004e-23	1179.15	1.09807	0.139781	4.33709e-14	1045	0.859758	0.192284	2.94229e-05	Conserved TNF	Conserved diff
ENSG00000134686	PHC2	1223.11	-0.385664	0.0737923	3.73025e-06	2127.31	-0.323694	0.0700609	2.36146e-05	5279.02	1.04558	0.122515	1.81363e-16	4980.46	0.945225	0.191374	3.32675e-06	Conserved TNF	Conserved diff
ENSG00000222112	RN7SKP16	29.6216	-0.584822	0.386348	0.351691	74.6705	-0.168414	0.240581	0.655248	19.3154	1.76865	0.529916	0.00271947	14.0438	1.20622	0.784709	0.200043	NA	ATRA-specific
ENSG00000241014	AC114490.1	31.4106	0.294525	0.364533	0.671655	131.486	-0.316614	0.180954	0.177587	174.385	1.5623	0.217688	6.55073e-12	135.725	1.08902	0.264561	0.000132551	NA	Conserved diff
ENSG00000163867	ZMYM6	624.331	0.0136704	0.0997631	0.950031	769.888	-0.347781	0.0772906	4.03708e-05	1374.5	0.313788	0.10774	0.0101241	1377.88	0.351595	0.131752	0.0173395	Gran-specific TNF	Conserved diff
ENSG00000116560	SFPQ	21138.3	0.00505644	0.0520794	0.966597	16118.1	0.393473	0.0400373	1.81989e-21	28881.7	-0.0100374	0.0811648	0.938644	24870	-0.439077	0.10179	5.82026e-05	Gran-specific TNF	TPA-specific
ENSG00000146463	ZMYM4	4160.59	0.0287088	0.0567552	0.801573	4629.11	-0.194778	0.0462198	0.000136741	8273.02	0.26961	0.148009	0.13391	5785.74	-0.83044	0.160077	9.56565e-07	Gran-specific TNF	TPA-specific
ENSG00000229994	RPL5P4	58.7221	-0.247284	0.27067	0.626743	73.8928	-0.0331642	0.236388	0.939587	118.981	-0.611494	0.336864	0.13547	92.8443	-1.72273	0.366689	1.04673e-05	NA	TPA-specific
ENSG00000142687	KIAA0319L	1465.84	-0.0535595	0.0716204	0.698561	2471.95	-0.2718	0.0542819	3.79683e-06	5533.3	0.849723	0.087429	4.20878e-21	4647.72	0.468749	0.115509	0.000167944	Gran-specific TNF	Conserved diff
ENSG00000020129	NCDN	1446.57	-0.124388	0.0898938	0.40747	950.432	0.228895	0.07288	0.00647548	2997.6	-0.166361	0.12729	0.308958	4110.52	0.702277	0.182485	0.000379521	Gran-specific TNF	TPA-specific
ENSG00000239636	AC004865.2	27.0727	-0.0127422	0.423062	0.990042	15.9938	0.312891	0.478741	0.680068	34.9576	-1.42412	0.282108	2.37349e-06	33.9174	-1.49563	0.306809	4.54525e-06	NA	Conserved diff
ENSG00000116819	TFAP2E	30.9232	-0.459297	0.375624	0.483448	24.5431	0.144907	0.404354	0.834753	82.0599	-0.74017	0.245718	0.00756506	117.86	0.409166	0.268642	0.204773	NA	ATRA-specific
ENSG00000126067	PSMB2	5574.98	-0.035275	0.0595419	0.766786	3278.96	0.229489	0.0634814	0.00135685	8923.07	-0.243361	0.180643	0.292021	7751.11	-0.687572	0.219947	0.00460049	Gran-specific TNF	TPA-specific
ENSG00000142686	C1orf216	890.185	-0.0905869	0.0815766	0.535559	701.815	0.696641	0.082123	3.682e-16	2645.59	-0.830243	0.181893	2.3265e-05	4079.47	0.523145	0.214306	0.0311548	Gran-specific TNF	Opposite diff
ENSG00000092853	CLSPN	4166.58	0.17494	0.0614824	0.030852	1714.99	0.252967	0.0644408	0.000431493	2359.25	-0.351116	0.248088	0.264538	1551.96	-2.39943	0.259276	2.31255e-19	Conserved TNF	TPA-specific
ENSG00000134698	AGO4	817.412	-0.12489	0.0974979	0.454604	2092	-0.375381	0.0583603	1.2988e-09	5374.86	1.41618	0.149867	5.32537e-20	3866.27	0.743198	0.160466	1.42482e-05	Gran-specific TNF	Conserved diff
ENSG00000092847	AGO1	3247.12	-0.0377712	0.0672354	0.778761	20427.1	-0.4127	0.0425469	6.28536e-21	25881.3	3.59037	0.188911	1.34907e-78	5100.66	0.683472	0.196036	0.00141865	Gran-specific TNF	Conserved diff
ENSG00000126070	AGO3	2793.23	0.0469415	0.0706054	0.737311	4531.14	-0.0316813	0.0511159	0.697309	3484.68	0.901034	0.209197	7.08768e-05	2505.88	0.125306	0.224223	0.677346	NA	ATRA-specific
ENSG00000116863	ADPRHL2	600.406	-0.149146	0.0966049	0.338702	427.335	0.325103	0.106341	0.00837643	2149.49	0.0399762	0.20381	0.901911	2199.13	0.135249	0.244714	0.680601	Gran-specific TNF	NA
ENSG00000116871	MAP7D1	1840.31	-0.0968706	0.0753512	0.451872	2117.26	0.552843	0.0667597	1.94928e-15	5740.33	0.263482	0.162556	0.190654	7543.91	0.945165	0.216851	4.79716e-05	Gran-specific TNF	TPA-specific
ENSG00000214193	SH3D21	90.9276	0.237726	0.217782	0.542732	139.725	0.841705	0.175043	9.86572e-06	252.517	1.05635	0.253796	0.000129529	190.19	0.436973	0.249567	0.138015	Gran-specific TNF	ATRA-specific
ENSG00000196182	STK40	1519.56	-0.111683	0.0849306	0.438357	2397.07	0.964611	0.0648917	2.54e-48	4556.08	0.467892	0.112545	0.000132049	9168.41	1.94673	0.173286	4.31668e-28	Gran-specific TNF	Conserved diff
ENSG00000116898	MRPS15	2339.71	-0.0471788	0.0713802	0.738183	1009.8	-0.0757277	0.0786998	0.513999	5622.49	-0.707577	0.226068	0.00527901	4972.06	-1.17925	0.24475	5.96086e-06	NA	Conserved diff
ENSG00000119535	CSF3R	533.578	-0.443672	0.104575	0.000323972	1100.12	-0.301178	0.0766212	0.000423114	10559.4	1.40366	0.128781	2.54753e-26	3821.42	-1.57005	0.130392	3.96281e-32	Conserved TNF	Opposite diff
ENSG00000163874	ZC3H12A	981.135	1.97618	0.0977546	2.84751e-88	1574.56	2.68387	0.078993	1.4672e-250	1162.32	0.688024	0.138754	3.67703e-06	1989.57	1.81778	0.166754	1.68452e-26	Conserved TNF	Conserved diff
ENSG00000163877	SNIP1	1004.52	0.115049	0.0809737	0.391803	724.274	0.0722806	0.0869941	0.583893	1447.18	0.113127	0.117006	0.474024	1594.16	0.401315	0.16227	0.0287528	NA	TPA-specific
ENSG00000134697	GNL2	3797.34	0.0938092	0.0609084	0.340681	1897.08	0.195507	0.0584784	0.00342115	5120.85	-0.626885	0.144312	6.06982e-05	5043.04	-0.639884	0.171864	0.000607192	Gran-specific TNF	Conserved diff
ENSG00000116922	C1orf109	854.897	-0.0428957	0.0802202	0.790397	291.78	0.114511	0.117891	0.508862	1142.33	-1.29131	0.122661	1.29712e-24	1343.06	-0.56393	0.148042	0.000440336	NA	Conserved diff
ENSG00000134690	CDCA8	2472.01	-0.0656609	0.0658597	0.587341	1176.72	0.143669	0.0688775	0.0945743	4302.99	-0.647121	0.154044	0.000110506	2954.5	-2.85231	0.19503	5.79701e-47	NA	Conserved diff
ENSG00000185090	MANEAL	207.195	0.0111732	0.162413	0.976463	211.943	0.67341	0.144528	1.97465e-05	245.002	-0.122293	0.152762	0.564069	248.277	-0.0521953	0.214385	0.865648	Gran-specific TNF	NA
ENSG00000196449	YRDC	1203.1	0.324459	0.0741831	0.000189381	921.46	0.89554	0.0742354	5.16452e-32	1839.15	-0.292412	0.181671	0.194428	2363.49	0.44497	0.214323	0.0721994	Conserved TNF	NA
ENSG00000197982	C1orf122	342.367	-0.0721827	0.150471	0.811596	596.448	1.45878	0.102872	5.11463e-44	1400.08	0.01969	0.277347	0.965596	2003.17	0.935012	0.297571	0.00437911	Gran-specific TNF	TPA-specific
ENSG00000188786	MTF1	1787.6	0.776163	0.0688223	1.51659e-27	4967.11	1.8208	0.0529289	7.3324e-257	3184.06	1.62862	0.182127	5.36075e-18	3637.05	1.90172	0.191575	3.89446e-22	Conserved TNF	Conserved diff
ENSG00000204084	INPP5B	1951.51	0.00711223	0.0699038	0.964778	4305.37	0.2854	0.0501034	1.04943e-07	5152.89	0.954581	0.097605	2.34822e-21	4039.95	0.414138	0.121323	0.00181746	Gran-specific TNF	Conserved diff
ENSG00000183431	SF3A3	6851.25	0.0428083	0.0534806	0.674711	3245.73	0.116457	0.0522289	0.0702033	12295.8	-0.605319	0.172592	0.00153613	11383.7	-0.856575	0.179349	7.2749e-06	NA	Conserved diff
ENSG00000183386	FHL3	687.75	-0.180383	0.0918719	0.184906	594.663	0.871779	0.0931211	1.54247e-19	2403.7	-0.60355	0.181537	0.00283787	4634.65	1.15986	0.206744	1.00447e-07	Gran-specific TNF	Opposite diff
ENSG00000183520	UTP11	2558.45	0.142542	0.0612678	0.0979416	1076.48	0.203971	0.0713808	0.0148547	3529.27	-0.70952	0.206169	0.00192527	3800.87	-0.405284	0.230175	0.135545	Gran-specific TNF	ATRA-specific
ENSG00000116954	RRAGC	418.139	-0.04903	0.111039	0.828505	490.592	0.456866	0.0942512	8.19846e-06	1100.67	0.123043	0.236793	0.723705	1389.71	0.736655	0.26313	0.012069	Gran-specific TNF	TPA-specific
ENSG00000214114	MYCBP	1555.37	0.0725055	0.0697522	0.568159	849.066	-0.37189	0.0791942	1.66844e-05	2598.85	-0.523601	0.216477	0.0373278	2423.79	-0.73946	0.236628	0.00461589	Gran-specific TNF	Conserved diff
ENSG00000174574	AKIRIN1	3303.8	0.175314	0.0612799	0.0296976	3765.04	0.421052	0.0508814	2.04294e-15	8171.13	0.382059	0.112199	0.0021743	10780.4	1.05389	0.150002	1.44921e-11	Conserved TNF	Conserved diff
ENSG00000168653	NDUFS5	3468.27	-0.0832662	0.092685	0.633806	1818.1	0.214066	0.0650969	0.00408856	7572.71	-0.870332	0.284206	0.00649839	7902.11	-0.663705	0.305515	0.0584336	Gran-specific TNF	ATRA-specific
ENSG00000127603	MACF1	12929.3	0.392184	0.0650655	4.48321e-08	31100.7	0.504229	0.0478443	1.39281e-24	28172.8	0.729107	0.325293	0.0565752	27429.7	0.700957	0.330988	0.0659579	Conserved TNF	NA
ENSG00000182109	AL365277.1	979.087	0.151068	0.106218	0.391545	633.319	0.3453	0.0852986	0.000267468	1799.17	-0.869897	0.201966	7.08768e-05	1806.64	-0.800419	0.256911	0.00475072	Gran-specific TNF	Conserved diff
ENSG00000090621	PABPC4	5466.76	-0.0227548	0.0563645	0.842437	2220.55	0.297549	0.0564898	1.02986e-06	7830.62	-1.00255	0.0931186	1.06201e-25	9360.94	-0.296098	0.131204	0.0483021	Gran-specific TNF	Conserved diff
ENSG00000084072	PPIE	1807.93	0.0990355	0.0684556	0.379594	1070.27	0.0559733	0.0838494	0.672555	3954.3	-0.555123	0.170605	0.00357142	3829.13	-0.62961	0.183106	0.00167079	NA	Conserved diff
ENSG00000043514	TRIT1	1401.35	0.0232525	0.076218	0.885148	590.507	0.319006	0.0866597	0.00107311	2202.29	-1.15051	0.1718	1.72768e-10	2537.43	-0.5342	0.188991	0.0111867	Gran-specific TNF	Conserved diff
ENSG00000168389	MFSD2A	915.751	0.916101	0.0797836	1.54201e-28	419.972	3.6617	0.144599	2.65146e-139	495.931	-2.19754	0.133878	8.73381e-59	1443.77	1.37349	0.146025	5.71454e-20	Conserved TNF	Opposite diff
ENSG00000228477	AL663070.1	82.8152	1.03684	0.241589	0.000264625	36.8058	3.40098	0.420384	9.04131e-15	51.3332	-0.795476	0.279294	0.01216	73.5358	0.371914	0.312833	0.338105	Conserved TNF	ATRA-specific
ENSG00000131236	CAP1	8018.9	-0.0359141	0.0534864	0.734411	19596.6	0.0752087	0.0412815	0.156705	20743.8	1.90592	0.212567	4.33429e-18	32828.4	2.72539	0.228832	1.87281e-31	NA	Conserved diff
ENSG00000131238	PPT1	3781.25	-0.00913323	0.0664676	0.950031	2055.93	-0.0499585	0.0602025	0.584416	7281.41	-0.139664	0.158641	0.519544	11187.6	0.975029	0.200397	4.75082e-06	NA	TPA-specific
ENSG00000117000	RLF	1460.21	0.236984	0.0767123	0.0160289	1304.95	0.180724	0.0643842	0.017097	1961.69	0.319298	0.164212	0.105778	2207.21	0.643818	0.168545	0.000423177	Conserved TNF	TPA-specific
ENSG00000259943	AL050341.2	92.916	-0.354623	0.211269	0.283411	80.3311	0.2182	0.229786	0.520354	332.692	-0.34422	0.203168	0.168329	282.751	-0.898931	0.213962	9.33433e-05	NA	TPA-specific
ENSG00000084073	ZMPSTE24	3604.07	0.159558	0.0645069	0.0725342	2307.98	0.00499291	0.058163	0.962534	4554.04	-0.0528749	0.134902	0.796473	5664.71	0.558322	0.165676	0.00210467	NA	TPA-specific
ENSG00000049089	COL9A2	80.5514	1.97672	0.252437	2.16625e-13	700.181	0.873365	0.0810897	1.20523e-25	1830.98	2.37435	0.1977	8.77101e-32	2233.66	2.72948	0.219885	4.34894e-34	Conserved TNF	Conserved diff
ENSG00000084070	SMAP2	2410.21	0.158284	0.0698692	0.109809	2743.64	0.454824	0.0547889	1.65091e-15	7022.37	0.422072	0.118451	0.00126198	10476.1	1.34186	0.178583	4.33084e-13	Gran-specific TNF	Conserved diff
ENSG00000187801	ZFP69B	68.0114	0.122369	0.266301	0.821514	79.0864	0.793063	0.229374	0.00233713	44.0611	0.174518	0.31874	0.707563	153.997	2.70013	0.266135	4.40463e-23	Gran-specific TNF	TPA-specific
ENSG00000260920	AL031985.3	71.3403	0.558275	0.2415	0.100928	80.9002	0.524376	0.228694	0.0608356	51.2472	0.126799	0.288825	0.771412	155.093	2.43071	0.253077	8.79637e-21	NA	TPA-specific
ENSG00000117010	ZNF684	224.351	0.392597	0.153619	0.0611022	109.437	0.151752	0.191675	0.606067	200.471	-0.893413	0.188312	1.02195e-05	216.896	-0.548477	0.20306	0.0158719	NA	Conserved diff
ENSG00000117016	RIMS3	56.0053	0.00400677	0.272849	0.99482	43.6418	0.904031	0.294317	0.00801555	171.545	-1.89154	0.173612	2.67011e-26	207.47	-0.852166	0.1742	4.18808e-06	Gran-specific TNF	Conserved diff
ENSG00000272145	NFYC-AS1	110.441	0.0865353	0.203743	0.833689	87.8116	0.0513789	0.206233	0.888154	89.2007	-0.418695	0.349572	0.357703	67.5195	-1.53301	0.386324	0.000239662	NA	TPA-specific
ENSG00000066136	NFYC	1577.84	0.018149	0.0671871	0.899567	2016.07	-0.216206	0.0611776	0.00180089	4012.65	0.616318	0.0907108	9.00627e-11	3503.31	0.308656	0.138473	0.0515019	Gran-specific TNF	ATRA-specific
ENSG00000179862	CITED4	111.294	0.343683	0.222618	0.338702	6.35728	-0.135558	0.86164	0.93254	278.687	-4.45347	0.32983	5.51738e-40	302.203	-2.78047	0.3525	2.49552e-14	NA	Conserved diff
ENSG00000171793	CTPS1	4631.48	0.115393	0.056379	0.1623	1873.96	0.144956	0.0580156	0.0376671	5018.5	-1.47099	0.148558	7.18998e-22	4595.04	-1.93957	0.188238	8.94829e-24	Gran-specific TNF	Conserved diff
ENSG00000281207	SLFNL1-AS1	457.361	-0.0428915	0.114249	0.854827	240.768	0.264547	0.136739	0.127621	172.098	-1.28871	0.339198	0.00053459	139.156	-2.66312	0.415338	8.52498e-10	NA	Conserved diff
ENSG00000010803	SCMH1	2298.64	0.101941	0.0714885	0.389497	1147.24	0.191244	0.0783085	0.0431623	3273.06	-0.812894	0.158381	1.55716e-06	2690.73	-1.7026	0.171629	4.15367e-22	Gran-specific TNF	Conserved diff
ENSG00000127124	HIVEP3	2009.83	0.503664	0.0864768	1.47931e-07	14004.4	0.987149	0.0647091	7.21484e-51	7880.2	3.84166	0.23999	6.16752e-56	8454.41	3.97116	0.247454	2.2302e-56	Conserved TNF	Conserved diff
ENSG00000066185	ZMYND12	23.847	-0.510984	0.419056	0.485071	37.7191	-0.902273	0.322466	0.0174923	119.116	0.386836	0.259062	0.23501	87.0056	-0.5139	0.292178	0.135969	Gran-specific TNF	NA
ENSG00000127125	PPCS	720.605	-0.12838	0.0881484	0.374908	1270.39	-0.297318	0.0644985	2.47451e-05	2949.16	0.538325	0.199321	0.0182424	2654.02	0.300587	0.220083	0.262605	Gran-specific TNF	ATRA-specific
ENSG00000186409	CCDC30	72.9991	-0.114455	0.246151	0.818837	177.805	-0.722019	0.173113	0.000162971	128.976	0.309126	0.17866	0.157896	133.347	0.430798	0.179561	0.0345181	Gran-specific TNF	TPA-specific
ENSG00000171960	PPIH	2538.25	-0.0374308	0.0754431	0.80547	896.006	-0.0762367	0.0743672	0.481506	4457.95	-1.3237	0.242143	2.73484e-07	3954.82	-1.97078	0.261214	3.4501e-13	NA	Conserved diff
ENSG00000234917	AC098484.2	23.1894	-0.328054	0.438386	0.698329	14.2212	0.0589182	0.515792	0.950736	30.658	-1.03603	0.317985	0.00352286	25.7789	-1.95449	0.403329	5.21807e-06	NA	Conserved diff
ENSG00000065978	YBX1	43416	-0.0405202	0.0608907	0.737311	18513.1	0.236167	0.0465995	2.82556e-06	79653.1	-0.88905	0.163641	3.27106e-07	76569	-1.00674	0.206947	4.76738e-06	Gran-specific TNF	Conserved diff
ENSG00000117385	P3H1	1349.2	-0.106808	0.0718508	0.362785	1299.48	-0.26061	0.068167	0.000635753	4786.56	0.180915	0.107678	0.172547	4784.48	0.212282	0.148292	0.237298	Gran-specific TNF	NA
ENSG00000274386	TMEM269	64.536	-0.0283985	0.247522	0.958317	68.5823	-0.572591	0.246191	0.0564454	89.7415	0.329437	0.187433	0.150424	99.7338	0.624045	0.207496	0.00659397	NA	TPA-specific
ENSG00000177868	SVBP	302.561	-0.003776	0.142541	0.991729	341.71	-0.0884928	0.11527	0.619461	772.641	0.223368	0.264059	0.539176	567.978	-0.71348	0.282169	0.0250393	NA	TPA-specific
ENSG00000164010	ERMAP	185.259	0.0405136	0.152727	0.901023	545.814	-0.483044	0.090481	7.10825e-07	794.64	1.56536	0.0991832	2.15178e-54	501.78	0.616012	0.118806	9.70158e-07	Gran-specific TNF	Conserved diff
ENSG00000164011	ZNF691	360.333	0.0818219	0.116683	0.720047	306.901	-0.109255	0.11334	0.513125	713.826	-0.188123	0.180207	0.433874	583.295	-0.857932	0.196279	4.55013e-05	NA	TPA-specific
ENSG00000117394	SLC2A1	2278.89	-0.172571	0.0725136	0.0879085	2003.02	-1.87196	0.0702217	2.49003e-154	3684.14	-0.0126143	0.118665	0.947524	3222.3	-0.388621	0.185641	0.0695572	Gran-specific TNF	NA
ENSG00000117395	EBNA1BP2	5525.26	-0.0461855	0.054522	0.65485	979.556	0.12319	0.0725198	0.193687	5456.91	-1.95544	0.238423	2.79711e-15	5318.11	-2.06316	0.265002	5.51141e-14	NA	Conserved diff
ENSG00000117399	CDC20	5039.4	-0.205707	0.0712965	0.028	1859.82	-0.431935	0.0691389	4.07229e-09	5364.44	-0.467932	0.166536	0.0135441	3377.41	-3.35875	0.215795	4.43643e-53	Conserved TNF	Conserved diff
ENSG00000198198	SZT2	2349.9	0.0206642	0.074587	0.896759	3656.72	0.144289	0.0543125	0.0254824	5293.41	0.775484	0.330099	0.0441096	4515.49	0.429969	0.332687	0.293372	Gran-specific TNF	ATRA-specific
ENSG00000142949	PTPRF	272.045	-0.27676	0.144602	0.20016	21.9018	0.663302	0.415726	0.227962	491.348	-1.63955	0.217084	4.28832e-13	372.286	-6.10032	0.314714	7.36102e-82	NA	Conserved diff
ENSG00000066135	KDM4A	1910.81	0.0768598	0.0728206	0.560999	2250.69	-0.324442	0.0551605	3.63937e-08	5126.08	0.087116	0.124077	0.620057	4803.67	-0.0637277	0.1479	0.753512	Gran-specific TNF	NA
ENSG00000236200	KDM4A-AS1	140.839	0.585941	0.177563	0.00887701	36.9726	1.65882	0.334179	4.67977e-06	107.05	-0.79804	0.242462	0.00316444	106.227	-0.771008	0.277261	0.0127272	Conserved TNF	Conserved diff
ENSG00000117408	IPO13	1581.05	-0.066066	0.0880376	0.697474	890.566	-0.147728	0.0729717	0.106882	2874.73	-0.578135	0.088092	4.15852e-10	3169.1	-0.211488	0.131718	0.178354	NA	ATRA-specific
ENSG00000132768	DPH2	3167.42	-0.0524361	0.0699161	0.697478	732.183	-0.0549124	0.0845626	0.682107	4583.54	-1.68759	0.124339	2.14509e-40	4845.98	-1.31421	0.167039	2.91497e-14	NA	Conserved diff
ENSG00000117410	ATP6V0B	4992.73	0.0523206	0.0734182	0.715014	4639.77	0.148601	0.0547655	0.0219533	14946.6	0.255267	0.216166	0.365864	19769.8	0.951486	0.247186	0.00037837	Gran-specific TNF	TPA-specific
ENSG00000117411	B4GALT2	1097.96	-0.187252	0.0955984	0.186497	90.0906	0.232783	0.21441	0.450661	1751.28	-2.45697	0.191365	3.15525e-36	1543.43	-4.21663	0.235356	4.67365e-70	NA	Conserved diff
ENSG00000159214	CCDC24	27.4041	0.0265973	0.374275	0.975389	22.8509	0.660477	0.411932	0.225117	101.455	-0.718879	0.175572	0.000170783	109.528	-0.397594	0.197384	0.082453	NA	ATRA-specific
ENSG00000196517	SLC6A9	52.2953	-0.316327	0.295144	0.552534	4.36368	1.64824	1.0286	0.225401	291.339	-0.991775	0.208969	1.01434e-05	249.574	-1.72032	0.185666	2.08503e-19	NA	Conserved diff
ENSG00000178028	DMAP1	993.951	0.0288166	0.0774854	0.856142	1009.22	0.00644555	0.0694519	0.959767	3268.33	0.131795	0.168869	0.575369	2685.08	-0.430737	0.180149	0.035204	NA	TPA-specific
ENSG00000117419	ERI3	1749.51	-0.0760083	0.0745357	0.577228	581.914	-0.158548	0.0892983	0.169867	2439	-1.33602	0.166364	1.09865e-14	2366.59	-1.43273	0.199454	4.80222e-12	NA	Conserved diff
ENSG00000187147	RNF220	2310.79	-0.106234	0.0653851	0.304728	1476.32	-0.0654132	0.0614741	0.462121	4859.65	-0.400415	0.150094	0.0199328	4866.76	-0.356721	0.182723	0.0936352	NA	ATRA-specific
ENSG00000126106	TMEM53	124.881	-0.550059	0.184636	0.0217972	345.443	-0.681728	0.119629	1.03475e-07	747.735	0.970264	0.162637	1.65158e-08	817.336	1.18292	0.210497	9.5241e-08	Conserved TNF	Conserved diff
ENSG00000198520	C1orf228	2468.84	-0.154608	0.0780229	0.180159	1549.73	-0.220206	0.0707129	0.00702846	14423.5	-0.855755	0.214539	0.000258585	18474.5	0.0161636	0.225663	0.961171	Gran-specific TNF	ATRA-specific
ENSG00000200169	RNU5D-1	70.3784	-0.16593	0.280015	0.766786	85.237	0.988756	0.212534	2.03909e-05	1.83769	-1.29336	1.12316	0.380085	3.55666	0.859925	0.869358	0.435915	Gran-specific TNF	NA
ENSG00000142945	KIF2C	3231.23	-0.0796003	0.0577732	0.410122	1470.6	-0.111895	0.0607607	0.151293	5744.64	-0.495002	0.169964	0.0101254	3846.77	-2.6603	0.205128	3.94503e-37	NA	Conserved diff
ENSG00000225721	AL592166.1	42.7856	-0.304126	0.374469	0.670042	31.4173	0.84439	0.342191	0.0406224	20.6971	-0.324086	0.502076	0.652787	13.4734	-2.40447	0.658182	0.000783662	Gran-specific TNF	TPA-specific
ENSG00000200913	SNORD46	173.698	-0.0332546	0.182339	0.934064	31.8715	0.336389	0.351111	0.515842	19.7992	-0.740034	0.343947	0.0688856	18.1297	-1.07158	0.424593	0.0253361	NA	TPA-specific
ENSG00000173846	PLK3	322.798	0.544656	0.123709	0.000167634	1282.84	3.61003	0.0876521	0	617.118	0.589907	0.155637	0.00055343	1021.33	1.67653	0.167636	1.87932e-22	Conserved TNF	Conserved diff
ENSG00000222009	BTBD19	40.3177	0.742282	0.316001	0.0936092	438.317	3.22335	0.122982	3.49534e-149	412.587	2.94589	0.242572	1.73473e-32	136.681	0.951874	0.3051	0.00468984	Gran-specific TNF	Conserved diff
ENSG00000117425	PTCH2	61.5999	-0.327349	0.265642	0.478705	35.162	-0.239786	0.323234	0.632274	128.183	-0.72192	0.221917	0.0035785	128.698	-0.651952	0.252751	0.0219748	NA	Conserved diff
ENSG00000070785	EIF2B3	1503.66	0.0527557	0.0681052	0.686164	397.627	-0.0635838	0.106012	0.708645	1814.08	-1.62239	0.226242	6.81462e-12	1958.51	-1.16467	0.253429	1.6811e-05	NA	Conserved diff
ENSG00000126107	HECTD3	883.854	-0.184363	0.0858801	0.136273	1204.79	0.449435	0.0647341	4.43678e-11	2694.19	0.252174	0.102572	0.0338965	2842.38	0.422629	0.130971	0.00335546	Gran-specific TNF	Conserved diff
ENSG00000126088	UROD	2201.13	-0.0252118	0.0739808	0.869643	921.464	0.0739586	0.08112	0.539772	5146.95	-1.01096	0.242239	0.000123751	5223.61	-0.902106	0.262301	0.00166681	NA	Conserved diff
ENSG00000186603	HPDL	1146.47	-0.087171	0.0813608	0.552693	49.7322	-0.872792	0.281985	0.00746456	1811.07	-2.70613	0.15098	5.77022e-70	1604.73	-4.88612	0.203988	1.21441e-124	Gran-specific TNF	Conserved diff
ENSG00000132781	MUTYH	279.099	-0.0265554	0.127487	0.923588	250.146	-0.085692	0.123474	0.658552	942.644	-0.260499	0.170286	0.221637	798.403	-0.805477	0.186924	5.93047e-05	NA	TPA-specific
ENSG00000132773	TOE1	936.578	-0.0327442	0.093269	0.8655	502.768	-0.0565002	0.0967358	0.71712	1678.84	-0.564242	0.146745	0.000450792	1410.99	-1.23357	0.195098	1.49814e-09	NA	Conserved diff
ENSG00000070759	TESK2	75.1535	0.356739	0.241098	0.365647	105.746	-0.089312	0.185574	0.773382	625.761	-0.553796	0.127296	5.90451e-05	1065.27	0.924672	0.155356	1.42487e-08	NA	Opposite diff
ENSG00000280670	CCDC163	102.872	-0.453639	0.209863	0.132569	27.3176	-0.752816	0.378345	0.114647	223.05	-0.983631	0.162353	9.55077e-09	179.553	-2.14178	0.188755	1.22211e-28	NA	Conserved diff
ENSG00000132763	MMACHC	1082.2	-0.346614	0.0822939	0.000366688	289.843	-0.700979	0.121546	7.01443e-08	1179.1	-1.49842	0.122716	7.79606e-33	1107.39	-1.79901	0.140706	4.11623e-36	Conserved TNF	Conserved diff
ENSG00000117450	PRDX1	9453.18	0.0458193	0.0653625	0.720047	1353.45	0.588688	0.0697563	5.28496e-16	7298.42	-2.19835	0.225326	2.95342e-21	11403.6	-0.113799	0.253183	0.742456	Gran-specific TNF	ATRA-specific
ENSG00000117448	AKR1A1	1492.53	-0.0372234	0.0744659	0.803623	1001.02	0.360119	0.0712981	3.07292e-06	4986.11	-0.946884	0.226321	0.000118559	5542.04	-0.500549	0.24606	0.0790754	Gran-specific TNF	ATRA-specific
ENSG00000132780	NASP	14084.8	0.0418947	0.0517504	0.670947	4279.95	-0.213902	0.0470033	3.22571e-05	24145.5	-1.30859	0.18501	1.35459e-11	19537.8	-2.74724	0.191145	2.18237e-45	Gran-specific TNF	Conserved diff
ENSG00000159596	TMEM69	1171.79	0.349817	0.0797119	0.000178564	881.544	-0.0297517	0.0795736	0.82683	3723.77	-0.501535	0.15997	0.00519286	3526.89	-0.654927	0.189488	0.00157311	Pro-specific TNF	Conserved diff
ENSG00000197429	IPP	51.9042	0.000761522	0.282953	0.999351	107.081	-0.0132424	0.191967	0.969765	85.6145	1.0747	0.194928	2.12748e-07	153.203	2.21023	0.183096	2.76003e-32	NA	Conserved diff
ENSG00000086015	MAST2	961.307	-0.175566	0.0956177	0.226358	775.044	0.207069	0.0860444	0.0468926	1917.04	-0.338645	0.161616	0.077686	2203.67	0.118831	0.178085	0.613849	Gran-specific TNF	NA
ENSG00000117461	PIK3R3	480.859	-0.216391	0.105693	0.162249	1192.42	-1.20529	0.0704977	9.4154e-64	2266.23	1.21886	0.131795	3.41378e-19	1290.03	-0.123991	0.144619	0.506077	Gran-specific TNF	ATRA-specific
ENSG00000085998	POMGNT1	509.203	0.114053	0.102986	0.536379	498.644	0.393778	0.0941764	0.000156305	1629.66	0.344791	0.120976	0.0121013	2082.88	0.952875	0.176911	3.39625e-07	Gran-specific TNF	Conserved diff
ENSG00000085999	RAD54L	2219.21	0.0251918	0.0625363	0.842694	657.502	0.15951	0.0825731	0.128312	2110.3	-1.08395	0.107723	1.48672e-22	1505.57	-3.98611	0.139371	2.01875e-177	NA	Conserved diff
ENSG00000132128	LRRC41	1310.6	0.0042107	0.0820511	0.983133	1331.34	0.0742208	0.0690582	0.456763	3695.8	0.210796	0.0855126	0.0333641	4084.7	0.500662	0.143697	0.00142929	NA	Conserved diff
ENSG00000173660	UQCRH	7401.81	-0.0812043	0.0831268	0.595828	4553.78	0.0983658	0.0559229	0.174712	21927.1	-0.759057	0.274489	0.0153477	19419.3	-1.23835	0.292905	8.36011e-05	NA	Conserved diff
ENSG00000117481	NSUN4	1527.11	0.180957	0.0731121	0.0723291	1286.7	0.319305	0.0664884	1.01483e-05	2526.54	-0.0837849	0.0868379	0.475121	2246.27	-0.416008	0.108822	0.000418396	Gran-specific TNF	TPA-specific
ENSG00000117480	FAAH	101.924	0.257953	0.236088	0.542578	188.172	0.192804	0.157999	0.384573	472.132	0.99703	0.163923	8.29891e-09	415.38	0.737194	0.169448	4.96637e-05	NA	Conserved diff
ENSG00000079277	MKNK1	1149.76	0.0607597	0.0734568	0.66343	4506.16	0.224552	0.0499662	4.13504e-05	4784.63	1.4085	0.100634	6.47419e-43	4982.95	1.51314	0.0961193	2.80445e-54	Gran-specific TNF	Conserved diff
ENSG00000142961	MOB3C	300.346	0.938797	0.128458	1.05903e-11	1620.79	1.49317	0.0748223	1.15111e-86	1276.89	1.58674	0.121002	9.30857e-38	1919.94	2.34854	0.141437	2.66113e-60	Conserved TNF	Conserved diff
ENSG00000123472	ATPAF1	1516.65	0.0583025	0.0692443	0.657163	945.712	-0.0781542	0.0737586	0.464631	3137.54	-0.207383	0.180964	0.382917	2647.09	-0.755254	0.205213	0.000710127	NA	TPA-specific
ENSG00000159658	EFCAB14	4102.23	0.0500674	0.06488	0.68788	5431.49	0.0721148	0.0490708	0.275209	8164.62	0.903467	0.13967	7.65717e-10	9235.87	1.19493	0.16195	1.17597e-12	NA	Conserved diff
ENSG00000123473	STIL	2576.38	0.0712306	0.0614095	0.511782	1561.78	0.0392644	0.0609749	0.685212	2615.5	-0.239054	0.148385	0.193902	1765.07	-1.92828	0.15593	7.73751e-34	NA	TPA-specific
ENSG00000162368	CMPK1	5214.99	0.0250595	0.0658544	0.852753	3395.12	-0.0632949	0.059117	0.458857	10321.8	-0.403161	0.156723	0.025551	11748.5	0.0320374	0.185986	0.906892	NA	ATRA-specific
ENSG00000237424	FOXD2-AS1	176.503	-0.0805944	0.156261	0.797795	166.076	0.20159	0.153701	0.342092	438.723	-0.955892	0.134179	9.47142e-12	385.987	-1.51839	0.159844	2.38581e-20	NA	Conserved diff
ENSG00000185104	FAF1	2798.38	0.0083006	0.061732	0.951038	1892.75	-0.0735093	0.0561769	0.343541	4687.41	-0.572178	0.179133	0.00432096	4193.93	-0.960795	0.201048	7.1803e-06	NA	Conserved diff
ENSG00000123080	CDKN2C	1391.68	0.105008	0.0805904	0.444043	1356.47	-0.266699	0.0624097	0.000106585	4002.63	0.286859	0.193955	0.240306	2361.54	-1.62379	0.227294	6.32596e-12	Gran-specific TNF	TPA-specific
ENSG00000123091	RNF11	1208.96	0.225738	0.0720695	0.0143156	1940.1	0.183707	0.0569671	0.00499681	3272.79	1.3774	0.14392	1.72489e-20	5370.04	2.31425	0.17984	1.43372e-36	Conserved TNF	Conserved diff
ENSG00000085831	TTC39A	23.1974	2.02167	0.45418	0.000136307	22.5514	0.824226	0.433503	0.135714	15.9824	2.07097	0.413542	2.89792e-06	25.7388	2.90272	0.404788	5.23596e-12	Pro-specific TNF	Conserved diff
ENSG00000085832	EPS15	3291.38	0.121722	0.0691643	0.253625	3629.36	0.0274216	0.0519663	0.74791	4618.53	0.380622	0.127656	0.00827677	4322.73	0.241154	0.150738	0.180182	NA	ATRA-specific
ENSG00000198841	KTI12	637.039	-0.169789	0.102897	0.294681	371.426	-0.224113	0.108988	0.100454	1513.16	-1.04316	0.211701	4.27606e-06	1483.54	-1.08217	0.250661	5.72976e-05	NA	Conserved diff
ENSG00000134717	BTF3L4	3006.07	0.0647486	0.0745009	0.64561	2452.5	-0.413421	0.0523437	4.13235e-14	7491.59	-0.018464	0.140774	0.934802	7343.24	-0.0421299	0.169731	0.862892	Gran-specific TNF	NA
ENSG00000157077	ZFYVE9	635.914	0.0309241	0.0986527	0.881313	333.504	1.21233	0.116249	4.41086e-24	572.081	-0.908718	0.183154	3.62685e-06	702.447	-0.141728	0.18672	0.561924	Gran-specific TNF	ATRA-specific
ENSG00000154222	CC2D1B	893.632	0.00368781	0.0870478	0.98616	1938.06	0.532254	0.0558506	3.202e-20	2522.95	1.18884	0.092394	2.20905e-36	3048.06	1.59007	0.126781	8.91368e-35	Gran-specific TNF	Conserved diff
ENSG00000085840	ORC1	3126.69	-0.115718	0.0674016	0.269249	1047.52	-0.124112	0.0696762	0.168188	5243.51	-1.01575	0.141309	6.0467e-12	3791.08	-3.40774	0.167302	2.53738e-90	NA	Conserved diff
ENSG00000134748	PRPF38A	3689.49	0.0804212	0.0578978	0.404994	3157.72	-0.112177	0.0535543	0.0929386	7612.71	0.0704869	0.146515	0.746148	6391.4	-0.431442	0.17792	0.0323954	NA	TPA-specific
ENSG00000134744	ZCCHC11	2320.04	-0.0461012	0.0706016	0.74189	3317.4	-0.750192	0.0507961	1.04389e-47	5926.78	0.71591	0.209514	0.00208985	3844.46	-0.439483	0.214633	0.0768308	Gran-specific TNF	ATRA-specific
ENSG00000162377	COA7	2960.45	-0.0966871	0.0609309	0.321183	722.014	-0.0355642	0.0809185	0.793998	4333.03	-1.50502	0.131399	5.54709e-29	4205.04	-1.60427	0.163708	1.35251e-21	NA	Conserved diff
ENSG00000162378	ZYG11B	900.151	-0.301897	0.0883954	0.00622139	711.646	-0.794157	0.0883122	4.44202e-18	1456.9	0.148234	0.193382	0.582838	1739.46	0.632844	0.196414	0.0034059	Conserved TNF	TPA-specific
ENSG00000116171	SCP2	2166.31	0.0589371	0.0662791	0.63762	3186.86	-0.115721	0.0588502	0.120137	6884.13	0.562883	0.176277	0.00433411	6050.74	0.265902	0.206638	0.295733	NA	ATRA-specific
ENSG00000157184	CPT2	726.605	0.00869505	0.0850102	0.964717	1050.19	-0.263614	0.0705338	0.000874626	1381.85	0.66532	0.113157	2.73332e-08	1076.24	0.0549303	0.160479	0.805706	Gran-specific TNF	ATRA-specific
ENSG00000162384	C1orf123	745.083	-0.0649335	0.0982434	0.738183	550.219	-0.248714	0.102739	0.045318	1985.5	-0.0614593	0.194372	0.838284	1509.87	-0.982974	0.217458	2.36403e-05	Gran-specific TNF	TPA-specific
ENSG00000162385	MAGOH	1404.78	-0.0416089	0.0871832	0.812834	714.933	0.32826	0.0805858	0.000241857	3231.2	-0.828764	0.277054	0.00805255	2942.24	-1.19027	0.294034	0.000174735	Gran-specific TNF	Conserved diff
ENSG00000157193	LRP8	4973.78	-0.0252032	0.0644756	0.847504	1414.06	0.421225	0.0649691	9.37525e-10	5016.85	-1.20308	0.171403	1.96252e-11	6099.03	-0.382056	0.181683	0.0681125	Gran-specific TNF	ATRA-specific
ENSG00000058804	NDC1	6576.51	0.0612373	0.0559582	0.541711	2232.95	-0.170625	0.053661	0.00574795	6967.8	-0.968099	0.134909	6.58763e-12	5579.21	-2.15336	0.156969	1.96728e-41	Gran-specific TNF	Conserved diff
ENSG00000058799	YIPF1	501.197	0.0289273	0.100155	0.891024	670.548	-0.175518	0.0928038	0.138058	1434.16	0.524421	0.198968	0.0216968	1798.68	1.06517	0.22486	8.72869e-06	NA	Conserved diff
ENSG00000081870	HSPB11	869.771	0.0112106	0.0852514	0.952252	1088.09	0.0657232	0.0754436	0.56237	1944.26	-0.305334	0.228003	0.295444	1563.52	-1.08663	0.247407	4.15516e-05	NA	TPA-specific
ENSG00000116212	LRRC42	562.949	-0.238483	0.0958692	0.0704875	426.585	0.606814	0.10324	3.72485e-08	1586.97	-0.651081	0.209193	0.00557216	1598.6	-0.583825	0.234348	0.0274793	Gran-specific TNF	Conserved diff
ENSG00000116209	TMEM59	2162.89	0.00523984	0.0680897	0.972984	3273.92	-0.249519	0.0513468	7.73172e-06	7828.15	0.390944	0.213898	0.132378	8237.15	0.545151	0.233548	0.0403446	Gran-specific TNF	TPA-specific
ENSG00000116205	TCEANC2	771.738	-0.0614492	0.089883	0.727768	718.043	-0.455893	0.0813124	1.70703e-07	1605.03	0.0707766	0.148541	0.749019	1360.32	-0.394502	0.15359	0.022612	Gran-specific TNF	TPA-specific
ENSG00000215883	CYB5RL	537.612	-0.291394	0.109528	0.0481393	256.791	-0.344771	0.125878	0.0205093	1034.55	-0.586718	0.163743	0.00117811	814.741	-1.60113	0.161267	3.83075e-22	Conserved TNF	Conserved diff
ENSG00000116221	MRPL37	4273.93	-0.0551739	0.0609719	0.630769	1470.55	-0.0367218	0.0675874	0.73971	7781.95	-1.22284	0.209099	3.27347e-08	7419.76	-1.40623	0.239791	2.37532e-08	NA	Conserved diff
ENSG00000157216	SSBP3	2783.28	-0.0377494	0.0713706	0.792508	3751.35	0.853792	0.06025	5.8578e-44	6102.75	0.306705	0.123442	0.0317656	6723.89	0.579822	0.181335	0.00367635	Gran-specific TNF	Conserved diff
ENSG00000162390	ACOT11	305.448	-0.389824	0.12448	0.0143368	1555.2	-0.118714	0.0653497	0.158154	1017.33	2.05432	0.134829	9.77902e-51	1174.87	2.33168	0.155958	4.84543e-49	Pro-specific TNF	Conserved diff
ENSG00000162396	PARS2	325.632	-0.343897	0.125602	0.0401871	174.73	-0.262826	0.177623	0.271156	575.542	-0.609305	0.168567	0.00105235	570.289	-0.601464	0.235007	0.0231492	Pro-specific TNF	Conserved diff
ENSG00000116133	DHCR24	5894.01	-0.245715	0.0607273	0.00069357	3111.87	0.0759284	0.052036	0.279527	24783.3	0.482001	0.133779	0.00109743	26622	0.684531	0.183589	0.000595153	Pro-specific TNF	Conserved diff
ENSG00000162600	OMA1	911.54	-0.0678774	0.0866187	0.681593	1021.16	-0.388477	0.0763915	2.59396e-06	1315.5	-0.243859	0.135074	0.137915	1260.06	-0.344216	0.153579	0.0500837	Gran-specific TNF	NA
ENSG00000162601	MYSM1	4701.9	0.220053	0.0698379	0.0136067	4350.3	-0.00995236	0.049446	0.911688	5858.99	0.276944	0.257623	0.418017	5693.31	0.238017	0.269281	0.491354	Pro-specific TNF	NA
ENSG00000177606	JUN	388.234	0.896503	0.121378	5.99945e-12	1987.41	2.44956	0.0759633	9.93069e-226	808.319	0.599039	0.247967	0.0375846	4556.71	3.73931	0.187977	3.53123e-86	Conserved TNF	Conserved diff
ENSG00000172456	FGGY	141.616	-0.351251	0.169426	0.155004	320.208	-0.323216	0.115845	0.017889	147.491	0.732585	0.179941	0.000187642	175.244	1.13194	0.223575	1.80401e-06	Gran-specific TNF	Conserved diff
ENSG00000162599	NFIA	171.6	-0.243754	0.162207	0.355274	33.8532	-1.01411	0.335005	0.00915206	204.997	-2.14456	0.166568	1.99947e-36	180.953	-3.37652	0.216281	2.13702e-53	Gran-specific TNF	Conserved diff
ENSG00000162604	TM2D1	855.627	0.200423	0.0924011	0.130519	1262.26	0.13416	0.0726928	0.150303	1457.82	0.386506	0.159001	0.0362649	1787.52	0.896742	0.185514	5.52553e-06	NA	Conserved diff
ENSG00000162607	USP1	5436.8	0.115606	0.0594968	0.191449	2199.93	-0.194777	0.058289	0.00343752	6898.33	-0.635025	0.158752	0.000247179	5304.85	-1.84057	0.171663	1.14223e-25	Gran-specific TNF	Conserved diff
ENSG00000116641	DOCK7	568.935	0.0827077	0.106846	0.686433	549.422	0.739746	0.0908748	6.07937e-15	728.273	-0.123771	0.179379	0.626994	709.518	-0.164421	0.179831	0.47513	Gran-specific TNF	NA
ENSG00000125703	ATG4C	800.973	-0.0970127	0.0894867	0.546633	783.087	-0.883873	0.0790359	1.35847e-27	1686.79	-0.216334	0.189308	0.384507	1722.98	-0.116609	0.208898	0.677648	Gran-specific TNF	NA
ENSG00000088035	ALG6	1019.07	0.107	0.0820038	0.443114	670.781	-0.234292	0.0915683	0.032554	992.564	-0.319755	0.15944	0.0935992	897.823	-0.625922	0.181364	0.0016002	Gran-specific TNF	TPA-specific
ENSG00000142856	ITGB3BP	1431.06	0.171116	0.0747738	0.105175	584.087	-0.143578	0.0922937	0.242111	1866.86	-1.04111	0.180548	5.21597e-08	1467.21	-2.46283	0.189851	3.77278e-37	NA	Conserved diff
ENSG00000203965	EFCAB7	231.049	0.0235826	0.1421	0.940377	107.676	0.0687272	0.187054	0.829984	251.858	-1.03503	0.13764	5.46709e-13	241.391	-1.17091	0.163525	5.63861e-12	NA	Conserved diff
ENSG00000116652	DLEU2L	54.5045	0.228282	0.26808	0.653095	33.415	-0.162528	0.38674	0.804143	25.3037	-0.554833	0.496132	0.396503	19.0209	-1.79147	0.578122	0.00500317	NA	TPA-specific
ENSG00000079739	PGM1	914.931	-0.218679	0.0933822	0.0949688	200.563	-0.246105	0.144105	0.190538	1383.07	-1.5625	0.213129	2.18462e-12	1351.23	-1.63018	0.200196	3.30423e-15	NA	Conserved diff
ENSG00000162437	RAVER2	658.347	-0.268321	0.0954765	0.0335296	208.096	-1.06857	0.144103	1.57748e-12	947.073	-1.40854	0.130927	1.15904e-25	706.952	-4.61508	0.196664	1.18066e-119	Conserved TNF	Conserved diff
ENSG00000162434	JAK1	2408.94	0.247223	0.0609712	0.000671888	4229.74	0.221192	0.0605269	0.00118012	6755.52	0.944771	0.153335	5.16301e-09	7306.02	1.14033	0.172388	2.30376e-10	Conserved TNF	Conserved diff
ENSG00000162433	AK4	2128.55	-0.0521717	0.0643465	0.670509	78.6844	0.141337	0.217458	0.681852	1756.05	-1.94386	0.259787	7.21006e-13	1500.95	-3.4737	0.202645	3.33846e-64	NA	Conserved diff
ENSG00000213625	LEPROT	751.082	0.111433	0.088741	0.467157	1797.52	-0.329675	0.062294	9.05092e-07	2912.58	1.45387	0.102991	1.20529e-43	3325.2	1.73298	0.13319	2.29402e-37	Gran-specific TNF	Conserved diff
ENSG00000116678	LEPR	34.4692	-0.676378	0.342117	0.181063	93.6812	-1.02287	0.205017	4.15092e-06	170.991	2.03669	0.228195	6.22374e-18	184.747	2.19595	0.236763	1.9169e-19	Gran-specific TNF	Conserved diff
ENSG00000184588	PDE4B	2351.59	2.84373	0.0688974	0	5404.93	3.37365	0.0532148	0	2076.33	1.57637	0.158535	4.80791e-22	822.028	-0.747026	0.168113	3.32396e-05	Conserved TNF	Opposite diff
ENSG00000198160	MIER1	2609.32	0.109635	0.0833737	0.438357	3651.58	-0.0172353	0.0625825	0.875281	3482.97	0.694697	0.139003	3.04209e-06	3192.58	0.517279	0.159086	0.00310214	NA	Conserved diff
ENSG00000162594	IL23R	2305.94	0.091806	0.0700003	0.440347	1267.15	-0.141545	0.064625	0.0763354	2841.15	-0.901267	0.174318	1.28414e-06	2429.8	-1.59854	0.172557	2.11831e-19	NA	Conserved diff
ENSG00000228523	AL389925.1	136.088	0.287202	0.186207	0.339465	69.7759	0.0856403	0.239243	0.834841	16.2937	-1.61281	0.468394	0.00191354	15.6318	-1.78404	0.49591	0.000957004	NA	Conserved diff
ENSG00000081985	IL12RB2	912.904	-0.0238511	0.0867405	0.897414	585.998	-0.339584	0.0897865	0.000741283	1502.1	-0.462963	0.228708	0.0901034	1325.75	-0.877376	0.23895	0.000732534	Gran-specific TNF	TPA-specific
ENSG00000142864	SERBP1	28079	0.0645924	0.0499482	0.447754	9025.71	-0.0827159	0.0431928	0.132338	37328.5	-1.00291	0.148166	1.06955e-10	37147.7	-0.972791	0.180911	3.56303e-07	NA	Conserved diff
ENSG00000116717	GADD45A	270.379	-0.106421	0.128095	0.661738	265.23	0.544836	0.131593	0.000184423	1259.61	-0.773219	0.242835	0.00445904	1028.9	-1.69525	0.265931	1.08019e-09	Gran-specific TNF	Conserved diff
ENSG00000024526	DEPDC1	1816.2	0.204152	0.0714182	0.0298569	901.639	-0.472513	0.0796674	2.7263e-08	1306.79	-0.0538607	0.170826	0.838765	704.167	-3.82358	0.199482	4.66841e-80	Opposite TNF	TPA-specific
ENSG00000066557	LRRC40	1521.6	0.225615	0.0909967	0.0716824	937.531	-0.208338	0.0811674	0.031903	2168.33	-0.288155	0.117255	0.0339792	2259.91	-0.121552	0.145616	0.518688	Gran-specific TNF	ATRA-specific
ENSG00000116754	SRSF11	8687.16	0.282728	0.0628301	0.000112274	5462.66	0.116476	0.0524219	0.0713419	19231.4	-0.382952	0.0941512	0.000190466	20032.4	-0.210294	0.150799	0.251232	Pro-specific TNF	ATRA-specific
ENSG00000118454	ANKRD13C	965.068	0.126358	0.080105	0.324675	973.13	-0.0106161	0.0764278	0.940048	1221.7	0.223959	0.114146	0.102226	1528.35	0.804091	0.144408	1.2672e-07	NA	TPA-specific
ENSG00000116761	CTH	331.173	-0.222398	0.11783	0.209094	59.3283	-0.632557	0.260217	0.0442433	646.117	-1.623	0.20767	5.89309e-14	698.148	-1.15566	0.163291	1.01169e-11	Gran-specific TNF	Conserved diff
ENSG00000132485	ZRANB2	5244.55	0.182209	0.0565687	0.0111583	4532.31	0.0368105	0.0545094	0.668727	9415.48	-0.354282	0.0865399	0.000171228	7819.35	-1.00448	0.111501	2.1289e-18	Pro-specific TNF	Conserved diff
ENSG00000229956	ZRANB2-AS2	49.8814	-0.0159971	0.301896	0.982797	154.284	-0.625407	0.181738	0.00246571	42.8462	1.0221	0.233717	5.36735e-05	28.4045	0.0489496	0.293482	0.909815	Gran-specific TNF	ATRA-specific
ENSG00000162620	LRRIQ3	97.2647	0.200707	0.207736	0.601921	46.7802	-0.277571	0.285597	0.50864	152.471	-0.639128	0.18348	0.00166879	109.664	-2.37631	0.266289	4.49671e-18	NA	Conserved diff
ENSG00000254685	FPGT	369.049	0.0292726	0.114187	0.904587	582.663	-0.677185	0.110746	9.0912e-09	880.793	0.888215	0.122554	3.97852e-12	667.798	0.248048	0.150183	0.164866	Gran-specific TNF	ATRA-specific
ENSG00000116791	CRYZ	633.098	-0.0161386	0.094044	0.93891	180.034	-0.0699829	0.153605	0.78572	1145.71	-1.04008	0.174446	1.68691e-08	1436.24	-0.176334	0.194478	0.47917	NA	ATRA-specific
ENSG00000162623	TYW3	2573.65	0.1603	0.0661476	0.080557	1357.79	-0.223029	0.0635787	0.00196719	3762.05	-0.554509	0.150527	0.000818931	3665.39	-0.605849	0.175914	0.00163955	Gran-specific TNF	Conserved diff
ENSG00000117054	ACADM	2194.44	0.0126799	0.0837696	0.945231	1690	-0.176995	0.0654599	0.0224985	5976.06	-0.0920697	0.151562	0.674653	5902.14	-0.0942287	0.18212	0.701777	Gran-specific TNF	NA
ENSG00000137955	RABGGTB	6059.67	0.259621	0.0619847	0.00040251	3969.37	0.0649761	0.0524641	0.375777	5991.19	-0.537178	0.163332	0.00319081	7834.72	0.304361	0.179121	0.151412	Pro-specific TNF	ATRA-specific
ENSG00000142892	PIGK	1709.53	0.081888	0.0814425	0.583543	1467.9	-0.400302	0.0649137	6.65976e-09	2815.54	0.144326	0.150145	0.47703	2639.13	-0.00453808	0.17121	0.986363	Gran-specific TNF	NA
ENSG00000226084	AC113935.1	118.751	-0.0276794	0.188586	0.946366	82.2981	0.113977	0.219823	0.752323	1171.41	-0.784222	0.352677	0.0587898	1091.45	-1.03766	0.367044	0.0111738	NA	TPA-specific
ENSG00000036549	ZZZ3	2971.77	0.0907301	0.0669273	0.419611	2164.15	-0.375026	0.0584228	1.40821e-09	3323.48	-0.0108784	0.121733	0.956088	3001.49	-0.283259	0.138856	0.0781284	Gran-specific TNF	NA
ENSG00000077254	USP33	2312.41	0.0199508	0.0670282	0.888212	3133.07	-0.286223	0.0519049	2.80783e-07	5501.03	0.622587	0.118558	8.49592e-07	5131.5	0.484703	0.12395	0.000299653	Gran-specific TNF	Conserved diff
ENSG00000180488	MIGA1	991.39	0.0873033	0.0880301	0.5894	1045.1	-0.0672296	0.0709065	0.521272	1265.21	0.519559	0.163701	0.00460515	1396.75	0.784109	0.172888	2.20877e-05	NA	Conserved diff
ENSG00000235613	NSRP1P1	71.63	-0.0911137	0.237249	0.850919	72.9742	0.588305	0.236539	0.0387305	2.89392	-0.481758	0.899964	0.714651	2.67389	-0.689729	1.02958	0.612388	Gran-specific TNF	NA
ENSG00000162614	NEXN	31.2875	-0.256004	0.348589	0.705262	48.3596	-0.875489	0.321625	0.0214848	180.944	1.34886	0.186439	4.35014e-12	77.4379	-0.892894	0.249888	0.00104473	Gran-specific TNF	Opposite diff
ENSG00000162613	FUBP1	8954.91	0.156173	0.0543625	0.0288455	6065.86	0.070972	0.0523344	0.322132	10076.1	-0.13056	0.148372	0.519705	8024.38	-0.877775	0.15819	1.4097e-07	Pro-specific TNF	TPA-specific
ENSG00000162616	DNAJB4	525.058	-0.0263367	0.104049	0.90599	888.796	0.479895	0.0749681	1.57769e-09	746.34	0.546281	0.0997898	2.62389e-07	595.102	-0.0209196	0.126047	0.910279	Gran-specific TNF	ATRA-specific
ENSG00000142875	PRKACB	2268.28	-0.0773007	0.0707545	0.542583	3272.22	-0.894267	0.053635	1.18191e-60	5261.7	1.05772	0.138341	2.14371e-13	4191.21	0.571268	0.159632	0.00102415	Gran-specific TNF	Conserved diff
ENSG00000203943	SAMD13	73.1952	-0.234461	0.237327	0.591431	5.51407	-1.28995	0.845575	0.25341	215.263	-2.63892	0.231014	7.80756e-29	212.941	-2.64112	0.276267	1.34298e-20	NA	Conserved diff
ENSG00000117133	RPF1	1943.85	0.172804	0.0705372	0.0760993	958.444	-0.0431815	0.0728664	0.712925	2725.18	-0.587073	0.215284	0.0170304	3235.34	-0.000600783	0.239075	0.998752	NA	ATRA-specific
ENSG00000174021	GNG5	2510.93	-0.185013	0.0793191	0.0967621	2575.06	0.356497	0.064485	2.60441e-07	4101.32	0.228611	0.228391	0.455956	5053.27	0.769954	0.258726	0.00725284	Gran-specific TNF	TPA-specific
ENSG00000117151	CTBS	510.234	0.0826039	0.0990762	0.660583	1425.29	-0.116262	0.0673442	0.184632	1322.43	1.38112	0.120219	3.75881e-29	1650.42	1.82947	0.1551	7.23656e-31	NA	Conserved diff
ENSG00000117155	SSX2IP	1160.8	-0.158558	0.0816899	0.191727	448.796	-0.0415405	0.10204	0.810279	1771.99	-1.02472	0.106034	7.14133e-21	2191.22	-0.205495	0.134221	0.202142	NA	ATRA-specific
ENSG00000142867	BCL10	829.628	0.209819	0.0879538	0.087024	1314.66	0.352301	0.0681764	1.71577e-06	1425.84	0.542855	0.16452	0.0030818	1466.22	0.637338	0.20135	0.00406979	Gran-specific TNF	Conserved diff
ENSG00000117174	ZNHIT6	2696.55	0.120363	0.0601429	0.174935	1353.48	-0.0697312	0.062914	0.439227	3010.75	-0.749744	0.164474	2.38902e-05	2887.5	-0.868975	0.186181	1.20681e-05	NA	Conserved diff
ENSG00000122417	ODF2L	292.608	-0.181832	0.143459	0.461102	412.03	-0.271887	0.113001	0.0469464	604.487	0.0194358	0.149426	0.935354	544.998	-0.249943	0.198197	0.306464	Gran-specific TNF	NA
ENSG00000097033	SH3GLB1	1629.32	0.0809174	0.0806663	0.584677	2156.76	0.292794	0.0551259	8.19082e-07	3370.84	0.227449	0.122604	0.12564	8869.86	2.25777	0.150344	1.78884e-49	Gran-specific TNF	TPA-specific
ENSG00000183291	SELENOF	4180.39	0.127982	0.0638514	0.174017	2815.81	-0.0639493	0.0567044	0.429408	11064.1	-0.225221	0.199207	0.39049	14828.8	0.599293	0.226215	0.0182576	NA	TPA-specific
ENSG00000153936	HS2ST1	2085.66	-0.0207396	0.0710629	0.889801	1032.38	-0.313045	0.068778	3.21525e-05	2657.16	-0.36526	0.114178	0.00425542	6151	1.66159	0.137054	1.4794e-32	Gran-specific TNF	Opposite diff
ENSG00000143013	LMO4	855.405	-0.205633	0.0832564	0.0730756	674.991	-0.59913	0.0842033	1.3429e-11	2689.15	-0.183628	0.146195	0.330886	7089.37	2.00625	0.155594	1.03304e-36	Gran-specific TNF	TPA-specific
ENSG00000065243	PKN2	2116.36	0.2031	0.0660925	0.0167766	2707.12	0.0367563	0.0550021	0.672315	3565.7	0.703716	0.151478	1.61255e-05	2665.47	-0.0122385	0.172767	0.961516	Pro-specific TNF	ATRA-specific
ENSG00000241975	ELOCP19	52.4138	0.388717	0.286236	0.418302	68.0801	0.204227	0.27799	0.636559	84.3104	1.12905	0.408589	0.0154381	54.2262	0.123467	0.495094	0.862178	NA	ATRA-specific
ENSG00000137944	KYAT3	1258.61	0.252145	0.083874	0.0202621	1068.08	-0.0262469	0.069851	0.825736	2822.7	-0.240041	0.202774	0.364461	2539.36	-0.556231	0.219928	0.0250009	Pro-specific TNF	TPA-specific
ENSG00000213516	RBMXL1	1275.65	0.255381	0.0742756	0.00578082	974.495	0.179481	0.0776134	0.0581993	1446.94	0.109529	0.11934	0.499644	1206.71	-0.404683	0.163453	0.0285632	Pro-specific TNF	TPA-specific
ENSG00000117226	GBP3	132.536	0.159904	0.188652	0.654636	2131.95	0.950727	0.0547947	1.23175e-65	1398.86	3.32387	0.125505	3.8061e-152	553.848	1.76801	0.169383	2.25105e-24	Gran-specific TNF	Conserved diff
ENSG00000234518	PTGES3P1	43.2567	0.352106	0.320701	0.540752	57.6291	1.9983	0.293403	1.08908e-10	105.806	0.563179	0.205385	0.0163645	90.4144	0.181653	0.261842	0.598865	Gran-specific TNF	ATRA-specific
ENSG00000162645	GBP2	252.7	1.40013	0.144395	2.03221e-20	1387.94	3.00082	0.0808806	8.88037e-299	2064.82	1.75197	0.193761	2.21047e-18	2329.02	1.99403	0.210011	2.48427e-20	Conserved TNF	Conserved diff
ENSG00000154451	GBP5	21.9548	2.51532	0.49062	6.08601e-06	85.3256	0.725602	0.215402	0.00314813	227.576	5.79864	0.33379	9.13621e-66	12.4699	1.10491	0.491721	0.0494139	Conserved TNF	Conserved diff
ENSG00000197147	LRRC8B	1906.22	0.312187	0.067469	6.49016e-05	1254.84	1.28986	0.0677674	7.0089e-79	1582.97	-1.02661	0.202067	2.01736e-06	2631.54	0.596053	0.212548	0.0119068	Conserved TNF	Opposite diff
ENSG00000231999	LRRC8C-DT	55.4309	-0.277066	0.291093	0.60917	14.705	-0.0777071	0.533621	0.937623	105.404	-2.01039	0.190088	7.87129e-25	134.959	-0.687749	0.17474	0.000271173	NA	Conserved diff
ENSG00000230735	AC093423.2	59.6215	0.434264	0.278415	0.331492	31.3973	0.172765	0.335712	0.754823	15.4047	-1.59886	0.415482	0.00044539	18.4747	-0.698486	0.395784	0.134547	NA	ATRA-specific
ENSG00000171488	LRRC8C	2665.48	-0.069779	0.0631086	0.537062	963.724	0.0770215	0.0725386	0.463433	3755.51	-1.34195	0.177517	4.06919e-13	8383.79	1.10669	0.176753	2.19172e-09	NA	Opposite diff
ENSG00000272931	AC099568.2	33.9112	0.00560238	0.370777	0.99482	17.9098	0.137577	0.468927	0.867037	51.4116	-0.439008	0.264481	0.178798	38.1029	-1.75635	0.347716	1.91234e-06	NA	TPA-specific
ENSG00000171492	LRRC8D	2461.74	0.0556984	0.0660067	0.656157	1740.68	-0.288221	0.0589684	6.76423e-06	5115.18	-0.397517	0.121056	0.00324372	4776.74	-0.593101	0.163771	0.00087842	Gran-specific TNF	Conserved diff
ENSG00000272672	AL391497.1	30.068	-0.0470438	0.373105	0.953381	39.941	-0.772795	0.322493	0.0479841	3.60349	-0.815015	0.835553	0.469403	3.34253	-1.1056	0.909551	0.326229	Gran-specific TNF	NA
ENSG00000162664	ZNF326	3453.58	0.123691	0.0644414	0.1987	2716.12	0.110046	0.0516061	0.0859487	3466.93	0.00229741	0.082107	0.986865	3027.64	-0.377039	0.101378	0.000616398	NA	TPA-specific
ENSG00000097046	CDC7	2086.02	0.0169394	0.0701434	0.910636	634.418	-0.161865	0.0896055	0.16105	2519.71	-1.47631	0.107025	1.05445e-41	1937.35	-4.1064	0.13052	1.36485e-214	NA	Conserved diff
ENSG00000069702	TGFBR3	217.261	0.9756	0.150931	3.16874e-09	69.873	1.81251	0.270271	2.18607e-10	194.56	-0.495903	0.14613	0.00226237	153.533	-1.44629	0.196644	1.39481e-12	Conserved TNF	Conserved diff
ENSG00000174842	GLMN	1812.08	0.0923773	0.0836433	0.537624	1012.68	-0.817988	0.0840714	4.70597e-21	2012.8	-0.645367	0.170085	0.000544952	1717.84	-1.26748	0.181114	1.754e-11	Gran-specific TNF	Conserved diff
ENSG00000122484	RPAP2	4292.65	-0.105217	0.0605415	0.261851	3446.53	-0.913478	0.0509148	3.93252e-70	5172.95	-0.0552832	0.154383	0.814513	4330.49	-0.58897	0.168513	0.00137857	Gran-specific TNF	TPA-specific
ENSG00000162676	GFI1	4988.99	-0.281627	0.053326	2.81174e-06	3734.31	-2.20294	0.0510875	0	11216.8	0.200286	0.0868704	0.0487314	7124.59	-1.38751	0.123651	4.98816e-28	Conserved TNF	Opposite diff
ENSG00000067208	EVI5	719.574	-0.0550703	0.0877359	0.752108	693.93	-0.432736	0.0853991	2.83544e-06	643.684	0.201319	0.146463	0.280955	1072.94	1.39416	0.149611	1.28779e-19	Gran-specific TNF	TPA-specific
ENSG00000122406	RPL5	29569.1	0.041099	0.0603192	0.729122	15978.4	0.0071198	0.050291	0.939136	124190	-0.764111	0.244869	0.00543546	105827	-1.43953	0.264866	2.61409e-07	NA	Conserved diff
ENSG00000117500	TMED5	4252.02	0.110127	0.0597909	0.224237	4163.74	0.0310907	0.0562403	0.73451	6685.51	0.231213	0.123223	0.120709	9405.04	1.06721	0.149809	7.30482e-12	NA	TPA-specific
ENSG00000122483	CCDC18	2005.96	0.0286925	0.0726272	0.846084	1635.04	-0.221123	0.0632222	0.00204034	2305.87	-0.217822	0.117387	0.125536	1701.67	-1.35632	0.126089	7.88958e-26	Gran-specific TNF	TPA-specific
ENSG00000223745	CCDC18-AS1	192.418	0.0782237	0.162492	0.810946	696.895	-0.395393	0.0898264	6.18839e-05	1113.17	0.926724	0.19906	1.54133e-05	1026.69	0.776999	0.243071	0.0036867	Gran-specific TNF	Conserved diff
ENSG00000117505	DR1	6071.25	0.0750303	0.0569638	0.437638	6081.81	-0.0485407	0.0467433	0.475003	8234.62	-0.0269142	0.111977	0.880127	10338.9	0.602506	0.140043	6.10479e-05	NA	TPA-specific
ENSG00000137942	FNBP1L	77.4296	-0.322464	0.244914	0.4378	283.402	0.36422	0.125975	0.013546	323.41	-0.0552486	0.170468	0.833613	640.848	1.55432	0.18182	1.15483e-16	Gran-specific TNF	TPA-specific
ENSG00000067334	DNTTIP2	3467.33	0.269441	0.0594488	9.79533e-05	1886.82	0.371023	0.0580112	1.63513e-09	4542.52	-0.59006	0.160186	0.00081919	5018.04	-0.217539	0.194079	0.369851	Conserved TNF	ATRA-specific
ENSG00000023909	GCLM	1269.17	0.0505635	0.0859611	0.767798	1038.44	1.83024	0.0877828	1.45398e-94	899.404	-1.74471	0.139094	1.31605e-34	1225.9	-0.337462	0.160968	0.0691078	Gran-specific TNF	ATRA-specific
ENSG00000117528	ABCD3	2023.74	-0.0223683	0.070747	0.880214	985.121	-0.263733	0.0931722	0.0160146	2152.44	-0.788093	0.117492	1.61023e-10	2085.6	-0.866132	0.144533	1.12074e-08	Gran-specific TNF	Conserved diff
ENSG00000117525	F3	139.432	2.63775	0.200994	2.9656e-37	1037.76	3.78734	0.106024	5.73362e-277	153.194	1.44057	0.31218	1.85859e-05	301.121	2.68042	0.180115	1.3501e-48	Conserved TNF	Conserved diff
ENSG00000172339	ALG14	227.051	0.0370619	0.142576	0.903098	99.3139	-0.538062	0.199414	0.0228247	254.659	-0.427063	0.242771	0.150016	252.642	-0.419507	0.256435	0.169384	Gran-specific TNF	NA
ENSG00000137970	RPL7P9	560.251	-0.00671813	0.125575	0.982797	314.254	0.12174	0.116097	0.470216	6388.33	-0.831612	0.272429	0.00668943	5824.55	-1.1871	0.289169	0.000138646	NA	Conserved diff
ENSG00000117569	PTBP2	1754.03	0.177091	0.0792678	0.116436	1448.09	0.161658	0.0703249	0.060042	1305.19	-0.0664109	0.130904	0.730402	1071.76	-0.674939	0.162964	0.00011943	NA	TPA-specific
ENSG00000156869	FRRS1	312.309	0.185093	0.123213	0.355527	717.978	-0.42656	0.0790538	5.28477e-07	844.002	1.50814	0.185512	4.99249e-15	574.97	0.726636	0.210781	0.00162046	Gran-specific TNF	Conserved diff
ENSG00000162688	AGL	945.188	0.164365	0.0893185	0.224789	1965.93	-0.0627071	0.0609371	0.479683	2653.55	1.10865	0.149326	1.10892e-12	1544.01	-0.215625	0.158098	0.263404	NA	ATRA-specific
ENSG00000117620	SLC35A3	1472.44	0.124118	0.0829262	0.358238	1116.98	0.0145628	0.0809176	0.922749	1446.79	-0.235796	0.123025	0.111751	1198.73	-0.855165	0.157368	2.62504e-07	NA	TPA-specific
ENSG00000156875	MFSD14A	119.956	-0.0267699	0.212846	0.953502	130.278	0.409312	0.172752	0.051113	293.967	1.0685	0.231826	1.90546e-05	275.465	0.957066	0.256914	0.000602661	NA	Conserved diff
ENSG00000156876	SASS6	1897.51	0.209532	0.0723478	0.027251	822.586	-0.2113	0.0759378	0.0182534	1845.11	-0.810984	0.127531	1.52655e-09	1413.23	-2.19915	0.139838	3.57619e-54	Opposite TNF	Conserved diff
ENSG00000122435	TRMT13	1113.82	0.0910833	0.0804292	0.524505	757.654	0.151102	0.0871806	0.182636	1109.65	-0.407538	0.126743	0.00403757	1005.06	-0.71284	0.143392	2.84212e-06	NA	Conserved diff
ENSG00000137992	DBT	1250.22	-0.138215	0.0728289	0.205511	1204.45	-0.498366	0.0686763	4.95179e-12	2413.31	0.199988	0.187081	0.421024	2234.61	0.0228561	0.191217	0.935028	Gran-specific TNF	NA
ENSG00000224616	RTCA-AS1	33.4668	-0.33578	0.343553	0.595828	94.4096	-0.858961	0.213628	0.000297727	91.6832	1.76924	0.195739	2.27239e-18	64.7073	1.1118	0.255268	4.86133e-05	Gran-specific TNF	Conserved diff
ENSG00000137996	RTCA	1653.81	0.128945	0.0670159	0.197345	2110.41	0.165022	0.0547661	0.00953092	3624.86	0.120276	0.190028	0.660143	4008.29	0.415741	0.211039	0.0901847	Gran-specific TNF	NA
ENSG00000079335	CDC14A	656.193	0.0576068	0.092529	0.754462	1532.07	-0.170838	0.0638495	0.0242607	1677.2	1.84334	0.134002	1.7755e-41	761.522	0.151882	0.141358	0.392855	Gran-specific TNF	ATRA-specific
ENSG00000162692	VCAM1	280.729	9.74374	1.02653	1.39969e-19	1129.05	8.95193	0.377726	4.46433e-122	82.0022	4.82796	0.388964	6.64231e-34	53.8233	4.20937	0.396955	3.986e-25	Conserved TNF	Conserved diff
ENSG00000162694	EXTL2	908.676	0.0348669	0.0875898	0.844777	629.443	-0.588919	0.09104	1.0302e-09	2358.06	-0.603666	0.102818	2.86548e-08	2050.47	-1.12186	0.116663	7.86964e-21	Gran-specific TNF	Conserved diff
ENSG00000162695	SLC30A7	3654.09	0.0946425	0.0616588	0.342793	3857.17	0.137647	0.0544902	0.0352356	3487.66	0.264075	0.153207	0.159778	3317.18	0.164941	0.162406	0.422262	Gran-specific TNF	NA
ENSG00000117543	DPH5	1104.34	0.0423783	0.0856835	0.806223	404.567	-0.336686	0.110148	0.00838619	2385.59	-1.42262	0.237352	1.40289e-08	2339.58	-1.46847	0.250109	2.28317e-08	Gran-specific TNF	Conserved diff
ENSG00000233184	AC093157.1	243.925	0.265928	0.137053	0.191914	142.702	-0.219113	0.161968	0.323569	290.466	-1.29248	0.155501	1.14418e-15	284.188	-1.33913	0.196007	5.45544e-11	NA	Conserved diff
ENSG00000183298	RPSAP19	40.3416	-0.492481	0.310958	0.322258	33.2756	0.440504	0.325345	0.323122	30.6947	-0.726724	0.429274	0.168675	24.8354	-1.7026	0.46353	0.000729262	NA	TPA-specific
ENSG00000185946	RNPC3	1084.7	0.0789843	0.0907248	0.645285	1086.01	-0.290282	0.0713059	0.000244264	1594.9	-0.113672	0.124792	0.503072	1415.05	-0.453527	0.167655	0.0156952	Gran-specific TNF	TPA-specific
ENSG00000240038	AMY2B	122.013	-0.271817	0.202755	0.426796	151.664	-0.52371	0.169164	0.00744857	319.609	0.323124	0.190834	0.16859	335.731	0.480577	0.251071	0.101066	Gran-specific TNF	NA
ENSG00000198890	PRMT6	1211.95	-0.0489195	0.0766345	0.74819	431.154	-0.437581	0.0996715	6.50809e-05	1467.85	-0.67831	0.126191	4.43734e-07	1534.25	-0.476913	0.190592	0.0267456	Gran-specific TNF	Conserved diff
ENSG00000134215	VAV3	1813.14	0.104881	0.0682164	0.341674	1159.02	-0.312112	0.0758285	0.000203623	2441.18	-0.598673	0.143887	0.000130344	2813.23	-0.0923545	0.162053	0.67083	Gran-specific TNF	ATRA-specific
ENSG00000085491	SLC25A24	1417.63	-0.038348	0.0716726	0.790318	1931.77	0.229954	0.0596846	0.000570035	3894.77	0.0136721	0.118318	0.942749	5569.32	0.932664	0.143152	4.4159e-10	Gran-specific TNF	TPA-specific
ENSG00000162636	FAM102B	798.852	-0.473031	0.0891087	2.43788e-06	350.348	-1.11035	0.12017	4.74779e-19	1468.34	-0.538839	0.171953	0.00521763	3536.99	1.64133	0.173054	2.73241e-20	Conserved TNF	Opposite diff
ENSG00000162639	HENMT1	748.32	-0.11044	0.0954267	0.513274	319.582	-0.91674	0.128999	1.42728e-11	1635.49	-0.822533	0.231854	0.00133152	1403.04	-1.48352	0.246477	9.57322e-09	Gran-specific TNF	Conserved diff
ENSG00000134186	PRPF38B	4327.9	0.0860326	0.0557122	0.338693	3165.29	-0.120111	0.0542957	0.0729051	8132.67	-0.188052	0.0963037	0.104161	7486.93	-0.413029	0.13588	0.00599563	NA	TPA-specific
ENSG00000116266	STXBP3	1944.31	0.309869	0.0763634	0.000665092	1963.13	0.042652	0.0703975	0.705201	3464.91	0.294806	0.13009	0.0534693	4021.42	0.691728	0.151727	1.98574e-05	Pro-specific TNF	TPA-specific
ENSG00000121957	GPSM2	1183.37	-0.156173	0.076023	0.160374	1630.16	-0.378082	0.0649626	5.19626e-08	1960.29	0.397379	0.124085	0.00421115	1104.93	-1.62951	0.138219	7.75647e-31	Gran-specific TNF	Opposite diff
ENSG00000121940	CLCC1	1650.48	0.0147145	0.0749714	0.92833	970.966	-0.0599173	0.074574	0.599206	1094.08	-0.405657	0.154433	0.0221942	1210.69	-0.0480842	0.169218	0.841085	NA	ATRA-specific
ENSG00000085433	WDR47	503.217	0.0560094	0.0987389	0.77642	746.393	0.541908	0.097496	2.21565e-07	1220.13	0.629469	0.130913	7.59158e-06	1748.78	1.4316	0.155621	3.81195e-19	Gran-specific TNF	Conserved diff
ENSG00000244716	BX679664.3	85.1753	-0.0273945	0.247419	0.96054	55.7408	0.295304	0.263911	0.433967	508.808	-0.627047	0.317181	0.0992443	467.079	-0.923006	0.340537	0.015478	NA	TPA-specific
ENSG00000197780	TAF13	791.609	0.203237	0.0897677	0.110171	871.679	0.350913	0.0865278	0.00025977	1322.9	0.521768	0.212107	0.0337908	1740.36	1.16358	0.231641	2.19896e-06	Gran-specific TNF	Conserved diff
ENSG00000273382	AL356488.3	51.1709	-0.0213913	0.278613	0.973059	83.4981	-0.346228	0.228922	0.258244	72.8067	1.25824	0.225984	1.57568e-07	50.3466	0.459644	0.282393	0.171787	NA	ATRA-specific
ENSG00000215717	TMEM167B	1192.39	0.233164	0.0745896	0.0145384	1749.78	0.15384	0.0644512	0.0490607	3923.65	0.592217	0.138784	8.3908e-05	3877.81	0.592357	0.171751	0.00161194	Conserved TNF	Conserved diff
ENSG00000031698	SARS	2161.11	-0.026231	0.0719533	0.860072	1529.65	-0.124263	0.059721	0.0955187	7760.17	-0.249148	0.213989	0.37388	11414.1	0.798258	0.244009	0.00290909	NA	TPA-specific
ENSG00000134222	PSRC1	427.264	-0.463527	0.106103	0.000193448	220.032	-0.641955	0.140381	2.91978e-05	1093.41	-0.32749	0.22117	0.239704	1344.94	0.305245	0.221371	0.257411	Conserved TNF	NA
ENSG00000162650	ATXN7L2	274.557	-0.0915718	0.151849	0.763058	161.553	-0.155636	0.1658	0.526216	408.954	0.123484	0.127365	0.472719	494.208	0.637346	0.129434	3.5806e-06	NA	TPA-specific
ENSG00000174151	CYB561D1	537.181	-0.210201	0.105949	0.179386	1025.66	-0.125777	0.0774408	0.217712	2387.43	0.856142	0.119693	7.74925e-12	2873.1	1.27867	0.146101	2.01694e-17	NA	Conserved diff
ENSG00000065135	GNAI3	4869.19	0.0497331	0.0591007	0.657299	5260.66	0.138326	0.0513741	0.0231926	8133.38	0.252818	0.136487	0.126353	7821.58	0.179661	0.162373	0.376981	Gran-specific TNF	NA
ENSG00000116337	AMPD2	2252.76	-0.284152	0.0652063	0.00020244	2703.9	-0.468849	0.061856	4.68271e-13	9875.67	0.643951	0.0761242	3.39409e-16	8950.04	0.435042	0.14113	0.00525621	Conserved TNF	Conserved diff
ENSG00000168765	GSTM4	568.594	-0.119032	0.0937405	0.460051	1739.11	-0.150582	0.0662416	0.063585	3569.68	1.47627	0.154187	1.66134e-20	1964.07	0.144326	0.16877	0.507237	NA	ATRA-specific
ENSG00000213366	GSTM2	42.8752	-0.268883	0.3052	0.640883	928.82	-0.383342	0.0739772	1.59439e-06	2355.24	3.42075	0.149358	6.40566e-114	949.136	1.91837	0.20678	1.87509e-19	Gran-specific TNF	Conserved diff
ENSG00000184371	CSF1	89.7241	2.84659	0.270208	4.69814e-24	226.86	3.12099	0.166657	2.23776e-76	370.12	2.57492	0.222271	1.26385e-29	6905.87	7.02757	0.234904	4.56175e-194	Conserved TNF	Conserved diff
ENSG00000168710	AHCYL1	3398.52	-0.0159821	0.0585229	0.898515	2449.13	0.286377	0.0527183	4.34674e-07	7479.51	-0.0257497	0.125072	0.896893	10550.1	0.872957	0.157966	1.59659e-07	Gran-specific TNF	TPA-specific
ENSG00000258634	AL160006.1	266.567	-0.0815043	0.129372	0.751225	135.144	0.00168403	0.165498	0.995526	381.73	-0.300677	0.120987	0.0317325	389.743	-0.193362	0.138363	0.250169	NA	ATRA-specific
ENSG00000116396	KCNC4	721.307	-0.573229	0.0912357	9.81459e-09	183.109	0.114737	0.151123	0.623887	797.673	-1.88395	0.231373	4.49641e-15	685.787	-3.2067	0.26297	6.3278e-33	Pro-specific TNF	Conserved diff
ENSG00000227963	RBM15-AS1	74.9531	-0.0536894	0.235426	0.915445	46.6015	-0.216465	0.282658	0.620597	67.9303	-0.513223	0.223435	0.0497541	52.4103	-1.61913	0.278426	3.16113e-08	NA	Conserved diff
ENSG00000162775	RBM15	3225.67	-0.0097867	0.0590719	0.940377	2290.23	0.0416073	0.054591	0.62246	2800.27	-0.570589	0.16379	0.00166718	2498.17	-0.963513	0.177568	2.73865e-07	NA	Conserved diff
ENSG00000224699	LAMTOR5-AS1	454.006	-0.118394	0.103417	0.519062	346.562	-0.493791	0.110149	4.33923e-05	175.64	-0.214658	0.228434	0.488299	139.142	-1.00712	0.284603	0.00118304	Gran-specific TNF	TPA-specific
ENSG00000273373	AL355488.1	528.829	0.0346961	0.133593	0.903098	340.767	-0.387318	0.110729	0.00203853	481.303	-0.593955	0.336715	0.148745	384.885	-1.52643	0.36065	8.20119e-05	Gran-specific TNF	TPA-specific
ENSG00000143119	CD53	1199.19	0.0131298	0.0758186	0.938131	8731.83	0.0949703	0.0412958	0.0599196	15383.6	2.41333	0.141816	3.86418e-63	21076.7	2.9582	0.179808	3.2868e-59	NA	Conserved diff
ENSG00000261654	AL360270.2	136.038	-0.141762	0.192908	0.704927	186.683	-0.456114	0.151594	0.00965653	173.481	0.716317	0.211365	0.00229823	171.272	0.720554	0.225183	0.00364933	Gran-specific TNF	Conserved diff
ENSG00000121931	LRIF1	1479.99	0.0973137	0.0717925	0.419663	1674.25	-0.185966	0.0623821	0.0104412	3065.45	0.233799	0.151906	0.218364	3068.44	0.26743	0.191651	0.250943	Gran-specific TNF	NA
ENSG00000156171	DRAM2	1005	0.0621213	0.0796631	0.683756	1826.65	-0.226103	0.0596766	0.0007236	4745.98	0.957651	0.194345	4.275e-06	3920.1	0.543698	0.209301	0.0209385	Gran-specific TNF	Conserved diff
ENSG00000134255	CEPT1	2361.25	0.182388	0.0684643	0.0477407	2471.44	-0.307835	0.0548495	1.65653e-07	3105.02	0.526101	0.112379	1.36853e-05	2879.58	0.36971	0.12645	0.00845747	Opposite TNF	Conserved diff
ENSG00000162777	DENND2D	23.2727	0.806965	0.415364	0.191521	77.2762	-0.799845	0.22039	0.00129134	371.612	3.70555	0.194865	1.10958e-78	238.805	3.02575	0.192991	7.60802e-54	Gran-specific TNF	Conserved diff
ENSG00000085465	OVGP1	56.127	-0.824848	0.279213	0.0232787	52.1711	-0.71481	0.280746	0.0335324	182.014	0.167334	0.203445	0.551994	315.68	1.44924	0.232206	2.48382e-09	Conserved TNF	TPA-specific
ENSG00000260948	AL390195.2	62.2725	-0.422101	0.259356	0.303554	57.9416	-0.467805	0.261321	0.165581	79.3754	0.17392	0.311915	0.702168	124.71	1.2613	0.3344	0.00050684	NA	TPA-specific
ENSG00000116455	WDR77	1582.12	0.0789232	0.0672405	0.505298	652.76	-0.00273768	0.0848827	0.985932	1871.62	-0.543763	0.144133	0.00058989	2117.44	-0.104742	0.171907	0.64772	NA	ATRA-specific
ENSG00000116459	ATP5F1	7968.91	0.0635213	0.0607156	0.565062	4043.26	-0.0290539	0.0523483	0.73316	16011	-0.746824	0.241009	0.00581213	15254.1	-0.896743	0.265206	0.00202639	NA	Conserved diff
ENSG00000143110	C1orf162	361.108	-0.212266	0.118753	0.244117	108.848	-1.25816	0.197774	2.02345e-09	955.469	-0.410822	0.162765	0.0288381	1400.81	0.677315	0.179583	0.000507249	Gran-specific TNF	Opposite diff
ENSG00000121933	TMIGD3	21.781	-0.0143615	0.435157	0.989259	43.0341	-1.84796	0.325952	1.21799e-07	153.479	0.973088	0.258698	0.000614207	261.452	2.03938	0.254172	8.58153e-15	Gran-specific TNF	Conserved diff
ENSG00000116473	RAP1A	2899.52	0.187637	0.0703885	0.0475142	4203.71	0.106013	0.124762	0.573956	9179.9	0.805853	0.190877	0.0001014	15222.5	1.85173	0.217284	1.44292e-16	Pro-specific TNF	Conserved diff
ENSG00000197852	FAM212B	68.323	-0.574381	0.260039	0.122213	224.694	0.00149415	0.132556	0.994973	519.02	1.39252	0.151106	4.60751e-19	642.881	1.82756	0.170737	1.38744e-25	NA	Conserved diff
ENSG00000064703	DDX20	1704.99	0.228675	0.0732597	0.014695	900.992	-0.0438882	0.0731543	0.708608	2407.87	-0.530077	0.131387	0.000216564	2660.78	-0.163843	0.165655	0.435918	Pro-specific TNF	ATRA-specific
ENSG00000116489	CAPZA1	13199.9	0.0976054	0.0545462	0.243881	16286.8	-0.0254948	0.042781	0.710919	22707.7	0.601053	0.143033	0.000109938	22941.8	0.653528	0.173224	0.000505131	NA	Conserved diff
ENSG00000155363	MOV10	349.564	0.0368895	0.118734	0.88217	1493.22	0.365184	0.0780641	1.81208e-05	3465.15	1.81784	0.0923373	2.70468e-84	3110.87	1.639	0.113244	5.15131e-46	Gran-specific TNF	Conserved diff
ENSG00000155366	RHOC	159.727	-0.214534	0.170707	0.466754	293.949	0.446068	0.121294	0.0010873	1368.73	0.372651	0.247189	0.229684	4506.06	2.73102	0.263885	5.61883e-24	Gran-specific TNF	TPA-specific
ENSG00000155380	SLC16A1	9540.11	0.0794029	0.0575314	0.40921	984.541	-0.0542803	0.0794565	0.664433	6892.92	-2.07474	0.160084	6.78504e-37	9909.58	-0.321432	0.183618	0.138101	NA	ATRA-specific
ENSG00000226419	SLC16A1-AS1	502.216	-0.240666	0.109793	0.125797	174.184	0.72186	0.156739	2.52353e-05	436.498	-2.58601	0.164545	6.02256e-54	538.621	-1.12306	0.181413	3.38857e-09	Gran-specific TNF	Conserved diff
ENSG00000081026	MAGI3	61.5716	-0.643006	0.27483	0.0954043	48.4361	-0.463664	0.292469	0.231481	66.2472	0.194205	0.225542	0.530897	42.0876	-1.36686	0.32637	9.85446e-05	NA	TPA-specific
ENSG00000116793	PHTF1	832.792	-0.00403107	0.0896543	0.985389	1585.88	-0.0905909	0.0633056	0.290805	1537.71	0.733757	0.0887354	1.61908e-15	1420.33	0.575396	0.113782	1.85852e-06	NA	Conserved diff
ENSG00000081019	RSBN1	1860.72	0.0362293	0.0681341	0.791723	1376.52	-0.414242	0.0636399	7.95893e-10	2429.46	0.0846494	0.127519	0.642335	2489.53	0.186589	0.141973	0.284099	Gran-specific TNF	NA
ENSG00000134242	PTPN22	1360.67	-0.0870247	0.0754661	0.51501	4823.43	-0.633308	0.0543042	5.85655e-30	6470.64	1.5652	0.119138	6.80194e-38	3977.63	0.550588	0.141907	0.000336786	Gran-specific TNF	Conserved diff
ENSG00000134262	AP4B1	1152.11	-0.269673	0.0816446	0.00879445	1030.21	-0.381592	0.0728527	1.20091e-06	2036.69	-0.126556	0.136263	0.493989	1742.53	-0.601914	0.15232	0.000255409	Conserved TNF	TPA-specific
ENSG00000118655	DCLRE1B	874.338	-0.161462	0.0831568	0.19163	273.442	0.0238067	0.12252	0.915179	1451.01	-1.22034	0.142415	1.35674e-16	1816.22	-0.302393	0.170016	0.131184	NA	ATRA-specific
ENSG00000197323	TRIM33	3289.4	0.0886884	0.0661598	0.426796	2958.65	-0.10063	0.0521556	0.128888	4756.24	0.218146	0.177848	0.344146	5088.73	0.42804	0.184005	0.0411159	NA	TPA-specific
ENSG00000116752	BCAS2	1314.29	0.141006	0.0760533	0.220194	603.413	0.207752	0.0868495	0.0484478	1925.7	-0.458666	0.204475	0.0563721	1995.36	-0.303462	0.232602	0.28822	Gran-specific TNF	NA
ENSG00000213281	NRAS	5222.65	0.224501	0.0622788	0.0033627	4583.58	0.417523	0.0482264	8.32767e-17	6610.35	0.318495	0.125031	0.0272105	6497.57	0.305451	0.152332	0.0840485	Conserved TNF	ATRA-specific
ENSG00000052723	SIKE1	2565.59	0.0920177	0.0620384	0.364292	2076.9	-0.251105	0.0576994	7.65966e-05	4707.93	-0.124188	0.116529	0.42279	4034.3	-0.590241	0.129535	2.00737e-05	Gran-specific TNF	TPA-specific
ENSG00000173218	VANGL1	303.154	-0.374959	0.133394	0.0335246	291.443	-0.247861	0.117744	0.0910499	326.449	-0.231342	0.140443	0.182542	308.982	-0.368028	0.165366	0.051916	Pro-specific TNF	NA
ENSG00000163393	SLC22A15	1368.86	-0.0887185	0.0719085	0.478437	1020.24	-0.131574	0.0752448	0.177873	2685.35	-0.387745	0.124618	0.00558808	2273.14	-0.963732	0.132513	2.52436e-12	NA	Conserved diff
ENSG00000173212	MAB21L3	27.1287	-0.19231	0.377351	0.800669	21.4697	-0.69836	0.449468	0.242811	55.8897	-0.889942	0.375243	0.0418284	63.1336	-0.389282	0.365465	0.397541	NA	ATRA-specific
ENSG00000163399	ATP1A1	13887.4	-0.0585512	0.0580495	0.582102	9747.72	0.312017	0.0462366	1.65411e-10	23073.5	-0.0211537	0.129038	0.917674	25722.9	0.31166	0.179772	0.142428	Gran-specific TNF	NA
ENSG00000203865	ATP1A1-AS1	26.8981	-0.194226	0.397379	0.808047	100.489	-0.893991	0.196543	3.25521e-05	94.3832	0.773928	0.185913	0.000129189	55.7106	-0.691838	0.247402	0.0121803	Gran-specific TNF	Opposite diff
ENSG00000224950	AL390066.1	143.535	1.3153	0.186542	6.46154e-11	375.843	1.19826	0.118753	1.35768e-22	184.992	1.19282	0.260215	2.13234e-05	170.217	1.05143	0.300992	0.00138666	Conserved TNF	Conserved diff
ENSG00000116815	CD58	562.267	1.01498	0.0963034	4.50009e-24	1733.71	1.60704	0.0623046	1.6792e-144	1234.99	1.16725	0.166765	2.24563e-11	2354.93	2.39606	0.170572	2.13359e-43	Conserved TNF	Conserved diff
ENSG00000177173	NAP1L4P1	92.9203	1.40752	0.226492	1.47184e-08	338.614	1.95413	0.12598	1.42825e-52	32.5961	1.25549	0.495411	0.0281132	42.9506	1.82663	0.521172	0.00133318	Conserved TNF	Conserved diff
ENSG00000143061	IGSF3	73.187	-0.0894006	0.23532	0.852932	24.5165	0.511909	0.395544	0.349954	90.8304	-1.03682	0.221724	1.40223e-05	98.8076	-0.648731	0.248922	0.0204683	NA	Conserved diff
ENSG00000134256	CD101	38.8738	-0.260317	0.339524	0.690191	1219.16	-0.475453	0.0836682	1.13101e-07	1925.22	5.5248	0.13562	0	2520.32	5.94239	0.191733	2.80394e-208	Gran-specific TNF	Conserved diff
ENSG00000236137	AL445231.1	25.4246	0.0975675	0.410545	0.911333	14.9003	0.0737704	0.519608	0.939136	26.6171	1.88769	0.364838	1.2608e-06	36.5741	2.46868	0.344708	5.58938e-12	NA	Conserved diff
ENSG00000116830	TTF2	6082.71	0.118073	0.0604827	0.188626	2895.92	0.12881	0.0505281	0.0333058	6814.04	-0.860901	0.187543	2.07346e-05	5276.16	-2.20509	0.194296	1.1921e-28	Gran-specific TNF	Conserved diff
ENSG00000134253	TRIM45	35.504	-0.0509241	0.348567	0.946649	12.929	-1.24569	0.562696	0.0726663	75.2675	-1.12866	0.201641	1.339e-07	60.2959	-2.43634	0.267702	9.30339e-19	NA	Conserved diff
ENSG00000198162	MAN1A2	2438.62	0.0305307	0.0645914	0.815459	3367.38	-0.096149	0.0510825	0.14038	3176.01	0.581409	0.202938	0.0116055	3040.32	0.507559	0.210457	0.0334662	NA	Conserved diff
ENSG00000183508	FAM46C	7972.99	0.762708	0.0513552	1.10576e-47	502.256	1.25274	0.112367	1.98387e-27	4740.26	-3.65977	0.108313	1.6919e-247	5304.38	-2.16769	0.122198	1.06429e-68	Conserved TNF	Conserved diff
ENSG00000196505	GDAP2	1805.56	0.0842301	0.0660728	0.457227	2534.48	-0.161872	0.0534494	0.00911702	1321.9	0.532272	0.0990784	4.50574e-07	1322	0.563649	0.11948	9.56541e-06	Gran-specific TNF	Conserved diff
ENSG00000065183	WDR3	5643.06	0.0162202	0.0562047	0.891024	995.364	-0.193709	0.0720738	0.0234841	4819.78	-1.76896	0.159799	3.99475e-27	4806.17	-1.70895	0.179378	1.83248e-20	Gran-specific TNF	Conserved diff
ENSG00000116874	WARS2	742.814	0.214509	0.0995731	0.134421	382.554	-0.103737	0.107161	0.51084	984.564	-0.910767	0.177461	1.55924e-06	884.361	-1.35197	0.196977	4.40545e-11	NA	Conserved diff
ENSG00000231365	AL359915.2	604.149	-0.0360276	0.0915932	0.846456	371.649	-0.268715	0.105016	0.0325482	482.684	-0.696626	0.109266	1.37699e-09	389.152	-1.6405	0.134655	7.24525e-33	Gran-specific TNF	Conserved diff
ENSG00000143067	ZNF697	198.545	0.297376	0.146732	0.167807	504.746	1.03461	0.0952012	4.23031e-26	323.872	1.28715	0.152055	3.24094e-16	502.906	2.14201	0.186266	2.18297e-29	Gran-specific TNF	Conserved diff
ENSG00000092621	PHGDH	4092.7	-0.175506	0.0603288	0.0263216	561.424	-0.136176	0.0946105	0.287426	12462.2	-0.676486	0.225966	0.00799492	9308.59	-2.1329	0.270987	2.84507e-14	Pro-specific TNF	Conserved diff
ENSG00000261662	AL359752.1	39.237	0.790119	0.33872	0.0967621	87.8937	0.0925076	0.205932	0.788872	89.4942	1.37739	0.263731	9.82294e-07	88.6346	1.37707	0.282916	4.70998e-06	NA	Conserved diff
ENSG00000134250	NOTCH2	8108.2	0.471208	0.0708501	9.67475e-10	12516.7	0.489931	0.0514795	3.62013e-20	17614.7	1.39669	0.270194	1.29027e-06	13587.6	0.88094	0.273543	0.00342166	Conserved TNF	Conserved diff
ENSG00000265808	SEC22B	2937.21	0.0864569	0.0602758	0.385785	3005.07	0.117792	0.0495135	0.0499473	4838.26	0.309644	0.109808	0.0131667	4393.49	0.0814763	0.143576	0.672289	Gran-specific TNF	ATRA-specific
ENSG00000223804	AC244669.1	132.249	0.219564	0.179976	0.484804	137.762	0.250337	0.170614	0.276166	211.522	0.0367913	0.214929	0.914176	170.173	-0.630347	0.260622	0.0328832	NA	TPA-specific
ENSG00000270231	NBPF8	1817.94	0.36191	0.0722945	1.08959e-05	982.612	0.789081	0.0711979	4.08463e-27	3175.98	-0.892563	0.120067	1.03321e-12	3142.24	-0.882265	0.137003	7.14754e-10	Conserved TNF	Conserved diff
ENSG00000275131	AC241952.1	127.73	0.455256	0.18455	0.0734695	138.451	0.557128	0.173867	0.00532344	225.215	-0.195171	0.16797	0.375127	232.142	-0.0630134	0.182377	0.803932	Gran-specific TNF	NA
ENSG00000273136	NBPF26	1635.77	1.0179	0.0926519	3.77515e-26	1350.44	1.40558	0.0859567	2.32042e-58	1678.83	0.131111	0.237713	0.705458	1465.31	-0.227027	0.241711	0.461843	Conserved TNF	NA
ENSG00000198019	FCGR1B	83.2384	0.29135	0.222948	0.442139	223.149	-0.870341	0.136928	2.09087e-09	826.259	1.59952	0.160343	3.49122e-22	969.318	1.91863	0.1993	7.1129e-21	Gran-specific TNF	Conserved diff
ENSG00000188610	FAM72B	2076.5	-0.0556855	0.0652015	0.652238	600.957	-0.298849	0.0863711	0.00231879	1918.41	-1.26797	0.172033	1.64332e-12	1484.49	-3.21047	0.191811	2.98624e-61	Gran-specific TNF	Conserved diff
ENSG00000171943	SRGAP2C	928.383	0.13214	0.0791348	0.286815	1288.05	0.252819	0.0711737	0.00169215	1790.47	0.528752	0.166737	0.00464475	2143.61	0.973202	0.172198	7.97162e-08	Gran-specific TNF	Conserved diff
ENSG00000263590	AC239800.3	27.5212	-0.114021	0.419262	0.899039	45.5237	-0.00970899	0.280882	0.984897	132.149	0.646421	0.157057	0.000156506	112.532	0.276699	0.178826	0.196719	NA	ATRA-specific
ENSG00000265531	FCGR1CP	60.1199	0.146029	0.274172	0.791331	232.787	-1.43532	0.153186	1.43521e-19	870.393	0.972241	0.199741	5.70384e-06	831.656	0.896154	0.230374	0.000323998	Gran-specific TNF	Conserved diff
ENSG00000263513	FAM72C	1328.61	-0.129719	0.0755987	0.269678	360.719	-0.491649	0.109614	4.29264e-05	1757.94	-1.29063	0.196687	4.18488e-10	1339.88	-3.53901	0.22105	4.0986e-56	Gran-specific TNF	Conserved diff
ENSG00000266338	NBPF15	346.127	0.817296	0.138061	8.56373e-08	285.471	0.858686	0.123056	3.47754e-11	599.322	-0.28599	0.111479	0.0260055	553.706	-0.508495	0.138811	0.000755355	Conserved TNF	Conserved diff
ENSG00000196369	SRGAP2B	887.374	-0.0141381	0.0820813	0.938647	1186.57	0.263746	0.0712956	0.00100555	1510.88	0.567355	0.20556	0.0155744	1678.74	0.843843	0.208051	0.000169439	Gran-specific TNF	Conserved diff
ENSG00000215784	FAM72D	1189.25	-0.0189802	0.0817206	0.913778	332.171	-0.532365	0.115987	2.70463e-05	1143.41	-1.36942	0.200158	6.55334e-11	883.418	-3.57721	0.226861	1.86839e-54	Gran-specific TNF	Conserved diff
ENSG00000272419	AC241585.2	354.247	0.301812	0.116695	0.0572427	645.892	-0.12094	0.0883194	0.316548	744.597	0.634556	0.124589	1.89538e-06	580.954	0.0250852	0.129043	0.894232	NA	ATRA-specific
ENSG00000162825	NBPF20	171.47	0.704605	0.158279	0.000136199	159.805	0.697087	0.185309	0.000799697	547.694	-0.338115	0.143373	0.0431929	551.537	-0.276103	0.164364	0.156804	Conserved TNF	ATRA-specific
ENSG00000272150	NBPF25P	87.0652	0.730969	0.221101	0.00872291	86.2241	1.07412	0.216115	4.53791e-06	474.188	0.00920812	0.121272	0.962909	420.675	-0.320723	0.143905	0.0515281	Conserved TNF	NA
ENSG00000117262	GPR89A	1895.38	0.191628	0.0697872	0.0394147	1090.29	-0.146963	0.0682582	0.082346	2208.27	-0.628118	0.11949	8.26019e-07	2007.1	-0.957709	0.147574	5.20221e-10	Pro-specific TNF	Conserved diff
ENSG00000265491	RNF115	2044.46	0.0723666	0.0629576	0.516756	2049.9	0.259329	0.0610614	0.000119049	3589.59	-0.247383	0.0921409	0.01904	3930.46	0.0598889	0.106735	0.676089	Gran-specific TNF	ATRA-specific
ENSG00000186141	POLR3C	2009.23	0.0597869	0.0663596	0.632782	1318.6	-0.11549	0.06587	0.176425	3321.85	-0.457254	0.137293	0.002786	3464.47	-0.278929	0.163112	0.148558	NA	ATRA-specific
ENSG00000186364	NUDT17	52.2399	0.480857	0.274946	0.257585	71.6392	-0.302803	0.224394	0.325228	163.451	0.43745	0.167737	0.0233164	169.625	0.5616	0.185685	0.00627667	NA	Conserved diff
ENSG00000271601	LIX1L	2084.17	-0.131094	0.0659544	0.178238	1688.76	-0.226349	0.0623265	0.00128029	3143.41	-0.132199	0.114953	0.380871	3294.44	0.0415812	0.146746	0.841508	Gran-specific TNF	NA
ENSG00000121851	POLR3GL	209.4	-0.056473	0.146549	0.850183	346.729	-0.37551	0.106914	0.00193917	1070.04	0.256666	0.259182	0.461673	1160.35	0.490994	0.276207	0.131414	Gran-specific TNF	NA
ENSG00000265972	TXNIP	2543.79	-0.244392	0.0626459	0.00119687	9431.03	-0.708309	0.0449552	3.23706e-54	25570.2	2.17181	0.164402	2.63936e-38	46280.3	3.18315	0.193067	1.84042e-59	Conserved TNF	Conserved diff
ENSG00000271425	NBPF10	908.178	1.5647	0.112293	5.45102e-42	1049.62	1.38364	0.0703348	3.17177e-84	1542.32	0.960845	0.0900029	2.7857e-25	1084.81	0.134273	0.115199	0.348515	Conserved TNF	ATRA-specific
ENSG00000213240	AC239799.1	27.5143	1.16415	0.386345	0.0198873	28.2493	1.25082	0.380549	0.00410884	27.4459	1.10849	0.495189	0.0569157	19.6526	0.385714	0.566799	0.606444	Conserved TNF	NA
ENSG00000264343	NOTCH2NL	766.789	1.63714	0.111711	1.98993e-46	955.641	1.1348	0.0960402	9.78934e-31	425.2	1.30702	0.427239	0.00656057	254.623	0.15427	0.433847	0.798145	Conserved TNF	ATRA-specific
ENSG00000268043	NBPF12	622.98	0.464885	0.101925	8.69187e-05	1507.25	0.294184	0.0692363	0.000118038	1994.93	0.988531	0.153511	9.20959e-10	1743.2	0.716395	0.16873	7.75557e-05	Conserved TNF	Conserved diff
ENSG00000131791	PRKAB2	818.155	0.0803496	0.0888087	0.630769	762.707	0.605867	0.0832963	4.38788e-12	1502.47	-0.26158	0.0964187	0.0176709	1589.39	-0.0506507	0.111747	0.740278	Gran-specific TNF	ATRA-specific
ENSG00000131778	CHD1L	3791.8	0.0113887	0.0575891	0.92785	2097.02	-0.13214	0.0569929	0.0574181	7638.4	-0.640794	0.130779	4.88655e-06	8450.67	-0.255546	0.151665	0.155333	NA	ATRA-specific
ENSG00000116128	BCL9	187.913	0.799146	0.156225	6.45863e-06	104.198	-0.0960151	0.192911	0.764252	484.417	-0.096243	0.21162	0.76204	726.061	0.954966	0.22695	9.08408e-05	Pro-specific TNF	TPA-specific
ENSG00000162836	ACP6	42.2684	-0.193186	0.32567	0.766465	29.2397	-1.18466	0.36588	0.00479825	214.609	-0.775704	0.157471	4.30723e-06	153.763	-2.75195	0.221336	3.404e-34	Gran-specific TNF	Conserved diff
ENSG00000188092	GPR89B	879.535	-0.0436159	0.0884162	0.806507	705.047	-0.0707009	0.0824188	0.569691	1024.44	-0.441502	0.0937537	1.20354e-05	891.124	-0.919274	0.118072	5.50163e-14	NA	Conserved diff
ENSG00000206585	RNVU1-7	24.037	0.628277	0.444165	0.394309	22.7967	1.35164	0.451395	0.0100574	13.4364	-0.486745	0.46916	0.437208	10.1373	-1.7528	0.642992	0.0148241	Gran-specific TNF	TPA-specific
ENSG00000263956	NBPF11	816.739	0.342779	0.0884681	0.00132107	1065	0.136453	0.0719799	0.137022	1716.93	0.474827	0.154632	0.00633877	1534.65	0.22036	0.16679	0.281033	Pro-specific TNF	ATRA-specific
ENSG00000274020	LINC01138	358.388	0.098475	0.119823	0.665662	570.56	-0.157553	0.0938628	0.200108	502.589	-0.0416646	0.164395	0.87308	393.788	-0.826718	0.180578	1.81992e-05	NA	TPA-specific
ENSG00000274210	U1	128.497	0.146787	0.184131	0.676072	130.996	0.762275	0.172893	6.00721e-05	5.13568	0.694623	0.670243	0.437813	2.74515	-1.26572	1.05078	0.331054	Gran-specific TNF	NA
ENSG00000270629	NBPF14	3769.12	1.28772	0.0763122	1.54551e-61	4272.65	1.05417	0.0580298	6.83963e-72	5071.39	0.880026	0.0922147	2.2235e-20	3706.27	0.141217	0.109104	0.292543	Conserved TNF	ATRA-specific
ENSG00000177144	NUDT4P1	555.872	-0.0264431	0.101781	0.903098	348.543	-0.724833	0.111644	8.84974e-10	652.702	0.198779	0.175952	0.390943	1575.65	2.0879	0.183549	8.93452e-29	Gran-specific TNF	TPA-specific
ENSG00000269713	NBPF9	524.357	0.538991	0.100025	1.60672e-06	296.894	1.06007	0.123116	1.25293e-16	846.877	-0.591063	0.178089	0.00289237	1076.49	0.193987	0.185754	0.407678	Conserved TNF	ATRA-specific
ENSG00000274265	AC245297.3	120.339	0.479125	0.189896	0.065373	179.152	0.247372	0.155265	0.22863	133.542	-0.115349	0.188405	0.672353	104.738	-0.935944	0.242545	0.00036478	NA	TPA-specific
ENSG00000271383	NBPF19	2824.54	1.47863	0.0924548	2.74144e-55	2607.87	1.61038	0.0724553	2.04949e-107	2002.02	0.158167	0.0896871	0.148841	1711.26	-0.266257	0.112654	0.0376393	Conserved TNF	TPA-specific
ENSG00000277147	LINC00869	586.137	0.0293021	0.0964962	0.885511	663.052	-0.255105	0.0854279	0.0102854	1078.32	-0.0178835	0.201592	0.956316	880.074	-0.643248	0.228604	0.0116035	Gran-specific TNF	TPA-specific
ENSG00000275557	AC242842.1	96.926	0.255598	0.241112	0.55894	113.033	-0.192235	0.190082	0.488399	58.2927	-0.792768	0.258847	0.00649342	66.3078	-0.301692	0.27562	0.382896	NA	ATRA-specific
ENSG00000206828	U1	45.2613	-0.330272	0.321551	0.574085	36.741	0.766014	0.320211	0.048438	8.67963	-1.07853	0.521439	0.0823132	7.47938	-1.76578	0.643411	0.0140846	Gran-specific TNF	TPA-specific
ENSG00000150337	FCGR1A	278.196	0.12011	0.142665	0.657163	411.504	-0.882075	0.119541	2.0494e-12	1904.56	0.612928	0.22624	0.0178416	2379.33	1.13411	0.258414	4.2152e-05	Gran-specific TNF	Conserved diff
ENSG00000203814	HIST2H2BF	20786	-0.0564515	0.0678107	0.660815	9922.19	0.0922601	0.0561614	0.211997	63.4459	0.94896	0.252646	0.000626381	46.2872	0.220032	0.282582	0.550378	NA	ATRA-specific
ENSG00000270882	HIST2H4A	36432.4	-0.0324844	0.154016	0.922589	18429.9	0.153504	0.0557491	0.0197272	212.553	1.21546	0.188076	7.95076e-10	169.419	0.740926	0.236552	0.00451571	Gran-specific TNF	Conserved diff
ENSG00000203811	HIST2H3C	37909	0.237045	0.0599921	0.000996866	17460.6	0.0987746	0.0533182	0.148442	23.3267	0.606013	0.316696	0.112401	16.2526	-0.361177	0.418988	0.503617	Pro-specific TNF	NA
ENSG00000203812	HIST2H2AA3	39821.6	0.0545042	0.0623138	0.643584	19425.9	0.171544	0.0531194	0.00492238	176.505	0.574413	0.161183	0.0012599	219.597	1.08774	0.231396	1.03362e-05	Gran-specific TNF	Conserved diff
ENSG00000220323	HIST2H2BD	49.5335	0.0997257	0.288193	0.86706	49.1193	-0.651889	0.29102	0.0686361	74.4548	0.149393	0.24652	0.675405	56.6507	-0.664493	0.285568	0.0410544	NA	TPA-specific
ENSG00000261716	AC239868.2	150.577	0.0122854	0.164659	0.974016	236.101	-0.698342	0.129473	5.33271e-07	688.286	-0.117422	0.110567	0.424777	594.179	-0.552432	0.150178	0.00071501	Gran-specific TNF	TPA-specific
ENSG00000272196	HIST2H2AA4	4122.83	0.0553811	0.0738343	0.697474	2111.56	0.10568	0.131317	0.598551	185.78	0.786892	0.193841	0.00019637	223.554	1.20906	0.237295	1.53252e-06	NA	Conserved diff
ENSG00000203852	HIST2H3A	2784.38	0.195199	0.224785	0.645927	1369.84	0.21414	0.0742147	0.0137703	21.1059	0.544296	0.367631	0.239733	16.0443	-0.159903	0.414722	0.780555	Gran-specific TNF	NA
ENSG00000184678	HIST2H2BE	13509.1	-0.216891	0.0855092	0.0636637	7134.66	0.0775877	0.0533742	0.281501	438.799	1.98382	0.145454	8.74339e-41	514.413	2.28523	0.169949	7.58294e-40	NA	Conserved diff
ENSG00000184260	HIST2H2AC	10165.8	0.131356	0.0548279	0.0852742	6755.84	-0.10923	0.0577411	0.137982	18.5466	0.943931	0.372369	0.0280625	11.3605	-0.350413	0.518031	0.608714	NA	ATRA-specific
ENSG00000143368	SF3B4	2935.5	-0.0753812	0.0742461	0.578963	2059.14	0.0729367	0.0691349	0.467077	5890.82	0.239478	0.110935	0.0678112	6539.7	0.536816	0.177694	0.00633617	NA	TPA-specific
ENSG00000264522	OTUD7B	783.538	0.0213724	0.0892715	0.910828	1195.4	0.200215	0.0680666	0.0117188	1193.71	0.391248	0.117524	0.00279819	1539.41	1.01396	0.132612	1.60366e-13	Gran-specific TNF	Conserved diff
ENSG00000136631	VPS45	832.696	0.0382123	0.100665	0.852932	1228.14	-0.261315	0.0653148	0.000322152	2493.17	0.58867	0.113136	1.08559e-06	2571.56	0.69024	0.136969	2.02861e-06	Gran-specific TNF	Conserved diff
ENSG00000023902	PLEKHO1	1178.2	0.267923	0.0771971	0.00521195	5746.89	-0.0113958	0.0432771	0.881293	11743.7	1.87727	0.22757	1.90367e-15	14174.4	2.23374	0.251507	6.52992e-18	Pro-specific TNF	Conserved diff
ENSG00000143401	ANP32E	9623.17	0.214149	0.0669088	0.0117882	5529.66	0.241272	0.0602218	0.000315381	13773.9	0.103576	0.14685	0.617971	10127.3	-0.879249	0.168108	7.69376e-07	Conserved TNF	TPA-specific
ENSG00000266472	MRPS21	1712.33	0.0349078	0.0843505	0.837404	810.297	-0.0381217	0.0769172	0.765325	3914.28	-0.93332	0.240772	0.000400233	3921.41	-0.880651	0.252421	0.00140721	NA	Conserved diff
ENSG00000117360	PRPF3	2414.97	0.222736	0.0609993	0.00289328	1708.87	0.344093	0.0609433	1.38262e-07	3653.38	-0.199871	0.0877392	0.0520431	3219.55	-0.58021	0.113104	1.28317e-06	Conserved TNF	TPA-specific
ENSG00000163125	RPRD2	2575.84	-0.39146	0.0745231	3.25101e-06	2391.06	-0.421998	0.0748719	1.45816e-07	4954.1	0.302999	0.207686	0.247864	4936.59	0.328388	0.217282	0.208575	Conserved TNF	NA
ENSG00000143374	TARS2	1105.79	-0.111757	0.0780017	0.386388	610.771	-0.472113	0.0906198	1.38055e-06	3101.13	-0.418635	0.127308	0.00319606	2850.61	-0.675606	0.150662	2.77835e-05	Gran-specific TNF	Conserved diff
ENSG00000143369	ECM1	31.7276	-0.0313541	0.359964	0.970276	22.5069	0.230574	0.426065	0.740877	67.6926	0.23622	0.220769	0.420553	286.19	3.0561	0.200421	5.58498e-51	NA	TPA-specific
ENSG00000203804	ADAMTSL4-AS1	70.6732	0.504871	0.240411	0.148272	248.458	0.971772	0.12829	4.85259e-13	28.6136	2.91659	0.507734	5.90738e-08	90.1314	4.73503	0.766493	3.66901e-09	Gran-specific TNF	Conserved diff
ENSG00000143384	MCL1	4862.79	0.138712	0.0548128	0.0642595	10358.7	0.672836	0.0452859	2.83134e-48	17461.8	1.53306	0.122407	1.66603e-34	25244.1	2.23227	0.150048	1.44459e-48	Gran-specific TNF	Conserved diff
ENSG00000143420	ENSA	4123.27	0.033249	0.0627181	0.792226	3994.67	0.23705	0.0552257	9.84303e-05	11963.6	0.0341312	0.216557	0.920493	11122.7	-0.147686	0.242574	0.647999	Gran-specific TNF	NA
ENSG00000143457	GOLPH3L	1158.81	-0.131368	0.0759023	0.263983	883.482	-0.504764	0.0737686	8.79395e-11	2456	-0.380948	0.149935	0.0276639	2178.77	-0.768166	0.174181	3.84345e-05	Gran-specific TNF	Conserved diff
ENSG00000163131	CTSS	1281.19	-0.373304	0.0815635	8.15011e-05	4350.99	-0.417994	0.0470354	1.13067e-17	9438.96	1.46797	0.155357	5.3459e-20	11099.8	1.79955	0.187766	1.07094e-20	Conserved TNF	Conserved diff
ENSG00000143387	CTSK	61.9174	0.229	0.255344	0.634382	160.797	-0.230121	0.159738	0.286904	283.687	0.973775	0.153937	1.87877e-09	355.387	1.46581	0.177654	1.37952e-15	NA	Conserved diff
ENSG00000143437	ARNT	1870.52	-0.0388362	0.0659725	0.767798	2601.39	-0.408118	0.056737	7.79664e-12	5315.49	0.651123	0.175982	0.000771498	4836.65	0.454007	0.184003	0.029175	Gran-specific TNF	Conserved diff
ENSG00000143379	SETDB1	2110.48	-0.0700162	0.0709874	0.592179	2427.19	-0.148488	0.0559069	0.0255176	4467.88	0.432153	0.119162	0.00100906	3817.47	0.0475581	0.130092	0.792094	Gran-specific TNF	ATRA-specific
ENSG00000143418	CERS2	5330.58	-0.0626211	0.0583081	0.551225	2612.26	0.181943	0.0544552	0.0034414	6357.56	-0.786051	0.13945	1.07681e-07	9925.75	0.583254	0.17339	0.00214594	Gran-specific TNF	Opposite diff
ENSG00000143409	MINDY1	101.129	-0.511715	0.201497	0.0633083	843.592	-0.506957	0.0771126	5.21459e-10	1362.99	1.83795	0.120869	1.54365e-50	1189.3	1.60637	0.128525	1.518e-34	Gran-specific TNF	Conserved diff
ENSG00000143363	PRUNE1	437.453	-0.246823	0.111706	0.122019	302.81	-0.346963	0.11623	0.0103141	1116.91	-0.296526	0.118948	0.0311611	983.168	-0.697903	0.153411	2.07621e-05	Gran-specific TNF	Conserved diff
ENSG00000197622	CDC42SE1	2804.9	0.24285	0.0598907	0.000671888	9748.46	0.41596	0.0402499	1.16021e-23	11919.8	2.05694	0.122622	2.29815e-61	16362.5	2.62675	0.139392	2.0585e-77	Conserved TNF	Conserved diff
ENSG00000143458	GABPB2	733.688	-0.078596	0.0912518	0.649519	966.661	-0.0825733	0.0869526	0.520346	1689.55	0.468751	0.146454	0.00423302	1209.3	-0.455812	0.15726	0.00910713	NA	Opposite diff
ENSG00000163154	TNFAIP8L2	351.265	-0.139657	0.121745	0.518163	864.524	-0.664503	0.0749795	1.40124e-17	2303.78	1.69225	0.267995	2.01494e-09	1603.81	0.983209	0.291021	0.00204493	Gran-specific TNF	Conserved diff
ENSG00000163155	LYSMD1	60.3705	0.0371863	0.285561	0.952563	16.7275	0.612671	0.475641	0.352499	337.516	-0.130155	0.162313	0.563391	277.765	-0.752764	0.24568	0.00556166	NA	TPA-specific
ENSG00000143398	PIP5K1A	2326.03	0.188653	0.0613827	0.0167722	2503.69	0.534371	0.0613995	5.61671e-17	5803.92	0.51497	0.133979	0.000453126	5760.38	0.527875	0.154967	0.0018606	Conserved TNF	Conserved diff
ENSG00000159352	PSMD4	3378.64	0.0816912	0.0635512	0.451915	3547.91	0.490653	0.0478172	2.4426e-23	12247.3	0.414024	0.254398	0.188539	11745.1	0.334462	0.276036	0.32797	Gran-specific TNF	NA
ENSG00000143373	ZNF687	818.494	-0.0855973	0.0869997	0.59296	1368.97	-0.150994	0.0709512	0.0867245	3216.62	0.952493	0.150435	1.81195e-09	3448.37	1.12998	0.183258	3.93804e-09	NA	Conserved diff
ENSG00000143393	PI4KB	2126.3	0.1899	0.069326	0.0400907	3152.63	0.516368	0.0529041	3.49268e-21	6054.25	0.631632	0.0912439	3.80351e-11	5356.94	0.360225	0.143952	0.0267383	Conserved TNF	Conserved diff
ENSG00000143390	RFX5	2312.67	0.46144	0.0640659	2.26339e-11	2587.27	0.639858	0.0589601	4.98694e-26	6594.28	-0.00130794	0.109773	0.994321	6319.37	-0.0891176	0.144269	0.64244	Conserved TNF	NA
ENSG00000237976	AL391069.3	37.8461	0.209451	0.318645	0.740316	36.5554	0.663445	0.340497	0.12433	69.0354	-1.09101	0.334944	0.00353249	55.8891	-2.32053	0.386373	1.0341e-08	NA	Conserved diff
ENSG00000159377	PSMB4	5585.4	0.0860472	0.0682383	0.464562	3947.56	0.171371	0.0520081	0.00400044	16649.5	-0.33743	0.259076	0.310817	15233.6	-0.606696	0.285132	0.0644915	Gran-specific TNF	NA
ENSG00000143442	POGZ	3998.98	0.00918004	0.0613466	0.945604	4149.34	0.126906	0.0533257	0.0498501	7931.6	0.144828	0.156173	0.494666	6920.78	-0.214375	0.169091	0.303777	Gran-specific TNF	NA
ENSG00000143375	CGN	121.966	2.43933	0.215701	1.07152e-27	402.852	4.91961	0.183538	5.03338e-156	45.9163	-0.927725	0.272125	0.00214544	32.0622	-3.64147	0.447547	3.47606e-15	Conserved TNF	Conserved diff
ENSG00000143367	TUFT1	37.6533	0.6295	0.345748	0.231934	58.8781	1.47556	0.266613	2.52241e-07	162.318	-0.163645	0.160128	0.445211	185.928	0.253811	0.168988	0.211732	Gran-specific TNF	NA
ENSG00000143376	SNX27	3532.14	-0.0923775	0.0695364	0.432211	3363.26	-0.273389	0.0530538	1.84335e-06	4378.17	0.66434	0.155849	8.54704e-05	3838.53	0.374485	0.170141	0.0548672	Gran-specific TNF	ATRA-specific
ENSG00000143436	MRPL9	1989.2	0.0312094	0.0712953	0.829508	979.461	0.0478759	0.0815571	0.715666	3049.44	-0.718361	0.207602	0.00180642	2933.61	-0.826066	0.236313	0.00137608	NA	Conserved diff
ENSG00000159445	THEM4	1151.56	-0.0603752	0.0857293	0.718638	551.163	-0.469129	0.0912344	1.9478e-06	1787.25	-0.378482	0.100518	0.000605889	1707.73	-0.489655	0.113483	5.79181e-05	Gran-specific TNF	Conserved diff
ENSG00000197747	S100A10	75.3207	-0.158427	0.233955	0.731321	5.09307	-0.235081	0.844414	0.87349	26.9012	-1.54568	0.52866	0.00980722	1128.87	5.82656	0.292122	1.22595e-86	NA	Opposite diff
ENSG00000163191	S100A11	2398.97	-0.285366	0.0701768	0.000646865	6333.42	0.207173	0.0448715	2.39355e-05	10959.7	1.61419	0.219966	2.07309e-12	19208.6	2.6317	0.255768	1.03542e-23	Opposite TNF	Conserved diff
ENSG00000163220	S100A9	663.502	0.190409	0.113936	0.286112	7196.59	0.0381749	0.0488093	0.611609	6912.55	5.28426	0.22065	1.63901e-124	2323.17	3.65252	0.244444	5.49853e-49	NA	Conserved diff
ENSG00000143546	S100A8	170.235	-0.0628902	0.167534	0.854827	3708.43	-0.0760232	0.0559898	0.321317	2532.02	5.15355	0.308325	6.2757e-61	797.244	3.41074	0.315661	4.72941e-26	NA	Conserved diff
ENSG00000197956	S100A6	78.9154	-0.199623	0.234164	0.653019	118.916	-0.000246842	0.179991	0.999469	966.196	-0.819171	0.293214	0.0141667	14734	4.53301	0.313646	6.90828e-46	NA	Opposite diff
ENSG00000196154	S100A4	724.462	-0.495634	0.0985461	9.74168e-06	1354.64	-0.0709504	0.0778004	0.539772	6809.82	-0.625879	0.288875	0.0666668	50788	3.51356	0.304966	1.70997e-29	Pro-specific TNF	TPA-specific
ENSG00000189171	S100A13	56.3281	0.114976	0.287928	0.844309	67.1445	-0.427712	0.246764	0.182625	236.751	-0.0838373	0.259803	0.834549	516.596	1.7184	0.262438	3.57391e-10	NA	TPA-specific
ENSG00000160679	CHTOP	4065.66	0.0331325	0.0614665	0.788757	2543.04	-0.0028434	0.0538548	0.976362	5841.86	-0.141211	0.172749	0.554799	4792.02	-0.780408	0.186211	9.73572e-05	NA	TPA-specific
ENSG00000143553	SNAPIN	428.258	-0.00795759	0.108487	0.974514	419.345	-0.0515481	0.102734	0.762263	1409.8	0.393554	0.177713	0.0599728	1442.18	0.478815	0.211542	0.0475742	NA	TPA-specific
ENSG00000143621	ILF2	9691.14	0.0772355	0.05383	0.385671	3291.89	0.0351187	0.0532391	0.676757	18091.2	-1.07862	0.221287	5.51648e-06	17523.7	-1.174	0.240899	4.5761e-06	NA	Conserved diff
ENSG00000143624	INTS3	2437.87	-0.0510113	0.071091	0.713227	3159.57	0.00660601	0.0516224	0.944548	5627.18	0.700802	0.217694	0.00399007	4013.6	-0.15451	0.221294	0.596073	NA	ATRA-specific
ENSG00000143554	SLC27A3	108.961	-0.358255	0.193988	0.222739	469.74	-0.218415	0.0974934	0.0685955	1118.95	1.88259	0.162366	1.12592e-29	2262.23	3.10301	0.165775	2.16479e-76	NA	Conserved diff
ENSG00000143614	GATAD2B	3372.37	-0.11813	0.0787532	0.356715	3622.21	-0.435618	0.0638446	1.00278e-10	5221.24	0.441244	0.135947	0.00366378	5585.97	0.637309	0.15305	0.000108915	Gran-specific TNF	Conserved diff
ENSG00000198837	DENND4B	1739.09	-0.103774	0.0706891	0.370114	3369.29	-0.00599463	0.0502456	0.948528	10489.8	0.928242	0.125347	1.27223e-12	9043.7	0.619122	0.134197	1.54781e-05	NA	Conserved diff
ENSG00000160741	CRTC2	921.853	0.100424	0.0885304	0.523739	1482.86	0.327712	0.0605281	4.78815e-07	4317.26	0.721574	0.084246	1.40069e-16	4726.46	0.953258	0.112741	2.53682e-16	Gran-specific TNF	Conserved diff
ENSG00000143570	SLC39A1	1860.03	0.432765	0.0832753	4.28865e-06	2641.98	0.527782	0.0520484	8.25786e-23	6386.06	0.503095	0.151766	0.00293121	5578.1	0.184077	0.206891	0.488292	Conserved TNF	ATRA-specific
ENSG00000143578	CREB3L4	94.2857	-0.173544	0.221452	0.681593	59.7688	-0.975118	0.270232	0.00138919	685.598	-0.438936	0.198359	0.0601911	531.558	-1.46505	0.215553	6.92678e-11	Gran-specific TNF	TPA-specific
ENSG00000272654	AL358472.2	40.0394	-0.212724	0.335425	0.74993	18.2358	-0.43687	0.504533	0.565001	141.188	-0.495955	0.170361	0.0101607	122.817	-0.99025	0.189109	7.44785e-07	NA	Conserved diff
ENSG00000177954	RPS27	14555.6	-0.33529	0.237696	0.395649	18547.6	0.383161	0.0566579	1.50128e-10	80280.9	0.0236643	0.286086	0.959313	75439.2	-0.128425	0.301708	0.756766	Gran-specific TNF	NA
ENSG00000143552	NUP210L	24.8051	0.664253	0.413701	0.31297	40.1843	0.763091	0.302041	0.0352099	23.7451	0.168232	0.32584	0.72541	27.7281	0.60176	0.362321	0.162139	Gran-specific TNF	NA
ENSG00000143549	TPM3	17052.3	0.0316185	0.0538219	0.767921	20365.4	0.149116	0.0429624	0.00223606	52548.1	0.724107	0.155921	1.62362e-05	53692.6	0.800394	0.195744	0.000148199	Gran-specific TNF	Conserved diff
ENSG00000264384	RN7SL431P	47.7932	0.0797288	0.316273	0.906418	96.1844	0.597172	0.20371	0.0120715	18.1535	0.771243	0.711369	0.41334	20.0425	1.0329	0.791408	0.288011	Gran-specific TNF	NA
ENSG00000143515	ATP8B2	23.1562	-0.177268	0.402706	0.828505	90.7244	-1.45108	0.221423	5.96286e-10	335.68	1.52675	0.152898	3.17128e-22	300.342	1.33306	0.174828	1.8807e-13	Gran-specific TNF	Conserved diff
ENSG00000160712	IL6R	1880.31	-0.627568	0.0659179	1.07309e-19	3251.71	-1.32381	0.0544296	1.48927e-128	11461.9	2.34149	0.141178	5.33529e-60	6099.77	1.18322	0.17749	1.64392e-10	Conserved TNF	Conserved diff
ENSG00000160714	UBE2Q1	2284.25	0.0336129	0.0616366	0.786427	2900.88	-0.0474123	0.0558036	0.573956	6954.14	0.501871	0.155001	0.00375674	7439.89	0.691623	0.193699	0.00105444	NA	Conserved diff
ENSG00000160710	ADAR	9490.21	0.0417537	0.0610382	0.727605	12621.1	0.0804401	0.0495259	0.217712	31293.3	1.48269	0.160518	3.78503e-19	24076	0.969284	0.174545	1.37756e-07	NA	Conserved diff
ENSG00000163344	PMVK	435.602	-0.276429	0.120504	0.10405	390.498	-0.110323	0.107181	0.479594	1598.98	-0.496945	0.295223	0.171588	1427.41	-0.886194	0.312586	0.0109176	NA	TPA-specific
ENSG00000163346	PBXIP1	343.033	-0.45494	0.118262	0.00145673	1139.43	-1.01105	0.0755198	2.74355e-39	4398.87	1.02127	0.166578	6.21206e-09	5265.08	1.41591	0.205476	3.66426e-11	Conserved TNF	Conserved diff
ENSG00000163348	PYGO2	1042.27	-0.251184	0.0884718	0.0312496	1076.49	-0.316268	0.0707695	4.62401e-05	3812.16	-0.0401488	0.125297	0.83571	3733.9	-0.066173	0.171765	0.780748	Conserved TNF	NA
ENSG00000160691	SHC1	1419.28	-0.0203861	0.0691759	0.888971	1643.97	-0.115813	0.0633329	0.154959	3245.21	0.894535	0.172929	1.26872e-06	3512.12	1.09453	0.195187	1.01898e-07	NA	Conserved diff
ENSG00000173207	CKS1B	2205.91	0.0155735	0.0737601	0.922589	1031.41	0.0590071	0.0736971	0.600858	5479.61	-0.983105	0.274807	0.00120098	4123.26	-2.78462	0.293266	2.47799e-20	NA	Conserved diff
ENSG00000160688	FLAD1	1424.43	0.0620666	0.0764106	0.670042	915.277	0.129679	0.0716033	0.159729	2473.81	-0.583535	0.140119	0.000128275	2669.27	-0.28572	0.167321	0.149249	NA	ATRA-specific
ENSG00000160685	ZBTB7B	1975.42	-0.110197	0.0748905	0.368817	5246.13	-0.141689	0.0485566	0.0125499	8501.17	1.11902	0.104226	1.45809e-25	9422.72	1.35571	0.168086	6.14459e-15	Gran-specific TNF	Conserved diff
ENSG00000143537	ADAM15	5060.99	-0.142019	0.066244	0.137008	682.62	0.116516	0.085617	0.319924	7761.71	-1.87577	0.10777	5.1691e-66	10072.8	-0.574161	0.162053	0.00116519	NA	Conserved diff
ENSG00000243364	EFNA4	53.4158	-0.0419883	0.274824	0.944771	152.156	-0.920037	0.168881	4.00834e-07	398.747	0.492478	0.170278	0.010736	367.766	0.313871	0.208084	0.209602	Gran-specific TNF	ATRA-specific
ENSG00000143590	EFNA3	32.0987	-0.82034	0.362645	0.11046	9.04034	-2.38756	0.771523	0.00747617	112.924	-1.20221	0.242589	3.7273e-06	122.593	-0.802375	0.299017	0.0166502	Gran-specific TNF	Conserved diff
ENSG00000163463	KRTCAP2	190.367	0.171654	0.158593	0.547007	176.901	0.446255	0.156882	0.0153979	532.603	-0.0596717	0.169699	0.818372	470.417	-0.406855	0.245252	0.162694	Gran-specific TNF	NA
ENSG00000185499	MUC1	23.0009	2.50572	0.480404	3.92386e-06	39.6035	2.78651	0.363715	2.54579e-13	127.506	-0.281769	0.247662	0.386937	115.455	-0.566185	0.258809	0.0565047	Conserved TNF	NA
ENSG00000173171	MTX1	762.713	0.205965	0.0870948	0.0908579	390.214	0.178201	0.10131	0.174712	1782.72	-0.551127	0.182585	0.00742368	1969.27	-0.184709	0.21521	0.505549	NA	ATRA-specific
ENSG00000160766	GBAP1	100.03	-0.53249	0.218953	0.0790512	81.4506	-0.453743	0.218575	0.0965438	318.793	0.454138	0.181107	0.0300685	311.004	0.425524	0.193453	0.0550351	NA	ATRA-specific
ENSG00000236675	MTX1P1	399.348	-0.180555	0.109997	0.29819	183.351	0.103566	0.142592	0.641193	1253.31	0.0998416	0.202035	0.738619	1531.44	0.641301	0.241052	0.0177158	NA	TPA-specific
ENSG00000177628	GBA	726.52	-0.0634954	0.0954657	0.737311	1188.65	-0.266455	0.0754279	0.00181039	2824.32	1.47274	0.110774	8.72743e-39	3810.34	2.05561	0.173363	3.5034e-31	Gran-specific TNF	Conserved diff
ENSG00000160767	FAM189B	776.961	-0.258705	0.0944499	0.0400907	175.56	-0.395929	0.152143	0.0292231	2397.55	-1.09598	0.105993	8.95203e-24	2288.8	-1.25756	0.160622	3.93121e-14	Conserved TNF	Conserved diff
ENSG00000116521	SCAMP3	2069.1	0.206785	0.0697895	0.0227413	1145.43	0.0403365	0.0781662	0.753825	4900.44	-0.42258	0.183769	0.0494603	5565.99	0.00856452	0.229212	0.980668	Pro-specific TNF	ATRA-specific
ENSG00000176444	CLK2	1472.3	0.218473	0.0768031	0.0308884	1447.93	0.239017	0.0640639	0.000895888	5364.56	0.0898144	0.100148	0.510935	4155.22	-0.690713	0.134738	1.30677e-06	Conserved TNF	TPA-specific
ENSG00000143630	HCN3	74.8506	0.2928	0.250685	0.507313	89.4719	0.96432	0.21625	4.82104e-05	711.666	-0.0170978	0.210745	0.960075	437.668	-2.06099	0.202745	3.62074e-23	Gran-specific TNF	TPA-specific
ENSG00000160752	FDPS	6047.51	-0.0105287	0.0618466	0.939423	2139.71	0.11119	0.0569605	0.123557	12106.5	0.562036	0.197639	0.0123207	8088.32	-0.568649	0.163635	0.00147435	NA	Opposite diff
ENSG00000225855	RUSC1-AS1	35.6498	0.372302	0.337428	0.538189	101.738	0.471649	0.20677	0.0624902	1146.99	0.964134	0.284049	0.00225789	680.95	-0.363064	0.353682	0.416654	NA	ATRA-specific
ENSG00000160753	RUSC1	861.057	0.000652121	0.0903819	0.997115	605.94	0.481729	0.0864829	2.07356e-07	2252.33	-0.636593	0.128295	3.61972e-06	1806.56	-1.58334	0.186156	1.66518e-16	Gran-specific TNF	Conserved diff
ENSG00000116539	ASH1L	5266.36	0.287356	0.0688558	0.000426785	5993.65	0.524519	0.0505011	6.85236e-24	5096.56	0.428808	0.266845	0.195325	5094.21	0.462688	0.269383	0.146589	Conserved TNF	NA
ENSG00000227773	ASH1L-IT1	30.1772	-0.0500086	0.384215	0.952563	36.2169	0.989437	0.325419	0.00880625	2.87186	-0.596522	0.999711	0.680718	3.34345	-0.0498336	0.960888	0.972539	Gran-specific TNF	NA
ENSG00000235919	ASH1L-AS1	139.285	0.39305	0.179818	0.126824	130.531	0.567322	0.175796	0.00495919	165.002	-0.471496	0.203244	0.0471851	127.35	-1.5382	0.237652	5.81226e-10	Gran-specific TNF	Conserved diff
ENSG00000125459	MSTO1	1150.41	0.0316889	0.0808015	0.846985	376.896	0.398595	0.103563	0.000577926	1772.7	-1.01956	0.101512	1.78119e-22	1699.99	-1.15235	0.116028	3.71402e-22	Gran-specific TNF	Conserved diff
ENSG00000163374	YY1AP1	2130.03	0.215997	0.065389	0.00879247	2012.79	0.343319	0.0615778	2.0218e-07	4405.31	0.10612	0.12527	0.538683	4059.51	-0.0923004	0.144196	0.629515	Conserved TNF	NA
ENSG00000132676	DAP3	3962.15	0.115916	0.0574457	0.170194	2350.39	0.23124	0.0539909	0.000102489	10146.2	-0.798378	0.198641	0.000229567	9734.54	-0.920815	0.21971	9.73462e-05	Gran-specific TNF	Conserved diff
ENSG00000203761	MSTO2P	1002.27	-0.104393	0.0837258	0.472218	288.372	0.432683	0.123288	0.00195652	1137.03	-1.07707	0.151022	8.96975e-12	1127.38	-1.05561	0.163608	6.61486e-10	Gran-specific TNF	Conserved diff
ENSG00000116580	GON4L	2407.62	0.0922913	0.0691571	0.429636	2543.05	0.0997582	0.0598504	0.203867	4657.85	0.344584	0.146881	0.0444546	4525.66	0.304165	0.157153	0.0968938	NA	ATRA-specific
ENSG00000143622	RIT1	497.676	0.286757	0.105891	0.0432178	3827.93	1.50928	0.0477155	3.4032e-217	2230.73	1.94807	0.128003	1.27348e-50	2507.96	2.17858	0.158891	2.16768e-41	Conserved TNF	Conserved diff
ENSG00000132680	KHDC4	2715.14	0.266179	0.0630857	0.000357054	2146.28	0.259492	0.0561365	2.33909e-05	5168.61	-0.167029	0.103107	0.190955	4637.48	-0.476916	0.125495	0.000455517	Conserved TNF	TPA-specific
ENSG00000116584	ARHGEF2	6228.73	-0.0957057	0.0566829	0.279652	15460.7	0.348545	0.04823	6.14662e-12	27830.8	1.19905	0.110531	4.44065e-26	25253.2	1.02006	0.152832	1.56045e-10	Gran-specific TNF	Conserved diff
ENSG00000273002	AL355388.2	44.3151	1.27214	0.313268	0.000660154	154.059	0.971465	0.166261	4.56246e-08	162.422	1.44338	0.186168	9.47778e-14	87.8917	0.0634106	0.244936	0.856341	Conserved TNF	ATRA-specific
ENSG00000163479	SSR2	5540.74	0.0766172	0.0528832	0.378984	7327.61	0.0409303	0.0505566	0.595829	22962.1	0.531071	0.222649	0.040447	16553.6	-0.354368	0.247263	0.236697	NA	ATRA-specific
ENSG00000160803	UBQLN4	2124.22	0.0749298	0.0747789	0.585002	1928.35	0.821548	0.0595941	1.24401e-41	5584.49	0.417028	0.102778	0.000197855	4393.51	-0.217641	0.152644	0.239372	Gran-specific TNF	ATRA-specific
ENSG00000254726	MEX3A	98.7036	-0.132869	0.221578	0.764273	37.34	-0.0638346	0.332397	0.916498	268.003	-1.55076	0.195049	2.06963e-14	220.975	-3.0556	0.214107	9.20758e-45	NA	Conserved diff
ENSG00000160789	LMNA	1391.78	0.0375792	0.0833498	0.824935	340.553	1.05766	0.115101	7.57621e-19	1447.98	-2.39409	0.236232	7.24271e-23	9338.47	2.75802	0.256544	8.42985e-26	Gran-specific TNF	Opposite diff
ENSG00000196189	SEMA4A	1643.82	0.995446	0.0751132	5.49793e-38	74.4713	3.84089	0.323838	5.7833e-31	2030.76	-2.89962	0.15988	1.26363e-71	4559.52	0.658754	0.171431	0.000388117	Conserved TNF	Opposite diff
ENSG00000160785	SLC25A44	1338.28	0.184028	0.0734174	0.0676558	1566.26	0.584381	0.0703046	1.51029e-15	2606.41	0.572651	0.104383	2.46401e-07	3201.92	1.06582	0.144901	1.38894e-12	Gran-specific TNF	Conserved diff
ENSG00000160783	PMF1	561.103	0.118331	0.0968261	0.483673	341.378	0.0823699	0.109405	0.627047	633.667	-0.648754	0.246696	0.0220328	574.885	-0.994702	0.260382	0.000422714	NA	Conserved diff
ENSG00000160781	PAQR6	22.3856	0.388909	0.457973	0.654298	52.7733	0.648518	0.27166	0.0490318	96.6799	0.3928	0.208924	0.119913	117.019	0.878442	0.22826	0.000379521	Gran-specific TNF	TPA-specific
ENSG00000198952	SMG5	4341.1	0.0605545	0.0616842	0.593869	3270.9	0.443625	0.0511188	6.96916e-17	10160.4	-0.20786	0.0845433	0.0338922	10506.1	-0.0689231	0.14181	0.720369	Gran-specific TNF	ATRA-specific
ENSG00000163472	TMEM79	152.056	0.113886	0.177309	0.746727	126.39	-0.120683	0.174401	0.659888	432.977	-0.190533	0.185721	0.443063	384.738	-0.543292	0.201838	0.0162848	NA	TPA-specific
ENSG00000198715	GLMP	182.949	0.00315763	0.155808	0.993081	203.535	-0.34382	0.14383	0.0486164	536.766	0.387771	0.109513	0.00136361	790.531	1.28702	0.178252	3.68714e-12	Gran-specific TNF	Conserved diff
ENSG00000163468	CCT3	14796.8	0.0486143	0.0608653	0.675358	5011.21	0.136064	0.0455529	0.0102659	23062	-1.19861	0.186098	9.14005e-10	25866	-0.669365	0.222298	0.00652583	Gran-specific TNF	Conserved diff
ENSG00000116604	MEF2D	2396.35	-0.380466	0.0720518	2.81965e-06	835.114	-0.270506	0.0824735	0.00419941	4801.47	-0.788085	0.128891	6.85586e-09	12517.4	1.66458	0.171766	3.84398e-21	Conserved TNF	Opposite diff
ENSG00000183856	IQGAP3	1592.84	0.0419081	0.0762363	0.784401	1323.27	0.16829	0.0645277	0.0287855	3989.88	0.158698	0.228004	0.623658	3523.17	-0.160445	0.226175	0.589744	Gran-specific TNF	NA
ENSG00000163382	NAXE	1366.8	-0.10612	0.0757915	0.400249	629.61	0.143244	0.0931479	0.24855	2707.64	-1.03858	0.263086	0.00030412	3583.34	-0.0162309	0.291451	0.970102	NA	ATRA-specific
ENSG00000160818	GPATCH4	2622.2	0.224163	0.0635508	0.00436113	815.806	0.401311	0.0792594	2.89329e-06	3428.26	-1.71748	0.207734	1.6367e-15	4025.3	-0.866309	0.235395	0.000710358	Conserved TNF	Conserved diff
ENSG00000272068	AL365181.2	21.7567	-0.720595	0.455521	0.323123	537.299	0.0962515	0.0910658	0.466049	324.578	1.70662	0.148406	3.30403e-29	844.425	3.35507	0.15663	8.22155e-100	NA	Conserved diff
ENSG00000272405	AL365181.3	136.274	-0.501726	0.177456	0.0322198	1758.93	0.341214	0.0648039	1.03917e-06	1013.8	1.61243	0.121746	1.69493e-38	2535.63	3.21359	0.149211	6.8354e-101	Opposite TNF	Conserved diff
ENSG00000229953	AL590666.2	64.4975	-0.232737	0.250049	0.618386	586.682	0.378198	0.105317	0.00147721	195.472	1.97698	0.29874	2.90653e-10	436.027	3.34466	0.303093	3.91314e-27	Gran-specific TNF	Conserved diff
ENSG00000143319	ISG20L2	3128.12	0.207813	0.0633854	0.00946277	1787.38	0.322451	0.0635019	2.69259e-06	4712.12	-0.5661	0.124887	2.67656e-05	5174.62	-0.213335	0.172787	0.317745	Conserved TNF	ATRA-specific
ENSG00000143303	RRNAD1	351.407	-0.423091	0.119348	0.00412155	461.61	-0.709053	0.100035	1.62146e-11	1829.41	0.0188022	0.158809	0.941179	1771.4	-0.0408522	0.17523	0.871682	Conserved TNF	NA
ENSG00000143314	MRPL24	1416.63	0.0295031	0.0886731	0.872959	613.347	0.454953	0.0904731	3.42153e-06	2279.36	-1.37084	0.264688	1.22808e-06	2443.87	-0.992325	0.289709	0.00174857	Gran-specific TNF	Conserved diff
ENSG00000143321	HDGF	15325.7	0.185656	0.0560245	0.0085451	9278.07	0.857093	0.0447267	5.98523e-80	26772.7	-0.472882	0.200521	0.0431929	25053.7	-0.670423	0.233154	0.00972012	Conserved TNF	Conserved diff
ENSG00000143294	PRCC	2972.21	0.0373258	0.0623371	0.764548	1600.34	0.118723	0.0631269	0.140749	4472.73	-0.426745	0.165098	0.0247606	4777.13	-0.177431	0.207342	0.506939	NA	ATRA-specific
ENSG00000132694	ARHGEF11	219.667	-0.0460161	0.143392	0.878522	527.342	0.251656	0.103154	0.0434156	599.164	0.79096	0.242525	0.00348556	645.589	0.986973	0.248837	0.000241417	Gran-specific TNF	Conserved diff
ENSG00000117036	ETV3	1501.6	-0.02024	0.0719502	0.89484	1482.94	0.290956	0.0741824	0.00043725	2147.36	0.357535	0.130232	0.0162225	2797.2	1.00683	0.155821	6.23111e-10	Gran-specific TNF	Conserved diff
ENSG00000158473	CD1D	65.9521	-0.843092	0.259959	0.0104764	2936.12	-1.64678	0.0537323	6.60184e-204	5479.18	7.28567	0.165662	0	257.152	2.68242	0.210469	6.8918e-36	Conserved TNF	Conserved diff
ENSG00000163554	SPTA1	24.1971	1.01215	0.407027	0.0706398	479.622	0.262464	0.094861	0.0190276	254.755	4.82794	0.250098	4.58082e-81	29.6138	1.34101	0.373963	0.000997692	Gran-specific TNF	Conserved diff
ENSG00000163563	MNDA	2623.95	-0.0570945	0.0701429	0.6696	1907.98	-1.19996	0.0671194	1.21045e-69	10071.6	1.34723	0.16508	3.88324e-15	5271.55	-0.189869	0.189921	0.43048	Gran-specific TNF	ATRA-specific
ENSG00000163565	IFI16	766.936	-0.124477	0.0932584	0.429597	1601.24	-0.637211	0.0658832	8.24883e-21	4184.48	1.52099	0.15109	1.42208e-22	4019.2	1.46538	0.187167	3.93122e-14	Gran-specific TNF	Conserved diff
ENSG00000158716	DUSP23	372.82	-0.147276	0.154083	0.607403	332.611	0.300114	0.121599	0.0405925	629.086	-0.412722	0.297665	0.275942	699.535	-0.047947	0.325066	0.919623	Gran-specific TNF	NA
ENSG00000158714	SLAMF8	32.5891	-0.192755	0.377082	0.800051	495.383	2.93817	0.113992	2.64847e-144	180.948	6.14447	0.339306	2.06806e-71	1924.85	9.59615	0.379749	1.22663e-138	Gran-specific TNF	Conserved diff
ENSG00000213085	CFAP45	45.8021	-0.0108094	0.294498	0.988151	38.0262	0.817667	0.310868	0.0272433	58.662	-0.323243	0.2409	0.29426	90.3906	0.850777	0.240671	0.00119857	Gran-specific TNF	TPA-specific
ENSG00000158710	TAGLN2	16095	-0.0637166	0.0598783	0.556715	10268.5	0.283404	0.0454351	4.32774e-09	35215.3	-0.569831	0.188711	0.0074014	41891.5	0.0198166	0.227116	0.952513	Gran-specific TNF	ATRA-specific
ENSG00000260766	AL513302.2	155.57	0.134128	0.16968	0.678527	113.48	-0.367055	0.185983	0.11847	363.108	-0.674813	0.168537	0.00024359	308.194	-1.33019	0.185692	5.52118e-12	NA	Conserved diff
ENSG00000143315	PIGM	821.186	-0.0813975	0.0929333	0.642991	638.695	-0.144133	0.0871849	0.20856	1654.48	-0.281827	0.110997	0.0277774	1352.11	-0.974587	0.125255	5.71098e-14	NA	Conserved diff
ENSG00000162729	IGSF8	268.537	0.437966	0.136624	0.0116343	250.774	2.05951	0.160336	3.25997e-36	881.5	-1.12817	0.221307	1.85227e-06	1176.99	-0.047116	0.254222	0.89928	Conserved TNF	ATRA-specific
ENSG00000162734	PEA15	270.669	0.6185	0.127692	2.36391e-05	313.016	0.817787	0.113285	6.49493e-12	985.199	-0.0606083	0.153426	0.794935	3433.23	2.56298	0.185136	3.52973e-42	Conserved TNF	TPA-specific
ENSG00000132716	DCAF8	2380.53	0.119636	0.0656747	0.231556	1821.78	-0.339087	0.0656861	1.76116e-06	5191.34	-0.138185	0.098167	0.267635	5044.2	-0.187085	0.142697	0.285353	Gran-specific TNF	NA
ENSG00000162735	PEX19	886.616	0.0831891	0.0799233	0.56762	725.997	-0.0328777	0.0793929	0.806786	1860.68	0.129945	0.12897	0.452463	2285.15	0.680519	0.158378	6.24079e-05	NA	TPA-specific
ENSG00000122218	COPA	6714.77	0.0416336	0.053105	0.681502	6809.56	0.243178	0.0486688	4.00382e-06	15767.5	0.340812	0.186887	0.133396	16071.7	0.423186	0.201006	0.067765	Gran-specific TNF	NA
ENSG00000202078	Y_RNA	26.3566	0.165895	0.418833	0.845678	39.6116	0.0823381	0.314273	0.882047	2.37842	0.525694	0.931941	0.698751	4.75017	1.96595	0.835729	0.0386506	NA	TPA-specific
ENSG00000162736	NCSTN	1430.39	0.0328605	0.0804555	0.8403	2331.6	-0.154022	0.0526279	0.0122364	5859.31	1.02268	0.120299	2.39561e-16	8019.04	1.67941	0.168369	2.43935e-22	Gran-specific TNF	Conserved diff
ENSG00000162739	SLAMF6	52.4269	-0.625876	0.285343	0.125506	46.9438	-2.12003	0.317602	2.68388e-10	353.208	-0.502889	0.145851	0.00188379	1045.54	2.04015	0.179886	1.30108e-28	Gran-specific TNF	Opposite diff
ENSG00000066294	CD84	1789.84	-0.197905	0.0642166	0.0163427	2542.6	0.318069	0.057194	2.18095e-07	6529.64	-0.11511	0.28439	0.789957	14525.9	1.73913	0.28389	5.01174e-09	Opposite TNF	TPA-specific
ENSG00000117091	CD48	1304.45	0.494288	0.0761208	2.63957e-09	4091.21	0.947351	0.0529368	8.80753e-70	5395.07	0.0663305	0.249712	0.866514	5332.65	0.0638956	0.274506	0.871883	Conserved TNF	NA
ENSG00000122223	CD244	654.775	0.368568	0.0888033	0.000466182	1172.34	-0.358261	0.0749169	1.11581e-05	2780.56	0.601577	0.123019	5.115e-06	2812.45	0.656829	0.159974	0.000138296	Opposite TNF	Conserved diff
ENSG00000158769	F11R	403.226	-0.130554	0.106589	0.482449	2047.96	-0.0181793	0.0620831	0.867159	5102.58	1.74784	0.174733	2.6757e-22	3733.25	1.15403	0.20448	8.33937e-08	NA	Conserved diff
ENSG00000215845	TSTD1	160.946	-0.317771	0.169835	0.214619	82.2607	0.360376	0.238355	0.258374	550.117	-1.54544	0.288761	5.02055e-07	592.719	-1.1144	0.302649	0.000705382	NA	Conserved diff
ENSG00000158773	USF1	1397.63	-0.0238911	0.0816725	0.889739	2020.24	-0.0646586	0.0551368	0.407201	5137.88	0.985359	0.17446	1.01199e-07	3851.53	0.332851	0.194998	0.149422	NA	ATRA-specific
ENSG00000186517	ARHGAP30	2230.72	-0.258921	0.0633469	0.000598958	5267.21	-0.119858	0.0466438	0.0316885	14190.7	0.880281	0.141328	3.4106e-09	15761.7	1.13284	0.178173	1.19998e-09	Conserved TNF	Conserved diff
ENSG00000143256	PFDN2	1485.92	0.0875189	0.174686	0.803085	649.561	0.207894	0.0841088	0.0402289	3641.27	-1.01646	0.273943	0.000743173	4178.62	-0.447963	0.294103	0.204773	Gran-specific TNF	ATRA-specific
ENSG00000158793	NIT1	253.218	-0.0737224	0.134713	0.785691	461.162	-0.028405	0.104051	0.876838	1385.23	0.518868	0.156036	0.00283176	1297.15	0.383877	0.168311	0.0457259	NA	Conserved diff
ENSG00000158796	DEDD	621.017	0.121224	0.0954626	0.460051	845.894	0.232401	0.077587	0.0100307	1875.33	0.731854	0.137499	5.85464e-07	2057.4	0.965849	0.169079	5.68013e-08	Gran-specific TNF	Conserved diff
ENSG00000143258	USP21	783.146	0.0325745	0.0915205	0.863476	493.402	-0.282923	0.0958229	0.0113473	2433.88	-0.418983	0.096536	6.16937e-05	2310.32	-0.557471	0.129556	6.09092e-05	Gran-specific TNF	Conserved diff
ENSG00000143224	PPOX	159.115	-0.225343	0.165507	0.416784	145.502	-0.533304	0.161755	0.00397424	1032.43	-0.36347	0.143803	0.0285845	1078.93	-0.184923	0.156776	0.342338	Gran-specific TNF	ATRA-specific
ENSG00000158850	B4GALT3	1133.91	0.0132968	0.0813145	0.941035	797.558	-0.172517	0.0795282	0.0797032	2868.84	-0.268079	0.179042	0.233439	3909.24	0.606858	0.212224	0.0101703	NA	TPA-specific
ENSG00000158864	NDUFS2	2646.59	-0.0759204	0.0645031	0.503597	2186.34	-0.193828	0.0560534	0.00233403	7958.11	-0.0843584	0.214314	0.795552	8218.22	0.0415529	0.237588	0.905218	Gran-specific TNF	NA
ENSG00000158869	FCER1G	263.973	0.0452841	0.130502	0.866894	6421.79	0.12955	0.0582983	0.071315	9412.74	4.73783	0.250543	8.10731e-78	21144.3	5.95077	0.277368	3.98729e-100	NA	Conserved diff
ENSG00000158882	TOMM40L	1092.58	0.0250436	0.0791868	0.880214	1330.27	0.0749503	0.0705982	0.46351	2178.1	0.609725	0.153057	0.00026388	1831.04	0.199376	0.181657	0.381495	NA	ATRA-specific
ENSG00000158887	MPZ	191.38	0.238607	0.154337	0.337698	550.986	0.471363	0.0947799	4.47184e-06	1010.85	1.29598	0.164083	3.10353e-14	750.753	0.673961	0.194909	0.00156484	Gran-specific TNF	Conserved diff
ENSG00000143226	FCGR2A	640.497	-0.0785621	0.0976551	0.673171	593.132	-0.694767	0.0940653	1.94776e-12	1532.06	0.0960285	0.159969	0.678818	4452.28	2.34673	0.159402	1.41371e-47	Gran-specific TNF	TPA-specific
ENSG00000173110	HSPA6	26.1421	-0.565852	0.397966	0.391577	34.8926	-1.1982	0.348476	0.00249101	94.8591	2.10153	0.281116	7.57433e-13	100.854	2.23294	0.25741	3.94401e-17	Gran-specific TNF	Conserved diff
ENSG00000162746	FCRLB	23.6756	0.0377879	0.432725	0.970227	55.4232	0.420677	0.262785	0.225963	131.044	1.896	0.308054	5.37558e-09	2734.46	6.63437	0.200281	7.87656e-238	NA	Conserved diff
ENSG00000081721	DUSP12	920.37	0.0644104	0.0833256	0.687211	522.47	0.202268	0.092309	0.0761684	1972.07	-0.666147	0.223053	0.00816037	2009.25	-0.557816	0.236699	0.0382686	NA	Conserved diff
ENSG00000118217	ATF6	2350.05	0.118988	0.0658263	0.237363	2907.99	-0.091372	0.0542833	0.198492	4997.12	0.482336	0.119197	0.000206701	5238.98	0.627588	0.14751	7.47233e-05	NA	Conserved diff
ENSG00000229808	AL391825.1	41.0278	0.102686	0.315336	0.876227	58.4902	0.630161	0.260209	0.0452281	21.4488	-0.238236	0.332535	0.611308	20.9705	-0.267138	0.392589	0.606444	Gran-specific TNF	NA
ENSG00000152332	UHMK1	7522.69	0.142281	0.0547885	0.0557105	9945.4	-0.0199818	0.0408705	0.7694	12829.8	0.667098	0.205698	0.00369489	12615.2	0.658853	0.21242	0.00495913	NA	Conserved diff
ENSG00000117143	UAP1	2367.71	0.191086	0.0642395	0.0220512	799.797	0.920969	0.0773807	3.55631e-31	2048.37	-1.19682	0.190449	2.43141e-09	2250.23	-0.747122	0.215717	0.00153387	Conserved TNF	Conserved diff
ENSG00000162733	DDR2	52.7313	0.286315	0.272538	0.563548	40.0456	1.89258	0.3585	9.68086e-07	32.472	0.183103	0.329438	0.703157	45.9619	1.03752	0.276687	0.000550489	Gran-specific TNF	TPA-specific
ENSG00000132196	HSD17B7	511.953	-0.0292514	0.100333	0.889998	379.808	-0.292226	0.111548	0.0279653	1981.63	0.350253	0.177187	0.099283	1665.32	-0.0976425	0.157047	0.63996	Gran-specific TNF	NA
ENSG00000232995	RGS5	170.42	0.046118	0.157942	0.889747	145.793	-0.252605	0.164573	0.24967	85.0247	-0.0389753	0.197655	0.901562	55.5728	-1.70458	0.275093	3.27179e-09	NA	TPA-specific
ENSG00000143228	NUF2	1668.17	0.119439	0.0703062	0.276374	889.767	-0.179835	0.0770058	0.0551706	2628.1	-0.32905	0.181728	0.136599	1607.26	-3.17038	0.193178	6.31949e-59	NA	TPA-specific
ENSG00000143198	MGST3	743.945	-0.14598	0.100333	0.375409	363.777	0.212051	0.10656	0.114616	1708.51	-1.05978	0.245518	6.81901e-05	1886.45	-0.617953	0.262406	0.0384101	NA	Conserved diff
ENSG00000143149	ALDH9A1	1551.58	0.0439007	0.0842952	0.796087	848.757	-0.314195	0.0799706	0.000426308	3384.58	-0.271809	0.158734	0.163085	3600.17	-0.0476628	0.192388	0.863144	Gran-specific TNF	NA
ENSG00000224358	AL451074.2	43.8302	-0.0775696	0.351546	0.919529	58.1492	-0.238934	0.252014	0.521272	21.9249	0.667356	0.335533	0.0967829	11.2532	-1.5156	0.51843	0.0084648	NA	TPA-specific
ENSG00000143179	UCK2	3207.49	-0.059809	0.0622533	0.604825	987.499	-0.0264341	0.0746458	0.836702	3662.09	-1.25298	0.116069	7.80907e-26	3439.33	-1.51671	0.170358	5.39871e-18	NA	Conserved diff
ENSG00000152382	TADA1	801.429	0.0512676	0.0863378	0.76613	390.254	-0.242077	0.106027	0.0621938	1293.82	-0.661692	0.148156	3.58601e-05	1163.07	-1.04591	0.169615	3.9308e-09	NA	Conserved diff
ENSG00000143195	ILDR2	123.006	-0.420155	0.193659	0.130396	66.0142	-0.458246	0.250913	0.155595	615.653	-1.44151	0.19928	4.38765e-12	625.425	-1.29225	0.209265	3.72221e-09	NA	Conserved diff
ENSG00000143190	POU2F1	3059.61	-0.101328	0.0665888	0.348087	2318.69	0.359566	0.0551331	7.33852e-10	2382.55	0.160384	0.201955	0.567382	2056.72	-0.22936	0.203279	0.366352	Gran-specific TNF	NA
ENSG00000272033	AL136984.1	73.5132	0.166105	0.244772	0.73059	87.2173	0.775621	0.225249	0.00245069	3.03503	-0.942414	1.05996	0.514753	3.37753	-0.468539	1.10439	0.757566	Gran-specific TNF	NA
ENSG00000143162	CREG1	2455.22	0.0373643	0.0643528	0.770246	5043.46	0.138382	0.0490457	0.0164128	16886.5	0.969874	0.197095	4.41637e-06	8059.91	-1.22382	0.224597	2.42071e-07	Gran-specific TNF	Opposite diff
ENSG00000241666	AL031733.2	35.3202	-0.0786064	0.342099	0.914678	145.059	-0.537271	0.169454	0.00590682	177.414	1.67785	0.323053	1.13987e-06	59.737	-1.22018	0.40429	0.00639114	Gran-specific TNF	Opposite diff
ENSG00000198771	RCSD1	1684.37	-0.207873	0.0719824	0.027841	8682.17	-0.806864	0.0465738	1.92254e-65	16928.7	2.05553	0.115968	1.94337e-68	7092.81	0.248029	0.152925	0.17348	Conserved TNF	ATRA-specific
ENSG00000197965	MPZL1	1065.12	-0.0355559	0.0826296	0.832188	290.723	0.000595149	0.120747	0.997932	2143.47	-0.469333	0.162467	0.0108403	2422.81	-0.0415099	0.166536	0.862204	NA	ATRA-specific
ENSG00000224837	GCSHP5	328.783	0.295675	0.130169	0.108526	46.3715	-0.178685	0.278957	0.68664	565.692	-2.315	0.271228	1.80032e-16	537.067	-2.71729	0.29696	5.94573e-19	NA	Conserved diff
ENSG00000143147	GPR161	82.403	-0.251884	0.234041	0.550367	60.4378	0.356771	0.249684	0.291684	154.86	-0.749315	0.176903	9.57207e-05	158.585	-0.612406	0.18818	0.00307383	NA	Conserved diff
ENSG00000143155	TIPRL	2982.2	0.191863	0.066431	0.027841	2288.02	0.164368	0.053793	0.00840781	5214.63	-0.186621	0.16445	0.388325	4915.73	-0.33712	0.196221	0.146459	Conserved TNF	NA
ENSG00000213064	SFT2D2	6958.73	0.0524332	0.0594158	0.640202	5539.1	-0.0522222	0.053094	0.503303	5417.7	0.287184	0.106244	0.0181424	7094.85	0.959956	0.117636	2.87441e-15	NA	Conserved diff
ENSG00000143178	TBX19	169.041	0.0651878	0.178776	0.860072	191.382	-0.146504	0.150476	0.50776	441.361	0.0908193	0.114127	0.566562	498.231	0.44442	0.124118	0.00101739	NA	TPA-specific
ENSG00000143153	ATP1B1	459.469	0.270783	0.105684	0.0603118	2101.92	2.95738	0.0695755	0	558.535	0.359272	0.145344	0.0328005	4818.48	4.24281	0.191524	1.05308e-106	Gran-specific TNF	Conserved diff
ENSG00000143156	NME7	604.963	-0.00126263	0.0951287	0.995441	321.588	-0.148276	0.114407	0.349398	903.753	-1.01366	0.22003	1.92384e-05	998.262	-0.57777	0.237749	0.032013	NA	Conserved diff
ENSG00000117475	BLZF1	1196.35	0.0631867	0.0861889	0.705993	1453	-0.00665818	0.0662697	0.957035	2412.99	0.748785	0.11342	3.22138e-10	2172.25	0.528838	0.128552	0.000133932	NA	Conserved diff
ENSG00000117479	SLC19A2	1248.46	-0.101086	0.0813092	0.473696	345.019	-0.492965	0.108169	3.1316e-05	1738.21	-1.12383	0.10385	5.8736e-26	1416.97	-2.2932	0.136823	2.04877e-61	Gran-specific TNF	Conserved diff
ENSG00000000460	C1orf112	1488.38	0.177324	0.0684174	0.0564359	878.905	0.0131919	0.0791713	0.928457	1186.11	-0.633519	0.148065	7.9944e-05	877.018	-2.10574	0.151913	2.77498e-42	NA	Conserved diff
ENSG00000188404	SELL	23.4416	-0.295535	0.461408	0.747309	689.238	-0.521536	0.0802026	8.29451e-10	3023.41	3.05111	0.170711	1.41919e-69	3081.86	3.10077	0.192021	4.51548e-57	Gran-specific TNF	Conserved diff
ENSG00000171806	METTL18	268.689	0.0115598	0.132274	0.970227	193.667	-0.292116	0.179266	0.21601	635.844	-0.745264	0.250653	0.00847871	530.074	-1.53491	0.264316	3.30984e-08	NA	Conserved diff
ENSG00000000457	SCYL3	434.841	0.12338	0.10414	0.500472	642.742	0.103272	0.0912355	0.427212	1045.87	0.442792	0.151777	0.00998503	1031.21	0.440508	0.160636	0.014165	NA	Conserved diff
ENSG00000075945	KIFAP3	426.892	-0.185391	0.108963	0.27518	408.525	-0.284943	0.105829	0.0231926	882.458	-0.586736	0.167155	0.00152095	865.669	-0.615146	0.195188	0.00425172	Gran-specific TNF	Conserved diff
ENSG00000120370	GORAB	368.969	0.387109	0.113118	0.00609611	443.886	0.0428019	0.102909	0.805893	753.261	0.451968	0.134533	0.00253297	670.279	0.179232	0.14975	0.334435	Pro-specific TNF	ATRA-specific
ENSG00000076258	FMO4	24.4744	-0.206373	0.417004	0.806105	102.364	-0.469619	0.198257	0.0511729	104.498	1.45923	0.193587	4.78534e-13	55.9711	0.0437799	0.259912	0.908995	NA	ATRA-specific
ENSG00000117523	PRRC2C	20044.3	0.192294	0.0726689	0.0498189	16170.2	0.44637	0.0626874	1.29592e-11	21327.6	0.201675	0.278862	0.607735	20945	0.190263	0.276554	0.601855	Conserved TNF	NA
ENSG00000117533	VAMP4	327.705	-0.0852579	0.129955	0.740805	336.645	-0.623033	0.113962	3.61511e-07	1053.56	-0.00849694	0.113225	0.963478	1231.48	0.442843	0.131166	0.00206074	Gran-specific TNF	TPA-specific
ENSG00000010165	METTL13	2070.99	-0.127714	0.0632717	0.170017	923.11	-0.432367	0.073076	2.96684e-08	3346.39	-0.809926	0.132513	6.94926e-09	3256.54	-0.871113	0.174742	2.65476e-06	Gran-specific TNF	Conserved diff
ENSG00000197959	DNM3	71.0011	0.0238389	0.238644	0.965813	65.0645	-0.249617	0.240836	0.476003	80.9104	-0.0454319	0.243012	0.906723	121.404	0.995022	0.236075	8.8222e-05	NA	TPA-specific
ENSG00000135845	PIGC	729.465	0.0259046	0.096987	0.900568	646.53	-0.302283	0.0844673	0.00154298	2491.95	-0.421598	0.191488	0.0617175	2388.43	-0.528756	0.206846	0.0233288	Gran-specific TNF	TPA-specific
ENSG00000094975	SUCO	2052.24	0.0447663	0.0772681	0.771103	2483.76	-0.36112	0.0602817	1.91321e-08	3744.6	0.566088	0.114932	4.31929e-06	4010.29	0.75792	0.130385	3.2028e-08	Gran-specific TNF	Conserved diff
ENSG00000203739	AL645568.1	77.4256	-0.398229	0.225866	0.252797	286.979	-0.429643	0.132838	0.00484858	94.7265	0.141989	0.188004	0.589339	74.3898	-0.583332	0.228812	0.0237351	Gran-specific TNF	TPA-specific
ENSG00000117592	PRDX6	7458.22	-0.0800467	0.0550971	0.376651	3554.03	0.322343	0.0512336	3.10652e-09	13639	-0.772627	0.19718	0.000340606	16644	-0.0639649	0.22961	0.844298	Gran-specific TNF	ATRA-specific
ENSG00000076321	KLHL20	745.99	0.245846	0.0910287	0.0439549	848.894	-0.0272969	0.0771658	0.83684	1560.68	0.661289	0.139028	9.6676e-06	1888.56	1.11404	0.16207	4.10761e-11	Pro-specific TNF	Conserved diff
ENSG00000120334	CENPL	1000.23	0.132223	0.0774314	0.272988	659.447	0.0629432	0.0906806	0.6585	1226.3	-0.427266	0.160511	0.0202516	1014.99	-1.11714	0.158815	1.36813e-11	NA	Conserved diff
ENSG00000117593	DARS2	2223.33	0.00327715	0.0644493	0.983133	864.838	-0.148933	0.0787836	0.138289	2463	-0.451077	0.167617	0.0187117	2030.2	-1.1667	0.181499	7.69289e-10	NA	Conserved diff
ENSG00000234741	GAS5	11371.3	0.240905	0.0571025	0.000357488	5088.91	0.0341119	0.053126	0.68595	27179.1	-0.776927	0.272679	0.0121283	25687.2	-0.963956	0.28285	0.00185043	Pro-specific TNF	Conserved diff
ENSG00000185278	ZBTB37	1565.39	-0.0940506	0.0756134	0.473327	3602.75	-0.46839	0.0498315	1.08776e-19	2705.69	1.35924	0.312159	5.81298e-05	1553.97	0.108497	0.334742	0.816645	Gran-specific TNF	ATRA-specific
ENSG00000135870	RC3H1	4457.89	0.0306019	0.0611406	0.803181	5130.16	0.246304	0.0445282	2.56168e-07	3217.03	0.769708	0.163476	1.20767e-05	3485.37	0.97812	0.17131	5.76881e-08	Gran-specific TNF	Conserved diff
ENSG00000152061	RABGAP1L	1112.9	0.133231	0.0816688	0.301952	1814.56	-0.510242	0.064609	4.15596e-14	2171.91	0.553859	0.0940917	2.62781e-08	2512.24	0.918225	0.1281	5.34326e-12	Gran-specific TNF	Conserved diff
ENSG00000203737	GPR52	49.2843	-0.062248	0.318685	0.928701	64.0061	0.782092	0.265702	0.0116476	2.36948	-2.349	1.1432	0.0846199	3.1322	-0.733754	0.913909	0.536614	Gran-specific TNF	NA
ENSG00000116161	CACYBP	4887.91	0.0247058	0.0601588	0.839527	2364.92	-0.2022	0.0560195	0.00138414	8661.63	-0.531155	0.223225	0.0410305	9714.58	-0.12229	0.24871	0.716916	Gran-specific TNF	ATRA-specific
ENSG00000120333	MRPS14	693.522	-0.0742733	0.0964582	0.688785	622.922	0.0207809	0.0830231	0.887983	1747.16	-0.352417	0.202732	0.15566	1537.82	-0.768048	0.222367	0.0015852	NA	TPA-specific
ENSG00000116147	TNR	31.0879	-0.124433	0.349956	0.863501	908.36	-0.472036	0.0824583	8.92736e-08	888.671	3.19541	0.227867	4.46293e-43	101.895	-2.43892	0.292497	6.71632e-16	Gran-specific TNF	Opposite diff
ENSG00000227740	AL513329.1	26.9422	-0.210825	0.389145	0.78801	43.4739	0.235232	0.307904	0.621399	22.16	0.728866	0.327601	0.0586291	23.3545	0.876251	0.343041	0.0234418	NA	TPA-specific
ENSG00000075391	RASAL2	1143.58	-0.254886	0.0813386	0.0142637	338.057	-0.61673	0.114842	6.03743e-07	1474	-0.963407	0.240845	0.000247179	4547.2	1.8995	0.236211	7.44081e-15	Conserved TNF	Opposite diff
ENSG00000213057	C1orf220	48.601	-0.279231	0.281078	0.588741	61.2008	-0.0912908	0.268265	0.843591	61.9241	-0.166262	0.292936	0.69685	37.0027	-2.71311	0.433619	2.25258e-09	NA	TPA-specific
ENSG00000116191	RALGPS2	996.542	-0.192159	0.0808025	0.0881853	791.986	-0.429525	0.078588	3.64315e-07	1798.97	-0.237433	0.139125	0.164698	1238.05	-1.79348	0.144364	3.85116e-34	Gran-specific TNF	TPA-specific
ENSG00000186283	TOR3A	1790.54	-0.147127	0.0841929	0.258228	1104.42	0.0079248	0.074739	0.954329	4717.08	-0.594892	0.193173	0.00617029	4424.19	-0.794289	0.223445	0.00111632	NA	Conserved diff
ENSG00000143322	ABL2	2124.31	-0.0707142	0.0683698	0.570739	1755.74	0.68037	0.0592062	4.2009e-29	2516.04	-0.406775	0.210023	0.107291	3209.74	0.34304	0.208802	0.167308	Gran-specific TNF	NA
ENSG00000057252	SOAT1	1652.06	-0.0619995	0.0683093	0.629628	1572.15	0.0438815	0.0704996	0.695894	3181.96	0.00908469	0.119737	0.962918	2650.9	-0.531069	0.15256	0.00144465	NA	TPA-specific
ENSG00000169905	TOR1AIP2	6493.94	0.0612567	0.054541	0.528542	4078.64	-0.0666322	0.0516664	0.351844	3686.67	0.00228597	0.0788023	0.98646	4585.04	0.60491	0.100466	9.45149e-09	NA	TPA-specific
ENSG00000143337	TOR1AIP1	2762.95	-0.00811656	0.0624961	0.952658	4078.3	-0.565429	0.0463132	8.93473e-33	7480.25	1.32096	0.126726	3.77931e-24	7289.09	1.29351	0.158877	3.33877e-15	Gran-specific TNF	Conserved diff
ENSG00000135837	CEP350	6918.91	0.0800449	0.0565827	0.394309	5303.5	-0.224555	0.0470566	1.16837e-05	8849.83	0.177303	0.25823	0.628882	8400.57	0.0712572	0.253278	0.842698	Gran-specific TNF	NA
ENSG00000116260	QSOX1	2816.28	-0.256491	0.0673665	0.00167504	6058.9	-0.117041	0.0553661	0.0894065	11870.2	0.933904	0.154647	1.07454e-08	16595.1	1.64007	0.210508	5.28497e-14	Pro-specific TNF	Conserved diff
ENSG00000121454	LHX4	42.5536	-1.67771	0.336123	1.16927e-05	2.58692	-0.585541	1.21093	0.772203	321.062	-1.34473	0.284113	1.07641e-05	277.353	-2.17132	0.33463	5.23419e-10	Pro-specific TNF	Conserved diff
ENSG00000230124	ACBD6	2328.56	-0.0268809	0.0612861	0.829074	1099.9	-0.322893	0.0708103	3.09663e-05	3231.98	-0.897753	0.184009	5.39805e-06	3062.69	-1.0804	0.217498	2.89425e-06	Gran-specific TNF	Conserved diff
ENSG00000143324	XPR1	1667.84	-0.0237968	0.0687353	0.86706	1400.47	-0.0848081	0.0671311	0.363999	2439.43	-0.0985853	0.154315	0.656603	3361.67	0.764987	0.175434	4.75917e-05	NA	TPA-specific
ENSG00000243155	AL162431.2	81.0786	-0.593124	0.224546	0.0502837	66.6403	-0.297716	0.239926	0.374578	98.8855	-0.700919	0.208733	0.0025462	97.3324	-0.715027	0.218973	0.0029659	NA	Conserved diff
ENSG00000232586	KIAA1614-AS1	130.532	-0.452046	0.185806	0.0789425	101.686	-0.782158	0.196805	0.000357634	6.06114	-0.828961	0.798483	0.436888	7.23163	-0.144809	0.955711	0.917586	Gran-specific TNF	NA
ENSG00000135823	STX6	1538.29	-0.262623	0.0722737	0.00306569	1923.15	-0.426344	0.0572967	1.3053e-12	3024.25	0.293618	0.111704	0.0220948	3336.67	0.570693	0.152576	0.00056965	Conserved TNF	Conserved diff
ENSG00000153029	MR1	487.867	-0.252098	0.101637	0.0715392	2460.26	-0.527185	0.0580681	2.04928e-18	3941.81	1.69101	0.123908	7.79603e-41	3006.73	1.18082	0.150389	3.2998e-14	Gran-specific TNF	Conserved diff
ENSG00000162783	IER5	1204.39	1.55229	0.0905613	1.74825e-63	1497.48	2.13749	0.0730251	5.22126e-186	2642.14	-0.0576981	0.20651	0.858433	3961.55	0.980506	0.24427	0.0001999	Conserved TNF	TPA-specific
ENSG00000135821	GLUL	11430.3	-0.474502	0.0503951	2.86247e-19	3487.78	-0.972527	0.0480901	5.49487e-89	21362.8	-0.326022	0.140618	0.0473383	22465.7	-0.129653	0.151761	0.507727	Conserved TNF	ATRA-specific
ENSG00000135828	RNASEL	424.131	-0.406504	0.109938	0.0024639	890.646	-0.264381	0.0735708	0.00146431	1186.06	0.6294	0.117391	4.77014e-07	1275.5	0.826127	0.138864	1.44718e-08	Conserved TNF	Conserved diff
ENSG00000143333	RGS16	679.663	0.359046	0.105915	0.00672329	10.3508	0.00269377	0.659988	0.998235	719.172	-3.31897	0.664244	3.05879e-06	2617.46	1.60968	0.225964	7.31431e-12	Pro-specific TNF	Opposite diff
ENSG00000135838	NPL	200.762	-0.0750602	0.153825	0.808258	123.301	0.146839	0.177079	0.584745	439.137	0.0167481	0.163231	0.949681	1005.19	1.873	0.161656	8.10884e-30	NA	TPA-specific
ENSG00000135862	LAMC1	1039.91	-0.106965	0.0913607	0.506324	855.684	0.372325	0.0847725	6.45866e-05	1469.42	-0.18043	0.199997	0.507899	1339.27	-0.437044	0.200979	0.0581594	Gran-specific TNF	NA
ENSG00000116698	SMG7	5330.83	0.0676981	0.0594121	0.521317	4945.52	0.3079	0.0481077	1.58836e-09	8537.63	0.321118	0.165683	0.107034	7069.17	-0.172945	0.179466	0.449384	Gran-specific TNF	NA
ENSG00000116701	NCF2	66.8626	-0.21773	0.253279	0.64995	4171.02	0.0104215	0.0510555	0.910297	5261.84	4.88496	0.144807	1.04789e-246	5324.75	4.91901	0.195642	2.89257e-137	NA	Conserved diff
ENSG00000162704	ARPC5	4867.68	0.0979141	0.0598627	0.300316	12048.5	0.0671836	0.039747	0.196259	20723.9	1.29181	0.192867	1.71484e-10	21090.1	1.35004	0.217433	3.03235e-09	NA	Conserved diff
ENSG00000143344	RGL1	26.909	0.879925	0.389847	0.111326	185.999	2.76586	0.176152	7.50289e-54	160.658	1.44495	0.209774	4.80077e-11	182.222	1.71056	0.219108	4.66929e-14	Gran-specific TNF	Conserved diff
ENSG00000198756	COLGALT2	596.86	0.104416	0.0933081	0.530868	74.6946	-0.836244	0.234747	0.00163297	1674.21	-1.95886	0.204842	1.85885e-20	1962.94	-1.01894	0.17565	3.42839e-08	Gran-specific TNF	Conserved diff
ENSG00000198860	TSEN15	1705.75	0.0763783	0.066036	0.513274	677.336	-0.25609	0.0848223	0.00936501	3279.56	-0.72227	0.177841	0.000195025	3171.32	-0.807646	0.183093	3.82797e-05	Gran-specific TNF	Conserved diff
ENSG00000116667	C1orf21	291.491	0.0665051	0.138851	0.811792	251.637	-0.19323	0.125297	0.24684	523.951	-0.601564	0.147655	0.000185463	500.245	-0.730881	0.170858	6.77652e-05	NA	Conserved diff
ENSG00000116406	EDEM3	5404.16	0.0862278	0.0578389	0.360633	4130.44	-0.211257	0.0519936	0.000251968	7124.75	0.0920719	0.167748	0.706841	7862.21	0.389896	0.173165	0.0488977	Gran-specific TNF	TPA-specific
ENSG00000135842	FAM129A	5031.36	0.539479	0.0659579	1.36155e-14	8167.69	1.91033	0.0446769	0	7604.3	0.189759	0.164643	0.379609	9246.29	0.710655	0.180978	0.000281227	Conserved TNF	TPA-specific
ENSG00000121481	RNF2	1505.86	0.155279	0.0737641	0.147051	1373.43	0.0444519	0.0621413	0.647063	2160.24	0.398266	0.132728	0.00783615	2183.6	0.455745	0.163141	0.0122806	NA	Conserved diff
ENSG00000121486	TRMT1L	1354.57	-0.0874258	0.0706331	0.47651	1342.3	-0.757323	0.069215	1.90353e-26	2140.21	0.191903	0.140251	0.283331	1871.48	-0.157937	0.172501	0.474421	Gran-specific TNF	NA
ENSG00000116668	SWT1	148.401	0.546735	0.175617	0.0150132	185.107	0.286799	0.149075	0.130291	324.932	0.311847	0.141836	0.0620886	429.683	1.00051	0.153921	4.86859e-10	Pro-specific TNF	TPA-specific
ENSG00000279838	AL356273.3	177.559	0.194131	0.16659	0.508875	193.116	-0.333379	0.144234	0.0583512	51.5326	1.2784	0.275801	1.68954e-05	34.2573	0.407477	0.364597	0.371419	NA	ATRA-specific
ENSG00000116679	IVNS1ABP	4652.22	-0.0284747	0.0549736	0.79696	3860.06	-0.193595	0.0517542	0.000864302	10869.1	1.12664	0.115748	3.66436e-21	7098.35	0.143466	0.121712	0.342652	Gran-specific TNF	ATRA-specific
ENSG00000047410	TPR	11257	0.213019	0.0635641	0.00758591	7360.69	-0.0709821	0.0461645	0.248635	16154.1	0.0458977	0.181626	0.873628	13896.8	-0.373859	0.180926	0.073747	Pro-specific TNF	NA
ENSG00000157181	C1orf27	1040.18	0.299295	0.0784426	0.00162959	947.306	-0.132507	0.0709218	0.144167	1355.27	-0.0510637	0.0982349	0.723649	1401.03	0.0804723	0.121548	0.616734	Pro-specific TNF	NA
ENSG00000116711	PLA2G4A	1030.42	0.171164	0.0837151	0.162916	444.576	-1.12399	0.102486	1.44041e-26	754.16	-0.480284	0.130434	0.00082319	516.693	-2.38946	0.166783	4.19511e-45	Gran-specific TNF	Conserved diff
ENSG00000150681	RGS18	1201.68	0.0208583	0.0844391	0.908052	1061.32	-1.61092	0.0828799	3.04094e-82	3180.51	-0.058623	0.128552	0.761306	3835.63	0.477731	0.153272	0.00473153	Gran-specific TNF	TPA-specific
ENSG00000090104	RGS1	119.804	1.70022	0.212097	5.05562e-14	2082.95	2.62398	0.0648215	0	564.472	3.17693	0.195051	6.85225e-58	5318.01	6.56652	0.201743	1.27248e-229	Conserved TNF	Conserved diff
ENSG00000231767	AL136454.1	32.7918	-0.00793103	0.343267	0.992601	25.6617	0.0504009	0.375991	0.942167	104.256	-0.680446	0.469913	0.25207	88.1015	-1.38414	0.479672	0.00944856	NA	TPA-specific
ENSG00000116741	RGS2	85.8815	-0.269503	0.226475	0.498009	944.616	-0.00414019	0.0770721	0.975941	1466.24	3.29293	0.250563	6.42358e-38	5104.92	5.21016	0.260602	4.82954e-87	NA	Conserved diff
ENSG00000116750	UCHL5	4936.67	0.0696824	0.0551356	0.463	1873.36	-0.111463	0.0611245	0.156284	4925.46	-0.94969	0.146769	7.55783e-10	5553.36	-0.450952	0.178729	0.0253799	NA	Conserved diff
ENSG00000023572	GLRX2	512.94	-0.207398	0.104569	0.179548	243.433	-0.358959	0.130607	0.0200149	723.695	-1.2217	0.232882	8.71838e-07	959.939	-0.126336	0.254697	0.714388	Gran-specific TNF	ATRA-specific
ENSG00000134371	CDC73	2373.2	0.254232	0.0636044	0.000836893	2391.21	-0.0350186	0.060228	0.718555	3022.14	0.608488	0.13261	2.09072e-05	3367.95	0.886691	0.159391	1.30449e-07	Pro-specific TNF	Conserved diff
ENSG00000066279	ASPM	9948.25	0.144671	0.0601105	0.0832581	5904.03	-0.313651	0.0458755	9.12919e-11	7356.69	0.0817475	0.229134	0.815272	3936.64	-3.10152	0.231051	1.03141e-39	Gran-specific TNF	TPA-specific
ENSG00000235748	SEPT14P12	53.2313	0.312656	0.298358	0.564505	33.0755	-0.452121	0.366309	0.377896	5.00974	-0.081882	0.681458	0.940357	2.66676	-3.97998	1.29008	0.00521875	NA	TPA-specific
ENSG00000177888	ZBTB41	925.552	-0.0157641	0.0856659	0.933022	1444.39	-0.091922	0.0800252	0.41915	1479.03	0.375781	0.148347	0.0281968	1277.65	0.0159878	0.159259	0.945203	NA	ATRA-specific
ENSG00000213047	DENND1B	1003.99	-0.113565	0.103802	0.541711	2200.63	0.143036	0.0571413	0.0372684	1994.34	0.529956	0.163626	0.00374606	3713.3	1.85225	0.173757	2.22226e-25	Gran-specific TNF	Conserved diff
ENSG00000151414	NEK7	1761.75	0.139791	0.0782501	0.244471	2328.3	-0.628571	0.0650833	9.41834e-21	4371.48	1.11687	0.126779	1.71642e-17	3790.74	0.833544	0.155789	4.11225e-07	Gran-specific TNF	Conserved diff
ENSG00000081237	PTPRC	5199.49	0.321576	0.0661628	2.18757e-05	26020.9	-0.00276532	0.0379093	0.96802	35897.5	2.36899	0.134018	4.52826e-68	36491.4	2.41886	0.156214	1.53105e-52	Pro-specific TNF	Conserved diff
ENSG00000229989	MIR181A1HG	2961.17	0.714425	0.0746954	7.17571e-20	2719.17	0.614154	0.0646877	4.47995e-20	28.6747	-0.597436	0.333853	0.142011	33.7033	-0.0203455	0.371628	0.970691	Conserved TNF	NA
ENSG00000207975	MIR181B1	165.666	0.759991	0.17853	0.000304833	94.8503	0.363507	0.215687	0.197847	17.5525	-1.62055	0.41358	0.000340609	22.023	-0.532566	0.415238	0.297477	Pro-specific TNF	ATRA-specific
ENSG00000233410	LINC01222	799.609	0.589963	0.0953439	1.72659e-08	625.247	-0.0569835	0.089714	0.688903	168.167	-0.799891	0.206714	0.000410504	121.471	-2.68389	0.320199	4.67524e-16	Pro-specific TNF	Conserved diff
ENSG00000235492	LINC01221	28.8968	1.02366	0.374286	0.0404425	6.6529	-0.858195	0.751368	0.422187	33.9026	-1.93444	0.292152	2.8378e-10	27.478	-4.82876	0.613949	2.97255e-14	Pro-specific TNF	Conserved diff
ENSG00000162702	ZNF281	2037.95	0.137059	0.0647284	0.144068	1811.13	0.374496	0.0566767	4.18665e-10	2799.63	0.0548713	0.156594	0.818984	2449.07	-0.309741	0.169508	0.119727	Gran-specific TNF	NA
ENSG00000118193	KIF14	5733.09	0.274181	0.0630289	0.000208033	3138.75	0.0411319	0.0631814	0.681208	4969.25	-0.100315	0.210215	0.7485	2838.98	-3.07025	0.21052	1.04898e-46	Pro-specific TNF	TPA-specific
ENSG00000118197	DDX59	392.498	0.192652	0.117738	0.300102	704.193	0.0768105	0.0820745	0.527643	843.559	0.822669	0.117878	2.57878e-11	803.865	0.73883	0.154451	7.0229e-06	NA	Conserved diff
ENSG00000118200	CAMSAP2	162.613	0.342513	0.172323	0.178238	238.736	0.00162123	0.135681	0.994597	122.043	0.707093	0.197426	0.00118445	870.893	4.17131	0.147479	1.59322e-173	NA	Conserved diff
ENSG00000163362	INAVA	457.025	0.388225	0.101609	0.00159911	347.257	0.507735	0.112131	3.57156e-05	1000.66	0.683316	0.146384	1.45532e-05	617.772	-0.670105	0.159978	9.83078e-05	Conserved TNF	Opposite diff
ENSG00000116852	KIF21B	3011.17	0.172405	0.0727893	0.0902121	4273.23	-0.0286576	0.0540004	0.746699	7577.86	0.34147	0.177124	0.109262	12463.2	1.47446	0.197094	5.53102e-13	NA	TPA-specific
ENSG00000116857	TMEM9	193.779	-0.0796129	0.154847	0.798608	208.135	-0.569909	0.144604	0.000407162	745.202	0.0627843	0.214561	0.851159	556.668	-0.87946	0.242806	0.000876685	Gran-specific TNF	TPA-specific
ENSG00000159176	CSRP1	1449.29	-0.140067	0.0720203	0.190919	3625.82	-0.0800297	0.0498856	0.224887	4832.34	1.07195	0.13458	1.84577e-14	5690.69	1.43112	0.183033	4.26248e-14	NA	Conserved diff
ENSG00000134375	TIMM17A	2709.05	0.161598	0.0654411	0.0731238	1373.43	0.176152	0.0748059	0.05277	4412.95	-0.715327	0.22352	0.00423813	4782.43	-0.389998	0.239562	0.171695	NA	ATRA-specific
ENSG00000176393	RNPEP	3282.1	-0.190201	0.0643874	0.0232787	3583.2	-0.0329803	0.0567884	0.718922	9651.16	0.248053	0.150729	0.182992	8360.65	-0.124497	0.188154	0.616949	Pro-specific TNF	NA
ENSG00000143862	ARL8A	513.75	0.0600594	0.101444	0.76692	2448.69	0.165684	0.0752753	0.0745924	3309.73	1.63298	0.147887	5.41686e-27	3632.63	1.82963	0.196553	1.41085e-19	NA	Conserved diff
ENSG00000143851	PTPN7	8470.53	-0.0858841	0.0559407	0.342771	13979.3	0.179268	0.0424617	0.000132349	28987.5	0.845686	0.0839851	1.38599e-22	30100.1	0.957267	0.114318	5.00497e-16	Gran-specific TNF	Conserved diff
ENSG00000243323	PTPRVP	24.315	0.252056	0.43086	0.768676	98.7385	-0.591107	0.206747	0.0147926	193.175	2.20161	0.237643	2.94671e-19	79.8623	0.438772	0.285568	0.200233	Gran-specific TNF	ATRA-specific
ENSG00000077152	UBE2T	986.353	0.0402615	0.0881557	0.822509	753.94	-0.236985	0.0892403	0.0255448	2264.05	-0.354842	0.223841	0.20253	1591.26	-1.9101	0.255435	5.65988e-13	Gran-specific TNF	TPA-specific
ENSG00000077157	PPP1R12B	2325.83	0.0286064	0.0649552	0.828505	6402.44	-0.625744	0.0432391	7.93428e-46	4632.81	1.41909	0.231504	6.24833e-09	2717.69	0.245242	0.234683	0.407382	Gran-specific TNF	ATRA-specific
ENSG00000232626	AC099336.1	44.0937	-0.399018	0.302949	0.437638	56.5987	-0.787605	0.263633	0.0102539	10.9908	0.286265	0.454408	0.661867	6.53117	-1.61109	0.664835	0.0325232	Gran-specific TNF	TPA-specific
ENSG00000236439	AC099336.2	43.4448	-0.311962	0.356697	0.643584	61.1592	0.700455	0.284376	0.0410686	194.54	0.183595	0.376683	0.742344	169.184	-0.193748	0.388547	0.712725	Gran-specific TNF	NA
ENSG00000117139	KDM5B	3412.39	-0.433397	0.0616176	7.22376e-11	4706.79	0.500176	0.0482273	7.96078e-24	9448.56	0.126676	0.148107	0.534247	11067.2	0.567475	0.157614	0.000946964	Opposite TNF	TPA-specific
ENSG00000235449	AC098934.3	23.8205	0.405303	0.446919	0.629987	44.4674	0.786875	0.323079	0.0438032	16.4647	0.312223	0.428327	0.604397	15.1657	0.147828	0.550682	0.850634	Gran-specific TNF	NA
ENSG00000183155	RABIF	486.906	0.0274297	0.104436	0.901714	663.551	0.0269397	0.0859668	0.856467	1276.92	0.543613	0.122469	4.03685e-05	1115.78	0.229728	0.159195	0.233024	NA	ATRA-specific
ENSG00000117153	KLHL12	1158.74	0.00508118	0.0796626	0.978551	1394.34	-0.172045	0.0654666	0.0274067	3377.96	0.156491	0.1131	0.277126	3233.68	0.0689764	0.150449	0.736901	Gran-specific TNF	NA
ENSG00000159346	ADIPOR1	2230.3	-0.0120843	0.0756092	0.942404	2490.94	-0.14624	0.0587137	0.0384271	6560.05	0.657643	0.112967	3.81489e-08	8232.44	1.18588	0.165252	5.04795e-12	Gran-specific TNF	Conserved diff
ENSG00000159348	CYB5R1	454.711	-0.0590229	0.109151	0.788284	827.655	-0.207134	0.0819605	0.0351458	2449.66	1.01017	0.196647	1.52246e-06	3948.91	1.9686	0.222145	7.77357e-18	Gran-specific TNF	Conserved diff
ENSG00000143847	PPFIA4	53.4547	-0.919009	0.285577	0.0112312	1459	-1.0907	0.0634368	1.81035e-64	4105.76	5.27441	0.143211	5.70061e-294	332.639	1.17889	0.215586	2.18337e-07	Conserved TNF	Conserved diff
ENSG00000133048	CHI3L1	98.0919	0.18564	0.205199	0.630769	92.8312	1.59755	0.21693	2.28176e-12	1279.21	0.687216	0.143335	8.08902e-06	31706.6	6.01196	0.150368	0	Gran-specific TNF	Conserved diff
ENSG00000159388	BTG2	574.114	2.28691	0.110646	2.8157e-92	18761.8	2.67868	0.0567037	0	5073.5	3.57972	0.1589	3.12941e-110	20241.2	5.68069	0.191052	1.0324e-191	Conserved TNF	Conserved diff
ENSG00000058668	ATP2B4	6110.8	-0.324351	0.0606437	1.98094e-06	19370.4	-0.449602	0.0531844	4.68844e-16	27165.2	1.96661	0.21099	1.75042e-19	10627.9	-0.0793333	0.213172	0.788332	Conserved TNF	ATRA-specific
ENSG00000122188	LAX1	84.8652	0.311295	0.241012	0.44863	13.3288	0.339488	0.587297	0.720248	127.142	-2.99385	0.267388	9.95725e-28	1148.57	3.21277	0.198436	2.29541e-57	NA	Opposite diff
ENSG00000058673	ZC3H11A	69.4341	0.426045	0.245948	0.263375	68.7129	0.0694067	0.234658	0.865784	26.6158	0.660949	0.356737	0.126247	30.4351	0.989019	0.343172	0.00954313	NA	TPA-specific
ENSG00000257315	ZBED6	176.018	0.263644	0.167291	0.325219	219.927	0.186088	0.134835	0.31236	115.939	1.18981	0.481327	0.0327965	106.099	1.0359	0.480748	0.0608027	NA	ATRA-specific
ENSG00000182004	SNRPE	4663.78	0.0511161	0.0637156	0.674222	1838.46	0.236849	0.0729337	0.00465336	7844.71	-1.18181	0.293219	0.000219792	7175.67	-1.59228	0.306549	9.26679e-07	Gran-specific TNF	Conserved diff
ENSG00000143850	PLEKHA6	1507	-0.109827	0.0738551	0.36251	2267.44	-0.0799166	0.0641358	0.372007	4563.27	0.680561	0.129075	7.60321e-07	5171.96	0.991935	0.15389	6.88489e-10	NA	Conserved diff
ENSG00000158615	PPP1R15B	5151.7	0.255268	0.0582112	0.00018049	5753.51	0.324748	0.0451799	8.09382e-12	10053.7	0.0878661	0.134014	0.647019	10347.4	0.20201	0.155494	0.29042	Conserved TNF	NA
ENSG00000133056	PIK3C2B	831.059	-0.567637	0.0869604	2.123e-09	965.871	-0.0664918	0.0794566	0.580936	2364.39	-0.205928	0.171295	0.355684	9365.72	2.69891	0.182216	3.79025e-48	Pro-specific TNF	TPA-specific
ENSG00000117222	RBBP5	1782.51	0.117102	0.0658072	0.246838	1343.17	-0.0601117	0.0675079	0.552199	2281.63	0.146315	0.143733	0.447214	2804.31	0.698384	0.15599	2.86695e-05	NA	TPA-specific
ENSG00000133059	DSTYK	659.493	0.164473	0.093543	0.254231	617.785	0.311071	0.0863657	0.00142291	1473.77	0.568277	0.176226	0.00391825	2142.56	1.40997	0.185329	2.14068e-13	Gran-specific TNF	Conserved diff
ENSG00000133069	TMCC2	130.25	1.90584	0.191256	1.52014e-21	142.875	4.6963	0.281988	1.61525e-60	173.291	-1.26074	0.19546	8.60524e-10	873.793	2.64153	0.203105	2.46511e-37	Conserved TNF	Opposite diff
ENSG00000235363	SNRPGP10	159.688	-0.390443	0.518306	0.696305	71.2142	0.597632	0.252247	0.0511191	298.246	-0.878174	0.282542	0.00564783	276.141	-1.17026	0.297208	0.000269497	NA	Conserved diff
ENSG00000158715	SLC45A3	112.151	-0.478164	0.209386	0.106152	10.8517	-0.307937	0.648372	0.776366	556.586	-3.37416	0.185921	1.0193e-71	17079.6	5.04769	0.162746	1.4126e-208	NA	Opposite diff
ENSG00000069275	NUCKS1	14051.8	0.0495454	0.0616242	0.673334	9325.49	-0.169202	0.0425949	0.000360297	23367.6	-0.0610828	0.130469	0.754026	20124.1	-0.499347	0.152334	0.00284998	Gran-specific TNF	TPA-specific
ENSG00000117280	RAB29	768.477	-0.0577096	0.0900699	0.747309	796.048	0.139924	0.0759863	0.151323	2521.67	0.196084	0.118746	0.181336	6008.17	2.06161	0.143667	3.01412e-45	NA	TPA-specific
ENSG00000276600	RAB7B	1860.13	-0.232738	0.0830595	0.0343001	966.783	3.45253	0.0960697	2.54238e-280	5251.15	-3.61229	0.154352	6.19355e-119	7348.42	-0.909469	0.152062	1.20093e-08	Opposite TNF	Conserved diff
ENSG00000263961	C1orf186	1199.94	-0.248633	0.0765087	0.0102962	6.92441	2.24209	0.799172	0.0171574	7234.69	-3.70944	0.204447	1.10549e-71	16255.9	0.533346	0.181001	0.00790827	Opposite TNF	Opposite diff
ENSG00000196550	FAM72A	1319.96	0.000792012	0.0735675	0.996076	427.882	-0.26336	0.103082	0.0328775	1494.8	-1.34184	0.201898	2.40862e-10	1175.96	-3.18964	0.206552	2.91234e-52	Gran-specific TNF	Conserved diff
ENSG00000266028	SRGAP2	2394.45	-0.0386089	0.0662764	0.769315	2900.42	0.486553	0.0549844	1.57821e-17	4498.57	0.19373	0.156902	0.340308	5770.15	0.836731	0.163549	1.37705e-06	Gran-specific TNF	TPA-specific
ENSG00000263528	IKBKE	2961.19	1.14132	0.0623099	1.70285e-72	6281.95	1.83258	0.0446755	0	4773.76	0.978613	0.0867854	4.09475e-28	4908.6	1.06536	0.154476	3.52765e-11	Conserved TNF	Conserved diff
ENSG00000261000	AC244034.2	51.0569	1.18047	0.328579	0.00350163	159.237	1.64834	0.168422	2.69862e-21	27.5201	0.900296	0.295549	0.00682809	33.0208	1.32326	0.337744	0.00029109	Conserved TNF	Conserved diff
ENSG00000266094	RASSF5	1703.03	-0.0904126	0.0739072	0.483408	5181.54	0.516862	0.062812	2.98189e-15	9147.93	1.21639	0.0954148	9.98191e-36	15808.4	2.26771	0.156328	3.21036e-46	Gran-specific TNF	Conserved diff
ENSG00000143486	EIF2D	1839.25	0.0584647	0.0735942	0.676924	1009.46	-0.138417	0.0782801	0.172028	5711.65	-0.443775	0.136598	0.00362899	4713.88	-1.15467	0.157207	1.49685e-12	NA	Conserved diff
ENSG00000143479	DYRK3	406.432	0.0404826	0.115861	0.866214	174.434	0.319008	0.154733	0.0992763	756.005	-0.537975	0.147364	0.000924466	661.546	-1.0101	0.172199	2.35515e-08	NA	Conserved diff
ENSG00000162889	MAPKAPK2	3131.56	0.0605594	0.0684307	0.639728	7594.3	0.00960624	0.0477829	0.911751	21799.6	1.74945	0.137233	1.00169e-35	13574.8	0.806294	0.18735	6.0728e-05	NA	Conserved diff
ENSG00000180667	YOD1	1981.72	0.210477	0.0680462	0.0158469	1740.45	-0.317072	0.0592115	6.54148e-07	3374.95	0.255234	0.140172	0.134081	3342.98	0.264348	0.149858	0.134752	Opposite TNF	NA
ENSG00000196352	CD55	953.386	0.0743997	0.0842084	0.640109	1036.64	-0.421037	0.0721102	4.67144e-08	5584.08	1.49903	0.173492	7.37544e-17	10318.5	2.62127	0.201851	3.1634e-37	Gran-specific TNF	Conserved diff
ENSG00000203710	CR1	135.541	-0.33722	0.177049	0.20319	10741.3	-0.421011	0.058876	1.04907e-11	19132	7.57145	0.17725	0	10506.3	6.7202	0.181588	9.76932e-297	Gran-specific TNF	Conserved diff
ENSG00000117335	CD46	5260.35	0.0699831	0.0637883	0.540752	7435.11	-0.0623751	0.0452348	0.312831	22664.9	1.35216	0.105174	2.53228e-36	18067.6	0.901795	0.122503	1.33155e-12	NA	Conserved diff
ENSG00000234219	CDCA4P4	47.7793	0.132883	0.303004	0.829074	53.2518	0.33318	0.265094	0.366876	2.23414	-0.541042	0.981642	0.705597	10.4313	2.76607	0.624801	3.57393e-05	NA	TPA-specific
ENSG00000203709	C1orf132	1699.97	-0.232721	0.069156	0.00726682	1432.13	0.550849	0.0703581	7.05226e-14	351.062	-0.740243	0.227688	0.00360199	615.101	0.879887	0.334553	0.0192268	Opposite TNF	Opposite diff
ENSG00000196878	LAMB3	110.771	1.37579	0.221869	1.59125e-08	2888.44	2.66969	0.0604704	0	2977.75	5.67871	0.323893	5.60075e-67	415.279	2.6725	0.24228	4.10694e-27	Conserved TNF	Conserved diff
ENSG00000009790	TRAF3IP3	352.65	-0.486617	0.117786	0.000500463	2948.37	-0.273454	0.0530573	1.83535e-06	4426.58	1.82817	0.13727	6.46007e-39	2668.9	0.829119	0.147295	9.04756e-08	Conserved TNF	Conserved diff
ENSG00000162757	C1orf74	413.814	-0.159236	0.116103	0.412519	247.74	-0.0582738	0.124862	0.779931	538.288	-0.402702	0.112673	0.00121445	477.573	-0.791206	0.136336	3.38133e-08	NA	Conserved diff
ENSG00000117597	DIEXF	1608.48	0.0175184	0.067619	0.903256	872.625	0.0440631	0.0838581	0.749221	2107.11	-0.495728	0.149597	0.00294187	2353.27	-0.0989729	0.171853	0.666991	NA	ATRA-specific
ENSG00000117625	RCOR3	2004.42	0.0517107	0.0859943	0.763699	1682.62	-0.0983552	0.0614617	0.226181	2753.47	0.0368276	0.123296	0.847948	3084.88	0.378047	0.132071	0.0100837	NA	TPA-specific
ENSG00000170385	SLC30A1	1401.78	-0.0518672	0.0743703	0.721766	2464.97	0.208556	0.0589498	0.00177636	3401.67	1.03709	0.121484	1.77912e-16	4265.74	1.52423	0.15006	3.9195e-23	Gran-specific TNF	Conserved diff
ENSG00000117650	NEK2	1098.35	-0.0858981	0.0755345	0.522512	563.971	-0.657922	0.0898745	3.13967e-12	1784.42	-0.700228	0.190693	0.000854791	1185.06	-3.55386	0.217521	2.09591e-58	Gran-specific TNF	Conserved diff
ENSG00000123684	LPGAT1	4496.36	0.109595	0.0571069	0.198745	4860.61	0.380998	0.0455397	9.70881e-16	7377.04	0.497425	0.129954	0.000480853	7605.75	0.602778	0.148892	0.000174498	Gran-specific TNF	Conserved diff
ENSG00000143493	INTS7	2638.98	0.0216976	0.0636338	0.869605	1936.92	-0.215752	0.0564286	0.00063504	3736.36	-0.478035	0.124654	0.000468221	3098.05	-1.17653	0.141032	6.50042e-16	Gran-specific TNF	Conserved diff
ENSG00000143476	DTL	4227.95	-0.00215944	0.0557879	0.987446	1149.53	-0.13701	0.0682342	0.110536	4298.7	-0.898601	0.151069	1.83293e-08	3022.06	-3.41553	0.180961	1.17732e-77	NA	Conserved diff
ENSG00000220749	RPL21P28	419.716	-0.0303389	0.110075	0.897283	265.681	0.0379146	0.139496	0.877324	181.175	-0.797721	0.398505	0.0942915	145.449	-1.85915	0.418683	3.36943e-05	NA	TPA-specific
ENSG00000229983	AL606468.1	21.7544	-0.53503	0.493411	0.546565	9.26713	-0.688177	0.62263	0.440781	11.7715	-1.10456	0.463845	0.0408425	8.61565	-3.56198	0.795426	2.85481e-05	NA	Conserved diff
ENSG00000066027	PPP2R5A	1585.28	-0.0223106	0.0686406	0.876692	1790.24	-0.133304	0.060464	0.0740155	4131.28	0.215714	0.134643	0.196882	5276.87	0.842973	0.174358	5.50207e-06	NA	TPA-specific
ENSG00000065600	TMEM206	825.138	-0.0733727	0.0879247	0.660257	745.636	-0.302994	0.0791204	0.000621371	1599.16	-0.300485	0.168515	0.143705	1581.83	-0.298933	0.211503	0.244069	Gran-specific TNF	NA
ENSG00000117691	NENF	546.248	-0.0542471	0.123889	0.829474	388.343	0.200434	0.107987	0.147408	2011.62	-0.638554	0.294927	0.0668761	1465.4	-2.26081	0.32523	2.42111e-11	NA	TPA-specific
ENSG00000162772	ATF3	94.7287	0.438506	0.226849	0.194348	60.7582	2.14515	0.277014	1.35595e-13	318.949	-0.955738	0.328884	0.0103186	1558.49	2.70081	0.181274	1.04549e-48	Gran-specific TNF	Opposite diff
ENSG00000123685	BATF3	240.868	0.345575	0.155593	0.119449	32.346	1.95034	0.36958	9.77898e-07	544.3	-2.86417	0.311184	5.11205e-19	640.238	-1.50474	0.293773	1.33539e-06	Gran-specific TNF	Conserved diff
ENSG00000117697	NSL1	955.527	0.0390592	0.0774419	0.801743	925.486	-0.39104	0.0739259	9.16593e-07	2422.01	0.00794917	0.196486	0.980647	2002.06	-0.563668	0.216009	0.0202911	Gran-specific TNF	TPA-specific
ENSG00000203705	TATDN3	546.109	0.196289	0.100013	0.185162	549.816	-0.259789	0.0901523	0.0139096	1615.38	0.1163	0.185899	0.664868	1337.15	-0.425372	0.200603	0.0655568	Gran-specific TNF	NA
ENSG00000198468	FLVCR1-AS1	22.1466	0.441053	0.430323	0.575129	22.6737	0.0625703	0.422009	0.9366	30.807	-0.259202	0.329149	0.571605	24.8317	-1.03245	0.416458	0.028329	NA	TPA-specific
ENSG00000162769	FLVCR1	1483.02	0.272307	0.0686252	0.000935278	692.138	0.668105	0.0840144	2.70748e-14	1678.83	-0.317366	0.134242	0.0425656	1422.14	-0.871445	0.120957	4.12833e-12	Conserved TNF	Conserved diff
ENSG00000174606	ANGEL2	1730.13	0.0405432	0.0673636	0.763592	1807.98	-0.238821	0.0596537	0.000319004	2538.72	0.230189	0.134925	0.16487	2267.35	-0.0493997	0.145542	0.807442	Gran-specific TNF	NA
ENSG00000136643	RPS6KC1	998.76	0.127994	0.0763254	0.283872	731.525	0.116486	0.0785212	0.269598	1324.9	-0.501897	0.136251	0.00081919	1935.25	0.60704	0.136178	3.12557e-05	NA	Opposite diff
ENSG00000143499	SMYD2	1010.14	-0.128102	0.0857056	0.358979	369.674	-0.117011	0.110524	0.465036	1469.15	-1.25189	0.131987	3.8254e-20	1560.71	-0.925557	0.149227	3.15685e-09	NA	Conserved diff
ENSG00000152104	PTPN14	34.1963	-0.260492	0.382874	0.729514	9.57313	-0.975816	0.643273	0.256689	34.4192	-1.5721	0.417308	0.000601749	61.9716	0.519774	0.310831	0.158784	NA	ATRA-specific
ENSG00000117724	CENPF	13951	0.0440881	0.0574547	0.690132	5728.71	-0.531253	0.0434325	6.75535e-33	11147	-0.45848	0.197766	0.0473598	7084.42	-3.14775	0.186852	4.8966e-62	Gran-specific TNF	Conserved diff
ENSG00000136636	KCTD3	1475.61	0.0416726	0.0760609	0.785409	703.018	-0.182107	0.0935888	0.124953	1811.38	-0.472133	0.107211	4.69766e-05	1343.06	-1.77718	0.127448	8.88167e-43	NA	Conserved diff
ENSG00000067533	RRP15	1783.76	0.0646327	0.0688034	0.615309	706.551	0.0611417	0.0928337	0.677255	1673.8	-0.858576	0.167819	1.69048e-06	1713.16	-0.721685	0.18981	0.000452291	NA	Conserved diff
ENSG00000092969	TGFB2	25.3956	-0.619311	0.392424	0.324442	5.30215	0.073041	0.827586	0.961654	26.1417	-3.00038	0.415579	4.84032e-12	25.4221	-3.19401	0.468744	6.16587e-11	NA	Conserved diff
ENSG00000143353	LYPLAL1	651.898	0.0937679	0.0973979	0.603721	591.687	-0.295569	0.0943106	0.00661255	1080.62	-0.35641	0.228741	0.211874	1702.56	0.877751	0.243316	0.000923463	Gran-specific TNF	TPA-specific
ENSG00000136628	EPRS	16007.2	0.0867365	0.0527242	0.296693	5265.63	-0.128901	0.0441241	0.0124241	20542.5	-0.487096	0.142617	0.00210122	21778.9	-0.252659	0.1628	0.195248	Gran-specific TNF	ATRA-specific
ENSG00000162813	BPNT1	988.329	0.00814307	0.0862184	0.967528	576.618	-0.362234	0.0861079	0.000140988	2696.76	-0.285542	0.178653	0.198198	2931.62	0.00245415	0.200932	0.993076	Gran-specific TNF	NA
ENSG00000067704	IARS2	4782.64	-0.0309505	0.0572472	0.788284	1857.84	-0.408034	0.056257	5.08638e-12	7603.74	-0.654981	0.158836	0.000151582	7294.89	-0.768197	0.186377	0.000129709	Gran-specific TNF	Conserved diff
ENSG00000218283	MORF4L1P1	362.283	-0.161424	0.119425	0.421677	257.433	0.107196	0.125539	0.571998	789.019	0.234701	0.137328	0.164042	844.279	0.439904	0.178506	0.029391	NA	TPA-specific
ENSG00000213033	AURKAPS1	22.4938	0.164174	0.438497	0.855088	27.4641	0.270976	0.378329	0.646711	11.8342	-0.658584	0.438177	0.231362	8.43225	-2.5477	0.683424	0.000596712	NA	TPA-specific
ENSG00000117791	2002-03-01	154.855	-0.290325	0.166579	0.259802	20.0981	-0.274621	0.438815	0.693779	376.458	-2.10121	0.185022	1.65699e-28	348.302	-2.70143	0.219071	1.18983e-33	NA	Conserved diff
ENSG00000136630	HLX	474.41	-0.100514	0.105738	0.609654	3339.58	0.116174	0.0561182	0.0977094	3511.73	1.92655	0.185237	4.79043e-24	2514.72	1.30861	0.217544	9.77531e-09	NA	Conserved diff
ENSG00000143507	DUSP10	428.527	0.613695	0.108528	3.80827e-07	561.237	1.14962	0.0912132	6.96108e-35	703.286	-0.536144	0.133151	0.000223048	1225.04	0.983872	0.179904	2.17709e-07	Conserved TNF	Opposite diff
ENSG00000143498	TAF1A	491.827	0.125624	0.111474	0.527412	250.349	0.235569	0.128044	0.151711	511.564	-0.757264	0.159527	1.01034e-05	480.369	-0.964677	0.170781	8.11032e-08	NA	Conserved diff
ENSG00000154305	MIA3	3666.87	-0.039996	0.0599871	0.736676	1883.03	-0.518008	0.0630602	3.33975e-15	4865.43	-0.309304	0.1545	0.0942651	4898.25	-0.246722	0.157375	0.190244	Gran-specific TNF	NA
ENSG00000186063	AIDA	2111.79	-0.0144885	0.0661653	0.919995	1139.73	0.395699	0.0694861	1.0574e-07	2338.55	-0.504136	0.159483	0.00479123	2607.77	-0.112056	0.167315	0.612448	Gran-specific TNF	ATRA-specific
ENSG00000162819	BROX	2418.7	0.0250483	0.0649644	0.850062	2710.36	-0.282711	0.0576865	6.35426e-06	3207.59	0.727823	0.112274	6.99396e-10	3025.38	0.618718	0.14203	4.84516e-05	Gran-specific TNF	Conserved diff
ENSG00000228106	AL392172.1	43.47	0.119252	0.306437	0.848234	25.9877	0.106995	0.382888	0.872944	45.3656	-0.722119	0.405645	0.144474	41.547	-1.05207	0.434594	0.0327132	NA	TPA-specific
ENSG00000162909	CAPN2	2093.66	0.0823627	0.0635676	0.447034	187.71	1.63329	0.157363	7.35102e-24	1791.76	-2.01741	0.163592	1.77641e-33	4547.11	1.1402	0.141847	7.63617e-15	Gran-specific TNF	Opposite diff
ENSG00000143514	TP53BP2	3621.67	0.457869	0.0653548	8.74419e-11	2864.67	0.520112	0.0508739	3.56747e-23	5739.39	0.152229	0.132093	0.37965	6066.69	0.333643	0.156221	0.0633849	Conserved TNF	NA
ENSG00000272645	GTF2IP20	415.28	0.115194	0.112605	0.57605	365.842	-0.182236	0.109276	0.203538	836.909	-0.0214661	0.234455	0.955242	601.617	-1.15815	0.282658	0.000143251	NA	TPA-specific
ENSG00000185495	AC138393.1	580.994	0.116562	0.116611	0.585921	510.098	-0.326511	0.0981943	0.00362409	675.312	-0.899773	0.269481	0.00270777	581.269	-1.5513	0.340492	2.01235e-05	Gran-specific TNF	Conserved diff
ENSG00000278467	AC138393.3	120.476	0.241654	0.214129	0.526365	107.935	-0.530957	0.193296	0.0200927	64.8481	-0.679543	0.785998	0.528736	55.6195	-1.26318	0.894312	0.244387	Gran-specific TNF	NA
ENSG00000143756	FBXO28	2030.45	0.170306	0.064986	0.0528112	2178.54	0.0166495	0.0553508	0.863156	3023.44	0.580384	0.111975	1.20284e-06	3811.59	1.12795	0.144428	4.57024e-14	NA	Conserved diff
ENSG00000143753	DEGS1	2742.95	0.262308	0.0640718	0.000584438	3282.38	0.568442	0.0508327	1.36569e-27	7570.23	0.656728	0.145693	2.99599e-05	7400.15	0.630819	0.188047	0.00221287	Conserved TNF	Conserved diff
ENSG00000143748	NVL	1764.88	0.0983421	0.0665071	0.365851	1157.26	0.092404	0.071725	0.352425	2261.09	-0.612143	0.134023	2.29475e-05	2369.58	-0.406413	0.146358	0.0128686	NA	Conserved diff
ENSG00000143771	CNIH4	1352.6	-0.104688	0.0740063	0.394309	1360.44	-0.291366	0.0627574	2.12943e-05	2832.48	0.404068	0.184087	0.0625994	3422.42	0.879231	0.200184	4.15516e-05	Gran-specific TNF	TPA-specific
ENSG00000162923	WDR26	3699.26	0.19885	0.0593948	0.00766674	5748.55	0.12216	0.0443078	0.019536	8344.95	0.962524	0.100813	2.14114e-20	13588.2	1.94974	0.115481	2.60169e-62	Conserved TNF	Conserved diff
ENSG00000143786	CNIH3	50.0827	-0.466186	0.284267	0.298795	28.8644	-0.527457	0.369936	0.292835	40.7278	-0.163585	0.275932	0.682544	276.419	3.5899	0.216977	7.16241e-60	NA	TPA-specific
ENSG00000185842	DNAH14	787.87	0.27832	0.0996168	0.0349728	1633.16	-0.163849	0.0644633	0.0339154	1024.19	0.918833	0.110425	1.06288e-15	472.798	-1.5096	0.15491	2.28279e-21	Opposite TNF	Opposite diff
ENSG00000143815	LBR	13473.1	-0.0392889	0.0544539	0.711058	16760.6	-0.667471	0.0520185	3.8707e-36	51837.6	1.5709	0.125595	2.04135e-34	17978	-1.34309	0.155168	4.64328e-17	Gran-specific TNF	Opposite diff
ENSG00000154380	ENAH	1093.86	0.013097	0.076315	0.93891	521.329	0.525651	0.0912717	7.34392e-08	1112.98	-0.220599	0.138178	0.19885	2330.91	1.55631	0.148511	1.46357e-24	Gran-specific TNF	TPA-specific
ENSG00000143742	SRP9	8430.88	0.105228	0.0648749	0.305794	5874.99	-0.0181262	0.0578418	0.856467	17855.8	-0.240516	0.214557	0.395154	14322.8	-1.00683	0.232972	5.62198e-05	NA	TPA-specific
ENSG00000143819	EPHX1	289.589	-0.212215	0.130497	0.303951	285.101	1.00169	0.12636	3.28558e-14	1042.69	0.553047	0.0952846	4.20857e-08	1024.37	0.539024	0.133178	0.000175143	Gran-specific TNF	Conserved diff
ENSG00000196187	TMEM63A	1143.05	-0.0920931	0.0810781	0.522918	3281.66	0.0132392	0.0532766	0.888304	5976.39	1.37508	0.183229	6.1127e-13	5385.25	1.19076	0.189648	1.97029e-09	NA	Conserved diff
ENSG00000143751	SDE2	1354.15	0.181228	0.0765812	0.0905857	1209.79	0.0151524	0.0723286	0.907584	2778.56	0.37049	0.118375	0.00528064	3275.17	0.796426	0.151737	6.9904e-07	NA	Conserved diff
ENSG00000163041	H3F3A	7148.98	-0.0135452	0.0626841	0.920696	10645.8	-0.0252328	0.0434219	0.718664	25102.8	0.744635	0.19109	0.000370174	17993.5	-0.0897711	0.224091	0.771235	NA	ATRA-specific
ENSG00000182827	ACBD3	1417.81	0.189316	0.0709205	0.0471428	1411.83	0.155602	0.0712322	0.0772379	2379.84	0.250952	0.126862	0.0990334	2512.99	0.423101	0.162125	0.0202822	Pro-specific TNF	TPA-specific
ENSG00000183814	LIN9	916.289	0.165134	0.0850583	0.19163	368.754	-0.131388	0.109756	0.395699	1015.63	-0.697975	0.15643	3.65486e-05	781.946	-1.9476	0.171196	8.82043e-29	NA	Conserved diff
ENSG00000143799	PARP1	14047.6	-0.0992686	0.0499139	0.178144	4206.61	-0.342233	0.0538384	2.0866e-09	23589.6	-1.23302	0.14028	2.03781e-17	22134	-1.49961	0.183411	2.52965e-15	Gran-specific TNF	Conserved diff
ENSG00000143772	ITPKB	1206.17	-0.429856	0.0827673	4.35097e-06	3582.62	0.14367	0.056002	0.0320036	4888.84	1.25893	0.107327	2.35387e-30	4357.14	1.04479	0.164984	1.40809e-09	Opposite TNF	Conserved diff
ENSG00000228382	ITPKB-IT1	28.1869	-0.501953	0.392513	0.455282	88.925	0.281105	0.220923	0.359645	4.9043	1.95811	0.748307	0.0227822	2.81505	0.948507	1.05929	0.485195	NA	ATRA-specific
ENSG00000163050	COQ8A	2996.34	-0.231131	0.0629305	0.00269408	616.643	-0.639272	0.0853788	9.23302e-13	5846.08	-1.24782	0.136384	8.39999e-19	6730.2	-0.609113	0.175493	0.00149581	Conserved TNF	Conserved diff
ENSG00000181450	ZNF678	90.9654	0.143761	0.222538	0.745498	92.9483	-0.174533	0.198871	0.558865	162.51	-0.180236	0.199286	0.506577	113.166	-1.59743	0.231904	3.72914e-11	NA	TPA-specific
ENSG00000143740	SNAP47	670.313	0.0367652	0.0941287	0.847504	401.913	0.00694198	0.116072	0.972998	1331.46	-0.574398	0.1625	0.00139515	1557.23	-0.0327608	0.210028	0.915409	NA	ATRA-specific
ENSG00000081692	JMJD4	977.699	-0.0292867	0.086821	0.871255	429.99	0.148375	0.100949	0.275182	359.903	-0.658513	0.209288	0.00501329	395.8	-0.2935	0.244872	0.333637	NA	ATRA-specific
ENSG00000143761	ARF1	9621.45	-0.0307266	0.0655916	0.817222	7820.26	0.109214	0.0498712	0.0763804	20619	0.0942444	0.133172	0.616596	23414.6	0.460462	0.198306	0.0415069	NA	TPA-specific
ENSG00000143793	C1orf35	745.062	-0.246143	0.12474	0.182343	427.834	0.153123	0.113081	0.323066	1745.88	-0.745114	0.24402	0.0066712	1808.94	-0.572659	0.268065	0.0633131	NA	ATRA-specific
ENSG00000162910	MRPL55	754.652	-0.111323	0.110931	0.584496	260.443	-0.333105	0.132573	0.0363847	1362.88	-1.01711	0.253006	0.000228876	1575.59	-0.422796	0.279686	0.208503	Gran-specific TNF	ATRA-specific
ENSG00000143774	GUK1	1350.18	-0.0528847	0.0877495	0.76321	1505.2	0.314121	0.0633261	4.75847e-06	3697.03	0.0995345	0.222395	0.766378	5307.23	1.00497	0.250231	0.000198184	Gran-specific TNF	TPA-specific
ENSG00000181873	IBA57	720.504	0.0280496	0.0970155	0.890931	672.77	0.22461	0.0811625	0.0190052	1081.87	0.0293558	0.143067	0.897146	918.97	-0.436269	0.160283	0.0149954	Gran-specific TNF	TPA-specific
ENSG00000154358	OBSCN	346.75	-0.25715	0.144078	0.244958	122.954	0.221624	0.183224	0.38978	840.817	-2.19348	0.199501	9.06584e-27	875.169	-1.80636	0.183987	1.13269e-21	NA	Conserved diff
ENSG00000154370	TRIM11	1415.97	-0.103166	0.0746697	0.408649	2636.36	0.16209	0.0519526	0.00690845	3112.02	0.369616	0.133224	0.0149572	2868.42	0.186151	0.166838	0.372256	Gran-specific TNF	ATRA-specific
ENSG00000168159	RNF187	1786.5	-0.338091	0.0762326	0.000145526	1327.04	-0.368768	0.0671732	3.20355e-07	6188.5	-0.950956	0.212362	3.40532e-05	8212.64	0.0514125	0.246058	0.885752	Conserved TNF	ATRA-specific
ENSG00000183929	DUSP5P1	38.8502	0.894501	0.342068	0.0534214	4.45923	0.522712	0.937559	0.731722	49.1712	-2.72012	0.349678	7.77618e-14	43.0556	-5.32061	0.604687	1.34208e-17	NA	Conserved diff
ENSG00000116574	RHOU	2622.72	-0.37151	0.0684165	1.28224e-06	2213.72	-0.653249	0.0596258	1.631e-26	5548.49	0.841991	0.148601	9.13311e-08	4743.42	0.502377	0.171733	0.00842034	Conserved TNF	Conserved diff
ENSG00000177788	AL162595.1	27.3732	0.142549	0.372685	0.851724	14.8441	-0.472769	0.530257	0.551443	51.3553	-0.819976	0.290979	0.0132334	51.0519	-0.795706	0.2683	0.0074743	NA	Conserved diff
ENSG00000168118	RAB4A	1514.59	-0.0657658	0.0698522	0.614244	1542.09	-0.321145	0.0619347	1.56721e-06	3947.21	0.119362	0.157775	0.588562	3395.34	-0.294193	0.189978	0.196342	Gran-specific TNF	NA
ENSG00000154429	CCSAP	1422.03	-0.23773	0.077438	0.0169291	687.923	-0.308662	0.0820575	0.000800232	1590.27	-0.494719	0.122458	0.000212051	2278.49	0.566337	0.136548	0.000116637	Conserved TNF	Opposite diff
ENSG00000069248	NUP133	3512.7	0.020792	0.0580322	0.863059	1687.18	-0.257592	0.0580888	5.37092e-05	5465.01	-0.649885	0.130476	3.30709e-06	5063.96	-0.900701	0.150658	1.2189e-08	Gran-specific TNF	Conserved diff
ENSG00000135776	ABCB10	4825.03	-0.0833972	0.0621455	0.42606	774.235	-0.178964	0.084145	0.0869577	6889.26	-2.04601	0.129084	7.44937e-55	6672.72	-2.19861	0.145166	2.631e-50	NA	Conserved diff
ENSG00000135801	TAF5L	1712.34	-0.0942888	0.0711875	0.43341	1125.53	0.40184	0.0671668	2.00406e-08	2620	-0.292334	0.12419	0.0436272	2709.62	-0.148562	0.156195	0.455871	Gran-specific TNF	ATRA-specific
ENSG00000135763	URB2	2688.5	-0.0386052	0.0609021	0.74993	753.999	0.049206	0.0836864	0.715367	1844.96	-1.27951	0.191949	2.11818e-10	1896.38	-1.08761	0.208601	8.37998e-07	NA	Conserved diff
ENSG00000143641	GALNT2	1975.78	-0.194814	0.0659053	0.0232039	1758.43	-0.0391701	0.0636221	0.699974	4007.1	0.0690232	0.110626	0.665815	4086.21	0.158154	0.166041	0.455151	Pro-specific TNF	NA
ENSG00000135775	COG2	2279.66	0.0618768	0.0631247	0.594544	1166.53	-0.338313	0.0663253	2.40246e-06	3113.79	-0.519841	0.114095	2.4129e-05	3438.46	-0.156651	0.136897	0.358678	Gran-specific TNF	ATRA-specific
ENSG00000119280	C1orf198	353.061	-0.26553	0.124902	0.14185	89.6894	0.850606	0.208202	0.000230189	189.843	-1.99374	0.179541	2.74216e-27	258.256	-0.471569	0.213402	0.0538049	Gran-specific TNF	ATRA-specific
ENSG00000143643	TTC13	913.815	-0.0941468	0.0833668	0.525979	710.493	-0.227013	0.0795871	0.0150785	1441	-0.469374	0.100787	1.53021e-05	2112.34	0.637789	0.114843	1.37472e-07	Gran-specific TNF	Opposite diff
ENSG00000173409	ARV1	669.152	0.0273696	0.0888915	0.883449	433.994	-0.400231	0.0969846	0.000195094	1572.18	-0.491166	0.197083	0.0312179	1434.19	-0.788674	0.213632	0.000681499	Gran-specific TNF	Conserved diff
ENSG00000182118	FAM89A	298.513	0.0318956	0.125126	0.905373	170.828	0.509833	0.161481	0.00615206	583.013	-1.22633	0.18344	1.86498e-10	549.289	-1.47351	0.208699	1.13861e-11	Gran-specific TNF	Conserved diff
ENSG00000143633	C1orf131	947.636	0.0487438	0.0838764	0.770065	634.766	-0.2958	0.0857198	0.00239188	1420.76	-0.283743	0.19605	0.252356	1366.97	-0.373072	0.22001	0.152412	Gran-specific TNF	NA
ENSG00000116906	GNPAT	2908.32	0.00093554	0.06333	0.99482	1650.14	-0.00718963	0.0602169	0.948528	5815.59	-0.860429	0.162421	6.67568e-07	4830.7	-1.72172	0.18244	4.26168e-20	NA	Conserved diff
ENSG00000010072	SPRTN	769.243	0.236269	0.0839379	0.0332254	555.977	0.0925319	0.0888437	0.473752	978.459	0.0415776	0.11892	0.819392	1143.64	0.486277	0.140137	0.00150027	Pro-specific TNF	TPA-specific
ENSG00000135766	EGLN1	1892.62	-0.0843506	0.067732	0.472909	1698.73	-0.707082	0.0668105	8.7141e-25	5159.01	0.339319	0.118556	0.0117057	4131.23	-0.258691	0.160136	0.175338	Gran-specific TNF	ATRA-specific
ENSG00000233461	AL445524.1	86.6709	0.123095	0.225095	0.785705	65.2556	0.439092	0.24492	0.164836	205.265	-0.218368	0.295341	0.598454	355.262	1.17296	0.292735	0.000205422	NA	TPA-specific
ENSG00000116918	TSNAX	1300.47	0.068582	0.0869158	0.679117	1168.57	-0.681445	0.0752327	2.46958e-18	3702.01	0.373416	0.164398	0.0528152	5527.68	1.30297	0.18539	1.42507e-11	Gran-specific TNF	TPA-specific
ENSG00000162946	DISC1	611.072	-0.105193	0.0968504	0.545584	993.364	-0.412796	0.0706387	4.54349e-08	1893.76	0.389329	0.170039	0.0506349	1547.27	-0.133176	0.187787	0.589814	Gran-specific TNF	NA
ENSG00000116991	SIPA1L2	264.169	-0.134413	0.136756	0.593339	558.648	0.124559	0.0988948	0.365634	375.01	0.520242	0.199993	0.0237025	852.787	2.20383	0.222831	5.57479e-22	NA	Conserved diff
ENSG00000212916	MAP10	336.245	0.118709	0.134972	0.641717	459.736	-0.3328	0.0992456	0.00331117	1056.59	-0.0300672	0.103296	0.851841	792.767	-0.989105	0.121376	3.14209e-15	Gran-specific TNF	TPA-specific
ENSG00000135778	NTPCR	1397.86	-0.261401	0.0708437	0.00253211	802.179	-0.477866	0.076424	3.93761e-09	2676.57	-0.949769	0.164544	5.04821e-08	2455.81	-1.29087	0.188292	4.64786e-11	Conserved TNF	Conserved diff
ENSG00000135749	PCNX2	155.374	-0.368079	0.165861	0.119775	386.453	-0.907001	0.11134	5.79958e-15	168.144	-0.0678067	0.178068	0.802494	345.913	1.61661	0.170099	2.28181e-20	Gran-specific TNF	TPA-specific
ENSG00000143674	MAP3K21	1683.25	-0.276581	0.0679458	0.000638099	115.834	-0.327133	0.181789	0.162964	1697.15	-2.60717	0.16245	3.18916e-56	1527.07	-4.03089	0.156257	1.95556e-144	Pro-specific TNF	Conserved diff
ENSG00000231663	AL355472.1	37.5909	-0.0361075	0.333734	0.961652	26.4029	-0.376419	0.368184	0.483014	48.7167	-0.697275	0.341799	0.0871937	40.4156	-1.49668	0.371524	0.000188792	NA	TPA-specific
ENSG00000168275	COA6	903.365	0.01591	0.0939227	0.939488	488.616	0.103428	0.0926179	0.435153	1577.21	-0.926114	0.296813	0.00543958	1653.41	-0.697779	0.312578	0.0511134	NA	ATRA-specific
ENSG00000059588	TARBP1	3073.67	0.0836973	0.0690973	0.488759	1325.68	-0.241508	0.0764596	0.00612662	6075.51	-0.96672	0.110611	3.14777e-17	5607.31	-1.27396	0.145235	1.69995e-17	Gran-specific TNF	Conserved diff
ENSG00000168264	IRF2BP2	7256.91	0.117234	0.0571176	0.160885	7597.05	-0.071323	0.0545557	0.344097	15368.4	0.0287165	0.135316	0.893624	12649.4	-0.55078	0.162296	0.0019436	NA	TPA-specific
ENSG00000238005	AL391832.2	64.1888	0.613372	0.260901	0.0932755	66.7084	0.879277	0.268014	0.0041884	84.8988	-0.411191	0.186317	0.0609794	194.047	1.61037	0.185699	4.03548e-17	Gran-specific TNF	TPA-specific
ENSG00000258082	AL391832.3	58.0364	0.556081	0.300166	0.220712	48.651	0.874938	0.273781	0.00547306	54.9349	-1.35328	0.236927	7.07522e-08	80.6004	0.0971802	0.205171	0.727689	Gran-specific TNF	ATRA-specific
ENSG00000173726	TOMM20	10411.2	0.0694217	0.0574941	0.490075	4230.18	-0.103509	0.0465473	0.0710675	21575.7	-0.851065	0.187958	2.73568e-05	21829.3	-0.759508	0.212013	0.00101106	NA	Conserved diff
ENSG00000207181	SNORA14B	68.3731	-0.166024	0.244654	0.73059	33.1065	-0.149526	0.350707	0.801118	14.4625	-1.62538	0.431971	0.000611711	13.8918	-1.8221	0.496371	0.000734945	NA	Conserved diff
ENSG00000054267	ARID4B	2050.1	0.324018	0.0756537	0.000274795	3934.8	0.0824284	0.0518291	0.229583	5614.03	1.26627	0.135458	1.36231e-19	5284.75	1.16837	0.148038	2.40824e-14	Pro-specific TNF	Conserved diff
ENSG00000152904	GGPS1	654.76	0.0229886	0.0894224	0.904176	644.18	-0.234954	0.0857201	0.0204037	1843.33	-0.109298	0.154955	0.617971	1797.54	-0.150262	0.182388	0.524502	Gran-specific TNF	NA
ENSG00000116957	TBCE	1110.24	-0.014049	0.0758805	0.932565	713.512	0.0457193	0.0813159	0.729193	2476.45	-0.703911	0.143037	4.4094e-06	2204.09	-1.14128	0.163803	2.16777e-11	NA	Conserved diff
ENSG00000168243	GNG4	312.26	-0.10539	0.129024	0.668277	49.1439	0.643896	0.305016	0.0899425	492.734	-2.41929	0.196034	1.58857e-33	424.213	-4.88096	0.272106	3.19749e-70	NA	Conserved diff
ENSG00000143669	LYST	12936.8	0.512807	0.0531767	3.3809e-20	17116.8	0.123336	0.0467847	0.0268198	23921.7	1.92622	0.2531	2.79488e-13	13271.5	0.766066	0.254575	0.00656299	Conserved TNF	Conserved diff
ENSG00000077585	GPR137B	265.109	0.301239	0.141778	0.142144	790.132	0.274935	0.0825544	0.00356268	794.979	1.18521	0.123435	1.28106e-20	2202.82	3.03159	0.173914	2.29412e-66	Gran-specific TNF	Conserved diff
ENSG00000086619	ERO1B	773.118	0.0832702	0.092571	0.633154	518.082	0.223818	0.0969457	0.0586867	1131.26	-0.310446	0.0955257	0.00361586	964.918	-0.83658	0.113137	1.04766e-12	NA	Conserved diff
ENSG00000116977	LGALS8	1732.44	-0.000270526	0.0734501	0.998763	3828.2	-0.0219947	0.0539895	0.810098	5267.02	1.07223	0.13253	6.82836e-15	5040.1	1.00542	0.133598	3.97014e-13	NA	Conserved diff
ENSG00000273058	AL359921.2	32.9788	-0.203591	0.36958	0.784007	22.5092	0.409982	0.395661	0.47612	64.0207	-0.623493	0.283561	0.0620742	61.8415	-0.706885	0.270495	0.0200933	NA	TPA-specific
ENSG00000230325	AL359921.1	23.2046	-0.100541	0.420966	0.91111	14.2277	0.351701	0.527078	0.672708	26.4357	1.67483	0.431018	0.000385904	19.1669	1.07948	0.526903	0.0766449	NA	ATRA-specific
ENSG00000119285	HEATR1	11059.2	0.010801	0.0513588	0.922627	3901.14	0.102468	0.0536769	0.133811	7039.43	-0.833434	0.248639	0.00259562	6672.35	-0.9995	0.248518	0.000193782	NA	Conserved diff
ENSG00000116984	MTR	5812.71	-0.129745	0.0592581	0.126284	4543.43	-0.283365	0.0504361	1.60743e-07	6879.53	0.145225	0.18669	0.576655	5779.06	-0.334654	0.191553	0.138964	Gran-specific TNF	NA
ENSG00000233355	CHRM3-AS2	93.7309	-0.461854	0.228249	0.168619	91.1746	-1.28281	0.209495	8.65473e-09	863.509	-0.598637	0.142444	0.000109784	564.641	-3.31043	0.174623	2.48326e-78	Gran-specific TNF	Conserved diff
ENSG00000091483	FH	3122.9	0.0128452	0.060038	0.921462	991.327	-0.0738836	0.0693657	0.461527	5092.81	-1.18181	0.2084	8.89509e-08	4723.53	-1.5089	0.240704	2.09525e-09	NA	Conserved diff
ENSG00000117009	KMO	79.182	1.42155	0.232968	2.88343e-08	382.074	0.337646	0.11629	0.0130932	342.217	3.35648	0.195429	2.61857e-64	159.891	2.11269	0.227611	1.79642e-19	Conserved TNF	Conserved diff
ENSG00000054277	OPN3	185.142	0.063366	0.151266	0.835486	300.827	-0.502385	0.119933	0.000151476	196.212	0.36943	0.152896	0.037552	247.042	0.940155	0.193125	4.69425e-06	Gran-specific TNF	Conserved diff
ENSG00000203668	CHML	4799	0.158302	0.0550191	0.028605	1428.62	0.0804027	0.068978	0.41006	3761.55	-1.36535	0.171138	1.66795e-14	3266.25	-2.17738	0.165018	2.12189e-38	Pro-specific TNF	Conserved diff
ENSG00000174371	EXO1	2818.81	0.146497	0.0619204	0.0906979	777.699	0.0282633	0.0760271	0.827853	2038.63	-1.08185	0.150141	5.34871e-12	1482.57	-3.57267	0.176113	1.34813e-89	NA	Conserved diff
ENSG00000235990	RPL23AP20	32.1386	0.122937	0.380744	0.877428	5.60245	1.02179	0.826768	0.377062	19.5459	-0.922033	0.413286	0.0578376	13.5143	-3.60664	0.712956	1.84236e-06	NA	TPA-specific
ENSG00000143702	CEP170	4886.34	0.0338912	0.0623277	0.787109	6588.07	0.0033078	0.0445396	0.967454	7452.8	0.616145	0.213387	0.0108801	8670.79	0.990244	0.218607	2.26479e-05	NA	Conserved diff
ENSG00000054282	SDCCAG8	1206.62	-0.124742	0.0782976	0.318594	2268.15	-0.426275	0.0563572	5.26823e-13	2364.81	0.436587	0.118579	0.000824195	2675.41	0.760786	0.144974	7.02477e-07	Gran-specific TNF	Conserved diff
ENSG00000117020	AKT3	111.005	0.11061	0.189341	0.768857	80.1266	0.526524	0.213121	0.040323	85.5422	-1.02983	0.203608	2.26049e-06	117.326	0.0930297	0.192255	0.721578	Gran-specific TNF	ATRA-specific
ENSG00000179456	ZBTB18	540.222	-0.179913	0.101112	0.246838	1719.61	-1.04133	0.0597573	3.341e-66	3289.87	1.6089	0.0934436	1.26582e-64	2150.65	0.748668	0.119103	1.88516e-09	Gran-specific TNF	Conserved diff
ENSG00000035687	ADSS	4233.24	-0.0244898	0.0626031	0.847504	2109.13	-0.57244	0.0592853	9.61847e-21	6752.25	-0.549393	0.139241	0.000306498	7157.08	-0.312043	0.169918	0.117655	Gran-specific TNF	ATRA-specific
ENSG00000179397	CATSPERE	50.843	0.104351	0.302034	0.86706	42.4302	-1.04721	0.313637	0.00346641	41.5818	-1.08802	0.276027	0.000310985	48.1888	-0.456513	0.275677	0.163569	Gran-specific TNF	ATRA-specific
ENSG00000121644	DESI2	2288.41	0.0628206	0.0637516	0.592546	2145.77	-0.264472	0.0593493	4.88285e-05	4254.7	0.420482	0.121245	0.00175964	3445.03	-0.125679	0.153589	0.527824	Gran-specific TNF	ATRA-specific
ENSG00000203667	COX20	1266.08	-0.0825234	0.0757957	0.54401	1911.44	-0.0798175	0.0576774	0.310599	113.515	0.882513	0.202764	5.85814e-05	67.5541	-0.464263	0.273451	0.15181	NA	ATRA-specific
ENSG00000153187	HNRNPU	43328	0.0547855	0.0469011	0.507299	26136.9	0.343716	0.0405346	3.78318e-16	48611.4	-0.153514	0.0958948	0.1973	43146.7	-0.501087	0.125316	0.00021233	Gran-specific TNF	TPA-specific
ENSG00000272195	AL356512.1	25.3894	-0.341926	0.428545	0.67573	26.0618	0.0733383	0.383797	0.916839	29.5255	-0.595595	0.3272	0.134213	21.2916	-2.16082	0.426146	1.73569e-06	NA	TPA-specific
ENSG00000203666	EFCAB2	427.174	-0.259246	0.105017	0.0732336	170.977	-0.436618	0.157428	0.0186919	529.186	-0.784689	0.111566	1.78008e-11	549.711	-0.594605	0.128616	1.48198e-05	Gran-specific TNF	Conserved diff
ENSG00000162849	KIF26B	36.6888	-0.32308	0.331136	0.596632	55.224	0.633547	0.315464	0.110463	114.858	-1.35662	0.265327	1.71741e-06	146.769	-0.317643	0.244867	0.29126	NA	ATRA-specific
ENSG00000185420	SMYD3	774.569	0.00263254	0.0869344	0.990042	385.024	-0.266074	0.103738	0.0320517	1216.1	-1.00253	0.216956	1.80518e-05	4037.01	2.01187	0.237849	2.46621e-16	Gran-specific TNF	Opposite diff
ENSG00000162851	TFB2M	1513.28	0.0677242	0.0784269	0.648417	430.036	-0.0387137	0.114589	0.844344	2081.77	-1.37747	0.169603	5.31422e-15	2255.28	-0.949706	0.197674	6.3644e-06	NA	Conserved diff
ENSG00000162852	CNST	1489.75	0.0577361	0.0731927	0.679117	862.59	-0.155294	0.0731125	0.0874837	2056.18	-0.485077	0.106474	2.41715e-05	2645.41	0.302718	0.135393	0.0506986	NA	ATRA-specific
ENSG00000143653	SCCPDH	2524.3	-0.0271268	0.067131	0.842422	1590.43	-0.340219	0.06246	4.02435e-07	6376.96	-0.67672	0.225166	0.00772279	5863.52	-0.967814	0.241515	0.000205147	Gran-specific TNF	Conserved diff
ENSG00000260855	AL591848.4	172.766	-0.463102	0.162673	0.0307479	155.921	-0.95725	0.164341	5.06392e-08	162.658	-0.616442	0.374409	0.182775	134.751	-1.3561	0.405464	0.00228901	Conserved TNF	TPA-specific
ENSG00000227953	LINC01341	105.387	-0.428214	0.223922	0.200776	102.73	-1.15286	0.204834	1.52273e-07	125.266	-0.883879	0.236339	0.000665663	102.189	-1.85969	0.289253	7.63982e-10	Gran-specific TNF	Conserved diff
ENSG00000153207	AHCTF1	8215.44	0.136088	0.054664	0.0702415	2722.22	0.153916	0.0507115	0.00894571	6660.73	-0.912005	0.180784	2.4138e-06	6451.87	-0.990828	0.190627	9.09612e-07	Gran-specific TNF	Conserved diff
ENSG00000277462	ZNF670	297.886	0.257628	0.127086	0.167807	161.468	-0.195017	0.159058	0.381952	447.018	-0.834151	0.154108	3.63689e-07	362.698	-1.83332	0.197093	1.50204e-19	NA	Conserved diff
ENSG00000188295	ZNF669	286.921	-0.0211594	0.131299	0.941965	273.803	-0.0152824	0.119037	0.944452	587.783	0.0442509	0.15591	0.856022	458.235	-0.728425	0.195913	0.000618771	NA	TPA-specific
ENSG00000196418	ZNF124	1407.91	0.0636187	0.0752716	0.655684	2302.19	-0.195495	0.0546096	0.00153672	1498.77	1.01061	0.107054	5.80709e-20	993.733	0.0350895	0.126055	0.84444	Gran-specific TNF	ATRA-specific
ENSG00000227671	AL390728.4	1035.88	0.252469	0.0758108	0.00809996	1753.89	0.257832	0.0571567	3.84684e-05	3078.57	0.432302	0.179779	0.0386177	2864.94	0.282557	0.22425	0.306879	Conserved TNF	ATRA-specific
ENSG00000162714	ZNF496	1049.39	-0.0791947	0.0803263	0.592461	673.883	0.104753	0.0995889	0.468528	2664.28	-0.670941	0.116736	5.80408e-08	2333.77	-1.16918	0.136343	9.22319e-17	NA	Conserved diff
ENSG00000162711	NLRP3	518.751	0.798065	0.107202	3.90368e-12	634.331	1.55182	0.0883625	3.13518e-67	1304.01	0.562288	0.119656	1.25982e-05	1689.3	1.16863	0.185728	1.8154e-09	Conserved TNF	Conserved diff
ENSG00000175137	SH3BP5L	895.887	-0.276968	0.0898723	0.0163427	964.303	-0.571228	0.0757209	6.10218e-13	3408.71	0.470759	0.152622	0.00607793	3912.3	0.82406	0.193083	7.06304e-05	Conserved TNF	Conserved diff
ENSG00000171161	ZNF672	647.008	-0.391641	0.100806	0.00127323	890.268	-1.1611	0.074717	9.20537e-53	2129.38	0.571332	0.113592	2.6013e-06	1665.06	-0.0487186	0.17135	0.841017	Conserved TNF	ATRA-specific
ENSG00000171163	ZNF692	946.816	-0.00747816	0.0946373	0.972506	384.478	-0.618287	0.122104	2.88903e-06	3598.48	-1.16807	0.174634	1.82155e-10	3193.78	-1.74811	0.183015	1.45195e-20	Gran-specific TNF	Conserved diff
ENSG00000185220	PGBD2	273.691	-0.442753	0.137721	0.0113401	275.062	-1.05783	0.132645	2.26303e-14	804.716	0.295561	0.107932	0.0165325	729.934	0.0652495	0.129315	0.708932	Conserved TNF	ATRA-specific
ENSG00000035115	SH3YL1	143.372	-0.0231516	0.173519	0.951406	254.127	-0.693247	0.138424	3.77918e-06	513.334	-0.0697958	0.166127	0.782091	559.808	0.213501	0.203407	0.40516	Gran-specific TNF	NA
ENSG00000143727	ACP1	2509.49	0.142736	0.0619487	0.101994	1539.7	0.136257	0.0619783	0.0749825	6593.98	-0.777036	0.205989	0.000590621	6369.82	-0.870418	0.227588	0.000415721	NA	Conserved diff
ENSG00000151353	TMEM18	645.624	-0.130838	0.0920274	0.391577	451.8	0.0723864	0.101421	0.647801	2199.52	-0.479343	0.140177	0.0020723	1901.52	-0.993673	0.158517	2.09644e-09	NA	Conserved diff
ENSG00000171853	TRAPPC12	1904	0.131159	0.0744685	0.253333	2105.36	0.170884	0.0572311	0.0102948	2529.8	0.170071	0.119014	0.259217	2769.3	0.437575	0.151148	0.00919579	Gran-specific TNF	TPA-specific
ENSG00000182551	ADI1	1923.36	-0.0877759	0.0692088	0.460688	3532.63	-0.292557	0.0520002	1.54029e-07	4458.28	0.97739	0.196546	3.43662e-06	5288.09	1.35696	0.21795	2.72812e-09	Gran-specific TNF	Conserved diff
ENSG00000171865	RNASEH1	1553.67	0.0454808	0.0676877	0.734253	770.057	0.25498	0.0803655	0.00586849	1617.09	-0.364368	0.134184	0.0175627	1701.08	-0.162963	0.160005	0.420767	Gran-specific TNF	ATRA-specific
ENSG00000234171	RNASEH1-AS1	265.387	-0.0458233	0.154121	0.888268	77.1474	0.0317029	0.227449	0.939894	486.048	-1.46393	0.189482	1.16804e-13	441.69	-1.98814	0.226831	1.80315e-17	NA	Conserved diff
ENSG00000171863	RPS7	23127.8	-0.0276797	0.0669814	0.837782	15594.5	0.114233	0.0463715	0.0410395	94044.1	-0.588518	0.251279	0.0448352	83260.8	-1.02883	0.274043	0.000541594	Gran-specific TNF	Conserved diff
ENSG00000134326	CMPK2	37.5216	0.378745	0.327496	0.513274	149.467	-0.650378	0.164766	0.000397443	1939.1	4.83957	0.178984	1.41226e-158	236.283	1.40829	0.190135	9.56512e-13	Gran-specific TNF	Conserved diff
ENSG00000151692	RNF144A	847.488	-0.0428299	0.0803637	0.791205	1305.6	-0.257202	0.0641836	0.000314267	2529.67	1.11058	0.151644	2.30612e-12	1439.72	-0.283574	0.17458	0.172784	Gran-specific TNF	ATRA-specific
ENSG00000115738	ID2	979.783	0.0155152	0.082975	0.931724	3525.63	0.0382269	0.0492122	0.614706	3633.64	2.24302	0.152323	1.96088e-47	10328.3	3.953	0.189196	5.39331e-95	NA	Conserved diff
ENSG00000134313	KIDINS220	3649.98	0.0635419	0.0566102	0.528947	4279.08	0.0157109	0.0499965	0.85613	4894.93	0.716289	0.190185	0.000603721	5331.44	0.938815	0.197771	8.33919e-06	NA	Conserved diff
ENSG00000119185	ITGB1BP1	2104.94	-0.0770699	0.0712513	0.547324	1011.83	0.449507	0.0708914	2.29609e-09	2717.58	-0.985971	0.227373	6.26899e-05	4804.27	0.757051	0.24124	0.00443403	Gran-specific TNF	Opposite diff
ENSG00000119203	CPSF3	3152.53	-0.00121034	0.0594289	0.993081	1910.21	-0.240472	0.0646407	0.000932533	5569.61	-0.48209	0.190567	0.0284346	5760	-0.331218	0.208525	0.183761	Gran-specific TNF	ATRA-specific
ENSG00000151694	ADAM17	1677.25	0.342188	0.069721	1.74854e-05	4383.12	1.38967	0.0495373	7.38898e-171	2774.38	1.14984	0.180392	1.38848e-09	4389.91	2.0567	0.190794	6.19592e-26	Conserved TNF	Conserved diff
ENSG00000134308	YWHAQ	12744.4	-0.015158	0.0544874	0.896265	6018.88	0.0962545	0.0434097	0.0721075	14713.7	-0.515679	0.157869	0.00342946	17862.6	0.120977	0.192626	0.636565	NA	ATRA-specific
ENSG00000115750	TAF1B	945.8	0.0915161	0.0894488	0.57605	537.718	0.096488	0.0954999	0.488846	761.784	-0.854247	0.124293	5.31561e-11	849.491	-0.408726	0.137382	0.00726941	NA	Conserved diff
ENSG00000269973	AC010969.2	175.326	-0.0388546	0.165689	0.912395	100.147	-0.225812	0.201548	0.433242	165.529	-1.13646	0.22048	1.39192e-06	205.902	-0.266788	0.224815	0.339091	NA	ATRA-specific
ENSG00000171848	RRM2	5700.79	0.328582	0.0569136	1.9823e-07	3049.48	0.181524	0.0684958	0.0258817	4962.16	0.0170875	0.160716	0.947524	2912.65	-2.36097	0.218046	3.69955e-26	Conserved TNF	TPA-specific
ENSG00000284681	AC007240.1	344.09	-0.0889853	0.156722	0.776364	85.2529	0.0757236	0.227495	0.846658	279.64	-1.00504	0.198524	2.20695e-06	201.508	-3.38782	0.250877	3.53367e-40	NA	Conserved diff
ENSG00000163009	C2orf48	480.303	-0.134797	0.249439	0.788284	111.538	-0.15854	0.209318	0.625033	617.864	-1.23497	0.279444	4.39245e-05	453.456	-4.03954	0.299254	3.78314e-40	NA	Conserved diff
ENSG00000115756	HPCAL1	1127.35	-0.147156	0.0843946	0.259592	4255.3	0.159719	0.0510625	0.00673618	9747.21	2.15176	0.182791	1.4501e-30	12667.1	2.62219	0.209502	1.22118e-34	Gran-specific TNF	Conserved diff
ENSG00000115758	ODC1	11152	-0.00480213	0.0631755	0.973139	1523.93	-0.0318571	0.0600599	0.746834	9015.75	-1.86228	0.208991	7.06223e-18	8295.43	-2.42358	0.24468	4.81397e-22	NA	Conserved diff
ENSG00000206633	SNORA80B	50.3188	-0.00116389	0.281388	0.998585	13.0156	-0.314617	0.56015	0.729486	4.87366	-1.89509	0.787689	0.0384997	4.03379	-3.8482	1.23245	0.00465311	NA	Conserved diff
ENSG00000257135	AC007249.2	22.3615	-0.359759	0.448062	0.673922	5.79127	-0.531933	0.844732	0.691624	14.2736	-1.70028	0.492435	0.00185343	15.0724	-1.32361	0.479863	0.0135448	NA	Conserved diff
ENSG00000115761	NOL10	3559	0.0970434	0.0631676	0.342289	1331.13	-0.0631968	0.0660766	0.51682	2925.77	-1.10979	0.164486	1.23623e-10	2919.52	-1.06716	0.193327	1.65158e-07	NA	Conserved diff
ENSG00000272275	AC092687.3	39.5264	0.246044	0.314795	0.682778	18.5533	-0.394258	0.44204	0.551302	54.4647	-0.445345	0.270838	0.183367	84.5182	0.785494	0.270106	0.0088482	NA	TPA-specific
ENSG00000143870	PDIA6	12125.4	-0.030635	0.0530881	0.772479	5839.05	0.0638546	0.0448317	0.293382	12327	-0.307849	0.149243	0.0832443	10177.6	-0.970308	0.194318	2.55112e-06	NA	TPA-specific
ENSG00000162976	PQLC3	126.772	-0.39275	0.183978	0.139332	542.76	-0.400385	0.0955542	0.000150749	689.638	1.41577	0.180553	4.83738e-14	780.726	1.6775	0.205201	2.55674e-15	Gran-specific TNF	Conserved diff
ENSG00000134318	ROCK2	2442.75	-0.0048292	0.062415	0.972784	1830.71	0.228037	0.0588167	0.000519698	2661.4	-0.156801	0.183982	0.53609	3203.17	0.393188	0.182868	0.0614283	Gran-specific TNF	NA
ENSG00000169016	E2F6	979.351	0.0933014	0.0772781	0.490075	826.113	0.651184	0.0746604	4.77951e-17	1381.61	-0.184371	0.125731	0.245001	1599.11	0.26557	0.152598	0.140677	Gran-specific TNF	NA
ENSG00000134324	LPIN1	1279.6	-0.12242	0.0776004	0.324675	979.172	0.171997	0.0718521	0.0482792	2480.18	0.505703	0.192658	0.0223005	4029.06	1.57615	0.153773	1.54735e-23	Gran-specific TNF	Conserved diff
ENSG00000071575	TRIB2	325.37	-0.615792	0.118577	4.35361e-06	518.716	-2.21206	0.109078	1.74839e-89	1392.23	1.02823	0.113155	1.47731e-18	2041.63	1.81282	0.140845	1.38587e-36	Conserved TNF	Conserved diff
ENSG00000079785	DDX1	7595.01	0.155285	0.0556143	0.0350941	2608.12	-0.0184318	0.0576479	0.853079	8301.83	-0.840347	0.177375	1.05444e-05	7633.17	-1.15348	0.204952	9.08932e-08	Pro-specific TNF	Conserved diff
ENSG00000197872	FAM49A	469.502	-0.325566	0.102253	0.0123676	1324.52	-1.31339	0.0664609	5.43219e-85	2869.3	1.23562	0.125858	1.63513e-21	3858.67	1.83451	0.167606	1.04392e-26	Conserved TNF	Conserved diff
ENSG00000163029	SMC6	1931.9	0.156426	0.0715966	0.127066	1126.04	-0.0524196	0.071714	0.638762	2016.18	-0.747245	0.129963	5.7369e-08	1849.85	-1.04971	0.135971	9.11422e-14	NA	Conserved diff
ENSG00000178295	GEN1	2970.91	0.259451	0.0731883	0.00412155	2402.56	0.184374	0.059102	0.0069152	2553.48	0.0335969	0.151665	0.888676	1798.92	-1.16819	0.179531	4.66103e-10	Conserved TNF	TPA-specific
ENSG00000240857	RDH14	318.807	-0.107555	0.12083	0.637325	174.592	-0.0141524	0.151984	0.959767	719.955	-0.888543	0.234804	0.00056567	716.991	-0.861434	0.258804	0.00241202	NA	Conserved diff
ENSG00000183891	TTC32	219.767	0.0494309	0.156286	0.880214	198.078	-0.137541	0.14389	0.517124	618.538	-0.494611	0.12347	0.00024188	509.717	-1.23033	0.140315	1.75078e-17	NA	Conserved diff
ENSG00000118965	WDR35	2573.6	-0.037694	0.0782993	0.810946	669.496	-0.0655657	0.0873356	0.628004	2399.97	-1.62997	0.130299	2.00002e-34	2378.6	-1.60575	0.13735	2.42704e-30	NA	Conserved diff
ENSG00000068697	LAPTM4A	860.328	-0.182622	0.0981186	0.218009	1152.23	-0.367301	0.0659048	2.04315e-07	4346.58	0.317326	0.20337	0.211079	7013.85	1.41428	0.22962	4.10539e-09	Gran-specific TNF	TPA-specific
ENSG00000115884	SDC1	640.146	-0.75959	0.102133	4.11234e-12	282.552	-1.0451	0.124661	8.42171e-16	1800.45	-0.623625	0.13615	2.16641e-05	1178.13	-3.44789	0.199639	3.6947e-65	Conserved TNF	Conserved diff
ENSG00000055917	PUM2	7914.66	-0.0328842	0.0555491	0.76692	6094.33	-0.225786	0.0473028	1.1622e-05	13059.6	0.0188688	0.14646	0.936	13907.7	0.228314	0.16175	0.244756	Gran-specific TNF	NA
ENSG00000118960	HS1BP3	239.191	-0.124561	0.146122	0.653019	669.953	0.118108	0.0820783	0.287586	799.136	0.754596	0.120329	2.6351e-09	1521.66	2.06317	0.175625	1.2586e-30	NA	Conserved diff
ENSG00000118961	LDAH	1349.15	0.0530996	0.0780108	0.729456	1002.42	-0.251922	0.0696742	0.00135456	2282.26	-0.0998709	0.136734	0.603657	2019.9	-0.451478	0.166037	0.0151062	Gran-specific TNF	TPA-specific
ENSG00000119778	ATAD2B	2267.13	0.143567	0.0655461	0.12611	2515.64	-0.265127	0.0543862	7.2011e-06	2528.25	0.691493	0.165156	0.000116998	2366.49	0.565962	0.172932	0.00289715	Gran-specific TNF	Conserved diff
ENSG00000173960	UBXN2A	629.958	0.1059	0.0932354	0.522918	383.094	0.393058	0.107517	0.00117501	877.501	-0.330089	0.132768	0.0316632	787.005	-0.666802	0.162092	0.000133969	Gran-specific TNF	Conserved diff
ENSG00000163026	WDCP	1271.26	-0.0189538	0.0738107	0.904347	489.125	-0.070348	0.101529	0.659336	1633.53	-0.959283	0.157188	7.34722e-09	1537.39	-1.17407	0.180996	5.30134e-10	NA	Conserved diff
ENSG00000115128	SF3B6	2911.14	0.0550867	0.0695278	0.677733	1485.6	0.133805	0.0688017	0.12521	5066.57	-0.792712	0.291911	0.0175562	5089.43	-0.734783	0.304032	0.0330339	NA	Conserved diff
ENSG00000219626	FAM228B	167.271	-0.0492339	0.165272	0.888128	367.51	0.0436108	0.106883	0.809936	431.794	0.175505	0.281871	0.666405	324.71	-0.678155	0.291048	0.0407341	NA	TPA-specific
ENSG00000115129	TP53I3	82.6883	-0.0957157	0.242085	0.845951	147.733	0.254709	0.179907	0.297074	319.75	0.392432	0.189833	0.0825239	616.973	1.81329	0.209071	3.99636e-17	NA	TPA-specific
ENSG00000198399	ITSN2	2529.85	0.550236	0.0668616	9.07857e-15	4039.05	0.319526	0.0504804	2.45325e-09	4260.44	0.863961	0.168051	1.49145e-06	4895.82	1.19115	0.176762	1.0176e-10	Conserved TNF	Conserved diff
ENSG00000184924	PTRHD1	436.575	0.0301986	0.113118	0.900568	569.416	0.001222	0.0873683	0.993749	926.985	0.033482	0.270434	0.938594	714.628	-0.795536	0.288025	0.0134049	NA	TPA-specific
ENSG00000138092	CENPO	2663.16	-0.0155812	0.0621179	0.907003	1320.38	0.0715806	0.0666136	0.456867	1654.36	-0.330257	0.125198	0.021569	1160.78	-1.85845	0.141314	3.75192e-38	NA	Conserved diff
ENSG00000138031	ADCY3	594.273	-0.19817	0.10513	0.210041	165.066	0.711688	0.161678	6.18615e-05	797.257	-1.52018	0.189778	1.29045e-14	1523.39	0.688012	0.209531	0.00279948	Gran-specific TNF	Opposite diff
ENSG00000271936	AC012073.1	196.209	-0.064308	0.148363	0.83076	121.403	0.0663158	0.176045	0.825235	173.786	-0.236471	0.177978	0.300152	116.768	-1.93705	0.238664	4.09307e-15	NA	TPA-specific
ENSG00000224165	DNAJC27-AS1	23.3196	-0.0137932	0.433715	0.989827	36.405	-0.654963	0.324332	0.107962	24.204	1.18439	0.330723	0.00118566	23.5818	1.14999	0.339704	0.00200028	NA	Conserved diff
ENSG00000119772	DNMT3A	578.063	0.19309	0.102963	0.213195	3343.82	0.0941539	0.0585699	0.2238	2765.72	2.14461	0.153675	1.13929e-42	4710.61	3.06312	0.157172	9.59019e-83	NA	Conserved diff
ENSG00000138101	DTNB	370.799	-0.0937225	0.117042	0.674596	167.4	-0.329757	0.154331	0.085157	436.474	-0.957101	0.149923	1.30656e-09	422.912	-1.04543	0.188607	1.45609e-07	NA	Conserved diff
ENSG00000143970	ASXL2	4477.48	-0.14022	0.0683787	0.1614	4707.34	-0.145117	0.056182	0.030672	6176.09	0.609799	0.291215	0.0779144	6279.73	0.682322	0.289441	0.0381964	Gran-specific TNF	TPA-specific
ENSG00000084731	KIF3C	138.574	-0.537429	0.178695	0.020198	225.83	-0.639318	0.132905	9.78489e-06	1779.75	2.31719	0.15722	1.62547e-47	1713.21	2.27352	0.18357	6.15796e-34	Conserved TNF	Conserved diff
ENSG00000084733	RAB10	4539.79	0.159014	0.0533595	0.0217796	4239.43	0.258154	0.0469559	3.06958e-07	9863.3	0.376442	0.135088	0.0144574	10098	0.466186	0.170652	0.0145809	Conserved TNF	Conserved diff
ENSG00000084754	HADHA	11219.4	-0.0583792	0.0532017	0.540752	7327.79	-0.0291208	0.0497594	0.716745	27579.4	-0.327579	0.172516	0.115649	23355.9	-0.890642	0.205494	5.33035e-05	NA	TPA-specific
ENSG00000138029	HADHB	3666.6	-0.0153626	0.056222	0.898515	2480.25	0.0165385	0.0537946	0.859641	8383.11	-0.552558	0.186037	0.0085566	8351.07	-0.52576	0.208993	0.0258577	NA	Conserved diff
ENSG00000173567	ADGRF3	35.2576	-0.155283	0.332186	0.81739	40.3484	0.274687	0.312697	0.558479	68.0548	-0.166598	0.24075	0.625788	46.0656	-1.72281	0.349039	3.38037e-06	NA	TPA-specific
ENSG00000138018	SELENOI	4773.47	0.136767	0.0629428	0.129667	1501.46	0.166598	0.0644531	0.0305372	3717.91	-0.792944	0.154929	1.67293e-06	3564.23	-0.91054	0.16062	7.24286e-08	Gran-specific TNF	Conserved diff
ENSG00000213699	SLC35F6	1001.09	-0.160099	0.0846734	0.208139	589.251	-0.036617	0.085214	0.799347	1156.47	-0.818839	0.108542	4.57214e-13	1495.36	0.0722167	0.152243	0.727278	NA	ATRA-specific
ENSG00000115163	CENPA	834.768	-0.123138	0.0870363	0.394309	365.718	-0.458702	0.113463	0.00027319	916.248	-1.00884	0.205234	4.53222e-06	659.46	-3.48261	0.242176	1.94758e-45	Gran-specific TNF	Conserved diff
ENSG00000084693	AGBL5	742.025	-0.0899749	0.0907012	0.589381	308.44	-0.15059	0.113922	0.337495	1982.79	-0.948455	0.103489	7.30873e-19	1662.42	-1.79233	0.120176	8.34202e-49	NA	Conserved diff
ENSG00000228474	OST4	2437.55	-0.0443743	0.168763	0.901678	2385.57	0.164732	0.0619928	0.0254478	5205.53	0.153199	0.244358	0.663871	6141.42	0.603049	0.276282	0.057114	Gran-specific TNF	NA
ENSG00000138080	EMILIN1	35.2557	0.0375348	0.351519	0.962314	35.3747	-1.21366	0.354816	0.00264523	289.571	0.427339	0.145943	0.00968833	271.641	0.289243	0.206659	0.24927	Gran-specific TNF	ATRA-specific
ENSG00000138030	KHK	160.043	-0.490017	0.170895	0.0292282	21.0507	-0.801055	0.442222	0.159653	353.639	-2.32003	0.193801	1.3926e-31	333.242	-2.79821	0.223067	8.65587e-35	Pro-specific TNF	Conserved diff
ENSG00000138073	PREB	2146.82	-0.0108053	0.0711847	0.94516	1271.48	0.0421865	0.0688716	0.701889	4399.64	-0.245131	0.193602	0.326237	5832.01	0.557706	0.230189	0.0325559	NA	TPA-specific
ENSG00000138074	SLC5A6	4175.18	-0.0262599	0.0562614	0.817592	1159.47	0.497112	0.0663909	9.2271e-13	5480.08	-1.25419	0.109244	4.09178e-29	6789.01	-0.356912	0.144918	0.0294986	Gran-specific TNF	Conserved diff
ENSG00000084774	CAD	7799.7	-0.174486	0.0727853	0.0850717	2042.28	-0.0587074	0.0595762	0.502416	11182.9	-1.24547	0.18858	3.16909e-10	9703.12	-1.99841	0.201158	3.61313e-22	NA	Conserved diff
ENSG00000115204	MPV17	982.315	-0.128131	0.0878835	0.374507	1025.81	-0.0983694	0.0726426	0.323063	2803.93	0.372711	0.0781205	9.01952e-06	2892.3	0.482557	0.108847	3.47913e-05	NA	Conserved diff
ENSG00000234072	AC074117.1	289.007	-0.0713058	0.125259	0.775684	141.962	0.173396	0.172944	0.492889	708.018	-1.24932	0.174584	7.57919e-12	633.927	-1.79162	0.183557	1.96543e-21	NA	Conserved diff
ENSG00000115211	EIF2B4	1270.13	-0.00659178	0.0758107	0.970276	808.276	0.130123	0.0766206	0.193823	2947.2	-0.419751	0.160641	0.0230081	3117.82	-0.200194	0.176838	0.364495	NA	ATRA-specific
ENSG00000115234	SNX17	2197.75	-0.159121	0.0764496	0.153061	2212.25	-0.219178	0.0565102	0.00051724	8930.48	0.0669526	0.197931	0.825654	9225.92	0.188018	0.230241	0.528763	Gran-specific TNF	NA
ENSG00000163795	ZNF513	257.963	0.167993	0.130573	0.451228	601.32	0.409534	0.0915436	4.52579e-05	957.478	1.38029	0.117896	3.04794e-30	943.65	1.37555	0.147959	1.57084e-19	Gran-specific TNF	Conserved diff
ENSG00000115241	PPM1G	6399.95	-0.0622966	0.057896	0.550442	2390.11	-0.0935628	0.0650376	0.287679	13552.5	-1.20891	0.208536	4.38056e-08	13347.5	-1.22831	0.240262	1.40272e-06	NA	Conserved diff
ENSG00000115216	NRBP1	1736.44	-0.108011	0.0674683	0.315325	2282.27	0.0404009	0.0592587	0.665221	6064.98	0.714869	0.130914	2.82328e-07	7434.52	1.18685	0.177399	1.40337e-10	NA	Conserved diff
ENSG00000138002	IFT172	772.507	-0.170519	0.0982753	0.262539	318.462	-0.459509	0.115622	0.000357634	1313.19	-0.577051	0.143073	0.000217565	1052.28	-1.487	0.172866	7.34279e-17	Gran-specific TNF	Conserved diff
ENSG00000243943	ZNF512	802.232	-0.148643	0.0851045	0.258578	889.056	-0.169118	0.0807635	0.093053	2255.55	-0.292361	0.172636	0.16853	1593.13	-1.74706	0.189916	3.81671e-19	NA	TPA-specific
ENSG00000176714	CCDC121	50.4248	-0.664124	0.299122	0.119571	150.16	-0.790297	0.167023	1.4104e-05	261.903	2.25576	0.160863	4.46994e-43	86.3811	-0.123348	0.24055	0.704205	Gran-specific TNF	ATRA-specific
ENSG00000198522	GPN1	1551.58	0.0625015	0.0699579	0.636223	787.687	-0.199358	0.0825281	0.0458741	3163.44	-0.570258	0.192075	0.00858666	3011.66	-0.710062	0.213737	0.00246341	Gran-specific TNF	Conserved diff
ENSG00000119760	SUPT7L	1587.04	0.0638329	0.0750979	0.654037	1766.52	0.121291	0.063106	0.130709	3965.81	0.320305	0.0904314	0.00135868	3657.16	0.136166	0.113306	0.332316	NA	ATRA-specific
ENSG00000243147	MRPL33	1060.99	-0.0560313	0.10812	0.79696	1015.54	0.207499	0.0702553	0.0113147	3538.04	-0.399207	0.270427	0.241385	4209.83	0.156172	0.284833	0.683157	Gran-specific TNF	NA
ENSG00000171174	RBKS	25.464	-0.303426	0.454411	0.736137	85.9617	-0.162771	0.204439	0.603591	148.562	1.66782	0.253916	4.01198e-10	116.475	1.20413	0.277728	5.29639e-05	NA	Conserved diff
ENSG00000158019	BABAM2	563.848	-0.075287	0.0944226	0.676069	586.386	-0.309637	0.0874036	0.00174864	1633.21	0.0434935	0.19108	0.885676	1866.6	0.429815	0.223629	0.0995002	Gran-specific TNF	NA
ENSG00000075426	FOSL2	1205.57	-1.16971	0.0837496	3.48338e-42	748.721	0.0773274	0.0854042	0.543489	4081.03	-1.18311	0.249372	1.02195e-05	4764.98	-0.506242	0.193012	0.0195937	Pro-specific TNF	Conserved diff
ENSG00000163803	PLB1	320.298	-0.738604	0.123127	5.33529e-08	1358.58	-0.890086	0.0670726	1.30394e-38	1820.98	2.13164	0.08897	1.28183e-124	570.264	-0.499916	0.126921	0.000268244	Conserved TNF	Opposite diff
ENSG00000213639	PPP1CB	7938.37	0.0839337	0.0590866	0.391803	6842.54	-0.15492	0.061771	0.0368302	11271.1	0.407298	0.154683	0.0218389	11287.1	0.440276	0.183327	0.034319	Gran-specific TNF	Conserved diff
ENSG00000171103	TRMT61B	682.804	0.199197	0.0885148	0.112876	442.477	-0.052484	0.0990449	0.747078	772.939	-0.717958	0.143418	2.92383e-06	696.136	-1.10439	0.167566	2.7008e-10	NA	Conserved diff
ENSG00000163811	WDR43	8249.63	0.121552	0.0574243	0.144174	2358.22	0.097307	0.0538788	0.161151	7041.27	-1.2231	0.128885	3.65592e-20	7258.17	-1.02777	0.161169	1.06503e-09	NA	Conserved diff
ENSG00000265706	SNORD53B	54.0429	0.225231	0.294535	0.691057	23.3187	-0.246834	0.459422	0.743	7.06523	-1.81474	0.674219	0.0186891	6.74547	-2.03823	0.723579	0.0115027	NA	Conserved diff
ENSG00000189350	TOGARAM2	24.6077	-0.482027	0.412427	0.507054	337.771	-1.16639	0.128245	1.77228e-18	427.787	3.8558	0.170528	4.86202e-111	446.922	3.94324	0.176732	3.18026e-108	Gran-specific TNF	Conserved diff
ENSG00000119801	YPEL5	304.901	-0.298725	0.13148	0.108466	1492.61	-0.451654	0.0640906	2.14882e-11	3520.19	1.72362	0.170279	8.17237e-23	3782.11	1.87804	0.197878	2.57669e-20	Gran-specific TNF	Conserved diff
ENSG00000172954	LCLAT1	2101.52	0.0575699	0.0711278	0.671011	1173.39	-0.371702	0.0691278	5.82638e-07	1381.3	-0.229987	0.156951	0.245379	1223.13	-0.596249	0.174767	0.00182805	Gran-specific TNF	TPA-specific
ENSG00000162961	DPY30	932.062	0.002868	0.0787088	0.988184	443.508	-0.168327	0.0987103	0.191315	1826.39	-0.704892	0.255546	0.0156462	1815.97	-0.686227	0.275316	0.0274024	NA	Conserved diff
ENSG00000021574	SPAST	1761.61	-0.0730784	0.0695448	0.563396	1448.77	-0.557604	0.0690334	1.00329e-14	3179.25	0.254302	0.113161	0.0558431	3077.35	0.199943	0.152883	0.286812	Gran-specific TNF	NA
ENSG00000091106	NLRC4	37.5785	-1.13537	0.340339	0.00797481	1063.94	-1.09051	0.0844421	1.33917e-36	2255.74	3.75222	0.14132	6.48946e-153	1236.6	2.81337	0.17826	1.49981e-54	Conserved TNF	Conserved diff
ENSG00000119820	YIPF4	1670.45	0.00413737	0.0678696	0.980015	2103.84	-0.284166	0.0786048	0.00135677	5417.03	0.310824	0.0918759	0.00234455	5539.16	0.399597	0.116847	0.00178049	Gran-specific TNF	Conserved diff
ENSG00000018699	TTC27	2011.54	0.164994	0.0690621	0.0863548	608.947	0.293638	0.0949269	0.00750371	1516.94	-1.55261	0.203194	2.22104e-13	1472.2	-1.66202	0.227525	2.00697e-12	Gran-specific TNF	Conserved diff
ENSG00000152689	RASGRP3	86.8087	-0.308662	0.241934	0.457017	1452.06	-0.638544	0.0635083	1.93977e-22	1316.85	2.89733	0.138086	1.11882e-95	2769.6	4.08764	0.148721	6.66204e-164	Gran-specific TNF	Conserved diff
ENSG00000119812	FAM98A	3200.22	0.103947	0.0630139	0.294789	1074.25	0.219813	0.0773534	0.0155138	2432.23	-1.10638	0.149108	1.14408e-12	2698.55	-0.634544	0.181328	0.00135867	Gran-specific TNF	Conserved diff
ENSG00000150938	CRIM1	1252.64	-0.0883089	0.0754955	0.506695	791.952	0.288386	0.084854	0.00285062	1514.01	-0.426897	0.146794	0.0102554	3317.74	1.52151	0.172559	1.14401e-17	Gran-specific TNF	Opposite diff
ENSG00000171055	FEZ2	1218.61	0.108835	0.0752946	0.380276	1886.89	0.05639	0.0610513	0.533571	1977.6	0.369487	0.17904	0.0830933	2137.66	0.590389	0.203031	0.00885359	NA	TPA-specific
ENSG00000205221	VIT	129.55	1.01046	0.199479	8.18282e-06	186.624	0.0642218	0.147686	0.796818	65.9855	1.45795	0.279247	9.9066e-07	19.1773	-3.33259	0.551612	8.35839e-09	Pro-specific TNF	Opposite diff
ENSG00000008869	HEATR5B	2594.39	0.0284083	0.0675621	0.835245	3376.7	-0.25717	0.0498322	1.77489e-06	5561.68	0.6652	0.234678	0.0126376	4243.47	1.95631e-05	0.238405	0.999972	Gran-specific TNF	ATRA-specific
ENSG00000152133	GPATCH11	1584.07	0.145824	0.0745933	0.187765	1258.02	-0.346869	0.0688676	3.29558e-06	2333.75	-0.242111	0.13392	0.137321	2340.17	-0.195054	0.161735	0.330474	Gran-specific TNF	NA
ENSG00000055332	EIF2AK2	2815.1	-0.0090861	0.0684006	0.951676	3585.19	-0.181269	0.0594177	0.00853497	10484.8	2.20368	0.18122	1.42981e-32	5597.64	1.02383	0.18895	2.85372e-07	Gran-specific TNF	Conserved diff
ENSG00000218739	CEBPZOS	2128.42	-0.0172278	0.0645473	0.900568	1539.57	-0.0172733	0.0634888	0.87727	4664.21	-0.524931	0.200837	0.0229649	4378.93	-0.714703	0.215934	0.00256673	NA	Conserved diff
ENSG00000115816	CEBPZ	5697.01	0.166328	0.0600496	0.0371319	2204.09	0.0649073	0.0566011	0.420009	4462.37	-1.07599	0.139807	1.46666e-13	4531.57	-0.956189	0.166061	4.37963e-08	Pro-specific TNF	Conserved diff
ENSG00000003509	NDUFAF7	1032.12	0.0724425	0.0778709	0.618452	897.269	0.126379	0.0760984	0.205937	1637.97	-0.517612	0.139209	0.000722344	1582.63	-0.597714	0.150506	0.000236749	NA	Conserved diff
ENSG00000115825	PRKD3	2806	0.352409	0.0598845	1.04299e-07	2031.87	0.626171	0.055846	9.83818e-28	3675.77	-0.524915	0.15738	0.00273966	3701.35	-0.456173	0.164609	0.0130721	Conserved TNF	Conserved diff
ENSG00000115828	QPCT	25.7495	0.975488	0.399613	0.077582	81.612	2.22967	0.249508	7.29354e-18	142.266	0.241445	0.244931	0.463977	881.704	3.66737	0.241891	2.0784e-50	Gran-specific TNF	TPA-specific
ENSG00000163171	CDC42EP3	1603.82	0.267807	0.0669301	0.000822912	1075.99	0.654744	0.0687711	3.49939e-20	2006.69	-0.829589	0.109228	3.13471e-13	10314.5	2.8346	0.142386	2.60474e-86	Conserved TNF	Opposite diff
ENSG00000138061	CYP1B1	11249.4	-0.455142	0.0560309	2.15789e-14	16651.2	-1.34738	0.0524638	2.85991e-143	8412.53	1.22686	0.176351	3.00191e-11	17230.4	2.56757	0.178294	1.45627e-45	Conserved TNF	Conserved diff
ENSG00000232973	CYP1B1-AS1	169.44	-0.541167	0.166524	0.0102962	775.946	-1.63021	0.0841646	1.12625e-81	214.861	2.18647	0.224458	3.41568e-21	95.8599	0.596707	0.245442	0.0319367	Conserved TNF	Conserved diff
ENSG00000119787	ATL2	3189.51	0.164505	0.0638414	0.0584779	2055.99	-0.295966	0.0620128	1.16494e-05	4879.87	-0.17574	0.0931126	0.11822	4239.93	-0.602151	0.117301	1.26014e-06	Gran-specific TNF	TPA-specific
ENSG00000213553	RPLP0P6	436.017	0.0962433	0.1301	0.702814	426.554	0.100308	0.106911	0.526422	3017.39	-0.0936485	0.231584	0.790136	2212.5	-1.19759	0.258965	1.47211e-05	NA	TPA-specific
ENSG00000143889	HNRNPLL	2231.41	-0.100983	0.0682701	0.365703	15130.1	-0.794772	0.0576477	1.22965e-41	12892.6	1.75756	0.116665	1.29496e-49	6423.02	0.273859	0.135587	0.081518	Gran-specific TNF	ATRA-specific
ENSG00000143891	GALM	501.196	-0.292623	0.0995087	0.0241493	3551.3	-0.767472	0.048804	5.17135e-54	12843.5	2.50894	0.15518	4.72027e-57	4559.9	0.489125	0.193297	0.0249157	Conserved TNF	Conserved diff
ENSG00000115875	SRSF7	7111.07	0.09171	0.0616154	0.361829	4177.89	-0.00421728	0.0530234	0.964982	14083	-0.564797	0.17667	0.00428555	11427	-1.41236	0.191329	1.14774e-12	NA	Conserved diff
ENSG00000152147	GEMIN6	705.443	-0.0388349	0.0948091	0.839953	217.698	-0.0400278	0.134002	0.86431	1147.01	-1.48765	0.252468	2.5402e-08	1142.99	-1.44803	0.261438	1.48988e-07	NA	Conserved diff
ENSG00000163214	DHX57	1475.03	-0.0291299	0.0684259	0.833659	817.494	-0.187874	0.074485	0.0355217	1776.15	-0.266535	0.116715	0.0513755	1694.19	-0.380219	0.131731	0.00942775	Gran-specific TNF	TPA-specific
ENSG00000188010	MORN2	190.637	-0.199663	0.152428	0.440917	64.8135	-0.0870839	0.237097	0.830049	278.597	-1.32112	0.267283	3.96805e-06	268.027	-1.46891	0.278027	5.84167e-07	NA	Conserved diff
ENSG00000115904	SOS1	3532.9	-0.0719687	0.0663514	0.546428	3206.4	-0.166066	0.0544716	0.00858815	4616.8	0.302278	0.209366	0.253689	4146.04	0.0462248	0.211968	0.880814	Gran-specific TNF	NA
ENSG00000011566	MAP4K3	733.79	0.190101	0.0888683	0.138135	955.375	0.16509	0.0752614	0.0757831	872.682	0.485641	0.107664	2.9558e-05	1317.92	1.41768	0.12342	2.53021e-29	NA	Conserved diff
ENSG00000231312	AC007388.1	47.6865	0.0333654	0.298794	0.959895	42.033	-0.40997	0.294624	0.307046	138.55	-0.0862613	0.192141	0.765411	326.473	1.8597	0.20849	4.65515e-18	NA	TPA-specific
ENSG00000138050	THUMPD2	1209.97	0.152511	0.0859748	0.248916	854.834	-0.049792	0.075727	0.677767	1215.13	-0.534304	0.158925	0.00251349	1095.66	-0.883354	0.177063	2.60796e-06	NA	Conserved diff
ENSG00000183023	SLC8A1	438.941	-0.0384238	0.106744	0.862361	334.697	-0.13396	0.112384	0.39824	327.468	-0.372622	0.188064	0.0983652	1005.96	2.17436	0.202382	9.05084e-26	NA	TPA-specific
ENSG00000143924	EML4	2590.95	0.065456	0.0609839	0.551705	2968.63	0.0295394	0.0505282	0.717021	5747.74	1.1754	0.138851	3.24029e-16	6142.13	1.33759	0.152334	1.57405e-17	NA	Conserved diff
ENSG00000115944	COX7A2L	2690.52	0.0145674	0.074477	0.928701	1906.71	-0.0346054	0.0595313	0.718586	8833.23	-0.656162	0.248866	0.0216456	8889.41	-0.593411	0.268071	0.0533381	NA	ATRA-specific
ENSG00000152518	ZFP36L2	5109.97	-1.19544	0.065092	7.1036e-73	4982.44	-0.468304	0.0496456	7.97582e-20	22826.1	-0.176034	0.110429	0.199601	20761.1	-0.442623	0.143233	0.00513574	Conserved TNF	TPA-specific
ENSG00000279873	LINC01126	73.9673	0.288729	0.252672	0.519791	45.6292	1.33269	0.332673	0.000315715	54.2202	-0.558873	0.365796	0.222323	40.5523	-1.84702	0.428813	5.9772e-05	Gran-specific TNF	TPA-specific
ENSG00000115970	THADA	4332.3	0.0559621	0.0603074	0.619354	2027.56	-0.212434	0.0621939	0.00268899	2420.75	-0.684879	0.105908	7.74324e-10	2172.82	-1.0766	0.132214	3.30523e-15	Gran-specific TNF	Conserved diff
ENSG00000138036	DYNC2LI1	284.942	-0.0790742	0.125685	0.751423	221.16	-0.601029	0.137296	6.86035e-05	834.442	-0.831396	0.198802	0.000119398	791.231	-1.00666	0.214333	1.05268e-05	Gran-specific TNF	Conserved diff
ENSG00000138095	LRPPRC	20441.4	0.0908421	0.0511787	0.248551	6255.08	-0.129652	0.0450365	0.0140181	26447.8	-1.23474	0.139533	1.21566e-17	23821.7	-1.74166	0.159387	1.26891e-26	Gran-specific TNF	Conserved diff
ENSG00000138032	PPM1B	1795.32	0.0339413	0.0829291	0.840049	2252.37	-0.162868	0.060084	0.0221102	4129.23	0.268023	0.127733	0.0772132	4919.98	0.729239	0.158038	1.54218e-05	Gran-specific TNF	TPA-specific
ENSG00000138078	PREPL	2652.09	0.00490279	0.061514	0.972231	1196.45	-0.421544	0.0758265	2.20315e-07	2404.58	-0.668146	0.140585	9.83984e-06	2617.62	-0.328826	0.156304	0.0679854	Gran-specific TNF	ATRA-specific
ENSG00000143919	CAMKMT	585.464	-0.0356656	0.101209	0.865089	270.838	-0.401864	0.131863	0.00861631	598.403	-1.26771	0.208211	7.98796e-09	658.546	-0.798818	0.233731	0.00179283	Gran-specific TNF	Conserved diff
ENSG00000068784	SRBD1	1553.44	0.0100331	0.0748477	0.951173	1402.05	-0.528518	0.066818	3.76918e-14	2487.1	0.108178	0.14092	0.582346	1888.33	-0.745904	0.174009	6.52072e-05	Gran-specific TNF	TPA-specific
ENSG00000171132	PRKCE	374.433	0.247008	0.123646	0.175828	1380.72	0.946569	0.071067	6.8296e-39	627.668	1.82825	0.160026	7.68075e-29	327.539	0.493107	0.196223	0.0260187	Gran-specific TNF	Conserved diff
ENSG00000119729	RHOQ	1846.67	0.569643	0.0812257	8.34846e-11	3101.89	0.504368	0.0498425	1.01805e-22	3213.44	0.573076	0.0902403	1.61019e-09	3154.12	0.557353	0.133492	0.000104014	Conserved TNF	Conserved diff
ENSG00000151665	PIGF	831.716	0.0681034	0.0917848	0.701442	611.268	-0.234516	0.0915007	0.0322053	931.066	-0.172259	0.129838	0.300882	814.789	-0.573837	0.144521	0.000237433	Gran-specific TNF	TPA-specific
ENSG00000180398	MCFD2	5065.95	-0.0547011	0.0578225	0.612323	4381.28	-0.327804	0.0514535	1.90958e-09	13996.9	0.217384	0.133609	0.188687	13349.7	0.122149	0.1635	0.568373	Gran-specific TNF	NA
ENSG00000068724	TTC7A	1549.74	-0.103094	0.0727462	0.393338	937.876	0.0576514	0.0751673	0.619759	2969.05	-0.425251	0.0986929	7.03981e-05	3236.93	-0.111632	0.175823	0.632495	NA	ATRA-specific
ENSG00000143933	CALM2	10780.5	0.081067	0.0579192	0.400408	8566.98	-0.457029	0.0459549	5.78491e-22	24474.5	0.0204544	0.211673	0.952794	24714.3	0.0797217	0.235702	0.808261	Gran-specific TNF	NA
ENSG00000236824	BCYRN1	238.832	-0.304992	0.370232	0.664824	67.7803	1.38585	0.247924	1.87262e-07	12.4431	-1.14608	0.463732	0.0328371	11.1954	-1.65129	0.52207	0.00410001	Gran-specific TNF	Conserved diff
ENSG00000095002	MSH2	4672.55	0.0301122	0.0568946	0.792384	1657.31	-0.300052	0.0711677	0.000135598	6525.54	-0.926674	0.136486	9.30202e-11	5631.82	-1.58462	0.161123	9.58234e-22	Gran-specific TNF	Conserved diff
ENSG00000230979	AC079250.1	61.1985	0.0591495	0.307391	0.929615	51.5715	0.39496	0.270973	0.280126	226.264	-0.467259	0.317366	0.242732	183.725	-1.27734	0.344302	0.000637619	NA	TPA-specific
ENSG00000116062	MSH6	7692.78	-0.0350688	0.051	0.725653	2224.9	-0.297426	0.0554503	6.23713e-07	9429.15	-0.902985	0.120768	7.50318e-13	7326.24	-2.27181	0.138655	9.80189e-59	Gran-specific TNF	Conserved diff
ENSG00000138081	FBXO11	2051.46	0.0713106	0.0731439	0.597216	3245.56	0.134339	0.051242	0.0278418	2351.93	0.466646	0.11811	0.000300447	2560.01	0.701092	0.133577	6.99368e-07	Gran-specific TNF	Conserved diff
ENSG00000170802	FOXN2	3138.57	-0.0436965	0.0705477	0.756095	3605.01	-0.499528	0.0530928	1.00314e-19	5058.37	0.571587	0.209813	0.0171437	5167.05	0.654082	0.218973	0.00701594	Gran-specific TNF	Conserved diff
ENSG00000162869	PPP1R21	929.322	-0.0388293	0.0814975	0.813276	1419.29	-0.294658	0.0635866	2.21655e-05	2183.7	0.241173	0.102852	0.0445722	1974.01	-0.00508783	0.128163	0.979537	Gran-specific TNF	ATRA-specific
ENSG00000243244	STON1	41.3405	-0.010535	0.30786	0.988802	53.4894	-0.491375	0.275649	0.167793	59.0154	0.014403	0.26288	0.973492	74.2069	0.647417	0.247952	0.020205	NA	TPA-specific
ENSG00000143942	CHAC2	481.374	0.220996	0.118962	0.219147	134.01	0.247809	0.188501	0.340724	574.221	-1.77622	0.192496	4.13481e-19	520.425	-2.4422	0.213351	3.9792e-29	NA	Conserved diff
ENSG00000068912	ERLEC1	1608.83	0.0856296	0.0711164	0.491405	1159.72	-0.396116	0.0701504	1.37973e-07	3359.82	0.0256207	0.171581	0.925226	4182.72	0.6241	0.199861	0.00464913	Gran-specific TNF	TPA-specific
ENSG00000119737	GPR75	212.909	0.10982	0.140657	0.683247	206.374	0.399191	0.141739	0.0166433	108.08	0.163546	0.333515	0.740698	85.9107	-0.488977	0.374868	0.288311	Gran-specific TNF	NA
ENSG00000068878	PSME4	6912.27	0.150399	0.0588497	0.0611022	5066.23	0.224048	0.0446254	3.5553e-06	6145.91	-0.0588195	0.107614	0.708019	6143.43	-0.0227555	0.122496	0.89908	Gran-specific TNF	NA
ENSG00000115306	SPTBN1	6940	-0.258943	0.0507958	7.05816e-06	2694.06	-0.919107	0.0543897	2.72904e-62	9398.02	-0.623738	0.225945	0.0155544	9868.49	-0.405029	0.229061	0.13376	Conserved TNF	ATRA-specific
ENSG00000214595	EML6	25.8275	-0.273339	0.422984	0.745498	6.95486	-0.546993	0.74146	0.634853	82.6125	-2.26467	0.241216	9.34248e-20	86.6109	-1.80998	0.2443	9.42713e-13	NA	Conserved diff
ENSG00000115310	RTN4	5658.62	-0.0952357	0.0596504	0.316931	5470.43	0.0718778	0.0438224	0.212725	15801.1	0.270698	0.140912	0.110794	20607.2	0.935039	0.184029	1.64776e-06	NA	TPA-specific
ENSG00000162994	CLHC1	421.216	-0.00772036	0.117535	0.977912	765.804	-0.591768	0.0788909	8.35909e-13	562.314	0.337634	0.172349	0.102873	473.324	-0.10186	0.205628	0.714739	Gran-specific TNF	NA
ENSG00000203327	AC012358.1	46.6229	-0.190363	0.295527	0.746293	76.0312	-0.581699	0.224688	0.0302136	32.1182	0.372098	0.413679	0.509463	27.5748	0.0164264	0.507937	0.98374	Gran-specific TNF	NA
ENSG00000143947	RPS27A	26382.8	0.037758	0.0676857	0.780835	20495.5	0.141936	0.0556537	0.0332235	95361.8	-0.505681	0.311058	0.189141	78903.1	-1.23575	0.324202	0.000436346	Gran-specific TNF	TPA-specific
ENSG00000085760	MTIF2	3411.98	0.101133	0.0673686	0.356082	1388.92	-0.353168	0.0613418	7.42019e-08	4704.04	-0.979741	0.175213	1.38117e-07	4700.27	-0.934126	0.18883	3.20264e-06	Gran-specific TNF	Conserved diff
ENSG00000115355	CCDC88A	7581.81	0.187487	0.0693225	0.0436325	7276.99	0.210358	0.045146	1.97406e-05	10627.7	0.50023	0.218135	0.0501792	10407.4	0.481994	0.220466	0.0566736	Conserved TNF	NA
ENSG00000163001	CFAP36	770.825	0.125843	0.0868408	0.37896	366.764	0.0517677	0.104027	0.764262	1998.66	-1.09145	0.216708	2.51502e-06	2290.65	-0.508865	0.234961	0.059316	NA	ATRA-specific
ENSG00000275052	PPP4R3B	4872.46	0.146545	0.0532499	0.0388534	4915.82	-0.115001	0.0487406	0.0522007	7666.96	0.218595	0.115488	0.11698	7490.63	0.18952	0.142031	0.275445	Pro-specific TNF	NA
ENSG00000138035	PNPT1	4191.18	0.131035	0.0589904	0.119401	1280.75	0.156537	0.063449	0.0406688	4821.52	-0.082116	0.136995	0.679132	4030.49	-0.631134	0.130619	5.57779e-06	Gran-specific TNF	TPA-specific
ENSG00000028116	VRK2	991.333	0.20376	0.0880588	0.100446	1146.12	-0.127556	0.0681267	0.143003	975.26	0.507365	0.148721	0.00212819	879.509	0.276589	0.176194	0.189555	NA	ATRA-specific
ENSG00000115392	FANCL	1019.22	0.222638	0.0795743	0.0346649	691.747	-0.0323344	0.0874727	0.828886	1225.91	-0.294944	0.154446	0.113226	921.496	-1.39525	0.170371	2.27242e-15	Pro-specific TNF	TPA-specific
ENSG00000271955	AC007100.1	102.355	0.0811399	0.227129	0.86333	10.0247	-0.572913	0.604367	0.521311	8.94723	-2.66037	0.664111	0.00024188	7.901	-4.81384	1.11587	5.81135e-05	NA	Conserved diff
ENSG00000233891	AC007179.2	115.194	0.46955	0.231884	0.168215	6.83753	-0.277021	0.765827	0.833116	4.84422	-2.64431	0.859064	0.00619955	4.10806	-5.37835	1.25309	6.36835e-05	NA	Conserved diff
ENSG00000119866	BCL11A	2496.1	-0.36773	0.0647734	3.37598e-07	149.731	-1.51544	0.169236	6.20365e-18	1799.3	-2.67227	0.142265	8.68318e-77	1559.39	-6.07429	0.193189	2.47904e-214	Conserved TNF	Conserved diff
ENSG00000115421	PAPOLG	1285.67	0.0549256	0.0743971	0.703047	1251.14	-0.287045	0.0657432	7.20698e-05	1499.79	0.543317	0.12139	3.4385e-05	1536.46	0.632097	0.144884	4.71254e-05	Gran-specific TNF	Conserved diff
ENSG00000162924	REL	1909.94	0.874625	0.0723684	1.39643e-31	4990.35	0.530802	0.0471827	6.50628e-28	3510.81	1.978	0.544873	0.000996079	1996.47	0.8874	0.414296	0.0625362	Conserved TNF	ATRA-specific
ENSG00000237522	NONOP2	33.5194	-0.381522	0.350895	0.544761	46.7601	-0.792927	0.311033	0.0333057	187.614	1.1906	0.333989	0.00125537	135.063	0.486662	0.355331	0.261036	Gran-specific TNF	ATRA-specific
ENSG00000162927	PUS10	615.075	-0.01496	0.0965245	0.943985	614.857	-0.601728	0.0874044	6.64301e-11	998.368	0.463374	0.099587	1.55882e-05	913.983	0.26965	0.118758	0.0468039	Gran-specific TNF	Conserved diff
ENSG00000162928	PEX13	1014.53	0.00656531	0.0782763	0.970804	1176.45	-0.177087	0.0662266	0.0243682	1856.45	0.350754	0.104118	0.0024564	1758.56	0.240449	0.13833	0.141219	Gran-specific TNF	ATRA-specific
ENSG00000162929	KIAA1841	192.219	0.0980019	0.149111	0.740316	551.869	0.691938	0.105062	4.82297e-10	427.53	0.921466	0.122837	6.25624e-13	402.831	0.819097	0.131342	2.56005e-09	Gran-specific TNF	Conserved diff
ENSG00000237651	C2orf74	54.4408	0.024965	0.266389	0.968039	48.8287	-0.617537	0.286769	0.0822761	84.4206	-0.55058	0.221364	0.031585	80.7718	-0.674361	0.241102	0.0121621	NA	Conserved diff
ENSG00000173209	AHSA2	1728.4	0.140917	0.0787593	0.243919	2245.63	-0.152345	0.0554681	0.0201097	4113.55	0.241762	0.152389	0.202193	3340.87	-0.328891	0.211326	0.193864	Gran-specific TNF	NA
ENSG00000270820	AC016727.1	39.1137	0.12839	0.317078	0.841849	91.5899	-0.0985795	0.217491	0.78696	66.4913	0.710827	0.242925	0.00974232	66.752	0.757372	0.267072	0.0108924	NA	Conserved diff
ENSG00000082898	XPO1	16035.6	0.145601	0.0509329	0.0298569	10685.9	-0.149832	0.0534968	0.0173677	20945.6	-0.0839588	0.117119	0.611135	21724.5	0.0586103	0.127985	0.737301	Opposite TNF	NA
ENSG00000170264	FAM161A	407.287	-0.150094	0.112917	0.432112	77.8169	0.0743838	0.220971	0.844794	510.033	-1.68356	0.149044	3.28691e-28	409.618	-3.88978	0.195693	4.7834e-86	NA	Conserved diff
ENSG00000115484	CCT4	12394.9	0.0095438	0.0628216	0.945125	4324.9	-0.0449442	0.0503695	0.551076	19168	-1.0546	0.223267	1.12608e-05	20003.1	-0.82825	0.246326	0.00215602	NA	Conserved diff
ENSG00000170340	B3GNT2	1288.58	-0.0396719	0.0848166	0.817225	1805.01	-0.623476	0.0635329	2.08518e-21	3835.76	0.774709	0.166434	1.54671e-05	5080.41	1.3964	0.194846	5.39428e-12	Gran-specific TNF	Conserved diff
ENSG00000186889	TMEM17	26.9856	0.616207	0.455165	0.420585	3.02806	-0.470847	1.15964	0.810682	41.3367	-0.955282	0.262714	0.000975155	34.3001	-1.87778	0.324141	3.58567e-08	NA	Conserved diff
ENSG00000115504	EHBP1	1807.12	0.0664497	0.0699171	0.609744	1065.93	-0.153851	0.0669797	0.0602585	1593.89	-0.334894	0.122619	0.016853	1499.73	-0.498182	0.158801	0.00444735	NA	Conserved diff
ENSG00000115507	OTX1	175.574	-0.390923	0.165255	0.0907097	156.843	0.0556511	0.167895	0.847419	371.688	-0.294582	0.132768	0.0594197	278.185	-1.4099	0.170144	1.02915e-15	NA	TPA-specific
ENSG00000143951	WDPCP	477.363	-0.143309	0.122737	0.50749	286.483	-0.12284	0.13212	0.530626	276.46	-0.338691	0.129506	0.0228757	277.128	-0.290954	0.136468	0.0638896	NA	ATRA-specific
ENSG00000014641	MDH1	5214.19	0.0696106	0.0588225	0.500878	2750.42	-0.0895325	0.0572817	0.239255	14084.1	-0.696005	0.225413	0.00601948	15251.9	-0.375583	0.246578	0.204773	NA	ATRA-specific
ENSG00000169764	UGP2	3246.71	0.118293	0.0581073	0.165223	3838.44	0.223652	0.0527547	0.000122802	6398.16	0.3327	0.189621	0.151256	5760.99	0.0807202	0.212169	0.783335	Gran-specific TNF	NA
ENSG00000197329	PELI1	744.238	1.62488	0.0893417	1.75219e-71	712.342	1.18058	0.0855626	1.05588e-41	941.005	0.617202	0.127957	7.04749e-06	1154.58	1.10345	0.155895	1.00582e-11	Conserved TNF	Conserved diff
ENSG00000119862	LGALSL	94.1976	0.437016	0.229688	0.203923	98.2036	0.585633	0.224174	0.0284954	212.341	-0.209221	0.174721	0.357804	163.507	-1.14025	0.188198	7.54288e-09	Gran-specific TNF	TPA-specific
ENSG00000260101	AC008074.3	22.647	-0.653529	0.420408	0.333911	21.2788	0.355236	0.427598	0.583925	31.0087	0.223457	0.277207	0.561062	136.166	3.10884	0.23885	2.16404e-37	NA	TPA-specific
ENSG00000119844	AFTPH	2116.38	0.156665	0.0645837	0.0801461	2710.73	0.0875762	0.0567305	0.246386	4516.74	0.450852	0.131013	0.00192627	5710.33	1.02148	0.145454	1.47998e-11	NA	Conserved diff
ENSG00000179833	SERTAD2	1496.94	-0.249949	0.0703053	0.00398958	1499.32	-0.381383	0.0750359	2.62809e-06	4104.27	0.0626402	0.139135	0.764656	7201.28	1.39704	0.170238	1.9803e-15	Conserved TNF	TPA-specific
ENSG00000115902	SLC1A4	3003.51	0.235039	0.0660193	0.0039259	500.734	0.229258	0.0970039	0.0517582	5553.17	-1.20691	0.14376	5.76246e-16	18799.9	1.96799	0.168635	3.086e-30	Pro-specific TNF	Opposite diff
ENSG00000252892	RNU6-548P	32.0896	1.66976	0.387606	0.00024742	2.97992	-0.872579	1.14949	0.623951	4.18129	-1.81965	0.828577	0.0624465	5.83092	-0.282195	0.637247	0.746172	Pro-specific TNF	NA
ENSG00000011523	CEP68	783.946	-0.175061	0.0943211	0.21955	115.955	-0.499882	0.183677	0.0215169	1597.36	-1.29306	0.149949	8.51816e-17	2204.42	-0.0464058	0.174728	0.852307	Gran-specific TNF	ATRA-specific
ENSG00000138069	RAB1A	2854.4	0.124265	0.0589775	0.146666	2873.52	0.194258	0.0537952	0.00137611	7288.15	0.410798	0.179414	0.0506349	7617.41	0.548617	0.213389	0.0224616	Gran-specific TNF	TPA-specific
ENSG00000172974	AC007318.1	125.007	0.0881854	0.216207	0.840381	56.5866	-0.13108	0.287593	0.785652	863.341	-0.820864	0.259464	0.00475101	888.491	-0.668998	0.275577	0.0321995	NA	Conserved diff
ENSG00000138071	ACTR2	18301	0.0917021	0.0529228	0.263276	36359.7	0.0362374	0.0411953	0.557865	53003.5	1.26408	0.134734	9.91076e-20	54570.4	1.34831	0.165609	3.33877e-15	NA	Conserved diff
ENSG00000198369	SPRED2	1400.27	-0.129308	0.0841074	0.341674	1889.95	0.476671	0.0649365	2.71508e-12	3351.35	0.465416	0.187299	0.0317508	4509.01	1.1672	0.207888	9.79689e-08	Gran-specific TNF	Conserved diff
ENSG00000143971	ETAA1	649.341	0.0520984	0.101873	0.799971	473.309	-0.319987	0.100629	0.00574499	1003.33	-0.372376	0.102539	0.000991135	821.109	-1.0943	0.135751	6.36178e-15	Gran-specific TNF	Conserved diff
ENSG00000243667	WDR92	348.243	-0.232037	0.121729	0.202645	182.839	-0.107305	0.154238	0.657555	625.339	-1.04727	0.163402	1.11619e-09	687.127	-0.62209	0.171355	0.00085102	NA	Conserved diff
ENSG00000115946	PNO1	1968.8	0.101428	0.0716794	0.394216	637.339	0.063318	0.0839518	0.626348	1668.92	-1.20249	0.1575	2.32673e-13	1907.68	-0.601849	0.186624	0.00337517	NA	Conserved diff
ENSG00000115956	PLEK	7061.11	1.06239	0.0541185	2.88266e-83	29871	1.26938	0.0392444	4.17686e-227	55010.5	2.40675	0.129347	2.32917e-75	22293.7	0.664535	0.183754	0.000894046	Conserved TNF	Conserved diff
ENSG00000204923	FBXO48	215.55	0.851706	0.154448	8.14811e-07	85.3601	1.53249	0.225286	1.15122e-10	236.069	-0.819836	0.182886	3.33465e-05	344.511	0.39529	0.164933	0.0347166	Conserved TNF	Opposite diff
ENSG00000169621	APLF	190.537	1.23848	0.155436	7.41546e-14	134.152	2.05607	0.202665	7.85882e-23	193.488	-1.31931	0.193209	7.16829e-11	298.259	0.245788	0.183321	0.272761	Conserved TNF	ATRA-specific
ENSG00000163219	ARHGAP25	584.426	-0.937545	0.0943234	1.92947e-21	2558.01	0.0605377	0.0625547	0.510985	4753.94	1.1602	0.136292	2.17788e-16	8248.89	2.22644	0.183979	1.92488e-32	Pro-specific TNF	Conserved diff
ENSG00000198380	GFPT1	2605.08	0.0546448	0.0627662	0.645285	2428.05	0.413029	0.0602359	7.97268e-11	3320.52	-0.0557637	0.111148	0.733647	3623.49	0.224611	0.122708	0.119001	Gran-specific TNF	NA
ENSG00000115977	AAK1	1357.71	-0.229336	0.0737481	0.0151398	2116.11	0.272604	0.0607201	4.2186e-05	2220.2	0.0519475	0.192454	0.864236	5105.67	1.90573	0.196613	3.77869e-21	Opposite TNF	TPA-specific
ENSG00000196975	ANXA4	359.089	0.0691122	0.119876	0.772816	1084.81	0.0594147	0.0706661	0.578741	2060.58	0.570444	0.159271	0.00118439	2811.33	1.28087	0.193888	2.43826e-10	NA	Conserved diff
ENSG00000087338	GMCL1	2462.32	-0.166526	0.0691579	0.0831163	1294.74	-0.751021	0.0866048	7.37222e-17	4057.7	-0.380881	0.128021	0.0084358	4445.54	-0.0567859	0.155128	0.791914	Gran-specific TNF	ATRA-specific
ENSG00000059728	MXD1	1098.72	0.0995444	0.0750153	0.432713	1354.37	0.215714	0.0629195	0.00257709	2136.02	0.271992	0.148222	0.130595	3148.03	1.19924	0.161515	8.3697e-13	Gran-specific TNF	TPA-specific
ENSG00000179818	PCBP1-AS1	1606.62	-0.017362	0.0731868	0.911485	1576.53	-0.128779	0.0609977	0.089926	2400.06	-0.440617	0.101232	5.85591e-05	1977.48	-1.15379	0.131345	1.52396e-17	NA	Conserved diff
ENSG00000116001	TIA1	2671.3	0.0518781	0.069621	0.699983	3823.29	-0.419067	0.0706709	2.74552e-08	8256	0.685316	0.0989517	3.71964e-11	6021.71	-0.109075	0.13848	0.545093	Gran-specific TNF	ATRA-specific
ENSG00000116005	PCYOX1	445.24	-0.561571	0.108886	5.20914e-06	473.815	-0.89238	0.107706	1.88509e-15	2092.55	0.236652	0.185843	0.323389	1958.98	0.0920005	0.198995	0.734638	Conserved TNF	NA
ENSG00000143977	SNRPG	3471.86	-0.0652188	0.193205	0.871255	1642.3	0.30622	0.0615103	4.37072e-06	4948.97	-0.782432	0.241359	0.00371111	4330.16	-1.32643	0.25609	9.97732e-07	Gran-specific TNF	Conserved diff
ENSG00000035141	FAM136A	3342.64	-0.0483531	0.0676236	0.714127	1086.35	-0.0834578	0.0704748	0.401892	4655.71	-1.09472	0.181076	1.03251e-08	4503.37	-1.19598	0.199183	1.04348e-08	NA	Conserved diff
ENSG00000163235	TGFA	23.1672	-0.873693	0.413643	0.145398	87.261	-1.56701	0.220729	1.499e-11	154.887	-0.372979	0.166403	0.0565752	236.464	0.79662	0.167793	8.31553e-06	Gran-specific TNF	TPA-specific
ENSG00000075340	ADD2	1170.08	-0.126297	0.0775326	0.302997	207.294	-0.347913	0.143003	0.0440511	3347.47	-0.941156	0.17736	6.37156e-07	3893.06	-0.336939	0.159929	0.0675498	Gran-specific TNF	ATRA-specific
ENSG00000144043	TEX261	2408.15	-0.0646992	0.0626064	0.571177	1710.63	0.186613	0.061746	0.00928441	5573.31	-0.168002	0.13603	0.34021	5995.98	0.083593	0.170532	0.717917	Gran-specific TNF	NA
ENSG00000124357	NAGK	868.762	0.261364	0.0839889	0.0150644	2871.78	0.536791	0.0559748	1.81102e-20	6656.62	2.12212	0.123205	1.13884e-64	6315.2	2.05006	0.13629	1.24325e-49	Conserved TNF	Conserved diff
ENSG00000124370	MCEE	379.327	0.0922207	0.112529	0.667005	195.118	-0.45904	0.145116	0.00604224	622.511	-0.714868	0.161339	4.17929e-05	526.066	-1.41311	0.180838	4.41725e-14	Gran-specific TNF	Conserved diff
ENSG00000124383	MPHOSPH10	2599	0.231406	0.0614557	0.00193648	1231.69	0.181549	0.0733581	0.0399198	3454.58	-0.495352	0.1542	0.00407752	3492.06	-0.418392	0.181592	0.043274	Conserved TNF	Conserved diff
ENSG00000124374	PAIP2B	48.2557	-0.59748	0.289238	0.157347	27.2151	-1.01731	0.385048	0.0264262	314.547	-0.659938	0.145972	2.82249e-05	255.496	-1.54393	0.170634	1.49416e-18	Gran-specific TNF	Conserved diff
ENSG00000075292	ZNF638	7141.09	0.165699	0.0558557	0.0225408	8497.45	-0.0661235	0.0461339	0.289926	9515.21	0.416627	0.11073	0.000611926	9089.6	0.331316	0.12017	0.0135902	Pro-specific TNF	Conserved diff
ENSG00000144040	SFXN5	840.614	-0.193083	0.0991868	0.190408	2554.17	-0.401551	0.0551774	4.26855e-12	2530.91	1.85901	0.0838615	9.5548e-107	1762.79	1.17741	0.137261	9.01752e-17	Gran-specific TNF	Conserved diff
ENSG00000135632	SMYD5	1397.04	-0.105647	0.0797635	0.43341	658.364	0.232133	0.084591	0.0202224	2028.75	-0.580255	0.120251	6.99188e-06	1919.48	-0.74142	0.178214	0.000110629	Gran-specific TNF	Conserved diff
ENSG00000135617	PRADC1	608.13	-0.133771	0.117105	0.519977	585.806	-0.552041	0.087954	3.40672e-09	1679.52	0.257967	0.211753	0.348048	1894.08	0.588569	0.248969	0.0375923	Gran-specific TNF	TPA-specific
ENSG00000135624	CCT7	12132.7	-0.0378643	0.053748	0.718638	4312.22	-0.00927695	0.0478125	0.915324	22130.5	-0.90497	0.207449	5.62208e-05	23446.2	-0.635766	0.242024	0.01939	NA	Conserved diff
ENSG00000163013	FBXO41	2743.61	-0.114489	0.0691201	0.292074	1866.06	0.161365	0.064005	0.0356181	6810.53	-0.362942	0.173143	0.0775616	6560.6	-0.443193	0.182529	0.0321677	Gran-specific TNF	TPA-specific
ENSG00000214484	RPSAP28	30.1488	0.646362	0.387859	0.287989	50.0187	0.610864	0.284514	0.083286	7.94823	-0.335754	0.582739	0.691729	5.60431	-1.83774	0.749595	0.0303385	NA	TPA-specific
ENSG00000116127	ALMS1	5890.52	0.211937	0.0603585	0.0045678	4293.62	0.151482	0.045185	0.00331973	3640.04	-0.073134	0.251101	0.851757	3601.29	-0.0640091	0.249092	0.857704	Conserved TNF	NA
ENSG00000230002	ALMS1-IT1	119.529	0.180056	0.190526	0.612717	113.434	0.462778	0.181701	0.0334876	19.6898	0.0917501	0.349782	0.867869	21.1956	0.340817	0.423078	0.535154	Gran-specific TNF	NA
ENSG00000144034	TPRKB	1292.79	0.108502	0.0736394	0.368284	675.003	-0.0552831	0.0826352	0.672074	2226.37	-0.634292	0.23549	0.0185996	1952.64	-1.1272	0.257266	4.34783e-05	NA	Conserved diff
ENSG00000144048	DUSP11	986.304	0.0799993	0.0776709	0.573017	713.757	-0.0257087	0.0806758	0.853633	1572.73	-0.505949	0.195994	0.02497	1845.11	0.0313781	0.218397	0.921958	NA	ATRA-specific
ENSG00000124356	STAMBP	1301.82	-0.032743	0.0720225	0.823144	1042.38	-0.4095	0.075402	4.37607e-07	2687.18	-0.283191	0.114424	0.0325575	2863.29	-0.0519098	0.140509	0.790046	Gran-specific TNF	ATRA-specific
ENSG00000187605	TET3	5821.9	0.230158	0.0722928	0.0123705	7011.85	0.0936019	0.0577948	0.219299	10868.5	0.54076	0.248132	0.064828	8145.05	-0.208797	0.254862	0.527219	Pro-specific TNF	NA
ENSG00000257800	FNBP1P1	121.948	0.12219	0.189413	0.745883	107.193	-0.0267389	0.21109	0.945162	159.978	0.37461	0.357104	0.431386	97.2193	-1.25707	0.38868	0.00327846	NA	TPA-specific
ENSG00000163170	BOLA3	1166.49	-0.14105	0.0866061	0.303133	379.997	0.223869	0.107077	0.0936788	1317.85	-1.09205	0.23494	1.5933e-05	1378.48	-0.853491	0.25614	0.00238398	NA	Conserved diff
ENSG00000114978	MOB1A	7673.9	0.136176	0.053596	0.0631886	13995.8	0.0431701	0.0433073	0.496022	18608.8	0.976727	0.142325	5.69786e-11	19656.9	1.12132	0.165497	7.97969e-11	NA	Conserved diff
ENSG00000065911	MTHFD2	10183.3	0.420976	0.0549095	7.50931e-13	5810.62	1.32136	0.045454	1.79913e-183	18489.2	-0.815751	0.198781	0.000164418	21165.1	-0.292714	0.192235	0.204857	Conserved TNF	ATRA-specific
ENSG00000005448	WDR54	85.2159	-0.289318	0.217074	0.43056	35.7509	-0.353397	0.338578	0.472654	472.084	-0.977914	0.27337	0.00120168	358.743	-2.66521	0.297079	2.96675e-18	NA	Conserved diff
ENSG00000239779	WBP1	86.85	0.11013	0.241077	0.822476	113.266	-0.0845013	0.201749	0.804829	400.152	0.260912	0.127911	0.0872187	415.955	0.394557	0.139745	0.0112873	NA	TPA-specific
ENSG00000115275	MOGS	1960.92	-0.122632	0.0912548	0.424764	1172.96	0.135447	0.0700267	0.127724	6302.57	-0.281129	0.0984403	0.0119098	6806.45	-0.0103707	0.137879	0.958929	NA	ATRA-specific
ENSG00000135637	CCDC142	473.411	-0.0532172	0.105428	0.801573	522.444	0.235315	0.092642	0.0340413	912.877	0.502658	0.152672	0.0031551	862.867	0.395823	0.172378	0.0440622	Gran-specific TNF	Conserved diff
ENSG00000115282	TTC31	803.385	0.0599639	0.0856794	0.720538	826.64	-0.108101	0.0760486	0.294449	3015.71	0.352721	0.0834083	9.84409e-05	2629.14	0.015255	0.109254	0.924311	NA	ATRA-specific
ENSG00000115307	AUP1	5004.62	0.0572161	0.0558946	0.575939	2853.47	0.324426	0.0532173	1.01647e-08	10767.9	-0.625939	0.14081	3.92622e-05	10206.7	-0.784256	0.167047	1.06225e-05	Gran-specific TNF	Conserved diff
ENSG00000115317	HTRA2	1379.33	0.0829037	0.0921776	0.633202	638.6	0.618354	0.0864025	1.0075e-11	2238.56	-1.02284	0.177836	5.67368e-08	2284.4	-0.888297	0.211595	9.46078e-05	Gran-specific TNF	Conserved diff
ENSG00000115318	LOXL3	51.3458	0.360176	0.286348	0.466369	567.476	0.00547078	0.0864574	0.971793	1184.86	2.55819	0.113183	5.89848e-111	926.881	2.15681	0.120552	7.24401e-70	NA	Conserved diff
ENSG00000115325	DOK1	976.87	-0.0954772	0.0803732	0.499044	1914.99	0.107785	0.0610166	0.172497	3825.5	0.68861	0.238088	0.0107356	3856.21	0.732515	0.263681	0.0128248	NA	Conserved diff
ENSG00000159374	M1AP	32.8752	-0.512744	0.344187	0.361197	30.3969	-1.45004	0.372426	0.000488995	294.728	0.079273	0.138618	0.694157	247.378	-0.423556	0.164923	0.0226286	Gran-specific TNF	TPA-specific
ENSG00000272711	AC019069.1	152.24	-0.357481	0.177529	0.171424	42.0333	-0.541035	0.322459	0.200384	367.529	-2.41538	0.236523	3.31216e-23	373.413	-2.18647	0.251709	3.55597e-17	NA	Conserved diff
ENSG00000159399	HK2	6931.44	-0.0542299	0.0611653	0.638925	1878.8	-0.559086	0.0651671	1.62878e-16	8974.59	-0.960455	0.148253	7.17763e-10	10447.3	-0.349225	0.179294	0.0944591	Gran-specific TNF	ATRA-specific
ENSG00000115350	POLE4	852.461	-0.0798665	0.0927294	0.649519	609.158	0.238221	0.0832644	0.01471	1999.49	-0.70886	0.269765	0.0221451	1781.49	-1.14802	0.290522	0.000255441	Gran-specific TNF	Conserved diff
ENSG00000115364	MRPL19	2780.78	0.034054	0.0643465	0.792384	1184.45	-0.135026	0.0693337	0.124557	3161.18	-0.731908	0.14182	1.34756e-06	3039.04	-0.83966	0.172197	4.51494e-06	NA	Conserved diff
ENSG00000005436	GCFC2	958.972	0.111327	0.0858789	0.446794	352.458	-0.230905	0.113495	0.104866	933.034	-0.772439	0.116084	2.28845e-10	922.834	-0.767329	0.128037	1.11799e-08	NA	Conserved diff
ENSG00000270696	AC005034.3	465.006	0.106755	0.123267	0.647112	257.925	-0.087798	0.131484	0.672555	462.141	-0.457489	0.131912	0.00175918	418.714	-0.773754	0.14018	1.65332e-07	NA	Conserved diff
ENSG00000200488	RN7SKP203	847.737	-0.282672	0.586782	0.810946	1171.01	1.02685	0.236218	7.82126e-05	7.93154	-0.42382	0.730279	0.689463	8.91654	-0.0046781	0.740887	0.996475	Gran-specific TNF	NA
ENSG00000163541	SUCLG1	2442.58	0.0448029	0.0686116	0.74189	1487.13	-0.0727944	0.0627523	0.412949	5535.05	-0.436188	0.198384	0.0620834	4951.92	-0.802197	0.221724	0.00088938	NA	TPA-specific
ENSG00000034510	TMSB10	8105.45	-0.103125	0.0737341	0.400845	26871.8	0.321321	0.0451837	1.37989e-11	35021.6	1.06426	0.309011	0.00190839	46062.9	1.63569	0.327511	2.53957e-06	Gran-specific TNF	Conserved diff
ENSG00000176407	KCMF1	1612.41	0.069177	0.0734869	0.614244	1367.32	0.378065	0.0691228	3.5698e-07	3113.71	-0.281912	0.169383	0.177376	3902.37	0.390206	0.201859	0.0973458	Gran-specific TNF	NA
ENSG00000152291	TGOLN2	7643.51	0.189645	0.0579918	0.00966488	12597.3	0.0640981	0.0467245	0.315543	25370	0.926718	0.161056	5.59716e-08	34591.9	1.58851	0.181955	2.43701e-17	Pro-specific TNF	Conserved diff
ENSG00000042445	RETSAT	656.161	-0.0562516	0.0981248	0.774025	451.122	-0.374586	0.101719	0.00106832	2383.54	-0.128262	0.101905	0.329661	3472.64	0.867349	0.146109	1.56083e-08	Gran-specific TNF	TPA-specific
ENSG00000115459	ELMOD3	546.602	0.0962805	0.10832	0.63762	629.28	-0.0220739	0.091548	0.891707	1242.14	0.408184	0.0920223	4.09184e-05	1308.86	0.569704	0.11756	5.21343e-06	NA	Conserved diff
ENSG00000042493	CAPG	361.914	-0.299151	0.117659	0.0629876	1396.84	-0.0875757	0.0665495	0.340098	3312.83	0.73619	0.256962	0.0116055	16071	3.59367	0.289057	3.44371e-34	NA	Conserved diff
ENSG00000168906	MAT2A	16072.6	0.170214	0.0538949	0.0133161	9473.03	-0.0757121	0.0400822	0.13868	28790.6	-0.367455	0.130447	0.0132754	25328.8	-0.780096	0.142311	2.03174e-07	Pro-specific TNF	Conserved diff
ENSG00000115486	GGCX	719.506	0.0198986	0.0862983	0.914492	745.928	0.134483	0.0871306	0.246488	1524.77	0.466338	0.115837	0.000223751	1526.78	0.499482	0.1332	0.00055044	NA	Conserved diff
ENSG00000118640	VAMP8	5266.64	-0.0626361	0.0675007	0.619354	6089.47	-0.179461	0.0462039	0.000506647	20195	-0.00859179	0.283439	0.985949	13955.2	-1.34954	0.304282	3.45113e-05	Gran-specific TNF	TPA-specific
ENSG00000168883	USP39	3033.52	0.0802178	0.061187	0.440577	1539	-0.115196	0.0659238	0.178276	5267.3	-0.491517	0.139394	0.0014386	4958.9	-0.666021	0.174307	0.000421397	NA	Conserved diff
ENSG00000168887	C2orf68	707.857	-0.0782241	0.0869547	0.633154	671.653	-0.287459	0.0847386	0.00291078	2351	-0.0628119	0.080624	0.576095	1876.47	-0.781721	0.104076	4.42369e-13	Gran-specific TNF	TPA-specific
ENSG00000115525	ST3GAL5	47.3086	-0.0882122	0.302074	0.889747	214.555	0.482691	0.143389	0.00317016	585.412	0.462789	0.178605	0.0243477	4261.47	4.04671	0.183515	9.95163e-106	Gran-specific TNF	Conserved diff
ENSG00000068654	POLR1A	8697.42	-0.0966922	0.0624629	0.336714	3138.86	-0.0666433	0.0583172	0.421822	7559.94	-0.801162	0.236595	0.00231968	7528.42	-0.763774	0.241334	0.00407625	NA	Conserved diff
ENSG00000132300	PTCD3	5266.54	0.0258208	0.0551915	0.817225	2906.17	-0.113484	0.0507444	0.0691878	7087.32	-0.586176	0.0991776	2.28806e-08	6237.53	-1.04575	0.122548	1.31453e-16	NA	Conserved diff
ENSG00000208772	SNORD94	77.3855	0.345265	0.252685	0.414521	47.653	0.019449	0.291004	0.970539	38.1845	-0.641594	0.26093	0.0338718	34.2078	-1.01414	0.318775	0.00386926	NA	Conserved diff
ENSG00000132305	IMMT	5785.47	-0.00765158	0.055098	0.94969	2843.27	-0.126453	0.0512599	0.0406822	11683	-0.79983	0.185256	6.79246e-05	11556.1	-0.797823	0.211356	0.000501236	Gran-specific TNF	Conserved diff
ENSG00000273080	AC009309.1	22.0977	-0.489547	0.41447	0.501694	12.2847	-0.809682	0.558313	0.282849	18.752	-1.16076	0.371824	0.00541391	16.245	-1.9664	0.48194	0.000153567	NA	Conserved diff
ENSG00000132313	MRPL35	2109.68	0.0650847	0.0683718	0.60917	1154.75	-0.18317	0.065883	0.0183584	3424.43	-0.469899	0.179991	0.0231467	3338.73	-0.518349	0.205227	0.0252034	Gran-specific TNF	Conserved diff
ENSG00000115548	KDM3A	2255.68	-0.282885	0.068332	0.000484679	1688.29	-0.53282	0.06328	6.20593e-16	4796.43	0.132402	0.119421	0.400972	6230.98	0.813873	0.142729	6.01274e-08	Conserved TNF	TPA-specific
ENSG00000115561	CHMP3	938.555	0.108237	0.083122	0.444266	1661.57	0.118021	0.0614071	0.130721	2382.08	0.743662	0.117306	1.72521e-09	2240.47	0.628712	0.149358	9.02524e-05	NA	Conserved diff
ENSG00000239305	RNF103	414.193	0.126307	0.106376	0.499298	433.805	-0.334824	0.101349	0.00388743	811.019	0.0465237	0.0998654	0.755411	1214.38	1.05708	0.120417	1.60338e-17	Gran-specific TNF	TPA-specific
ENSG00000153561	RMND5A	4527.24	0.0381337	0.0603142	0.750192	2433.41	-0.433054	0.0541583	1.91785e-14	6366.74	-0.170587	0.12303	0.275942	7109.72	0.183064	0.153008	0.334538	Gran-specific TNF	NA
ENSG00000187627	RGPD1	98.6264	0.201627	0.205227	0.593474	202.508	0.305579	0.158366	0.128858	476.318	1.37081	0.19222	8.99072e-12	344.499	0.706006	0.2094	0.00209377	NA	Conserved diff
ENSG00000183281	PLGLB1	134.084	-0.118525	0.178791	0.737928	118.965	-0.888191	0.187433	1.36545e-05	171.187	-0.0742483	0.191817	0.799152	147.982	-0.501046	0.229994	0.0576541	Gran-specific TNF	NA
ENSG00000231259	AC125232.1	304.243	-0.00342487	0.12989	0.991729	219.862	-0.434526	0.145122	0.0100605	537.46	-0.488009	0.114172	8.13947e-05	557.873	-0.322909	0.132868	0.0320064	Gran-specific TNF	Conserved diff
ENSG00000204745	AC083899.1	362.181	0.0446822	0.122381	0.859965	174.161	-0.0889582	0.159357	0.73137	954.329	-0.835955	0.113507	1.71051e-12	889.283	-1.08434	0.137617	2.66517e-14	NA	Conserved diff
ENSG00000222041	CYTOR	677.449	0.126173	0.0945436	0.429636	1148.72	0.237931	0.0702018	0.00293991	951.125	-0.0194129	0.263506	0.964216	687.91	-1.14624	0.289747	0.000251228	Gran-specific TNF	TPA-specific
ENSG00000234231	AC093616.1	371.671	-0.0920128	0.115511	0.676359	401.063	-0.322756	0.107163	0.00956893	945.687	-0.237494	0.139199	0.16485	800.967	-0.770879	0.158656	4.90554e-06	Gran-specific TNF	TPA-specific
ENSG00000125551	PLGLB2	145.991	-0.0602816	0.191183	0.880412	163.007	-0.917212	0.163961	1.83004e-07	110.014	-0.172404	0.175496	0.465776	102.759	-0.338501	0.244977	0.25624	Gran-specific TNF	NA
ENSG00000185304	RGPD2	470.211	0.61286	0.117453	3.88624e-06	1095.44	0.240165	0.070533	0.00279024	1093.67	1.30345	0.164383	2.44508e-14	811.928	0.686524	0.171924	0.000217093	Conserved TNF	Conserved diff
ENSG00000172086	KRCC1	83.0574	0.0790764	0.22808	0.86706	713.887	-0.454083	0.0903527	3.46796e-06	1362.46	1.68987	0.196538	1.05697e-16	1357.93	1.7045	0.222804	1.55288e-13	Gran-specific TNF	Conserved diff
ENSG00000172071	EIF2AK3	832.621	0.0843197	0.0896255	0.614415	748.197	0.2196	0.0812138	0.0224985	1068.17	0.247764	0.135409	0.131862	1228.81	0.630336	0.167466	0.000522454	Gran-specific TNF	TPA-specific
ENSG00000234028	AC062029.1	30.0569	-0.217896	0.37296	0.768857	21.0628	-0.427631	0.436258	0.50461	74.9857	-0.116706	0.211542	0.705419	46.7804	-2.24106	0.302791	9.94826e-13	NA	TPA-specific
ENSG00000153574	RPIA	1902.54	0.0381805	0.0667689	0.774824	2231.93	1.37784	0.0656074	6.1575e-96	4824.98	0.0377447	0.215357	0.912138	3280.53	-1.34687	0.243959	1.64336e-07	Gran-specific TNF	TPA-specific
ENSG00000144029	MRPS5	2368.33	0.0667416	0.0669095	0.587193	1212.77	0.0694281	0.0662921	0.470833	3642.17	-0.800843	0.165645	6.68407e-06	3679.66	-0.71618	0.188305	0.000450303	NA	Conserved diff
ENSG00000144026	ZNF514	57.4179	-0.518697	0.278316	0.21725	58.1828	-1.00523	0.274121	0.00112896	148.595	-0.2466	0.15833	0.212081	133.897	-0.545741	0.180521	0.0063002	Gran-specific TNF	TPA-specific
ENSG00000275111	ZNF2	244.489	-0.190168	0.156422	0.486721	213.483	-0.422268	0.159218	0.0257642	414.824	-0.077746	0.149856	0.724124	418.669	-0.0169379	0.184782	0.950251	Gran-specific TNF	NA
ENSG00000115042	FAHD2A	1084.44	0.174554	0.0760202	0.103693	553.128	-0.0933176	0.0923245	0.488647	1978.36	-0.983539	0.168775	3.68424e-08	1796.97	-1.38272	0.187995	1.3926e-12	NA	Conserved diff
ENSG00000232931	LINC00342	685.583	0.300681	0.107241	0.0341662	420.783	0.367471	0.102779	0.00156053	1466.42	-0.787479	0.274539	0.0114917	1372.71	-1.00215	0.357116	0.0118485	Conserved TNF	Conserved diff
ENSG00000174501	ANKRD36C	4586.68	0.232999	0.0819272	0.0308947	2509.78	0.208983	0.0556393	0.000816912	1253.14	-0.36688	0.575138	0.657203	1053.05	-0.956153	0.660862	0.231616	Conserved TNF	NA
ENSG00000231584	FAHD2CP	219.648	0.124089	0.14485	0.65125	108.302	0.182101	0.190211	0.516352	286.367	-1.40302	0.162352	7.28615e-17	327.131	-0.751899	0.170344	3.78056e-05	NA	Conserved diff
ENSG00000188886	ASTL	31.113	0.299077	0.399022	0.697674	23.6149	5.66578	0.905504	3.8361e-09	7.13505	-1.04358	0.697784	0.234096	59.1115	3.51759	0.316301	1.51551e-27	Gran-specific TNF	TPA-specific
ENSG00000158050	DUSP2	593.756	0.801212	0.103781	4.98972e-13	461.377	3.69155	0.136013	5.97851e-160	732.117	-1.79775	0.184313	3.02345e-21	4589.18	2.84174	0.234934	2.06018e-32	Conserved TNF	Opposite diff
ENSG00000084090	STARD7	11419.5	0.355014	0.0587013	3.99226e-08	5387.71	0.148713	0.0453431	0.00420149	14001.7	-0.61859	0.140646	4.81247e-05	14090.8	-0.552874	0.176298	0.0044636	Conserved TNF	Conserved diff
ENSG00000204685	STARD7-AS1	128.925	0.337391	0.183022	0.223832	129.956	-0.183757	0.18877	0.507848	329.891	-0.351935	0.120858	0.0101368	296.14	-0.687944	0.139373	3.379e-06	NA	Conserved diff
ENSG00000135956	TMEM127	1803.45	0.354572	0.0652915	1.28086e-06	3339.74	0.176416	0.0608771	0.0132952	5558.18	1.33761	0.127602	2.054e-24	8551.39	2.16845	0.174599	4.02161e-34	Conserved TNF	Conserved diff
ENSG00000144021	CIAO1	3142.57	0.125364	0.0635819	0.18268	2259.99	0.128862	0.0548383	0.053372	6903.78	-0.261928	0.0909209	0.0110821	9121.64	0.539761	0.126586	7.1811e-05	NA	Opposite diff
ENSG00000121152	NCAPH	3064.46	-0.0334461	0.0605501	0.783369	1300.54	-0.150621	0.0736636	0.102774	4183.12	-0.583201	0.132973	5.07609e-05	2788.14	-2.99768	0.190144	1.95455e-54	NA	Conserved diff
ENSG00000196843	ARID5A	688.606	0.0206247	0.0930095	0.919282	1244.26	-0.188306	0.0703624	0.0242252	2991.42	0.939811	0.150362	2.98568e-09	3506.16	1.29898	0.185717	1.8011e-11	Gran-specific TNF	Conserved diff
ENSG00000114982	KANSL3	2446.82	-0.0611985	0.0648752	0.613249	4254.06	0.0344942	0.0472066	0.638849	7613.85	0.778972	0.100081	7.51502e-14	4842.91	-0.41636	0.135619	0.00546201	NA	Opposite diff
ENSG00000158158	CNNM4	273.916	-0.493404	0.144333	0.00616563	454.831	-0.190238	0.0975994	0.124184	1021.88	0.82219	0.130141	1.97686e-09	1423.03	1.5382	0.172713	5.25682e-18	Pro-specific TNF	Conserved diff
ENSG00000168763	CNNM3	900.33	-0.258754	0.100079	0.0573195	352.989	-0.378484	0.111817	0.00298443	1493.44	-0.541978	0.173983	0.00552585	1432.14	-0.645775	0.185454	0.00143969	Gran-specific TNF	Conserved diff
ENSG00000168758	SEMA4C	99.8815	0.123296	0.202979	0.761151	579.764	-0.461546	0.0864451	7.08905e-07	1596.34	3.21528	0.0973003	9.53529e-237	902.832	2.29181	0.145978	5.43669e-54	Gran-specific TNF	Conserved diff
ENSG00000144199	FAHD2B	175.386	0.0231741	0.166436	0.949546	45.3214	0.0958062	0.308559	0.858174	639.736	-1.50839	0.231748	5.91063e-10	552.179	-2.48095	0.25959	1.37961e-20	NA	Conserved diff
ENSG00000135976	ANKRD36	5087.08	0.160261	0.0766834	0.150848	3181.3	0.223265	0.0590493	0.000744358	1501.59	-0.245053	0.324738	0.589652	1396.99	-0.431992	0.385802	0.370365	Gran-specific TNF	NA
ENSG00000277701	AC159540.2	169.773	0.387643	0.186413	0.153524	157.673	0.209977	0.157599	0.333052	1108.16	-0.637068	0.271103	0.0440425	1248.69	-0.189126	0.367715	0.703467	NA	ATRA-specific
ENSG00000230606	AC092683.1	1650.28	0.353044	0.101953	0.00533897	1415.78	0.408906	0.0764719	6.80346e-07	1340.14	-0.396605	0.338666	0.370661	1461.56	-0.0775736	0.403732	0.895487	Conserved TNF	NA
ENSG00000196912	ANKRD36B	2409.72	0.111437	0.079601	0.400333	1645.41	0.329339	0.0637363	1.71715e-06	898.751	-0.238033	0.280666	0.538201	902.798	-0.178291	0.347151	0.703797	Gran-specific TNF	NA
ENSG00000115073	ACTR1B	813.949	0.14134	0.0900484	0.327845	1055.23	0.238995	0.0687217	0.00218405	4465.71	0.167577	0.101804	0.182871	5291.93	0.629081	0.156243	0.000190408	Gran-specific TNF	TPA-specific
ENSG00000228486	C2orf92	116.961	0.0736237	0.193624	0.852932	226.687	0.268717	0.130776	0.100717	264.828	0.511967	0.266112	0.110148	422.422	1.54983	0.328167	9.3346e-06	NA	TPA-specific
ENSG00000075568	TMEM131	3716.82	0.0348365	0.0764098	0.822933	5427.25	-0.12326	0.0529451	0.056148	8633.9	0.868432	0.198173	5.15957e-05	7414.43	0.54505	0.205888	0.0183487	NA	Conserved diff
ENSG00000235734	HMGN1P36	161.969	-0.299347	0.166095	0.239198	121.519	-0.12623	0.194439	0.682107	495.073	-0.154841	0.201447	0.581719	372.444	-1.17392	0.234848	2.4852e-06	NA	TPA-specific
ENSG00000040933	INPP4A	2079.34	-0.0646254	0.0658789	0.59417	4311.38	-0.235266	0.0465426	3.01471e-06	5602.23	1.20504	0.16472	2.44105e-12	6524.82	1.5365	0.181079	1.97163e-16	Gran-specific TNF	Conserved diff
ENSG00000183513	COA5	559.35	-0.164686	0.102437	0.311934	482.321	-0.626902	0.11649	5.68886e-07	1656.46	-0.256259	0.167734	0.222331	1710.89	-0.12092	0.185235	0.622197	Gran-specific TNF	NA
ENSG00000115446	UNC50	1105.9	0.0488709	0.0882893	0.782683	748.687	-0.428388	0.0807645	8.49694e-07	2712.89	-0.0641693	0.194254	0.829959	2753.31	0.0116933	0.214717	0.970796	Gran-specific TNF	NA
ENSG00000071073	MGAT4A	3004.23	-0.257995	0.0574844	0.000117977	3669.61	-1.00141	0.0569966	2.7705e-67	5205.38	0.759841	0.139882	3.28743e-07	3657.97	-0.125366	0.151933	0.523903	Conserved TNF	ATRA-specific
ENSG00000135951	TSGA10	148.712	-0.0269486	0.170968	0.943272	340.336	-0.00468435	0.125932	0.983828	354.555	-0.465944	0.11139	0.000118951	246.893	-2.20785	0.175367	4.88666e-35	NA	Conserved diff
ENSG00000144182	LIPT1	173.055	-0.137004	0.173073	0.678222	150.574	-0.697276	0.161685	9.0409e-05	311.881	-0.16849	0.209764	0.562562	258.564	-0.775815	0.225942	0.00169849	Gran-specific TNF	TPA-specific
ENSG00000158411	MITD1	881.555	0.41865	0.0809063	4.79039e-06	1000.85	0.655293	0.07786	6.39746e-16	2079.54	0.0257378	0.177812	0.927511	1719.15	-0.540438	0.190083	0.010664	Conserved TNF	TPA-specific
ENSG00000185414	MRPL30	1349.4	0.0549147	0.0803369	0.727768	679.548	0.00204617	0.0840724	0.989172	2873.43	-0.769621	0.156991	4.8303e-06	2689.81	-0.992643	0.181635	2.22057e-07	NA	Conserved diff
ENSG00000185674	LYG2	37.005	-0.227407	0.352704	0.745903	9.02218	0.112166	0.643476	0.925182	59.0523	-0.96276	0.253831	0.000548014	44.2734	-2.76841	0.366295	3.12702e-13	NA	Conserved diff
ENSG00000144214	LYG1	36.1446	-0.359012	0.348748	0.57327	36.0504	0.262671	0.321049	0.591346	65.366	0.508531	0.248788	0.0864806	81.8955	1.05572	0.289874	0.000816726	NA	TPA-specific
ENSG00000158417	EIF5B	9778.64	0.168243	0.0508195	0.00861084	3968.8	0.23938	0.0510873	1.74876e-05	14166.8	-0.95693	0.214662	3.71932e-05	14163.7	-0.911099	0.238622	0.00042579	Conserved TNF	Conserved diff
ENSG00000135945	REV1	1944.9	0.102946	0.0663859	0.33543	1894.48	0.323259	0.0576887	1.73797e-07	3040.89	0.093957	0.119825	0.57349	2457.69	-0.529577	0.133099	0.000229859	Gran-specific TNF	TPA-specific
ENSG00000273306	AC018690.1	80.8203	-0.301716	0.223678	0.422881	43.745	0.116722	0.356506	0.849436	61.8314	-0.339451	0.264076	0.31823	54.3051	-0.736538	0.301665	0.0311193	NA	TPA-specific
ENSG00000170500	LONRF2	25.877	-0.328949	0.397912	0.663768	4.22475	1.12491	0.990071	0.425329	59.9615	-3.5831	0.360394	4.86385e-22	1823.52	5.01201	0.240045	7.25096e-95	NA	Opposite diff
ENSG00000115526	CHST10	418.308	-0.165971	0.110009	0.353301	212.862	0.263597	0.156262	0.197413	701.182	-0.645739	0.12717	2.04469e-06	1251.19	0.970918	0.168837	4.56575e-08	NA	Opposite diff
ENSG00000115539	PDCL3	1127.07	-0.0121542	0.0795585	0.944771	548.615	0.146419	0.0905665	0.220323	1807.8	-0.770863	0.243801	0.00477951	2322.58	0.0839075	0.266697	0.822386	NA	ATRA-specific
ENSG00000204634	TBC1D8	1531.35	-0.158487	0.0774245	0.162256	3896.16	-0.463894	0.0499764	3.20765e-19	6308.45	1.51418	0.171318	1.33305e-17	6055.66	1.46023	0.182958	1.20074e-14	Gran-specific TNF	Conserved diff
ENSG00000158435	CNOT11	2371.72	-0.0666409	0.0652396	0.576424	1814.78	-0.150529	0.0588609	0.032665	5955.84	-0.113434	0.165593	0.629826	5754.69	-0.18281	0.191667	0.454464	Gran-specific TNF	NA
ENSG00000163162	RNF149	1023.6	-0.466617	0.0766948	3.20444e-08	2373.16	-0.708834	0.0620997	1.01132e-28	5526.24	1.59678	0.165085	6.5884e-21	7112.61	2.08416	0.190779	1.30558e-26	Conserved TNF	Conserved diff
ENSG00000196460	RFX8	245.486	-0.483564	0.139291	0.00519677	419.489	-0.758361	0.101648	1.12916e-12	735.642	0.294901	0.167338	0.149171	1567.46	1.9296	0.262297	1.37943e-12	Conserved TNF	TPA-specific
ENSG00000071054	MAP4K4	4520.24	0.105556	0.0590714	0.244284	3595.61	0.475677	0.064233	1.69637e-12	7276.34	-0.161696	0.139961	0.378291	15133.3	1.57982	0.164975	1.1533e-20	Gran-specific TNF	TPA-specific
ENSG00000115604	IL18R1	1093.14	1.82067	0.0910637	2.32072e-86	1027.23	3.17293	0.0923647	3.86075e-256	918.385	0.467172	0.130096	0.001146	3843.6	3.18552	0.126217	2.69002e-138	Conserved TNF	Conserved diff
ENSG00000115607	IL18RAP	231.998	2.01703	0.150976	1.319e-38	227.5	1.40969	0.153643	8.57726e-19	333.76	1.88746	0.170007	2.8151e-27	788.319	3.35666	0.169945	5.65971e-85	Conserved TNF	Conserved diff
ENSG00000236525	AC007278.2	25.2751	2.24665	0.452723	1.33832e-05	24.0174	0.963885	0.395773	0.0438063	4.40982	1.98366	0.761886	0.023571	12.6072	3.73995	0.726903	1.18899e-06	Conserved TNF	Conserved diff
ENSG00000234389	AC007278.1	24.4665	2.24824	0.444874	8.63308e-06	23.5903	1.24268	0.443222	0.0172383	6.12241	1.33224	0.694406	0.111366	14.4702	2.88487	0.651458	3.55653e-05	Conserved TNF	TPA-specific
ENSG00000135953	MFSD9	645.159	-0.117706	0.100083	0.504144	735.579	-0.126154	0.0773497	0.2155	1404.48	0.382958	0.128466	0.00829178	1331.33	0.277359	0.152512	0.121658	NA	ATRA-specific
ENSG00000170417	TMEM182	207.866	-0.0937171	0.144615	0.744669	211.679	-0.863453	0.142979	1.43262e-08	345.632	-0.0286127	0.131067	0.890361	266.861	-0.871852	0.197844	3.89906e-05	Gran-specific TNF	TPA-specific
ENSG00000135972	MRPS9	1304.97	0.0503527	0.0714992	0.718638	528.998	-0.241678	0.0933008	0.0301094	1597.41	-1.07292	0.239974	3.51235e-05	1529.9	-1.22305	0.260097	1.02664e-05	Gran-specific TNF	Conserved diff
ENSG00000135966	TGFBRAP1	2352.54	-0.120479	0.0611594	0.183122	1351.58	0.0528213	0.0619957	0.57277	3954.72	-0.556536	0.167191	0.00280125	4621.05	-0.016154	0.189585	0.95366	NA	ATRA-specific
ENSG00000272994	AC012360.3	249.97	0.0446515	0.138424	0.877635	124.254	0.0452148	0.174697	0.883941	293.178	-0.500002	0.163492	0.00658014	225.104	-1.60063	0.225987	9.7381e-12	NA	Conserved diff
ENSG00000071051	NCK2	1240.34	0.440477	0.076718	2.38056e-07	1072.73	1.5147	0.0722218	1.11134e-95	2123.81	-0.393093	0.13659	0.0111768	2935.48	0.55094	0.178932	0.00531304	Conserved TNF	Opposite diff
ENSG00000115652	UXS1	1704.91	0.640544	0.0687424	7.15285e-19	3404.86	1.56961	0.0521325	8.49727e-197	3296.89	0.415404	0.18495	0.0559995	4645.58	1.21782	0.221142	1.7731e-07	Conserved TNF	TPA-specific
ENSG00000153165	RGPD3	37.6349	0.151378	0.349548	0.831014	38.9394	0.0527173	0.313336	0.927731	123.392	0.805165	0.214098	0.000615701	124.383	0.852996	0.226913	0.00053188	NA	Conserved diff
ENSG00000135968	GCC2	2034.14	0.104957	0.0787708	0.43067	2269.68	-0.218629	0.0582159	0.000818192	3769.13	0.34441	0.165924	0.081075	4501.94	0.80472	0.174754	1.61088e-05	Gran-specific TNF	TPA-specific
ENSG00000214184	GCC2-AS1	29.0312	-0.328868	0.411227	0.674867	26.6054	-0.184621	0.375291	0.767715	18.8795	-0.567914	0.380638	0.235395	15.949	-1.17811	0.429607	0.014165	NA	TPA-specific
ENSG00000169756	LIMS1	2108.88	0.0689498	0.0647457	0.556216	6378.3	0.114517	0.0534144	0.0838446	7297.33	1.84239	0.122257	1.20885e-49	19438.1	3.50755	0.156768	8.04418e-109	NA	Conserved diff
ENSG00000153201	RANBP2	15372.1	0.111647	0.0494232	0.110975	10743.6	0.152634	0.0420477	0.00128769	15790.7	0.100839	0.174427	0.690656	19947.6	0.724743	0.17811	0.000160703	Gran-specific TNF	TPA-specific
ENSG00000163006	CCDC138	1667.83	-0.0672801	0.0682137	0.592179	413.9	-0.32537	0.112253	0.0132741	1071.95	-1.45273	0.144282	1.3964e-22	888.405	-2.78231	0.150083	5.99182e-75	Gran-specific TNF	Conserved diff
ENSG00000227470	AC073415.1	85.926	0.180643	0.232717	0.685443	17.0098	-0.990071	0.474209	0.0942427	26.3729	-0.939019	0.40579	0.0478063	20.5736	-2.267	0.486771	1.2644e-05	NA	Conserved diff
ENSG00000172985	SH3RF3	285.036	-0.0647139	0.132016	0.80765	1467.91	0.172727	0.0695975	0.0392286	2387.92	3.25213	0.15945	1.97532e-90	499.767	0.302205	0.192095	0.188535	Gran-specific TNF	ATRA-specific
ENSG00000015568	RGPD5	32.166	0.0569417	0.349134	0.941077	18.5158	0.176951	0.456509	0.820089	148.92	0.160234	0.206815	0.57854	191.416	0.814798	0.213034	0.000415564	NA	TPA-specific
ENSG00000204588	LINC01123	152.634	-0.481727	0.166756	0.0278118	43.093	-0.786609	0.300499	0.0281139	283.57	-2.76115	0.183243	1.23565e-49	283.668	-2.62286	0.230995	1.12134e-28	Conserved TNF	Conserved diff
ENSG00000175772	LINC01106	197.814	-0.617194	0.147631	0.000414928	49.041	-0.995178	0.284977	0.00207879	201.718	-2.91221	0.179107	1.07443e-57	203.185	-2.67783	0.270972	6.01675e-22	Conserved TNF	Conserved diff
ENSG00000169679	BUB1	5681.53	0.062992	0.0574361	0.540845	2373.94	-0.368045	0.0528452	3.81366e-11	5107.25	-0.388632	0.160256	0.0367673	3399.53	-2.40722	0.181564	9.20688e-39	Gran-specific TNF	Conserved diff
ENSG00000153094	BCL2L11	4542.83	0.738275	0.0651735	8.7426e-28	2538.49	0.603108	0.0547017	7.66604e-27	6172.16	-0.528145	0.136637	0.000417222	6648.89	-0.237953	0.158571	0.212218	Conserved TNF	ATRA-specific
ENSG00000172965	MIR4435-2HG	921.821	0.0184036	0.0827229	0.918754	1719.38	0.322376	0.058229	2.49804e-07	1202.7	-0.129095	0.187012	0.626841	1233.57	-0.0205424	0.20378	0.944972	Gran-specific TNF	NA
ENSG00000227992	AC108463.1	38.5634	-0.21697	0.39468	0.784401	47.5949	-0.656372	0.286615	0.061212	49.315	-0.579723	0.241483	0.0389869	47.6432	-0.654076	0.273992	0.0355401	NA	Conserved diff
ENSG00000271590	AC108463.3	35.9748	0.171818	0.350743	0.80771	76.3936	-0.962458	0.240517	0.000321262	21.8265	-0.0244805	0.580712	0.979903	19.5634	-0.302492	0.634332	0.725635	Gran-specific TNF	NA
ENSG00000226928	RPS14P4	25.4849	-0.166326	0.402075	0.837487	59.5854	0.650459	0.252919	0.0315257	1.60303	-1.69519	1.43141	0.364222	1.33352	-2.91101	1.71487	0.151889	Gran-specific TNF	NA
ENSG00000279191	AC068491.4	200.615	0.0733612	0.14942	0.807364	547.757	0.73649	0.0915444	1.29948e-14	37.6887	-0.250055	0.293493	0.536246	27.2845	-1.50854	0.348237	5.38033e-05	Gran-specific TNF	TPA-specific
ENSG00000224959	AC017002.1	99.6105	-0.0564812	0.220643	0.904767	279.642	0.940781	0.127462	2.01922e-12	4.61869	0.833783	0.688539	0.351565	5.49044	1.24205	0.80743	0.199661	Gran-specific TNF	NA
ENSG00000153107	ANAPC1	8605.2	-0.0239509	0.0532211	0.825102	3816.19	-0.14438	0.0476597	0.00909528	8634.18	-0.754427	0.178131	9.59179e-05	7876.77	-1.08222	0.186826	3.59452e-08	Gran-specific TNF	Conserved diff
ENSG00000153214	TMEM87B	1338.6	-0.0695927	0.0746331	0.61783	3309.6	-0.258568	0.0552082	1.7671e-05	4210.72	1.19945	0.109382	1.2424e-26	5186.69	1.63752	0.139145	9.88522e-31	Gran-specific TNF	Conserved diff
ENSG00000144161	ZC3H8	1134.46	-0.10906	0.0780996	0.401464	729.775	-0.140402	0.0835158	0.199185	2093.2	-1.04155	0.110142	4.9924e-20	1919.07	-1.40012	0.124147	2.65344e-28	NA	Conserved diff
ENSG00000188177	ZC3H6	85.6495	-0.392904	0.223534	0.254366	550.887	-1.23074	0.0967823	1.67649e-35	416.794	1.03287	0.161067	1.0926e-09	365.628	0.772944	0.176248	4.27312e-05	Gran-specific TNF	Conserved diff
ENSG00000169629	RGPD8	34.5095	-0.587691	0.389719	0.353312	20.0687	0.441229	0.438401	0.490871	98.8403	-0.0847098	0.206889	0.787704	125.915	0.591949	0.199489	0.00744186	NA	TPA-specific
ENSG00000114999	TTL	3268.97	0.272605	0.070801	0.00144023	3482.56	1.47592	0.0501636	6.23473e-188	3751.96	-0.247978	0.091135	0.0172967	5774.42	0.904051	0.113475	1.34421e-14	Conserved TNF	Opposite diff
ENSG00000125630	POLR1B	4676.46	-0.0465561	0.0549854	0.655033	977.653	-0.201151	0.0740734	0.0218443	3713.17	-1.51141	0.167332	2.40558e-18	3741.45	-1.401	0.181465	9.0881e-14	Gran-specific TNF	Conserved diff
ENSG00000237753	AC079922.2	22.6848	-0.86956	0.42474	0.162249	23.9831	-0.662918	0.456383	0.281889	147.702	-1.14473	0.21514	5.90856e-07	249.445	0.569094	0.191165	0.0072313	NA	Opposite diff
ENSG00000144136	SLC20A1	5040.67	0.144114	0.0573067	0.0665523	3698.93	1.30746	0.0482309	1.41946e-159	7139.31	-0.814184	0.0975825	8.84547e-16	26901	2.31767	0.105654	1.20707e-104	Gran-specific TNF	Opposite diff
ENSG00000169607	CKAP2L	2620.87	0.509002	0.0663462	7.23431e-13	1701.27	0.550976	0.0594362	3.59397e-19	2382.4	-0.266289	0.17296	0.218181	1527.03	-2.40584	0.183227	4.90984e-38	Conserved TNF	TPA-specific
ENSG00000115008	IL1A	132.485	4.34716	0.288593	4.70713e-49	1577.65	7.14535	0.180338	0	97.2685	2.74616	0.34039	8.19134e-15	147.003	3.43131	0.240306	8.27881e-45	Conserved TNF	Conserved diff
ENSG00000125538	IL1B	1547.25	2.66222	0.0819967	3.08344e-228	4205.86	4.96072	0.0789937	0	1509.85	0.326309	0.260387	0.332236	6551.66	3.15307	0.231858	9.84177e-41	Conserved TNF	TPA-specific
ENSG00000136689	IL1RN	103.193	2.00047	0.242193	7.11819e-15	324.433	8.47432	0.598069	5.9621e-44	95.941	-3.24244	0.264412	4.12838e-33	2953.18	5.06725	0.201559	3.07881e-137	Conserved TNF	Opposite diff
ENSG00000125637	PSD4	3548.41	-0.18969	0.0584203	0.0103697	6528.62	-0.0484184	0.0460914	0.469226	12505.7	0.908378	0.136316	2.14866e-10	13321.3	1.07391	0.146768	1.83582e-12	Pro-specific TNF	Conserved diff
ENSG00000136682	CBWD2	2364.65	0.177185	0.0649325	0.0410731	1469.84	-0.0871398	0.0610286	0.292092	3261.9	-0.497979	0.15255	0.00345341	3287.87	-0.430517	0.167781	0.0227586	Pro-specific TNF	Conserved diff
ENSG00000184492	FOXD4L1	41.7829	0.0695895	0.326051	0.921586	38.8439	0.170365	0.324545	0.749534	58.9521	0.579526	0.268313	0.067632	59.5349	0.627771	0.245978	0.0235706	NA	TPA-specific
ENSG00000146556	WASH2P	309.454	-0.148082	0.120202	0.478705	935.83	-0.529832	0.0723621	3.10661e-12	1919.64	1.0861	0.186733	3.93217e-08	1269.75	0.12435	0.188596	0.61831	Gran-specific TNF	ATRA-specific
ENSG00000236397	DDX11L2	40.1846	0.774002	0.319897	0.0811087	16.9831	0.0584144	0.471489	0.946399	100.952	-1.1963	0.209382	7.01374e-08	89.4854	-1.77678	0.233241	1.98602e-13	NA	Conserved diff
ENSG00000279267	AL078621.3	65.3428	-0.266255	0.268311	0.589332	56.6753	-0.303124	0.266027	0.423597	200.502	-0.720965	0.161709	3.71028e-05	289.925	0.435147	0.173751	0.0266072	NA	Opposite diff
ENSG00000240356	RPL23AP7	239.204	-0.0600102	0.141704	0.833922	149.357	-0.271061	0.158478	0.189669	433.928	-0.500065	0.141884	0.0014462	526.34	0.133079	0.164149	0.532224	NA	ATRA-specific
ENSG00000227359	AC017074.1	84.4049	-0.211518	0.219662	0.603702	74.9341	-0.634516	0.224321	0.0161012	120.359	-0.18596	0.208799	0.513984	136.442	0.207316	0.215588	0.45041	Gran-specific TNF	NA
ENSG00000115084	SLC35F5	4198.82	0.0428799	0.0597624	0.713227	3502.38	0.0568117	0.0613454	0.532431	4078.76	0.236549	0.154751	0.222056	5040.36	0.788466	0.166858	9.21786e-06	NA	TPA-specific
ENSG00000115091	ACTR3	14842.9	0.200669	0.061052	0.00921928	26874.7	0.122706	0.0435603	0.0166205	35339.9	0.843374	0.155143	3.21925e-07	41306.7	1.20446	0.188328	9.47482e-10	Conserved TNF	Conserved diff
ENSG00000088205	DDX18	4562.46	0.23408	0.0676836	0.00541085	1540.21	-0.0745168	0.0629647	0.402206	4645.49	-0.705896	0.126184	1.36299e-07	4616.33	-0.683793	0.156053	4.34283e-05	Pro-specific TNF	Conserved diff
ENSG00000236255	AC009404.1	151.404	0.00897679	0.170717	0.982981	49.5768	-0.057156	0.279868	0.910255	148.139	-1.20573	0.190368	1.78951e-09	159.052	-0.829476	0.319458	0.021001	NA	Conserved diff
ENSG00000125633	CCDC93	1078.2	0.154194	0.0778056	0.180121	824.993	0.479396	0.0783218	8.78223e-09	1541.56	-0.0583039	0.17379	0.827176	1620.81	0.122473	0.179987	0.606444	Gran-specific TNF	NA
ENSG00000125629	INSIG2	257.205	0.0597034	0.133114	0.825661	372.267	-0.517069	0.114885	4.01811e-05	813.121	0.817607	0.160204	1.80134e-06	702.723	0.500017	0.189441	0.0187518	Gran-specific TNF	Conserved diff
ENSG00000115107	STEAP3	717.006	-0.410284	0.0945895	0.00021885	118.105	-0.704179	0.192883	0.00119537	504.958	-1.95226	0.109039	8.12926e-70	843.576	0.174004	0.160578	0.388436	Conserved TNF	ATRA-specific
ENSG00000186132	C2orf76	94.9614	0.610804	0.2103	0.0266367	120.772	0.247794	0.179931	0.31357	175.888	0.624011	0.289145	0.0678968	225.841	1.19957	0.302255	0.000239166	Pro-specific TNF	TPA-specific
ENSG00000155368	DBI	1435.18	0.0992206	0.0726	0.414389	1887.65	0.286289	0.067258	0.00011451	5973.64	0.762105	0.256165	0.00843616	11266.7	2.04954	0.278643	1.38968e-12	Gran-specific TNF	Conserved diff
ENSG00000144120	TMEM177	276.061	0.0302861	0.138816	0.919995	82.0265	-0.454205	0.224025	0.106285	308.444	-1.49718	0.195178	1.77596e-13	282.146	-1.98292	0.220268	2.25304e-18	NA	Conserved diff
ENSG00000088179	PTPN4	485.569	0.00156804	0.101159	0.994741	348.023	-0.76782	0.117906	7.80508e-10	558.035	-0.151522	0.170881	0.516055	513.908	-0.369507	0.183798	0.0831377	Gran-specific TNF	NA
ENSG00000115109	EPB41L5	167.066	-0.033497	0.157455	0.92207	181.24	-0.257584	0.155035	0.205687	223.953	-0.169338	0.16409	0.439992	143.725	-2.1207	0.201611	9.74213e-25	NA	TPA-specific
ENSG00000144118	RALB	883.361	-0.00969595	0.079717	0.955386	1748.34	-0.0540353	0.0581661	0.530817	3409.06	0.944772	0.176819	5.25903e-07	3413.55	0.972582	0.212458	1.82294e-05	NA	Conserved diff
ENSG00000074054	CLASP1	1557.27	-0.0489832	0.0780659	0.752137	1638.06	-0.0330395	0.0657442	0.761819	2203.84	0.417521	0.213964	0.104411	2419.14	0.676624	0.217472	0.00481222	NA	TPA-specific
ENSG00000236859	NIFK-AS1	99.6171	-0.265732	0.20632	0.450498	79.8452	-0.773249	0.217604	0.00168431	260.156	-0.476804	0.244876	0.105288	194.654	-1.74204	0.2843	4.96936e-09	Gran-specific TNF	TPA-specific
ENSG00000155438	NIFK	1662.66	0.13353	0.0745297	0.243114	754.367	0.0117969	0.08185	0.938374	2129.45	-1.29921	0.203811	1.38508e-09	2162.94	-1.16934	0.218882	4.28838e-07	NA	Conserved diff
ENSG00000211460	TSN	2437.02	-0.0321015	0.0633349	0.801406	1042.91	-0.14981	0.0695217	0.0820503	4802.66	-0.758934	0.171446	4.25774e-05	4517.43	-0.960678	0.194465	3.3113e-06	NA	Conserved diff
ENSG00000136732	GYPC	990.918	0.513582	0.0819655	1.09323e-08	384.497	1.97841	0.124397	3.14943e-55	1845.77	-1.35376	0.261854	1.28581e-06	1614.93	-2.11716	0.29062	2.31317e-12	Conserved TNF	Conserved diff
ENSG00000235128	AC013474.1	31.5356	1.85314	0.426944	0.000216387	14.3986	2.55229	0.601814	0.000122	1.94936	-1.50047	1.26425	0.362918	1.94505	-1.4536	1.24246	0.346787	Conserved TNF	NA
ENSG00000136717	BIN1	140.969	-0.0542803	0.201087	0.899567	44.4533	-0.00825236	0.309197	0.98845	203.875	-2.80263	0.255904	1.44121e-26	315.907	-0.336568	0.259346	0.291012	NA	ATRA-specific
ENSG00000169967	MAP3K2	1746.59	0.168145	0.068502	0.0754108	2232.56	0.193819	0.054702	0.00174527	2495.88	0.42746	0.144659	0.00894697	3130.88	0.985591	0.156927	1.94784e-09	Gran-specific TNF	Conserved diff
ENSG00000144231	POLR2D	1543.81	-0.108836	0.0725964	0.357014	748.597	0.0268312	0.0802024	0.845724	2242.77	-0.882371	0.12795	4.54409e-11	2105.76	-1.10341	0.165532	1.64946e-10	NA	Conserved diff
ENSG00000144233	AMMECR1L	816.359	0.0458743	0.089032	0.798031	561.973	0.340278	0.0889312	0.000628662	1243.75	-0.236395	0.138977	0.166399	1477.08	0.291261	0.165539	0.13587	Gran-specific TNF	NA
ENSG00000136715	SAP130	764.965	-0.175245	0.0894566	0.186436	598.701	-0.15279	0.0925179	0.209012	1488.09	0.122341	0.139714	0.52213	1217.83	-0.450541	0.148974	0.00627936	NA	TPA-specific
ENSG00000136731	UGGT1	4636.52	-0.0652139	0.0565637	0.515134	3956.5	-0.0914956	0.0561992	0.216429	6448.49	0.226282	0.183226	0.340211	5010.69	-0.49716	0.188836	0.0190934	NA	TPA-specific
ENSG00000136720	HS6ST1	1249.96	-0.534562	0.0867213	1.99275e-08	294.9	0.0637798	0.115908	0.735616	2387.3	-1.69398	0.11099	6.57873e-51	3957.92	0.259345	0.182793	0.242053	Pro-specific TNF	ATRA-specific
ENSG00000136699	SMPD4	1939.32	-0.0470981	0.0792724	0.766097	812.493	0.188303	0.0749316	0.0363611	2708.14	-0.610415	0.137028	3.77088e-05	2535.3	-0.812146	0.173561	1.14107e-05	Gran-specific TNF	Conserved diff
ENSG00000152082	MZT2B	1304.06	-0.189178	0.208676	0.629987	902.42	0.14565	0.0842368	0.183943	1590.07	-0.642504	0.287381	0.0572786	1330.76	-1.36855	0.320018	6.81055e-05	NA	TPA-specific
ENSG00000136718	IMP4	2055.37	-0.0521445	0.0692273	0.696305	630.307	-0.192563	0.106134	0.158803	2887.81	-1.16063	0.150074	1.10134e-13	2860.98	-1.14977	0.211008	2.42071e-07	NA	Conserved diff
ENSG00000072135	PTPN18	308.757	-0.157362	0.124292	0.461749	739.281	-0.563815	0.0792314	1.336e-11	1817.24	0.886062	0.11246	3.61606e-14	1795.04	0.884699	0.164401	3.48463e-07	Gran-specific TNF	Conserved diff
ENSG00000152102	FAM168B	2360.07	-0.0433736	0.067193	0.745655	2047.6	0.216953	0.0552988	0.000435418	5638.44	0.227152	0.140824	0.193285	6087.78	0.458121	0.176084	0.0207107	Gran-specific TNF	TPA-specific
ENSG00000115762	PLEKHB2	3185.02	0.0220302	0.0648463	0.870221	2606.87	0.026662	0.052736	0.759798	6459.3	0.387256	0.123466	0.00517188	10023.6	1.39279	0.167723	8.9085e-16	NA	Conserved diff
ENSG00000173272	MZT2A	832.327	-0.249314	0.198759	0.467911	470.798	0.192666	0.107929	0.167027	2143.18	-0.684088	0.260906	0.0224648	1984.26	-0.948233	0.283127	0.00225426	NA	Conserved diff
ENSG00000152117	AC073869.1	565.477	0.142483	0.100744	0.39439	326.032	0.402717	0.116959	0.00245173	1383.24	-0.613121	0.112137	2.72079e-07	1452.73	-0.39897	0.11928	0.00228765	Gran-specific TNF	Conserved diff
ENSG00000197927	C2orf27A	104.251	-0.090263	0.21104	0.833062	28.2485	-0.892158	0.373777	0.0490607	92.0182	-1.14585	0.204191	1.23697e-07	141.046	0.326887	0.204619	0.180905	Gran-specific TNF	ATRA-specific
ENSG00000152127	MGAT5	1063.93	-0.0701489	0.0794749	0.640202	804.873	-0.0483881	0.0856649	0.72789	2129.54	0.161856	0.170844	0.48441	3110.46	1.09415	0.192983	7.21116e-08	NA	TPA-specific
ENSG00000082258	CCNT2	1186.2	0.170526	0.0815586	0.150766	1600.07	0.0157984	0.0702634	0.900506	1916.3	0.776059	0.128312	1.01637e-08	1616.12	0.398401	0.141875	0.0117845	NA	Conserved diff
ENSG00000115839	RAB3GAP1	846.16	0.0779712	0.0933388	0.660099	841.706	-0.144672	0.0769327	0.140797	1543.92	0.401763	0.148416	0.0179528	1900.83	0.921029	0.163697	9.17182e-08	NA	Conserved diff
ENSG00000121988	ZRANB3	364.225	-0.154005	0.117738	0.441724	179.57	-0.349778	0.154048	0.0639749	375.367	-1.05486	0.148723	1.17896e-11	298.941	-2.36191	0.169129	6.66932e-43	NA	Conserved diff
ENSG00000235651	AC064850.1	48.7356	-0.614368	0.296647	0.155585	13.8068	-0.333941	0.570027	0.716355	14.8455	-1.14898	0.460899	0.0311611	10.7992	-3.88187	0.848949	1.86742e-05	NA	Conserved diff
ENSG00000048991	R3HDM1	1996.88	0.00269872	0.072394	0.988017	1057.99	-0.0260693	0.0730352	0.835125	2351.97	-0.681791	0.185154	0.000822982	2224.96	-0.846755	0.187247	2.34522e-05	NA	Conserved diff
ENSG00000144224	UBXN4	2123.75	0.174402	0.0652454	0.0468268	2541.49	0.0987785	0.0568039	0.18095	5327.76	0.229409	0.0891183	0.0254313	5096.42	0.143204	0.114409	0.310423	Pro-specific TNF	ATRA-specific
ENSG00000076003	MCM6	6288.83	0.0212546	0.0555659	0.851724	1486.94	-0.153724	0.0654178	0.053372	8177.72	-1.1248	0.157249	7.74167e-12	6366.02	-2.74744	0.197996	2.26518e-42	NA	Conserved diff
ENSG00000115866	DARS	1878.85	0.0795988	0.0734587	0.546711	778.67	0.0944296	0.0808162	0.409081	4138.86	-0.654175	0.149573	5.3591e-05	3725.67	-1.0294	0.16284	1.51026e-09	NA	Conserved diff
ENSG00000231890	DARS-AS1	61.765	-0.147473	0.272805	0.788284	24.5605	-0.663818	0.389525	0.191736	71.7382	-0.0252158	0.250855	0.950708	41.1773	-2.70504	0.330558	2.38849e-15	NA	TPA-specific
ENSG00000121966	CXCR4	913.847	1.22869	0.0986546	1.51795e-33	227.765	0.080499	0.135496	0.711938	3643.2	-0.198699	0.211513	0.488473	2270.79	-2.47324	0.193809	5.62622e-36	Pro-specific TNF	TPA-specific
ENSG00000150540	HNMT	43.6221	0.296875	0.33585	0.640039	270.04	-0.214536	0.119452	0.16394	571.868	3.11338	0.164402	4.83307e-78	207.082	1.33922	0.205596	4.45504e-10	NA	Conserved diff
ENSG00000228043	AC114763.1	39.5344	0.274092	0.330565	0.662161	24.0669	-1.08426	0.410016	0.0262543	10.2089	-0.230664	0.460572	0.734198	7.60726	-1.34101	0.606476	0.0536414	Gran-specific TNF	NA
ENSG00000144228	SPOPL	650.366	0.370573	0.10266	0.00330692	872.12	-0.204746	0.0813817	0.0360974	1095.36	0.763541	0.13233	5.10803e-08	1297.39	1.16107	0.151094	1.196e-13	Opposite TNF	Conserved diff
ENSG00000075884	ARHGAP15	2388.19	0.0433324	0.0716471	0.762482	3182.04	-0.295343	0.0586641	3.33053e-06	5634.07	0.22809	0.220036	0.437705	5792.02	0.329991	0.236142	0.25018	Gran-specific TNF	NA
ENSG00000283994	AC092652.3	75.7541	0.102084	0.243646	0.835486	147.563	-0.801003	0.164708	7.60132e-06	4.21872	0.768588	0.98447	0.575229	3.82396	0.591151	1.27787	0.734556	Gran-specific TNF	NA
ENSG00000121964	GTDC1	751.623	0.167097	0.0976644	0.271804	732.171	0.169213	0.0784275	0.0816068	839.844	0.0390677	0.155944	0.874656	1217.28	0.980502	0.181179	2.95723e-07	NA	TPA-specific
ENSG00000169554	ZEB2	7456.66	0.564411	0.0587207	4.55913e-20	7925.63	1.2424	0.0502777	1.16487e-132	7022.13	0.0657594	0.191179	0.822768	10688.5	1.10889	0.197224	9.37356e-08	Conserved TNF	TPA-specific
ENSG00000279166	AC009951.1	609.132	0.626258	0.107494	1.46712e-07	705.655	1.09102	0.0871063	1.84548e-34	11.5058	-1.21355	0.773062	0.207837	16.2476	0.0786439	0.80052	0.946285	Conserved TNF	NA
ENSG00000121989	ACVR2A	35.7496	-0.437048	0.343392	0.458513	29.7711	0.354891	0.368894	0.514036	74.0349	-0.212872	0.221731	0.477677	131.922	1.2418	0.192242	6.2997e-10	NA	TPA-specific
ENSG00000115947	ORC4	1296.01	-0.0107204	0.0772476	0.94969	1031.44	-0.580554	0.0708987	4.12227e-15	2143.37	-0.0364343	0.126387	0.853847	2157.52	0.0171518	0.1491	0.937095	Gran-specific TNF	NA
ENSG00000204406	MBD5	876.133	-0.101518	0.0975251	0.56762	2090.31	-0.421725	0.0602238	2.93403e-11	1256.42	0.977156	0.14976	5.32614e-10	1172.97	0.854895	0.165802	1.12387e-06	Gran-specific TNF	Conserved diff
ENSG00000135999	EPC2	1374.33	0.0847122	0.0699067	0.488599	1794.19	-0.189708	0.0585099	0.00472915	2422.77	0.496803	0.140061	0.00133417	2527.97	0.630064	0.167222	0.0005147	Gran-specific TNF	Conserved diff
ENSG00000184898	RBM43	93.0526	-0.452179	0.236178	0.200018	118.244	0.0309026	0.18835	0.929443	350.888	0.253019	0.120865	0.0779805	425.384	0.75666	0.152211	2.84372e-06	NA	TPA-specific
ENSG00000123609	NMI	1830.71	0.0983645	0.0725351	0.419488	2045.98	0.185237	0.0584698	0.00595589	4830.37	0.235472	0.230721	0.445825	3638.93	-0.603364	0.248511	0.0321788	Gran-specific TNF	TPA-specific
ENSG00000123610	TNFAIP6	144.288	7.18845	0.614463	1.32199e-29	251.555	8.10648	0.600046	5.34387e-40	18.5802	4.68338	0.698444	1.63351e-10	40.3406	5.85769	0.642393	7.92779e-19	Conserved TNF	Conserved diff
ENSG00000080345	RIF1	15909.8	0.457934	0.0606134	1.73033e-12	10621.3	1.06171	0.04471	1.46484e-122	10095.2	-0.217328	0.197916	0.406227	8608.87	-0.718322	0.201014	0.00104358	Conserved TNF	TPA-specific
ENSG00000183091	NEB	78.5264	-0.053867	0.223818	0.910692	132.577	-0.354608	0.166523	0.0864657	342.497	-1.14704	0.216344	6.5251e-07	387.319	-0.588882	0.249372	0.0378323	NA	Conserved diff
ENSG00000162980	ARL5A	3176.5	0.0551362	0.0714161	0.68771	1721.06	-0.59459	0.0662812	5.38758e-18	2892.62	-0.467014	0.100355	1.55421e-05	3007.28	-0.297101	0.12589	0.0379545	Gran-specific TNF	Conserved diff
ENSG00000182389	CACNB4	339.43	-0.19371	0.127741	0.350337	394.415	-0.278492	0.108966	0.0328047	430.678	0.524442	0.192497	0.0171383	288.59	-0.604211	0.21484	0.011651	Gran-specific TNF	Opposite diff
ENSG00000115145	STAM2	1343.11	0.0724969	0.0798615	0.629628	2200.97	-0.110975	0.0559061	0.115818	2040.16	1.03875	0.123613	5.39112e-16	1959.5	0.979432	0.137078	6.28376e-12	NA	Conserved diff
ENSG00000157827	FMNL2	353.412	-0.0909181	0.112781	0.672166	97.282	-0.196282	0.208735	0.525461	304.229	-0.986242	0.182155	3.60929e-07	1351.62	2.52784	0.172687	4.77961e-47	NA	Opposite diff
ENSG00000196504	PRPF40A	10018.4	0.173721	0.0507734	0.00610675	7060.75	-0.0509849	0.0439792	0.41334	14776.9	-0.168292	0.11143	0.228617	13967.5	-0.306585	0.135253	0.047231	Pro-specific TNF	TPA-specific
ENSG00000177917	ARL6IP6	913.804	0.144083	0.0829832	0.262061	641.893	-0.0584535	0.100911	0.719568	2755.46	-0.34268	0.12853	0.0200146	2511.34	-0.622479	0.169351	0.000722571	NA	Conserved diff
ENSG00000153234	NR4A2	79.4542	0.461212	0.243085	0.205684	54.2184	-0.558581	0.315603	0.17156	113.181	-0.50121	0.171389	0.00979001	357.794	2.15612	0.154494	7.57144e-43	NA	Opposite diff
ENSG00000115159	GPD2	1013.54	0.154452	0.0777227	0.178359	1186.9	0.51795	0.0824927	3.36509e-09	1663.52	0.374977	0.155209	0.0375731	1155.08	-0.700488	0.17583	0.000225414	Gran-specific TNF	Opposite diff
ENSG00000115165	CYTIP	199.232	-0.467386	0.160193	0.0257461	721.817	-0.105382	0.0798195	0.338238	873.651	0.976254	0.191987	1.97285e-06	8006.56	4.72853	0.211087	4.49751e-109	Pro-specific TNF	Conserved diff
ENSG00000144283	PKP4	4655.54	-0.0573754	0.0582364	0.592546	1555.35	-0.359883	0.062682	8.12797e-08	4795.81	-1.27291	0.131507	6.16208e-21	3896.19	-2.61783	0.144888	3.14231e-71	Gran-specific TNF	Conserved diff
ENSG00000196151	WDSUB1	563.003	-0.17169	0.101161	0.276727	464.013	-0.169879	0.0960073	0.171668	1035.68	-0.745962	0.199525	0.000668533	1067.08	-0.592377	0.214464	0.0134021	NA	Conserved diff
ENSG00000123636	BAZ2B	750.01	-0.0608112	0.0909942	0.735842	4049.38	-0.206689	0.0490649	0.000137644	3428.37	1.80763	0.192252	8.22387e-20	2838.96	1.47381	0.198897	9.35336e-13	Gran-specific TNF	Conserved diff
ENSG00000224152	AC009506.1	77.0193	-0.450552	0.227153	0.179548	157.79	-0.622305	0.17523	0.00169648	151.725	0.890951	0.189775	1.28632e-05	124.806	0.454746	0.243232	0.110435	Gran-specific TNF	ATRA-specific
ENSG00000226266	AC009961.1	22.3978	0.0670372	0.439641	0.944841	86.456	-0.195018	0.209627	0.530366	36.953	1.91712	0.288166	2.30728e-10	27.8154	1.39615	0.321738	5.21178e-05	NA	Conserved diff
ENSG00000136536	2007-03-01	3719.88	0.188247	0.0752601	0.0683267	5274.77	-0.00343254	0.0536325	0.971729	6582.6	0.599021	0.113301	7.06112e-07	6914.17	0.743778	0.132238	9.2685e-08	NA	Conserved diff
ENSG00000241399	CD302	933.208	-0.0800217	0.0791778	0.581156	1230.2	-0.267367	0.0690064	0.000524813	535.584	0.647964	0.213798	0.00715384	324.096	-0.799422	0.22861	0.00137028	Gran-specific TNF	Opposite diff
ENSG00000054219	LY75	41.7319	-0.277223	0.323053	0.65064	67.3153	-0.533305	0.25945	0.100622	214.9	0.387693	0.194717	0.0963716	411.542	1.79534	0.215308	6.70708e-16	NA	TPA-specific
ENSG00000153250	RBMS1	1803.78	0.249388	0.0789538	0.0133058	3197.54	0.708155	0.0545629	5.81654e-37	4078.68	0.85755	0.128595	2.08035e-10	4014.49	0.849542	0.155414	2.20638e-07	Conserved TNF	Conserved diff
ENSG00000136560	TANK	1510.41	1.24302	0.0939769	7.67049e-38	3731.57	1.21447	0.0520964	3.9028e-118	3544.29	1.41634	0.110317	3.1676e-36	4451.9	1.87376	0.146159	2.6568e-36	Conserved TNF	Conserved diff
ENSG00000115233	PSMD14	4579.58	0.107687	0.0601921	0.243919	2676.44	0.104398	0.055629	0.141867	6103.06	-0.664899	0.207374	0.00416076	5919.66	-0.738112	0.232985	0.00403604	NA	Conserved diff
ENSG00000226121	AC009487.2	81.78	0.12111	0.22593	0.790045	24.2144	-0.162673	0.403306	0.811693	295.705	-0.861973	0.206878	0.000127275	292.341	-0.855139	0.221482	0.000361867	NA	Conserved diff
ENSG00000115267	IFIH1	682.643	1.39671	0.0988536	3.59079e-43	1431.95	1.26021	0.0705372	1.49806e-69	2771.96	1.59939	0.16333	2.08699e-21	1877.89	0.818297	0.166525	3.76134e-06	Conserved TNF	Conserved diff
ENSG00000115271	GCA	771.908	0.149261	0.0949004	0.326551	2049.82	-0.422974	0.0752928	1.61151e-07	4725.91	1.48663	0.156428	3.21131e-20	2199.36	-0.340144	0.178047	0.101821	Gran-specific TNF	ATRA-specific
ENSG00000115339	GALNT3	462.625	-0.359749	0.109918	0.00960091	753.709	-0.728703	0.0841355	8.08907e-17	899.445	0.513489	0.115118	3.67643e-05	1310.84	1.36809	0.158328	5.2754e-17	Conserved TNF	Conserved diff
ENSG00000123607	TTC21B	1503.64	0.101295	0.0736175	0.410731	1036.11	-0.158393	0.0771918	0.101281	1448.98	-0.189432	0.114344	0.179754	1224.44	-0.721197	0.13401	3.47917e-07	NA	TPA-specific
ENSG00000198648	STK39	656.847	0.146745	0.107724	0.416477	261.179	-0.122246	0.123526	0.500088	1221.27	-1.50492	0.183949	3.30048e-15	1779.29	-0.0090286	0.178529	0.9732	NA	ATRA-specific
ENSG00000172292	CERS6	5610.05	0.083816	0.0551811	0.348945	6027.38	0.145525	0.0485732	0.0100139	5768.21	0.381226	0.287301	0.300821	4161.7	-0.547641	0.287667	0.103158	Gran-specific TNF	NA
ENSG00000163072	NOSTRIN	27.2178	-0.0517464	0.427547	0.955744	19.4053	-0.0333335	0.446575	0.96727	151.101	-0.0811013	0.350759	0.884281	86.3004	-2.94747	0.41182	5.76734e-12	NA	TPA-specific
ENSG00000152253	SPC25	1139.94	0.0663571	0.0830711	0.675358	614.028	-0.144793	0.0850833	0.192608	1435.13	-0.101766	0.214	0.749503	862.122	-2.52955	0.255836	5.72471e-22	NA	TPA-specific
ENSG00000073737	DHRS9	47.1965	-0.884674	0.30822	0.0289908	183.876	-1.94033	0.160208	2.90173e-32	213.495	3.18118	0.22689	4.59448e-43	264.119	3.53536	0.240676	2.27857e-47	Conserved TNF	Conserved diff
ENSG00000163093	BBS5	142.522	-0.152672	0.171431	0.637156	29.739	-0.397974	0.362133	0.443938	164.539	-1.7944	0.204526	2.34841e-17	163.006	-1.79166	0.256485	1.91623e-11	NA	Conserved diff
ENSG00000138399	FASTKD1	2425.91	0.0515957	0.0649066	0.676887	2057.22	-0.352549	0.0579741	1.11355e-08	4331.67	-0.265828	0.0774294	0.00197967	3550.63	-0.943272	0.105263	3.2467e-18	Gran-specific TNF	Conserved diff
ENSG00000138398	PPIG	4424.75	0.110491	0.0591827	0.216133	3087.47	-0.173421	0.0551009	0.00634439	7122.17	-0.0874094	0.126398	0.626062	6895.77	-0.147782	0.15351	0.449773	Gran-specific TNF	NA
ENSG00000144362	PHOSPHO2	99.7329	-0.225076	0.203075	0.536002	67.7935	-0.139889	0.241264	0.719346	113.671	-1.005	0.172104	3.43833e-08	103.126	-1.41605	0.206425	4.51573e-11	NA	Conserved diff
ENSG00000213160	KLHL23	2070.8	0.479212	0.0671032	3.48645e-11	417.197	0.689544	0.107924	1.70381e-09	1980.59	-1.88722	0.150259	1.07377e-34	1626.7	-4.14884	0.157188	3.51742e-151	Conserved TNF	Conserved diff
ENSG00000138385	SSB	7287.91	0.199907	0.0587261	0.0064207	2592.19	0.121571	0.0575907	0.0899425	10349.4	-0.779078	0.193415	0.000221812	9148.29	-1.26873	0.219931	4.12018e-08	Pro-specific TNF	Conserved diff
ENSG00000138382	METTL5	1383.79	0.0632778	0.07342	0.649394	580.573	-0.0278559	0.0890062	0.856728	2274.93	-1.05847	0.256247	0.00014738	2280.7	-1.00044	0.270541	0.000666617	NA	Conserved diff
ENSG00000144357	UBR3	2838.96	0.0820764	0.0619303	0.433368	2678.94	-0.230044	0.0566604	0.000255127	3010.2	0.323052	0.173694	0.124532	3217.31	0.523601	0.18406	0.010616	Gran-specific TNF	TPA-specific
ENSG00000128692	EIF2S2P4	46.527	0.369906	0.296454	0.471619	20.3566	0.0496348	0.422033	0.949193	162.173	-0.700162	0.288949	0.0369542	178.674	-0.325677	0.30489	0.396109	NA	ATRA-specific
ENSG00000115806	GORASP2	3018.31	0.0235827	0.057146	0.838091	1520.35	0.0545934	0.0662088	0.587408	5746.41	-0.544396	0.124324	5.23569e-05	5898.11	-0.412671	0.176594	0.0400904	NA	Conserved diff
ENSG00000198586	TLK1	4453.66	0.0250573	0.0648367	0.849623	3326.5	-0.338467	0.0482813	2.78069e-11	5793.5	-0.0504941	0.11518	0.771746	5086.41	-0.420841	0.145848	0.00945025	Gran-specific TNF	TPA-specific
ENSG00000123600	METTL8	2410.19	-0.00606722	0.0704285	0.970284	1271.86	-0.180986	0.0671445	0.0230069	1877.67	-0.586145	0.144834	0.000206308	1511.07	-1.48019	0.160172	2.59995e-19	Gran-specific TNF	Conserved diff
ENSG00000115827	DCAF17	1484.47	-0.0400167	0.0730731	0.785501	660.159	-0.450542	0.0852565	9.41036e-07	1828.36	-0.693813	0.14994	1.75339e-05	1508.74	-1.50247	0.163017	3.25516e-19	Gran-specific TNF	Conserved diff
ENSG00000233762	AC007969.1	157.517	-0.150788	0.202809	0.700807	139.548	0.320123	0.168495	0.135972	581.737	-0.258428	0.276436	0.490676	494.748	-0.792189	0.309725	0.023244	NA	TPA-specific
ENSG00000071967	CYBRD1	1493.27	-0.0843391	0.0709126	0.498177	974.827	-0.612228	0.0716827	2.26093e-16	3709.19	0.106193	0.113327	0.489568	3170.39	-0.327743	0.156349	0.0691314	Gran-specific TNF	NA
ENSG00000077380	DYNC1I2	2768.6	0.103972	0.0619886	0.283872	2974.01	0.259314	0.0497915	1.39282e-06	5556.19	0.136675	0.152758	0.511985	6001.25	0.372746	0.175133	0.0644106	Gran-specific TNF	NA
ENSG00000115840	SLC25A12	1495.51	0.190117	0.07685	0.0725031	1007.55	0.158522	0.0711732	0.070536	2833.4	-0.377093	0.0989168	0.000509453	2847.15	-0.321053	0.132281	0.0322423	NA	Conserved diff
ENSG00000128708	HAT1	3331.24	0.138916	0.0650751	0.139332	1516.08	0.00907316	0.0651271	0.939894	4935.73	-0.756587	0.211318	0.0011892	4434.06	-1.16461	0.233942	2.74818e-06	NA	Conserved diff
ENSG00000172878	METAP1D	455.724	-0.113122	0.103622	0.542732	206.959	-0.483502	0.138528	0.00209244	845.736	-0.964174	0.114622	5.02222e-16	775.005	-1.30811	0.123106	3.17784e-25	Gran-specific TNF	Conserved diff
ENSG00000144355	DLX1	564.763	-0.673238	0.0961254	8.85688e-11	165.558	-0.930067	0.164727	1.38262e-07	1037.94	-1.0996	0.116046	4.17941e-20	1319.83	-0.172518	0.136541	0.305522	Conserved TNF	ATRA-specific
ENSG00000115844	DLX2	61.312	-0.824744	0.26376	0.0145105	21.7379	-0.134259	0.424825	0.854993	74.8828	-2.29387	0.219859	3.42516e-24	237.38	1.51599	0.177019	1.01534e-16	Pro-specific TNF	Opposite diff
ENSG00000091409	ITGA6	598.23	-0.0817684	0.0996468	0.666532	5202.25	2.89164	0.0496225	0	2717.67	0.503019	0.121233	0.000136555	8791.31	2.79041	0.163229	7.37548e-64	Gran-specific TNF	Conserved diff
ENSG00000152256	PDK1	2321.22	-0.081534	0.080661	0.581142	944.444	-0.167798	0.0704251	0.0495278	1955.28	-0.525076	0.136008	0.000424235	1936.54	-0.513895	0.103844	3.17457e-06	Gran-specific TNF	Conserved diff
ENSG00000091436	MAP3K20	2466	0.0922746	0.0665545	0.405846	1071.79	0.103157	0.0746187	0.311265	2289.43	-1.1389	0.163957	3.22999e-11	2197.1	-1.27504	0.180371	1.07272e-11	NA	Conserved diff
ENSG00000144354	CDCA7	5012.7	-0.0136867	0.056294	0.909852	882.892	-0.26008	0.0770956	0.00309589	9407.43	-1.59135	0.115163	7.5803e-42	7096.78	-5.83171	0.120814	0	Gran-specific TNF	Conserved diff
ENSG00000224638	AC106900.1	26.2135	0.0744703	0.406502	0.933653	41.8405	0.316019	0.315625	0.493683	1.41913	3.22073	1.47455	0.0641444	2.29194	3.98603	1.4097	0.0111577	NA	TPA-specific
ENSG00000172845	SP3	4266.2	0.110818	0.055485	0.175888	4146.32	-0.0339648	0.0600866	0.727711	6858.67	0.312637	0.117251	0.0200044	6768.35	0.310672	0.138618	0.0500906	NA	ATRA-specific
ENSG00000138430	OLA1	6199.34	0.0951397	0.0560307	0.276687	2770.98	0.11995	0.0509916	0.0530858	12126.2	-1.04192	0.188391	1.93457e-07	11779.4	-1.12075	0.209928	4.36955e-07	NA	Conserved diff
ENSG00000144306	SCRN3	644.062	0.0422124	0.0940257	0.82549	639.315	-0.463193	0.0871684	8.0982e-07	1511.29	0.137282	0.11284	0.348744	1280.62	-0.32041	0.150642	0.0646081	Gran-specific TNF	NA
ENSG00000163328	GPR155	203.119	-0.143492	0.153305	0.616579	84.6076	-0.389329	0.212916	0.154973	263.957	-0.440929	0.177768	0.0321168	287.702	-0.123822	0.159374	0.551312	NA	ATRA-specific
ENSG00000115935	WIPF1	5846.45	-0.198153	0.0598189	0.00856199	12693.6	-0.706723	0.0477324	6.04084e-48	20181.9	1.63935	0.124084	2.59817e-38	16620.9	1.28234	0.163486	3.51234e-14	Conserved TNF	Conserved diff
ENSG00000235655	H3F3AP4	1624.27	-0.0699313	0.0676211	0.570774	2398.02	-0.0676053	0.0607187	0.43674	6144.62	0.733844	0.17988	0.00018141	4435.4	-0.0828105	0.220233	0.785859	NA	ATRA-specific
ENSG00000154518	ATP5G3	7073.15	0.0256508	0.0777528	0.873978	3964.62	0.107338	0.061822	0.181735	16754.7	-0.522671	0.233258	0.0566423	16213.8	-0.600731	0.258985	0.0417486	NA	TPA-specific
ENSG00000144320	LNPK	5156.63	-0.0252424	0.0558134	0.824475	4282.12	-0.176832	0.0479328	0.00104361	7050.53	0.259747	0.14548	0.143118	8988.48	0.876956	0.139957	2.13112e-09	Gran-specific TNF	TPA-specific
ENSG00000218175	AC016739.1	89.8804	-0.471751	0.253292	0.217508	107.628	0.582806	0.203168	0.014419	340.034	-0.303607	0.289631	0.431773	301.741	-0.684643	0.323892	0.0665466	Gran-specific TNF	NA
ENSG00000128654	MTX2	1418.63	-0.011026	0.0694028	0.942782	886.756	-0.188168	0.0785371	0.0480309	2692.41	-0.53249	0.207122	0.025638	2624.18	-0.584333	0.233589	0.0267891	Gran-specific TNF	Conserved diff
ENSG00000170144	HNRNPA3	22834	0.0514619	0.0547916	0.615309	11672.3	0.145679	0.0447054	0.00449249	29165.1	-0.371596	0.117206	0.00465416	24480.2	-0.98238	0.139913	1.4942e-11	Gran-specific TNF	Conserved diff
ENSG00000116044	NFE2L2	3046.07	1.01082	0.0591848	4.87433e-63	6141.21	2.16467	0.0458529	0	5100.76	0.276625	0.137096	0.0913006	7214.68	1.11443	0.174835	1.08412e-09	Conserved TNF	TPA-specific
ENSG00000225808	DNAJC19P5	42.3621	0.60112	0.315238	0.202541	108.275	2.14342	0.208468	1.98236e-23	5.91309	1.11244	0.676187	0.183166	10.2604	2.16883	0.583694	0.00062431	Gran-specific TNF	TPA-specific
ENSG00000213963	AC019080.1	64.1033	0.192995	0.251708	0.690191	156.855	-0.456938	0.160754	0.015485	130.754	0.55973	0.209842	0.0199519	113.764	0.242754	0.223319	0.38674	Gran-specific TNF	ATRA-specific
ENSG00000196659	TTC30B	174.707	-0.213206	0.162716	0.440787	97.5992	-1.25191	0.216879	6.81271e-08	395.75	-0.297364	0.140981	0.0754271	334.514	-0.859017	0.166713	1.14353e-06	Gran-specific TNF	TPA-specific
ENSG00000197557	TTC30A	61.0992	-0.162365	0.264397	0.758157	13.7333	-1.05848	0.534285	0.116742	88.7329	-0.170336	0.187616	0.504723	65.478	-1.27278	0.239134	4.75942e-07	NA	TPA-specific
ENSG00000223960	AC009948.1	858.443	-0.0266681	0.083697	0.879082	405.027	-0.265085	0.101746	0.0289971	1185.88	-0.456933	0.133371	0.00202693	1253.2	-0.23258	0.143966	0.175335	Gran-specific TNF	ATRA-specific
ENSG00000180228	PRKRA	1035.07	0.170497	0.0872534	0.188001	394.474	0.300131	0.106915	0.0170874	1416.7	-1.16724	0.131891	1.20589e-17	1425.29	-1.08439	0.141009	1.14462e-13	Gran-specific TNF	Conserved diff
ENSG00000079150	FKBP7	197.608	0.19044	0.161079	0.501237	56.327	-0.567987	0.288233	0.119175	341.903	-1.60168	0.18471	5.67438e-17	316.538	-2.02473	0.163454	5.99697e-34	NA	Conserved diff
ENSG00000116095	PLEKHA3	1730.17	0.568119	0.0702173	2.79307e-14	1373.08	-0.139938	0.0642765	0.0783691	839.614	-0.0616882	0.168226	0.809713	1015.24	0.480089	0.193025	0.0277746	Pro-specific TNF	TPA-specific
ENSG00000237298	TTN-AS1	234.162	1.76933	0.153593	1.02957e-28	65.1703	-0.473615	0.254456	0.146112	6.67878	-1.03569	0.674672	0.219765	7.21831	-0.651331	0.6883	0.458212	Pro-specific TNF	NA
ENSG00000155657	TTN	53.1528	2.13295	0.31291	3.20978e-10	5.30052	1.55497	0.908665	0.189419	89.4936	-1.92951	0.29714	6.51477e-10	93.9512	-1.52906	0.390562	0.000294444	Pro-specific TNF	Conserved diff
ENSG00000270277	AC009948.3	30.3292	2.49409	0.412349	3.98301e-08	3.62135	-0.618613	1.08346	0.724308	2.75726	-1.66813	1.02433	0.188203	2.10314	-4.38768	1.46729	0.00694782	Pro-specific TNF	TPA-specific
ENSG00000115232	ITGA4	11362.9	-0.220598	0.0582807	0.00180615	10213.5	-0.871739	0.0443882	6.02359e-84	21111.4	-0.00185211	0.22357	0.995887	24299.8	0.413607	0.228332	0.12323	Conserved TNF	NA
ENSG00000260742	AC009962.1	28.0278	0.0793084	0.37151	0.921586	35.2467	-0.316917	0.330101	0.514827	77.6414	0.127352	0.274004	0.756015	114.412	1.08373	0.241111	2.65379e-05	NA	TPA-specific
ENSG00000138434	SSFA2	3876.74	0.0882173	0.0606286	0.375409	3432.48	-0.153052	0.0482201	0.00584598	7149.35	0.16623	0.131102	0.325583	11528.6	1.30236	0.142222	5.58977e-19	Gran-specific TNF	TPA-specific
ENSG00000077232	DNAJC10	5908.39	0.18832	0.0595277	0.0131386	5655.75	0.156465	0.0509108	0.00797824	7969.44	0.631596	0.117673	4.62479e-07	8860.74	0.903089	0.155273	3.14756e-08	Conserved TNF	Conserved diff
ENSG00000162999	DUSP19	78.6405	0.123277	0.232134	0.79196	93.4858	-0.603866	0.21395	0.0163747	131.246	-0.147426	0.158992	0.494693	91.0534	-1.56948	0.216372	2.89733e-12	Gran-specific TNF	TPA-specific
ENSG00000163002	NUP35	1008.53	-0.031354	0.0776335	0.842422	424.336	-0.0526916	0.098364	0.744101	678.498	-1.11723	0.195833	7.35467e-08	599.701	-1.71001	0.229327	6.62243e-13	NA	Conserved diff
ENSG00000272800	AC021851.1	73.5922	-0.0599213	0.242399	0.907981	19.5242	-0.239765	0.522798	0.784422	50.2596	-1.61938	0.281791	5.82864e-08	46.4411	-2.06712	0.334328	3.54904e-09	NA	Conserved diff
ENSG00000283839	AC096667.1	92.8342	0.120823	0.21085	0.774095	128.33	-0.710182	0.173728	0.000228207	260.625	0.196285	0.158411	0.338276	191.504	-0.748836	0.188206	0.000229859	Gran-specific TNF	TPA-specific
ENSG00000170396	ZNF804A	483.396	0.0201553	0.10314	0.928701	527.831	-0.551156	0.090891	1.23371e-08	727.298	0.65848	0.196306	0.00257536	849.467	1.03608	0.225741	1.72649e-05	Gran-specific TNF	Conserved diff
ENSG00000065548	ZC3H15	4702.51	0.109639	0.0605115	0.235708	2538.66	0.00144864	0.0578886	0.98899	8699.43	-0.789497	0.187838	0.000109595	8813.09	-0.695529	0.214418	0.0031793	NA	Conserved diff
ENSG00000138448	ITGAV	50.7032	0.194044	0.279901	0.723796	108.1	-7.17667e-05	0.183631	0.999782	691.476	1.10532	0.132775	1.02985e-15	866.594	1.58558	0.15599	3.64939e-23	NA	Conserved diff
ENSG00000115368	WDR75	4172.98	0.297482	0.0648172	7.70837e-05	1585.11	0.189546	0.0605178	0.00665237	4546.45	-1.20466	0.127237	4.48545e-20	4596.84	-1.09789	0.149029	1.27993e-12	Conserved TNF	Conserved diff
ENSG00000138381	ASNSD1	1510.38	0.177223	0.0681449	0.0552761	719.893	-0.132581	0.0797782	0.205607	2574.99	-0.690601	0.166854	0.000142456	2504.36	-0.752843	0.190626	0.000257665	NA	Conserved diff
ENSG00000128694	OSGEPL1	243.642	-0.12196	0.134509	0.629987	207.391	-0.59943	0.1556	0.000570646	587.761	-0.30676	0.142719	0.0692121	540.012	-0.555729	0.177699	0.00458401	Gran-specific TNF	TPA-specific
ENSG00000064933	PMS1	1649.05	-0.0517314	0.0781481	0.738059	656.521	-0.480375	0.0979763	6.29078e-06	1713.34	-1.37212	0.106368	1.47059e-36	1558.61	-1.85415	0.123249	1.20788e-49	Gran-specific TNF	Conserved diff
ENSG00000204253	HNRNPCP2	147.163	0.139215	0.195131	0.714839	93.4189	0.585522	0.210589	0.0183513	922.476	-0.516666	0.234623	0.0616736	888.467	-0.61239	0.254226	0.0337	Gran-specific TNF	TPA-specific
ENSG00000198130	HIBCH	1260.43	0.051433	0.0723241	0.715823	617.871	-0.251964	0.0973129	0.0301965	1247.63	-0.904392	0.199745	2.73785e-05	1235.85	-0.897224	0.213989	9.66301e-05	Gran-specific TNF	Conserved diff
ENSG00000151689	INPP1	55.5354	-0.152226	0.268137	0.776364	194.378	0.0600936	0.1426	0.803626	204.027	1.51792	0.157331	8.28898e-21	392.155	2.70235	0.197465	3.07888e-41	NA	Conserved diff
ENSG00000189362	NEMP2	315.191	0.183552	0.121304	0.351846	280.15	0.262268	0.127061	0.0988752	516.955	-0.418996	0.164936	0.0276897	364.382	-2.016	0.17015	3.88798e-31	NA	Conserved diff
ENSG00000138386	NAB1	1135.39	0.591689	0.0741376	6.71064e-14	2144.23	1.44701	0.0614226	1.24206e-120	1648.87	0.658249	0.114411	5.61649e-08	1808.41	0.899156	0.126472	8.07295e-12	Conserved TNF	Conserved diff
ENSG00000115419	GLS	6273.2	0.0590878	0.0615613	0.605417	5422.43	0.246219	0.129229	0.134769	8865.56	-0.166396	0.0872889	0.113982	10511.2	0.344936	0.107301	0.00348225	NA	TPA-specific
ENSG00000115415	STAT1	3829.18	0.431947	0.0663356	2.34593e-09	7714.58	0.174379	0.0474151	0.00108693	23988.7	3.21076	0.12567	1.22824e-141	12403.2	2.12785	0.154616	1.0807e-41	Conserved TNF	Conserved diff
ENSG00000229023	AC067945.1	25.549	0.867896	0.433166	0.174166	77.0594	0.645159	0.224026	0.0139763	2.24191	2.51228	1.40188	0.141312	1.59634	1.95559	1.57523	0.314909	Gran-specific TNF	NA
ENSG00000173559	NABP1	5257.56	1.14666	0.0611705	6.42877e-76	8522.82	1.27559	0.0419139	4.5285e-201	4365.83	0.0149607	0.167417	0.956088	9371.43	1.75447	0.221583	1.97744e-14	Conserved TNF	TPA-specific
ENSG00000196950	SLC39A10	3632.18	0.115791	0.0631168	0.22698	1059.61	-0.0201953	0.069029	0.867159	2484.15	-1.08482	0.169838	1.27906e-09	3702.66	0.288767	0.171401	0.155386	NA	ATRA-specific
ENSG00000081320	STK17B	3129.99	-0.249764	0.0690383	0.00323223	6400.15	-0.645453	0.0456996	1.13618e-43	7616.7	0.929083	0.129654	7.06447e-12	13025.8	2.01101	0.148906	3.47524e-40	Conserved TNF	Conserved diff
ENSG00000144395	CCDC150	708.657	0.0900913	0.0962407	0.616579	275.556	0.175187	0.128188	0.317587	622.875	-0.81877	0.125769	5.86331e-10	427.451	-3.48318	0.188347	1.37715e-74	NA	Conserved diff
ENSG00000119041	GTF3C3	3164.86	0.208069	0.0575752	0.00326698	2318.91	-0.105246	0.059177	0.168916	5216.44	-0.118474	0.113226	0.432723	4793.65	-0.344118	0.13512	0.0238973	Pro-specific TNF	TPA-specific
ENSG00000197121	PGAP1	1428.01	0.0244049	0.0783448	0.882029	629.189	-0.0304938	0.0885079	0.841465	1159.12	-0.785421	0.214349	0.000879646	965.572	-1.57905	0.22843	3.15884e-11	NA	Conserved diff
ENSG00000065413	ANKRD44	1386.93	0.11249	0.0717194	0.328278	3763.05	-0.434168	0.0468614	3.75932e-19	4072.86	1.41446	0.196022	4.9821e-12	6029.78	2.16991	0.20151	6.98725e-26	Gran-specific TNF	Conserved diff
ENSG00000115524	SF3B1	14221.3	0.160233	0.053564	0.0210973	13310.7	-0.0406571	0.0388993	0.471923	36720.9	0.329043	0.100671	0.00340802	32164.1	0.00234799	0.120579	0.989637	Pro-specific TNF	ATRA-specific
ENSG00000115520	COQ10B	699.483	0.408872	0.0983103	0.000450773	1179.74	0.265848	0.0729801	0.00123018	1747.63	1.10745	0.169812	5.43906e-10	2405.82	1.76242	0.195764	2.24509e-18	Conserved TNF	Conserved diff
ENSG00000144381	HSPD1	43549.9	0.114478	0.0503878	0.108466	9191.84	0.0545015	0.0494597	0.44237	51241.3	-1.59337	0.214254	1.01077e-12	46450.6	-2.18096	0.235721	2.35537e-19	NA	Conserved diff
ENSG00000115541	HSPE1	4500.9	0.323688	0.0708256	8.36118e-05	882.599	-0.150053	0.0966832	0.243365	3326.67	-1.43786	0.285199	2.45213e-06	3143.13	-1.70317	0.299104	6.28533e-08	Pro-specific TNF	Conserved diff
ENSG00000247626	MARS2	2231.65	-0.224331	0.0632142	0.00407535	531.047	-0.332475	0.0939359	0.00176728	3101.02	-2.05902	0.130703	3.375e-54	3071.85	-2.03555	0.155706	1.03288e-37	Conserved TNF	Conserved diff
ENSG00000119042	SATB2	2331.08	-0.0206848	0.0759158	0.898807	1656.59	0.0769315	0.0590041	0.345718	2896.72	-0.263325	0.140129	0.120135	2473.46	-0.771606	0.152591	1.86102e-06	NA	TPA-specific
ENSG00000225953	SATB2-AS1	40.6536	-0.103601	0.324544	0.879082	21.1146	-0.139688	0.421919	0.847439	80.3879	-0.922681	0.185096	3.24064e-06	66.5788	-1.83492	0.263379	2.17584e-11	NA	Conserved diff
ENSG00000226124	FTCDNL1	76.8595	-0.2275	0.227642	0.585921	63.2887	-0.661742	0.249743	0.0259063	134.088	-0.378	0.218357	0.157674	167.655	0.3068	0.232618	0.282069	Gran-specific TNF	NA
ENSG00000232732	AC097717.1	102.137	-0.237176	0.210404	0.527225	25.3414	-0.388352	0.382952	0.487111	17.5028	-1.90466	0.452729	0.000107791	15.6571	-2.69888	0.56779	8.09923e-06	NA	Conserved diff
ENSG00000178074	C2orf69	1107	0.0380486	0.0809865	0.816559	640.6	-0.0143252	0.0966049	0.9366	1226.69	-0.530444	0.123496	7.45317e-05	1248.77	-0.425831	0.153399	0.0128987	NA	Conserved diff
ENSG00000162971	TYW5	738.69	0.473895	0.0954899	1.33832e-05	851.765	0.513726	0.09105	1.41122e-07	841.398	0.154786	0.155615	0.459323	766.093	-0.0730406	0.173403	0.759358	Conserved TNF	NA
ENSG00000162972	MAIP1	562.531	0.0770779	0.0946534	0.6696	342.541	-0.0389403	0.111842	0.839889	1088.72	-0.545907	0.197878	0.0156308	1062.91	-0.591864	0.217171	0.0148528	NA	Conserved diff
ENSG00000155729	KCTD18	314.322	-0.123646	0.125073	0.591142	514.065	-0.313577	0.0966856	0.0047154	1082.82	0.415824	0.102711	0.00020504	1078.94	0.436854	0.139497	0.00452273	Gran-specific TNF	Conserved diff
ENSG00000163535	SGO2	2574.99	0.0136448	0.0723121	0.930979	1278.86	-0.423635	0.0688695	7.32033e-09	2275.26	-0.597702	0.15999	0.000675323	1705.06	-1.94626	0.176296	3.71819e-27	Gran-specific TNF	Conserved diff
ENSG00000082153	BZW1	13714.6	0.159723	0.0582333	0.0397045	9626.31	0.355586	0.04041	2.43265e-17	17632.6	0.102945	0.14589	0.61784	18341.5	0.242658	0.179185	0.267336	Conserved TNF	NA
ENSG00000013441	CLK1	2130.65	0.146732	0.0656405	0.116196	2758.91	-0.0516154	0.0583623	0.555487	6588.71	0.669932	0.143395	1.4291e-05	6277.13	0.583513	0.167225	0.00140478	NA	Conserved diff
ENSG00000240344	PPIL3	833.19	0.0301305	0.0900138	0.872	416.707	-0.61601	0.102341	1.61408e-08	2271.43	-0.6489	0.188978	0.00197627	2153.07	-0.810326	0.194907	0.000111899	Gran-specific TNF	Conserved diff
ENSG00000196290	NIF3L1	986.479	0.0626638	0.0799766	0.681617	452.392	-0.421439	0.10359	0.000246891	1772.03	-0.615128	0.14969	0.000160772	1693.3	-0.741717	0.178275	0.000110524	Gran-specific TNF	Conserved diff
ENSG00000115942	ORC2	2199.21	-0.00473	0.071354	0.977658	1614.57	-0.346197	0.0644016	5.86875e-07	2983.93	-0.255683	0.0958687	0.0199686	2502.5	-0.836161	0.117681	8.31305e-12	Gran-specific TNF	Conserved diff
ENSG00000155744	FAM126B	3013.39	0.519247	0.0785016	1.21714e-09	2435.18	0.396612	0.0642471	6.40397e-09	3149.32	-0.00617494	0.165413	0.982365	3109.84	-0.00406534	0.175058	0.987833	Conserved TNF	NA
ENSG00000225695	HNRNPA1P35	30.0462	-0.07153	0.364306	0.92833	21.3797	-0.105181	0.446496	0.894551	95.2739	-0.708113	0.29172	0.0365627	68.7745	-2.52319	0.361923	2.10624e-11	NA	Conserved diff
ENSG00000003402	CFLAR	4563.34	1.21717	0.0662355	5.93022e-73	10191	1.26224	0.0468839	2.12054e-157	7839.72	1.22715	0.159545	1.5199e-13	7299.35	1.10601	0.168677	3.36944e-10	Conserved TNF	Conserved diff
ENSG00000238829	RNU7-45P	25.196	1.22522	0.40613	0.0196962	53.2401	0.859355	0.262434	0.00426773	2.70674	2.32002	1.0665	0.0654247	1.72922	1.56532	1.27883	0.322385	Conserved TNF	NA
ENSG00000003400	CASP10	775.412	0.21239	0.0848851	0.0682531	975.802	-0.120437	0.0761888	0.232833	1800.62	0.543645	0.140215	0.000398863	1481.73	0.0688743	0.152193	0.740639	NA	ATRA-specific
ENSG00000064012	CASP8	2268.6	0.00493502	0.0665104	0.974131	3055.01	0.0204665	0.0489492	0.804924	4630.5	0.319648	0.0860258	0.000729127	5582.17	0.802011	0.109892	2.10651e-12	NA	Conserved diff
ENSG00000155749	ALS2CR12	56.5768	-0.297143	0.274565	0.547007	59.5252	0.208866	0.250989	0.58341	45.0696	0.329131	0.263256	0.333317	113.335	2.25081	0.292757	1.16108e-13	NA	TPA-specific
ENSG00000115993	TRAK2	1685.59	0.0418639	0.071152	0.767798	1740.5	0.277659	0.056645	6.32654e-06	1792.5	0.411699	0.164477	0.0304059	3718.78	1.96246	0.179103	9.19088e-27	Gran-specific TNF	Conserved diff
ENSG00000082146	STRADB	397.677	-0.161655	0.114158	0.393638	201.202	-0.280789	0.152748	0.152156	950.745	-0.851961	0.147614	5.06451e-08	1138.63	-0.179107	0.161027	0.374008	NA	ATRA-specific
ENSG00000213090	AC007256.1	68.9079	-0.122494	0.256068	0.812178	79.4908	0.248014	0.228209	0.450091	7.2702	0.600385	0.54761	0.407179	12.3303	1.732	0.522736	0.00253623	NA	TPA-specific
ENSG00000155755	TMEM237	705.879	0.103545	0.107619	0.603857	336.224	0.164332	0.112624	0.279527	1108.84	-0.710471	0.155501	2.28001e-05	833.062	-2.15577	0.174921	1.29673e-33	NA	Conserved diff
ENSG00000082126	MPP4	33.0201	0.124034	0.367535	0.871255	13.2763	0.865697	0.572931	0.25869	10.6928	-0.799788	0.465154	0.161035	21.6752	1.16098	0.433288	0.0168267	NA	TPA-specific
ENSG00000003393	ALS2	5880.74	-0.215223	0.0542311	0.000933806	2092.72	-0.0930894	0.0555448	0.201044	8822.09	-1.23771	0.15439	1.22568e-14	15964	0.687545	0.148007	1.33721e-05	Pro-specific TNF	Opposite diff
ENSG00000138395	CDK15	28.8179	0.0543067	0.391706	0.94969	10.5873	-1.36921	0.668589	0.102116	87.6089	-1.76822	0.251491	1.80991e-11	867.246	3.57668	0.170788	1.97107e-95	NA	Opposite diff
ENSG00000155760	FZD7	273.803	-0.0882383	0.137792	0.747309	246.773	1.49871	0.133609	9.36621e-28	1080.87	-0.209697	0.123354	0.166704	3116.78	2.15208	0.15742	3.73275e-41	Gran-specific TNF	TPA-specific
ENSG00000055044	NOP58	6412.25	0.133527	0.0558404	0.0860387	2170.41	0.0760638	0.0558575	0.319627	8777.45	-1.11403	0.165906	1.53454e-10	8390.25	-1.27297	0.192556	2.36372e-10	NA	Conserved diff
ENSG00000212534	SNORD70	67.5077	0.223224	0.264319	0.655903	19.9792	-1.18414	0.503467	0.0531337	1.79935	-1.75679	1.18739	0.240146	1.3499	-3.77782	1.51602	0.0274405	NA	TPA-specific
ENSG00000271852	SNORD11B	34.5814	-0.125958	0.348855	0.861888	10.2984	0.586579	0.590528	0.498138	1.60853	-3.20981	1.36471	0.0438158	1.70553	-2.46547	1.43047	0.145043	NA	ATRA-specific
ENSG00000238317	SNORD11	84.6627	0.0737883	0.22201	0.872961	27.9434	-0.179374	0.41143	0.796198	10.7113	-1.4028	0.572944	0.0347644	10.7647	-1.2486	0.597278	0.069967	NA	ATRA-specific
ENSG00000204217	BMPR2	569.901	-0.149241	0.0950657	0.327822	1955.75	-0.0583576	0.0661619	0.556563	1988.17	1.39379	0.217793	1.18412e-09	2294.17	1.6974	0.217464	4.72417e-14	NA	Conserved diff
ENSG00000138439	FAM117B	1054.61	-0.3349	0.0897071	0.00216948	150.617	-2.06733	0.187289	6.65608e-27	998.485	-1.3868	0.136459	5.44183e-23	943.167	-1.63476	0.160947	3.92867e-23	Conserved TNF	Conserved diff
ENSG00000163596	ICA1L	217.041	0.175991	0.172723	0.577508	155.702	0.271074	0.171839	0.233983	272.667	-0.157685	0.145099	0.411993	183.754	-1.75251	0.192275	8.21962e-19	NA	TPA-specific
ENSG00000138442	WDR12	4308.2	0.0736988	0.0592202	0.473245	1086.83	-0.424572	0.0740859	8.62523e-08	5125.81	-1.3827	0.133666	8.56282e-24	5187.48	-1.26146	0.147393	1.06243e-16	Gran-specific TNF	Conserved diff
ENSG00000138380	CARF	253.283	-0.094626	0.151854	0.754326	607.407	-0.642229	0.0851347	6.10647e-13	1105.11	0.596186	0.204672	0.0101128	792.332	-0.27514	0.223451	0.319249	Gran-specific TNF	ATRA-specific
ENSG00000144426	NBEAL1	963.713	-0.0758985	0.0953444	0.676421	1564.84	0.335704	0.063046	7.64847e-07	770.97	0.717885	0.592075	0.350856	801.74	0.841434	0.577913	0.228274	Gran-specific TNF	NA
ENSG00000138443	ABI2	2084.94	0.0134488	0.0664661	0.925798	1974.31	0.503236	0.0571157	2.2039e-17	3293.68	-0.470726	0.123448	0.000507825	3952.03	0.126896	0.120625	0.404043	Gran-specific TNF	ATRA-specific
ENSG00000173166	RAPH1	28.5237	0.0689853	0.363358	0.930683	25.1531	2.51199	0.474332	8.88692e-07	10.5097	-1.09148	0.47471	0.0494875	705.025	6.59793	0.253577	6.26342e-147	Gran-specific TNF	Opposite diff
ENSG00000114933	INO80D	4468.06	0.273554	0.0681881	0.000790942	3977.17	0.344705	0.0502098	7.53126e-11	3108.58	0.286891	0.253391	0.389738	2798.44	0.0382178	0.262667	0.920796	Conserved TNF	NA
ENSG00000227946	AC007383.2	61.2316	-0.371365	0.251804	0.367736	49.1541	-0.411459	0.270994	0.256191	125.403	-0.515419	0.211186	0.0354451	102.02	-1.33044	0.244631	2.56335e-07	NA	Conserved diff
ENSG00000023228	NDUFS1	5074.05	0.0589842	0.0582434	0.580232	3187.77	-0.205673	0.0514128	0.000322649	6317.95	-0.108164	0.113733	0.482334	6488.17	0.00671906	0.141092	0.974829	Gran-specific TNF	NA
ENSG00000114942	EEF1B2	17268.4	0.030969	0.0591643	0.794743	9385.59	0.0161433	0.0504079	0.852993	60948.4	-0.776325	0.268038	0.0106055	48610.2	-1.85342	0.28865	8.05317e-10	NA	Conserved diff
ENSG00000118246	FASTKD2	2193.93	0.0541625	0.0621106	0.64465	1394.49	0.0520178	0.0649767	0.600868	2575.42	-0.616355	0.123235	2.99007e-06	2497.7	-0.685642	0.156291	4.24776e-05	NA	Conserved diff
ENSG00000118263	KLF7	684.521	0.0755016	0.0937119	0.672522	2126.21	0.631744	0.0608874	7.62116e-24	2802.6	1.04237	0.237944	5.19244e-05	2618.23	0.924132	0.239118	0.000356838	Gran-specific TNF	Conserved diff
ENSG00000237892	KLF7-IT1	38.7218	-0.00841547	0.344607	0.992137	138.02	0.602598	0.194709	0.00747106	13.7051	1.37684	0.463122	0.00848589	12.9296	1.30288	0.478769	0.0150162	Gran-specific TNF	Conserved diff
ENSG00000223725	AC009226.1	23.7379	1.18697	0.422886	0.0338739	40.1504	1.12452	0.31769	0.00176585	7.20928	-0.655686	0.547277	0.357552	15.7559	1.40121	0.40575	0.00158842	Conserved TNF	TPA-specific
ENSG00000118260	CREB1	3130.18	0.693147	0.0590977	9.33901e-30	4524.35	0.861536	0.0480647	5.30392e-70	4259.72	0.625171	0.135134	1.76069e-05	4192.25	0.617847	0.145323	7.56841e-05	Conserved TNF	Conserved diff
ENSG00000144401	METTL21A	1223.46	0.191051	0.0773482	0.0730756	540.567	0.179109	0.0998709	0.164719	1766.47	-0.97844	0.167637	3.49439e-08	1700.56	-1.09481	0.193694	7.94448e-08	NA	Conserved diff
ENSG00000163249	CCNYL1	837.465	0.0919372	0.0912123	0.582507	897.572	0.85077	0.0772561	8.82043e-27	1068.16	0.155962	0.110431	0.265806	1116.56	0.307628	0.139897	0.0551088	Gran-specific TNF	NA
ENSG00000163251	FZD5	294.349	-0.192262	0.122603	0.32841	180.069	0.477515	0.14675	0.00455901	269.918	-0.691219	0.141776	5.48686e-06	287.587	-0.420449	0.150768	0.0124464	Gran-specific TNF	Conserved diff
ENSG00000178385	PLEKHM3	493.892	0.0712642	0.114761	0.755189	427.461	-0.0394614	0.100347	0.817455	853.277	0.311331	0.252482	0.341081	1428.79	1.48724	0.256209	3.35554e-08	NA	TPA-specific
ENSG00000138413	IDH1	1771.74	-0.405622	0.0688286	9.96898e-08	2571.72	-0.390293	0.0511146	3.08066e-13	7616.42	0.813826	0.183255	3.99887e-05	7443.69	0.787876	0.201422	0.00029834	Conserved TNF	Conserved diff
ENSG00000115020	PIKFYVE	4923.22	-0.00986363	0.0636468	0.943985	5281.11	-0.359537	0.0499078	7.21674e-12	9867.02	0.495846	0.217792	0.0521903	9073.36	0.317972	0.219943	0.231986	Gran-specific TNF	NA
ENSG00000144407	PTH2R	24.1676	-0.585774	0.424769	0.409771	153.463	-0.660584	0.163785	0.000283784	345.287	0.67779	0.1122	1.06218e-08	321.374	0.535586	0.13922	0.000381575	Gran-specific TNF	Conserved diff
ENSG00000144406	UNC80	35.738	-0.58734	0.338669	0.262666	50.8969	-1.69689	0.300527	1.38146e-07	165.171	0.393073	0.164264	0.0397212	95.8936	-1.44922	0.225694	8.04496e-10	Gran-specific TNF	Opposite diff
ENSG00000197713	RPE	4081.98	0.0782452	0.0592309	0.435393	3394.34	-0.283191	0.0569179	4.42872e-06	4688.13	-0.226311	0.116097	0.104817	3672.13	-1.08741	0.127253	1.18806e-16	Gran-specific TNF	TPA-specific
ENSG00000144445	KANSL1L	899.048	0.171329	0.083946	0.163799	711.328	-0.397905	0.0818596	7.68456e-06	1564.6	-0.514535	0.190925	0.0185313	1484.43	-0.654838	0.223129	0.00819153	Gran-specific TNF	Conserved diff
ENSG00000272807	AC007038.2	274.53	-0.0155207	0.147715	0.96316	319.963	-0.433439	0.11947	0.00129706	120.021	-0.138194	0.310769	0.768079	90.6189	-1.10547	0.439883	0.0260166	Gran-specific TNF	TPA-specific
ENSG00000229127	AC007038.1	434.666	-0.0727495	0.126744	0.773523	603.522	-0.518743	0.10649	7.31851e-06	281.547	0.0443125	0.39256	0.944136	213.252	-0.828683	0.66019	0.308881	Gran-specific TNF	NA
ENSG00000115365	LANCL1	2170.19	-0.0257166	0.0656271	0.847055	1151.96	-0.466396	0.0722231	1.10583e-09	4047.08	-0.500428	0.141733	0.00141501	3186.01	-1.46967	0.148547	5.38468e-22	Gran-specific TNF	Conserved diff
ENSG00000021826	CPS1	277.934	0.000617289	0.126966	0.998331	335.576	-0.231449	0.118488	0.123305	566.925	0.209447	0.154427	0.288289	370.738	-1.21852	0.175563	2.6057e-11	NA	TPA-specific
ENSG00000030419	IKZF2	2318.85	-0.159695	0.0710389	0.113355	289.436	-1.18719	0.121065	2.23501e-21	3944.59	-2.57404	0.242549	5.40043e-25	3673.58	-3.28355	0.236723	2.4394e-42	Gran-specific TNF	Conserved diff
ENSG00000270659	AC079610.2	28.8232	-0.0340073	0.409133	0.970939	3.33617	-0.0116426	1.03481	0.994973	67.7223	-3.27295	0.351124	1.74317e-19	65.0175	-3.7993	0.409336	1.80258e-19	NA	Conserved diff
ENSG00000138376	BARD1	1755.75	-0.0409663	0.0760249	0.788846	1501	-0.263706	0.0686432	0.000593252	1991.77	-0.188805	0.167863	0.393329	1371.97	-1.6884	0.172172	1.26406e-21	Gran-specific TNF	TPA-specific
ENSG00000229267	AC016708.1	23.163	0.0399336	0.401932	0.9659	15.2489	-0.279303	0.488881	0.724096	17.9081	-0.163946	0.375465	0.772791	11.9393	-1.76862	0.536211	0.00266546	NA	TPA-specific
ENSG00000138363	ATIC	6028.06	-0.0589045	0.0534526	0.538888	2008	-0.0978811	0.0563254	0.181269	8664.47	-1.2598	0.179171	1.80592e-11	8762.92	-1.15101	0.209918	2.01555e-07	NA	Conserved diff
ENSG00000079246	XRCC5	15081.5	0.119079	0.0532515	0.11604	10425.9	-0.109573	0.0394558	0.0185213	22740.1	-0.230723	0.155639	0.238998	21298.8	-0.404877	0.185516	0.0571469	Gran-specific TNF	NA
ENSG00000279348	AC012513.3	253.765	0.0886083	0.135083	0.740824	265.724	-0.380626	0.122184	0.00700478	183.677	1.14462	0.307624	0.000715109	135.342	0.487204	0.322543	0.208866	Gran-specific TNF	ATRA-specific
ENSG00000260804	LINC01963	265.974	0.0528256	0.132968	0.845158	284.643	-0.306927	0.135442	0.0645992	361.042	1.02843	0.151139	8.41077e-11	255.62	0.238884	0.169749	0.246424	NA	ATRA-specific
ENSG00000138375	SMARCAL1	779.319	-0.162063	0.0845141	0.199104	802.953	-0.436993	0.0756884	6.77045e-08	1824.87	0.150759	0.140983	0.420888	1667.28	-0.0716063	0.178749	0.771235	Gran-specific TNF	NA
ENSG00000197756	RPL37A	26245	-0.213391	0.083251	0.0601744	19899.9	0.280808	0.0523631	6.27143e-07	79599.5	-0.617494	0.323111	0.112933	69226.4	-1.14838	0.340908	0.00211351	Gran-specific TNF	TPA-specific
ENSG00000180871	CXCR2	228.077	-0.943369	0.149437	8.12932e-09	678.497	-1.76857	0.0885602	8.7535e-87	1265.59	1.97987	0.104381	2.74518e-78	497.876	-0.0476951	0.187568	0.859327	Conserved TNF	ATRA-specific
ENSG00000163466	ARPC2	13499.3	0.0266559	0.0515568	0.797263	19336.5	0.198246	0.0408155	7.81491e-06	44202.3	0.562698	0.157387	0.00120982	50962.3	0.917926	0.191643	6.82381e-06	Gran-specific TNF	Conserved diff
ENSG00000261338	AC021016.2	56.7237	0.0546395	0.275196	0.927641	168.606	0.237294	0.150564	0.234448	178.105	1.37034	0.211099	6.6068e-10	265.385	2.13845	0.222774	9.26832e-21	NA	Conserved diff
ENSG00000127837	AAMP	3113.56	-0.0306125	0.060635	0.801573	1263.27	0.108983	0.0641819	0.19386	7190.03	-0.742903	0.194557	0.000497959	8007.37	-0.322956	0.232534	0.25339	NA	ATRA-specific
ENSG00000127838	PNKD	2392.67	0.541358	0.0715635	1.6104e-12	1793.06	1.76737	0.0620852	6.17781e-176	5850.17	-0.551708	0.143993	0.000474218	5639.58	-0.641659	0.190924	0.00216631	Conserved TNF	Conserved diff
ENSG00000135926	TMBIM1	45.7745	-0.0705189	0.294338	0.910777	88.4526	0.682786	0.209312	0.00444379	438.361	1.01684	0.174069	3.39708e-08	1494.49	3.23818	0.192578	8.23243e-62	Gran-specific TNF	Conserved diff
ENSG00000144580	CNOT9	5505.33	0.271074	0.0554397	1.91019e-05	3417.11	0.507975	0.051752	2.04363e-21	6226.72	-0.311312	0.104144	0.00809709	6724.31	-0.0376221	0.137902	0.847835	Conserved TNF	ATRA-specific
ENSG00000273466	AC012510.1	140.015	0.0875874	0.186317	0.816545	107.568	0.948244	0.1909	4.60349e-06	11.6706	-0.463025	0.537976	0.531098	9.39617	-1.3271	0.643839	0.0745658	Gran-specific TNF	NA
ENSG00000115568	ZNF142	2459.19	-0.107247	0.0728868	0.368817	2163.83	0.825777	0.0678427	1.40284e-32	3020.14	0.298301	0.22621	0.30406	2318.62	-0.443034	0.232457	0.102731	Gran-specific TNF	NA
ENSG00000074582	BCS1L	1558.91	0.0319841	0.0751382	0.833659	621.754	0.325262	0.0866297	0.000820641	3103.25	-1.00908	0.133145	3.53019e-13	2620.76	-1.84065	0.162739	1.8415e-28	Gran-specific TNF	Conserved diff
ENSG00000163481	RNF25	339.896	0.0560929	0.115508	0.809137	400.099	0.62927	0.102969	9.2856e-09	1076.74	0.283284	0.211254	0.29462	1273.42	0.723538	0.235063	0.00532811	Gran-specific TNF	TPA-specific
ENSG00000135912	TTLL4	1750.77	0.032799	0.0706489	0.818904	7482.58	0.988691	0.0438025	8.86871e-111	8530.01	2.81126	0.174145	7.01347e-57	2389.85	0.352684	0.189426	0.112082	Gran-specific TNF	ATRA-specific
ENSG00000135929	CYP27A1	21.509	-0.223428	0.443565	0.801849	186.284	0.751371	0.158405	1.33734e-05	185.098	3.8753	0.20969	2.35653e-74	67.7829	2.25665	0.269943	5.62878e-16	Gran-specific TNF	Conserved diff
ENSG00000272644	AC097468.3	49.3821	0.104121	0.293326	0.863597	41.0446	-0.756549	0.307498	0.0413159	59.1007	0.550548	0.328671	0.174069	34.0622	-1.21209	0.387891	0.00461754	Gran-specific TNF	TPA-specific
ENSG00000187736	NHEJ1	28.1988	0.537148	0.387158	0.405485	85.0213	-1.22631	0.221411	2.46815e-07	19.1109	1.61384	0.397027	0.000192457	11.8292	0.649211	0.475923	0.263302	Gran-specific TNF	ATRA-specific
ENSG00000115649	CNPPD1	1203.45	-0.164633	0.0778165	0.144458	1312.76	-0.164406	0.0673594	0.043316	4567.26	0.339988	0.140639	0.0374422	3920.71	-0.0469665	0.193686	0.866103	Gran-specific TNF	ATRA-specific
ENSG00000144567	RETREG2	1745.51	-0.378486	0.0666483	3.34876e-07	1367.21	-0.658106	0.0644897	4.29942e-23	5449.51	0.0149442	0.12563	0.940917	6742.59	0.60161	0.170272	0.00120662	Conserved TNF	TPA-specific
ENSG00000198925	ATG9A	494.774	-0.18471	0.105219	0.255325	1601.59	-1.05353	0.0629775	4.68348e-61	4258.88	1.48971	0.0938023	4.56355e-55	4147.45	1.46148	0.158201	2.67511e-19	Gran-specific TNF	Conserved diff
ENSG00000163516	ANKZF1	1014.5	-0.206483	0.0841463	0.0754796	847.032	-0.953053	0.0809402	1.58673e-30	4924.44	-0.0669762	0.11233	0.680932	4073.04	-0.651136	0.134277	5.13491e-06	Gran-specific TNF	TPA-specific
ENSG00000163521	GLB1L	39.7287	-0.148468	0.310512	0.812178	51.5387	0.175171	0.273099	0.686184	146.554	1.32253	0.154963	1.81173e-16	122.528	0.97521	0.181183	3.46513e-07	NA	Conserved diff
ENSG00000127824	TUBA4A	1056.49	-0.442531	0.0811436	1.13639e-06	2031.23	-0.864212	0.0619794	1.40595e-42	5689.56	1.53139	0.223733	6.41987e-11	3666.76	0.61837	0.253245	0.0311063	Conserved TNF	Conserved diff
ENSG00000135924	DNAJB2	97.1002	-0.292999	0.21741	0.423189	704.934	0.508121	0.0811082	3.66171e-09	1462.49	2.53957	0.197202	1.92761e-36	3955.99	4.14063	0.224288	2.49696e-74	Gran-specific TNF	Conserved diff
ENSG00000123992	DNPEP	2171.49	-0.0471381	0.0637591	0.702842	1394.56	0.220404	0.0659215	0.00341926	4489.49	-0.427688	0.124831	0.00202643	4049.81	-0.75746	0.166861	2.16835e-05	Gran-specific TNF	Conserved diff
ENSG00000072195	SPEG	132.079	-0.906026	0.202175	0.000121004	8.68253	-0.365871	0.679728	0.742352	433.513	-4.00497	0.19277	8.12183e-94	418.525	-4.71978	0.219262	8.71418e-101	Pro-specific TNF	Conserved diff
ENSG00000123989	CHPF	112.955	-0.223106	0.196371	0.522881	468.023	-0.753771	0.102014	1.91302e-12	578.066	1.17742	0.156352	5.04247e-13	364.138	0.105478	0.207731	0.707216	Gran-specific TNF	ATRA-specific
ENSG00000124006	OBSL1	36.2504	-0.635828	0.3362	0.208042	89.9806	-0.417185	0.205753	0.106277	340.84	0.979568	0.159875	6.35487e-09	151.655	-1.57905	0.206864	1.76435e-13	NA	Opposite diff
ENSG00000144589	STK11IP	1181.36	-0.132274	0.0796004	0.289865	3823.85	-0.338419	0.0537179	2.95192e-09	9260.69	2.15223	0.113162	1.05082e-78	4097.77	0.524523	0.141277	0.000631341	Gran-specific TNF	Conserved diff
ENSG00000267034	AC010980.2	89.4767	1.73598	0.237796	1.11986e-11	173.224	5.60263	0.328471	1.86486e-63	119.424	-2.55325	0.303345	4.80828e-16	119.237	-2.46876	0.303689	3.68806e-15	Conserved TNF	Conserved diff
ENSG00000237732	AC010980.1	51.299	0.810998	0.282087	0.0287046	37.7151	4.91715	0.578587	3.22802e-16	184.795	-2.52114	0.218969	2.82968e-29	170.149	-3.42728	0.280141	3.88495e-33	Conserved TNF	Conserved diff
ENSG00000261428	AC097461.1	310.027	0.235066	0.124974	0.211357	119.218	0.252771	0.184295	0.315647	191.503	-1.64909	0.224812	2.11859e-12	171.433	-2.34096	0.242026	4.59705e-21	NA	Conserved diff
ENSG00000116120	FARSB	5961.73	0.0937538	0.0568475	0.29495	1406.28	0.0169924	0.0623179	0.876981	5688.48	-1.75765	0.170882	1.56645e-23	5410.02	-2.01862	0.203835	4.89993e-22	NA	Conserved diff
ENSG00000123983	ACSL3	2970.4	0.0627478	0.0615292	0.577228	1396.3	-0.165285	0.0702622	0.0530856	9948.91	1.15333	0.161911	9.52216e-12	7330.64	0.490414	0.164092	0.00698137	NA	Conserved diff
ENSG00000085449	WDFY1	1017.88	-0.0151707	0.079342	0.930132	1432.64	0.0914978	0.0667219	0.315749	2556.02	0.636222	0.109676	4.28634e-08	2919.8	0.966678	0.137193	1.25927e-11	NA	Conserved diff
ENSG00000135900	MRPL44	1209.02	-0.0402744	0.0798706	0.801779	792.536	-0.210187	0.0777787	0.0225916	2333.9	-0.419432	0.220491	0.114855	2420.52	-0.264221	0.243822	0.388423	Gran-specific TNF	NA
ENSG00000135919	SERPINE2	1053.77	-0.131959	0.0771008	0.271531	518.639	-0.208752	0.0950638	0.0754225	2017.54	-0.796772	0.245148	0.00361253	1350.32	-3.90791	0.228054	3.68129e-64	NA	Conserved diff
ENSG00000036257	CUL3	4180.27	0.0927977	0.0610162	0.348229	3337.67	-0.133944	0.0541038	0.0398426	4848.78	0.308289	0.125007	0.0332764	5461.27	0.634471	0.157171	0.000182751	Gran-specific TNF	Conserved diff
ENSG00000135905	DOCK10	811.996	1.01913	0.0874895	2.36671e-29	8325.46	-0.484105	0.0441386	1.4335e-26	5281.49	3.43635	0.160867	3.72605e-99	20735.2	5.52469	0.171887	6.0186e-224	Opposite TNF	Conserved diff
ENSG00000169047	IRS1	110.667	-0.254864	0.195838	0.444711	21.403	0.41956	0.417994	0.49229	194.528	-1.68972	0.327378	1.34392e-06	781.903	2.11475	0.259259	2.95483e-15	NA	Opposite diff
ENSG00000144468	RHBDD1	1121.44	0.0635881	0.0826367	0.688842	1222.33	-0.351605	0.0667642	1.03401e-06	1559.57	0.547594	0.136581	0.00023878	1528.13	0.528891	0.166365	0.0038966	Gran-specific TNF	Conserved diff
ENSG00000168958	MFF	2460.83	0.00676561	0.0633501	0.962314	1664.59	-0.245971	0.0599972	0.000217559	4306.01	-0.563374	0.179238	0.00506497	4238.74	-0.578866	0.195505	0.0075823	Gran-specific TNF	Conserved diff
ENSG00000173744	AGFG1	3319.21	0.148675	0.0574275	0.0568605	3597.63	0.374972	0.048946	2.55064e-13	4564.85	0.314667	0.121193	0.0240136	5232.41	0.682061	0.150251	2.16835e-05	Gran-specific TNF	Conserved diff
ENSG00000115009	CCL20	405.144	4.32286	0.177683	5.40611e-128	4705.82	4.19417	0.0632122	0	812.621	4.37799	0.2495	4.39408e-67	642.782	4.03841	0.251247	1.48917e-56	Conserved TNF	Conserved diff
ENSG00000153827	TRIP12	11362.8	0.0951912	0.051288	0.21955	16315.4	0.00753128	0.0404682	0.919492	20533.2	0.969929	0.159284	7.95561e-09	19616.3	0.898203	0.17038	6.19803e-07	NA	Conserved diff
ENSG00000153832	FBXO36	81.4909	0.24124	0.240986	0.585547	36.6246	0.0421937	0.317886	0.942632	82.8184	-0.950986	0.199166	8.86269e-06	108.68	0.0193929	0.192029	0.944859	NA	ATRA-specific
ENSG00000163053	SLC16A14	131.496	-0.69384	0.179766	0.00139456	11.9376	-1.20745	0.574798	0.0918724	174.722	-3.27209	0.248843	5.86339e-38	297.528	-0.14721	0.159339	0.469869	Pro-specific TNF	ATRA-specific
ENSG00000225963	AC009950.1	35.836	-0.449098	0.343569	0.442037	26.6643	-1.85783	0.432259	9.62404e-05	245.22	1.44629	0.208922	3.80037e-11	223.274	1.2879	0.220905	2.90265e-08	Gran-specific TNF	Conserved diff
ENSG00000135899	SP110	721.488	-0.42521	0.0874588	2.17442e-05	1750.83	-0.713636	0.0668144	3.1064e-25	4554.87	1.4659	0.159846	6.92646e-19	2654.68	0.285174	0.175315	0.172086	Conserved TNF	ATRA-specific
ENSG00000079263	SP140	361.953	-0.0790187	0.119377	0.738059	659.691	-0.14675	0.0817225	0.164028	1149.02	0.216879	0.165496	0.307403	2028.84	1.51843	0.151056	1.12779e-22	NA	TPA-specific
ENSG00000185404	SP140L	547.517	-0.231882	0.101521	0.106132	1328.69	-0.190907	0.0659506	0.0134226	2440.8	1.05989	0.100908	1.65675e-24	1962.56	0.596732	0.109104	2.17111e-07	Gran-specific TNF	Conserved diff
ENSG00000067066	SP100	2051.87	-0.0154375	0.073177	0.922589	4187.14	-0.321441	0.0495069	8.82618e-10	6424.75	1.6976	0.134486	4.89335e-35	5905.37	1.56109	0.14356	2.25362e-26	Gran-specific TNF	Conserved diff
ENSG00000243650	RN7SL834P	44.2134	0.395928	0.305886	0.447592	109.685	-0.230721	0.184596	0.36994	41.1617	2.12063	0.415343	1.78229e-06	32.2451	1.71351	0.491126	0.00140686	NA	Conserved diff
ENSG00000135932	CAB39	4766.05	0.0532862	0.0556092	0.606039	4302.87	0.157586	0.0480597	0.00421117	10069.1	0.0222456	0.127092	0.912235	18400	1.44782	0.163693	9.01208e-18	Gran-specific TNF	TPA-specific
ENSG00000135916	ITM2C	3634.9	-0.354107	0.0649412	1.14047e-06	1923.98	-0.0616167	0.0600353	0.480873	14985.5	-1.08613	0.1415	1.71007e-13	17099.8	-0.517445	0.17819	0.00896104	Pro-specific TNF	Conserved diff
ENSG00000173692	PSMD1	4768.2	0.118645	0.0618692	0.199104	3786.59	0.21787	0.0468946	2.09886e-05	5373.1	0.239346	0.125722	0.11456	8626.75	1.34675	0.156466	7.03365e-17	Gran-specific TNF	TPA-specific
ENSG00000135931	ARMC9	208.694	-0.210829	0.144615	0.37451	77.1793	0.805674	0.220686	0.00119537	215.922	-1.50515	0.15693	1.41866e-20	344.85	0.246598	0.158486	0.193992	Gran-specific TNF	ATRA-specific
ENSG00000237039	AC018738.1	23.1814	0.244254	0.446566	0.785705	19.9917	0.599442	0.427955	0.303443	209.168	-0.479627	0.368252	0.310817	182.912	-0.956653	0.3901	0.0302854	NA	TPA-specific
ENSG00000156966	B3GNT7	1454.91	-0.42436	0.0816565	4.28865e-06	1043.07	-0.186971	0.0820629	0.0628166	1516.02	-0.315507	0.134158	0.0438375	855.803	-5.06439	0.212789	4.65546e-123	Pro-specific TNF	Conserved diff
ENSG00000115053	NCL	56604.5	0.0133467	0.0485035	0.897381	13244.3	-0.0987256	0.0469422	0.0914226	86667.4	-1.31364	0.173651	3.91203e-13	80989.6	-1.61804	0.208934	7.57975e-14	NA	Conserved diff
ENSG00000207280	SNORD20	109.787	-0.177687	0.23628	0.697063	27.6366	0.237226	0.358337	0.675703	15.639	-1.33601	0.475995	0.0136572	13.6693	-2.08297	0.553847	0.00052822	NA	Conserved diff
ENSG00000283491	AC017104.5	22.5861	-0.445006	0.435616	0.576424	8.76257	-1.73131	0.723409	0.0483385	21.6237	-0.916583	0.441134	0.0806841	18.4413	-1.57909	0.635729	0.0280003	Gran-specific TNF	TPA-specific
ENSG00000181798	LINC00471	32.5584	-0.00740812	0.354904	0.993081	11.0419	-0.37701	0.597426	0.690767	31.6204	-0.91676	0.279649	0.00330271	26.078	-1.83659	0.372973	3.57967e-06	NA	Conserved diff
ENSG00000187514	PTMA	73253.7	-0.0302128	0.0550381	0.78481	29012.2	0.165046	0.0475431	0.00223251	116758	-0.962285	0.187625	1.58581e-06	107188	-1.30344	0.222172	2.34281e-08	Gran-specific TNF	Conserved diff
ENSG00000144524	COPS7B	1875.1	0.0277014	0.0683905	0.841804	1140.78	0.0123613	0.0713884	0.925614	4165.36	-0.421676	0.130372	0.00379968	4103.93	-0.431809	0.158706	0.0150351	NA	Conserved diff
ENSG00000144535	DIS3L2	1389.67	0.0613112	0.0744003	0.664785	1123.43	0.0764949	0.0682527	0.433049	1376.92	-0.0793805	0.101145	0.573126	1219.09	-0.423675	0.143874	0.00795133	NA	TPA-specific
ENSG00000221944	TIGD1	390.169	0.0242141	0.121446	0.927399	258.03	-0.163247	0.140484	0.411857	400.778	-0.911078	0.165275	2.13639e-07	351.021	-1.48299	0.181524	2.66614e-15	NA	Conserved diff
ENSG00000135930	EIF4E2	2609.15	0.0547936	0.0622537	0.641188	2512.24	0.015593	0.0537875	0.868177	4303.57	0.312994	0.203512	0.218781	5364.28	0.869045	0.226322	0.000392406	NA	TPA-specific
ENSG00000204120	GIGYF2	4897.67	0.0459622	0.0564761	0.6696	5016.78	-0.301448	0.048614	5.42393e-09	7260.4	0.548163	0.161015	0.00217995	7479.68	0.650511	0.183711	0.00117423	Gran-specific TNF	Conserved diff
ENSG00000168918	INPP5D	4542.09	-0.326902	0.0629305	4.332e-06	7592.75	-0.38937	0.0551806	2.01858e-11	15720.2	0.674099	0.118853	8.85548e-08	24055.3	1.59578	0.154694	7.91716e-24	Conserved TNF	Conserved diff
ENSG00000085978	ATG16L1	1478.44	-0.0263296	0.0685988	0.851046	1351.59	-0.0336651	0.0639736	0.748758	2265.94	0.384795	0.100802	0.000499851	3707.99	1.49603	0.122158	3.34076e-33	NA	Conserved diff
ENSG00000252010	SCARNA5	233.04	-0.148065	0.151578	0.595828	267.119	0.683881	0.140506	7.45386e-06	4.58844	0.132611	0.787632	0.915599	5.88159	0.7918	0.833441	0.456499	Gran-specific TNF	NA
ENSG00000251791	SCARNA6	101.308	-0.179084	0.216905	0.664509	78.5072	0.583399	0.230926	0.0352153	13.3187	0.124771	0.531098	0.882661	18.1725	0.924915	0.55267	0.158434	Gran-specific TNF	NA
ENSG00000130561	SAG	48.2065	-0.428192	0.308244	0.404981	16.4193	0.0496254	0.468295	0.954329	142.686	-1.0958	0.319699	0.00201683	104.86	-3.49025	0.379221	3.65999e-19	NA	Conserved diff
ENSG00000077044	DGKD	2391.98	-0.187829	0.065369	0.0288232	1387.83	-0.288877	0.0640924	3.91151e-05	5601.88	-0.251987	0.0946006	0.0201508	6760.91	0.320866	0.115057	0.0124455	Conserved TNF	Opposite diff
ENSG00000085982	USP40	750.986	-0.0455327	0.0872812	0.795576	1116.69	-0.262177	0.0674551	0.00050152	2151.16	0.632958	0.099122	1.293e-09	1752.39	0.14384	0.121249	0.339219	Gran-specific TNF	ATRA-specific
ENSG00000123485	HJURP	2223.89	-0.167463	0.0663565	0.065336	1276.33	-0.223123	0.0635461	0.00194594	3301.61	-0.249664	0.145597	0.162374	2038.04	-2.73619	0.170387	1.88628e-56	Gran-specific TNF	TPA-specific
ENSG00000188042	ARL4C	127.356	-0.772562	0.194879	0.000947376	7.91155	1.27645	0.720988	0.171395	608.836	-4.79147	0.213639	2.94396e-109	6119.31	3.25454	0.165984	9.52405e-84	Pro-specific TNF	Opposite diff
ENSG00000227252	AC105760.2	27.1475	-0.657122	0.387138	0.276696	15.4117	-0.586548	0.514724	0.423567	23.3257	-0.516262	0.318963	0.191461	19.8714	-1.11277	0.363862	0.00566307	NA	TPA-specific
ENSG00000124831	LRRFIP1	7572.49	0.19996	0.052522	0.00167523	7581.75	0.449752	0.0453917	8.30004e-22	12802.6	0.194467	0.141691	0.281748	15153.5	0.651519	0.161845	0.000190926	Conserved TNF	TPA-specific
ENSG00000177483	RBM44	144.273	0.266659	0.202781	0.438357	101.271	0.157136	0.199239	0.607885	202.403	-0.429113	0.155401	0.0155232	184.363	-0.711339	0.192306	0.000664216	NA	Conserved diff
ENSG00000184182	UBE2F	233.09	-0.287676	0.142056	0.168203	662.362	-0.532819	0.0885702	1.64652e-08	954.861	1.01481	0.200925	2.34369e-06	4292.22	3.67089	0.213066	7.55724e-65	Gran-specific TNF	Conserved diff
ENSG00000132330	SCLY	732.447	0.0633668	0.0957373	0.738059	255.924	-0.491823	0.125413	0.000438127	293.116	-1.12925	0.245807	2.03957e-05	280.521	-1.26729	0.319013	0.000235681	Gran-specific TNF	Conserved diff
ENSG00000178752	ERFE	25.3676	-0.188821	0.400316	0.815844	4.05603	-0.00309612	0.976411	0.998783	87.9083	-1.7647	0.213172	1.5054e-15	80.3125	-2.34127	0.256962	8.45502e-19	NA	Conserved diff
ENSG00000132323	ILKAP	1406.72	0.0671101	0.0754828	0.63762	839.922	0.131127	0.0803978	0.2155	2618.31	-0.923582	0.201357	2.10634e-05	2847.99	-0.556427	0.214536	0.0211563	NA	Conserved diff
ENSG00000186235	AC016757.1	198.18	-0.595544	0.159196	0.00211118	35.7883	-1.41341	0.37033	0.000651242	447.358	-2.41112	0.145352	5.11124e-60	428.248	-2.72684	0.171931	4.40954e-55	Conserved TNF	Conserved diff
ENSG00000144485	HES6	1472.05	-0.327969	0.0935176	0.00463163	203.169	-0.950912	0.155683	9.469e-09	5624.81	-2.34758	0.220135	3.12584e-25	5397.88	-2.63435	0.245169	8.95045e-26	Conserved TNF	Conserved diff
ENSG00000204104	TRAF3IP1	500.818	-0.127049	0.102104	0.473267	264.18	-0.140625	0.135408	0.474999	629.884	-0.654018	0.152565	7.72953e-05	647.15	-0.511828	0.187529	0.0146834	NA	Conserved diff
ENSG00000065802	ASB1	905.452	-0.197719	0.083533	0.0905351	1509.88	0.287395	0.0604938	1.29119e-05	3268.76	0.267716	0.0769973	0.00170745	3394.75	0.39815	0.13428	0.00748703	Gran-specific TNF	Conserved diff
ENSG00000130414	NDUFA10	3795.33	0.0770798	0.0564229	0.41453	2571.57	0.0159187	0.0526456	0.862297	8238.59	-0.42663	0.166333	0.026035	7691.17	-0.628016	0.190012	0.00260593	NA	Conserved diff
ENSG00000144504	ANKMY1	957.291	-0.157828	0.095403	0.293029	1508.1	-0.31301	0.0660527	1.36523e-05	1736.92	0.290864	0.100328	0.0105234	1555.69	0.0247172	0.11373	0.881126	Gran-specific TNF	ATRA-specific
ENSG00000188542	DUSP28	121.055	-0.398472	0.188615	0.145287	197.536	-0.351922	0.140563	0.0372343	452.669	0.409302	0.133484	0.00642444	411.73	0.19289	0.143345	0.270833	Gran-specific TNF	ATRA-specific
ENSG00000142327	RNPEPL1	520.579	-0.264503	0.115422	0.104439	1614.52	-0.232928	0.067331	0.00232267	4574.14	1.03313	0.132473	6.68244e-14	4533.57	1.03918	0.201485	1.11563e-06	Gran-specific TNF	Conserved diff
ENSG00000260942	CAPN10-AS1	101.125	0.0775945	0.212444	0.859965	147.635	-0.183242	0.162411	0.429227	245.66	0.198597	0.196482	0.450874	174.995	-0.852007	0.269497	0.0041195	NA	TPA-specific
ENSG00000142330	CAPN10	618.098	-0.0260103	0.106106	0.909036	875.331	0.293697	0.0785988	0.000877063	2475.58	0.567024	0.126543	3.36302e-05	2124.19	0.208236	0.144972	0.235491	Gran-specific TNF	ATRA-specific
ENSG00000178623	GPR35	105.618	0.557735	0.216976	0.0591454	997.525	1.16811	0.0743365	6.21131e-54	2189.53	3.00309	0.117586	1.56433e-141	933.48	1.53077	0.172025	5.62095e-18	Gran-specific TNF	Conserved diff
ENSG00000226321	CROCC2	25.3198	-0.29568	0.400737	0.703188	26.5625	-0.662131	0.400238	0.208163	32.3716	0.7155	0.341443	0.077672	40.676	1.24055	0.320339	0.000346332	NA	TPA-specific
ENSG00000115687	PASK	1679.36	-0.0810161	0.0704988	0.516869	627.059	-0.0435079	0.0850211	0.756125	2384.16	-0.97677	0.145103	1.37103e-10	1727.86	-3.21621	0.15432	1.6034e-94	NA	Conserved diff
ENSG00000146205	ANO7	590.452	0.000943485	0.10987	0.99685	2.65799	-0.83589	1.21421	0.661903	1339.3	-6.27141	0.239862	2.6096e-148	1317.8	-6.59417	0.252294	2.98243e-148	NA	Conserved diff
ENSG00000168385	2002-09-01	11066	0.0648437	0.0544089	0.497192	10787.9	0.164967	0.0397449	0.000176893	27021.1	0.185877	0.11446	0.189744	28382.1	0.347901	0.152279	0.0453121	Gran-specific TNF	TPA-specific
ENSG00000006607	FARP2	2165.75	-0.0528107	0.0722028	0.706494	892.445	0.500178	0.0850302	3.62822e-08	1637.09	-0.728141	0.232311	0.00520582	1587.41	-0.795178	0.236224	0.00212983	Gran-specific TNF	Conserved diff
ENSG00000115694	STK25	1542	-0.0136413	0.0753832	0.934703	1531.98	0.30192	0.0619248	7.17755e-06	5440.19	-0.146166	0.130816	0.396971	5248.6	-0.220033	0.168796	0.28865	Gran-specific TNF	NA
ENSG00000176946	THAP4	1837.31	-0.113198	0.0727315	0.333136	466	0.0975763	0.0993299	0.503694	2686.41	-1.6916	0.186148	1.47161e-18	3134.58	-0.874241	0.237075	0.000691741	NA	Conserved diff
ENSG00000168397	ATG4B	1543.91	0.0242822	0.0722672	0.871408	1449.07	0.167173	0.0647874	0.0308614	5829.02	-0.208847	0.139615	0.233976	6845.55	0.283339	0.151737	0.110932	Gran-specific TNF	NA
ENSG00000168393	DTYMK	2053.62	-0.0312691	0.0709521	0.828505	783.436	0.258982	0.0795705	0.00454768	3196.58	-1.23504	0.239107	1.31709e-06	2785.97	-1.96889	0.258951	2.21521e-13	Gran-specific TNF	Conserved diff
ENSG00000168395	ING5	2030.81	-0.191111	0.0631099	0.0191051	809.652	0.143719	0.0754676	0.13499	3864.08	-1.34254	0.126847	7.26002e-25	3741.61	-1.44794	0.136943	5.51416e-25	Pro-specific TNF	Conserved diff
ENSG00000180902	D2HGDH	772.798	-0.277773	0.0964762	0.0284411	596.367	-0.349464	0.0845535	0.000190004	2677.95	-0.76004	0.159458	9.21616e-06	2347.24	-1.27834	0.192951	2.1556e-10	Conserved TNF	Conserved diff
ENSG00000233806	LINC01237	113.312	-0.223436	0.196779	0.522929	27.3504	0.617652	0.377971	0.214504	95.3122	-2.17217	0.298544	3.25287e-12	86.9052	-2.93953	0.321522	6.38399e-19	NA	Conserved diff
ENSG00000237940	LINC01238	169.447	-0.358221	0.195573	0.228062	31.1647	-0.173124	0.345321	0.762424	187.943	-2.25993	0.301756	6.85679e-13	179.785	-2.52219	0.373738	9.5397e-11	NA	Conserved diff
ENSG00000280119	AC093642.2	72.5238	-0.184551	0.249911	0.703041	5.33157	0.869394	0.903479	0.513999	49.4961	-3.49647	0.502701	3.03346e-11	49.6852	-3.18763	0.486305	3.41638e-10	NA	Conserved diff
ENSG00000220804	LINC01881	182.198	0.303942	0.174554	0.260471	208.58	0.625349	0.144055	8.02668e-05	161.946	-0.372589	0.21323	0.153205	174.517	-0.0964873	0.223143	0.752651	Gran-specific TNF	NA
ENSG00000072756	TRNT1	2353.62	0.101851	0.0641259	0.320432	1467.23	-0.0385829	0.067892	0.726155	2381.81	-0.657461	0.0971695	1.08809e-10	2327.8	-0.697711	0.119705	2.92836e-08	NA	Conserved diff
ENSG00000113851	CRBN	1007.13	0.0459619	0.0884181	0.796559	676.15	-0.431497	0.0882448	6.70027e-06	2276.6	-0.469891	0.118024	0.000266351	2608.64	-0.00431117	0.135301	0.983972	Gran-specific TNF	ATRA-specific
ENSG00000271870	AC024060.1	169.992	0.199972	0.157951	0.461749	113.423	-0.148414	0.189651	0.611368	258.5	-1.21744	0.285415	8.4451e-05	237.014	-1.61645	0.302937	4.43599e-07	NA	Conserved diff
ENSG00000144455	SUMF1	439.255	-0.0120791	0.106858	0.959109	809.171	-0.247751	0.0772798	0.00529653	973.761	0.954876	0.166356	6.05801e-08	1251.27	1.49521	0.203959	1.65911e-12	Gran-specific TNF	Conserved diff
ENSG00000170364	SETMAR	524.466	0.0402056	0.0964975	0.836122	233.249	0.172085	0.147031	0.408272	671.377	-0.870192	0.170481	1.79488e-06	583.874	-1.47158	0.189993	7.51067e-14	NA	Conserved diff
ENSG00000150995	ITPR1	4922.51	-0.00757811	0.0634048	0.956432	8968.46	0.761625	0.0468083	8.70585e-58	8950.59	0.724629	0.251614	0.0111114	8315.98	0.583472	0.247855	0.038494	Gran-specific TNF	Conserved diff
ENSG00000134107	BHLHE40	403.158	-0.511721	0.109153	4.90059e-05	1044.47	1.21113	0.0767326	2.09694e-54	1395.6	0.425238	0.170184	0.0307228	8119.9	3.67851	0.167092	2.18746e-105	Opposite TNF	Conserved diff
ENSG00000134108	ARL8B	3047.51	0.232478	0.0628868	0.00246921	3161.1	0.197732	0.0548771	0.00141586	7809.28	0.317071	0.132894	0.040385	10704.8	1.08096	0.167464	6.49771e-10	Conserved TNF	Conserved diff
ENSG00000134109	EDEM1	3779.92	0.0368031	0.0598464	0.758047	4878.32	0.288693	0.04627	4.28119e-09	10440.8	0.517216	0.122014	9.44922e-05	17870.1	1.6846	0.136723	1.34418e-33	Gran-specific TNF	Conserved diff
ENSG00000189229	AC069277.1	276.482	0.33508	0.135665	0.0730756	235.268	-0.321626	0.138898	0.0578192	197.48	-0.374537	0.183601	0.0872014	126.416	-2.7683	0.240222	1.65859e-29	NA	TPA-specific
ENSG00000125046	SSUH2	40.5297	0.152517	0.360332	0.833975	10.3307	0.283404	0.693524	0.809829	11.8213	-2.23861	0.627444	0.00124212	17.7176	-0.273893	0.486516	0.675166	NA	ATRA-specific
ENSG00000180914	OXTR	145.977	-0.181247	0.173109	0.564817	42.1832	-0.253863	0.294595	0.567675	94.5532	-1.72122	0.206683	1.00506e-15	124.603	-0.432002	0.206875	0.0703177	NA	ATRA-specific
ENSG00000070950	RAD18	3016.08	0.167283	0.0603635	0.0369872	1194.2	-0.0125117	0.0656268	0.91707	2792.83	-1.129	0.132621	2.17106e-16	2974.62	-0.806873	0.134996	1.22846e-08	Pro-specific TNF	Conserved diff
ENSG00000196220	SRGAP3	112.126	-0.995078	0.196692	8.42778e-06	160.897	-2.33412	0.194394	1.01794e-31	35.8849	-1.17074	0.336206	0.00167541	45.7787	-0.210999	0.317804	0.615679	Conserved TNF	ATRA-specific
ENSG00000206573	THUMPD3-AS1	1187.39	0.695169	0.076517	5.84666e-18	1227.09	0.499004	0.0763562	6.7228e-10	1220.09	0.104175	0.129232	0.561062	1100.71	-0.157423	0.202225	0.550474	Conserved TNF	NA
ENSG00000134077	THUMPD3	1655.08	-0.0696255	0.070325	0.590204	1460.44	-0.290716	0.0609429	1.17792e-05	2820.98	0.167453	0.102059	0.184461	2422.19	-0.242565	0.126343	0.0999227	Gran-specific TNF	NA
ENSG00000168137	SETD5	5420.87	0.285224	0.0636492	0.000121004	4936.18	0.505156	0.0503558	2.44064e-22	8184.12	0.147545	0.204319	0.608318	7907.74	0.0900924	0.209177	0.753629	Conserved TNF	NA
ENSG00000163719	MTMR14	2425.89	0.173151	0.0672592	0.058738	4094.35	0.91158	0.0536429	5.44435e-63	6462.07	0.781761	0.12081	7.5408e-10	6528.9	0.832052	0.161284	1.10856e-06	Gran-specific TNF	Conserved diff
ENSG00000156983	BRPF1	2243.69	-0.11299	0.0689259	0.299015	2249.14	0.24929	0.0643843	0.000529974	4843.82	0.214308	0.122249	0.151618	7665.57	1.30028	0.168474	9.25844e-14	Gran-specific TNF	TPA-specific
ENSG00000114026	OGG1	857.058	-0.424233	0.0830764	6.75635e-06	1064.34	-0.222781	0.0681867	0.00437003	2421.37	0.570867	0.105048	3.24727e-07	2981.05	1.06866	0.19271	1.43628e-07	Conserved TNF	Conserved diff
ENSG00000134072	CAMK1	571.692	-0.306121	0.09688	0.0132781	4060.3	-0.237163	0.0491484	9.10949e-06	1409.38	2.81947	0.139083	2.42887e-89	3615.02	4.31552	0.185464	1.18651e-117	Conserved TNF	Conserved diff
ENSG00000171148	TADA3	1198.88	-0.238723	0.0736972	0.0105948	2091.78	-0.594212	0.0580873	3.36093e-23	7405.67	0.580591	0.233594	0.0317132	5529.71	-0.17825	0.264203	0.609599	Conserved TNF	ATRA-specific
ENSG00000241553	ARPC4	4142.74	-0.0960109	0.0603516	0.319626	7384.76	0.0484944	0.0481663	0.490779	12749.8	0.914604	0.244567	0.000666059	13466.2	1.05684	0.270051	0.000296164	NA	Conserved diff
ENSG00000214021	TTLL3	441.728	0.00955821	0.110769	0.970284	1582.84	-0.15949	0.0672692	0.0509476	2377.37	1.36042	0.254938	5.44867e-07	2279.56	1.3046	0.323741	0.000187859	NA	Conserved diff
ENSG00000156990	RPUSD3	1469.83	-0.175177	0.0780582	0.114241	725.333	-0.491272	0.0796337	6.56239e-09	2842.93	-0.832936	0.18633	3.52321e-05	2616.17	-1.14177	0.217602	7.04832e-07	Gran-specific TNF	Conserved diff
ENSG00000163701	IL17RE	40.6473	-0.802925	0.325309	0.0732788	71.0762	-0.763038	0.243986	0.00674741	428.013	0.511754	0.143323	0.00122938	421.62	0.502767	0.164865	0.00581629	Gran-specific TNF	Conserved diff
ENSG00000163703	CRELD1	260.414	-0.218198	0.131045	0.288418	322.44	-0.265451	0.110539	0.0474292	953.636	0.362617	0.111912	0.00373029	937.486	0.34936	0.14758	0.0373025	Gran-specific TNF	Conserved diff
ENSG00000269894	AC018809.1	26.933	-0.284318	0.382362	0.700807	23.4338	0.287201	0.410424	0.655388	28.1802	-0.461334	0.279312	0.181205	23.8993	-1.05137	0.361208	0.00878212	NA	TPA-specific
ENSG00000163704	PRRT3	32.8992	-0.0721741	0.35719	0.925932	49.5443	0.152703	0.293248	0.751355	149	0.911748	0.232845	0.000344105	222.222	1.74565	0.222862	3.82176e-14	NA	Conserved diff
ENSG00000230082	PRRT3-AS1	27.4384	-1.09235	0.401469	0.041956	36.4123	-0.173487	0.311568	0.732115	23.4309	-0.195971	0.347875	0.699206	25.5538	0.1059	0.40045	0.85294	Pro-specific TNF	NA
ENSG00000269982	AC018809.2	37.1077	-0.54368	0.336829	0.309218	47.5637	-0.640539	0.285994	0.0686849	167.379	0.791275	0.17034	1.61498e-05	173.996	0.909672	0.190118	6.98531e-06	NA	Conserved diff
ENSG00000125037	EMC3	1403.32	0.0319537	0.0800619	0.844354	1251.68	0.0988244	0.0640871	0.246861	3185.52	0.180068	0.192015	0.489242	3873.05	0.698476	0.227435	0.00544435	NA	TPA-specific
ENSG00000180385	EMC3-AS1	806.095	0.0499031	0.0993143	0.802356	474.294	0.0995939	0.10083	0.501137	686.983	-0.691855	0.267065	0.0243815	555.301	-1.61138	0.262231	4.47296e-09	NA	Conserved diff
ENSG00000186162	CIDECP	196.857	0.0251879	0.147548	0.939313	308.613	-0.037496	0.12129	0.858929	612.879	0.661801	0.162143	0.000180026	636.379	0.775058	0.193392	0.000204853	NA	Conserved diff
ENSG00000144554	FANCD2	4270.95	0.0779206	0.058321	0.42902	2136.5	0.18728	0.0541401	0.00232413	5000.53	-0.413948	0.109688	0.000587381	3472.44	-2.11321	0.115983	2.01781e-72	Gran-specific TNF	Conserved diff
ENSG00000254999	BRK1	2172.42	0.0406139	0.0720064	0.77746	2562.8	0.165818	0.0565665	0.0120734	11283.8	0.183716	0.198763	0.49625	12001.2	0.375594	0.229763	0.169722	Gran-specific TNF	NA
ENSG00000134086	VHL	1909.91	0.159821	0.0642283	0.0704226	1655.99	0.292443	0.0611447	1.11262e-05	4875.55	0.0641881	0.106954	0.678877	5830.6	0.563246	0.131169	6.31617e-05	Gran-specific TNF	TPA-specific
ENSG00000134070	IRAK2	29.4366	2.77548	0.446748	1.48309e-08	75.4126	3.85205	0.32806	2.33192e-30	89.193	2.51757	0.231762	3.79641e-26	343.698	4.65954	0.239325	1.39893e-82	Conserved TNF	Conserved diff
ENSG00000157014	TATDN2	1319.48	0.140873	0.074528	0.208186	957.577	0.069565	0.074857	0.530679	2727.86	0.0733802	0.161952	0.763081	3507.39	0.73931	0.190683	0.000340178	NA	TPA-specific
ENSG00000231177	LINC00852	247.424	0.3689	0.166003	0.11915	212.543	0.220675	0.136175	0.218966	77.6808	0.361624	0.232147	0.212001	93.2829	0.832132	0.224728	0.000654771	NA	TPA-specific
ENSG00000157017	GHRL	73.3136	1.33881	0.258711	4.78618e-06	1241.79	0.36854	0.0652138	1.34532e-07	3381.36	5.42118	0.152814	8.41282e-273	2064.54	4.70289	0.18433	2.67778e-141	Conserved TNF	Conserved diff
ENSG00000240288	GHRLOS	314.322	0.42156	0.143809	0.0247796	308.051	0.476946	0.122225	0.000472705	294.268	3.06605	0.162491	1.76134e-77	193.508	2.39537	0.234806	2.52737e-23	Conserved TNF	Conserved diff
ENSG00000157020	SEC13	3624.41	0.0272129	0.0644681	0.834386	1886.67	0.140781	0.0590851	0.0495278	6987.93	-0.244512	0.178987	0.284233	7976.96	0.175487	0.211201	0.520682	Gran-specific TNF	NA
ENSG00000196639	HRH1	46.8537	-0.395571	0.291869	0.419663	56.2554	-0.810882	0.273647	0.0110094	231.735	0.918831	0.188453	5.48259e-06	334.422	1.68817	0.189017	4.20994e-18	Gran-specific TNF	Conserved diff
ENSG00000197548	ATG7	2586.1	0.606971	0.0662707	3.01944e-18	4380.49	0.923756	0.0485076	5.82336e-79	3027.82	0.735383	0.114572	1.05267e-09	3347.41	0.986824	0.162652	7.17433e-09	Conserved TNF	Conserved diff
ENSG00000144560	VGLL4	992.192	-0.285051	0.0854658	0.00798744	861.805	-0.30947	0.0744864	0.000174082	1208.25	0.290274	0.187826	0.216236	2172.29	1.60802	0.196081	2.07103e-15	Conserved TNF	TPA-specific
ENSG00000144559	TAMM41	973.638	-0.0777779	0.0837823	0.619233	499.005	-0.14083	0.0934488	0.260024	895.488	-1.21915	0.1826	1.97428e-10	875.1	-1.27607	0.198648	7.91085e-10	NA	Conserved diff
[truncated: 9,671 more rows]

## Sheet: ST2
Supplementary table 2. RT-qPCR and RNA-seq log2 fold change estimates of three genes following TNF-alpha treatment. TNF-alpha treatment of promyelocytes and granulocytes was repeated, and analysed for differential expression of TNF, CDK1, and VCAM1 with RT-qPCR. The reference genes used were GAPDH and COX4I1. Cell type indicates the differentiation status of cells treated with TNF-alpha. VCAM1 fa…
Cell type	Gene	log2FC	lo95	hi95	lo99	hi99	SE	method
promyelocyte	CDK1	0.393448	0.465366	0.321531	0.487932	0.298965	0.107227	RT-qPCR
promyelocyte	CDK1	0.21949	0.0812466	0.357734	0.0378691	0.401112	0.0705325	RNA-seq
granulocyte	CDK1	-1.1732	-0.936102	-1.41029	-0.861708	-1.48468	0.22026	RT-qPCR
granulocyte	CDK1	-0.200818	-0.346025	-0.0556106	-0.391587	-0.0100481	0.0740853	RNA-seq
promyelocyte	TNF	1.93567	2.06088	1.81046	2.10017	1.77118	0.0960935	RT-qPCR
promyelocyte	TNF	1.91318	1.7672	2.05917	1.72139	2.10498	0.0744828	RNA-seq
granulocyte	TNF	2.87625	3.1166	2.63589	3.19202	2.56047	0.219638	RT-qPCR
granulocyte	TNF	2.50754	2.32638	2.6887	2.26953	2.74555	0.0924303	RNA-seq
promyelocyte	VCAM1	VCAM1 transcripts only detected in TNF treated samples, consistent with RNA-seq						RT-qPCR
promyelocyte	VCAM1	9.74374	7.73173	11.7557	7.10041	12.3871	1.02653	RNA-seq
granulocyte	VCAM1	VCAM1 transcripts only detected in TNF treated samples, consistent with RNA-seq						RT-qPCR
granulocyte	VCAM1	8.95193	8.21159	9.69227	7.97928	9.92457	0.377726	RNA-seq

## Sheet: ST3
Supplementary table 3. Gene set enrichment analysis (GSEA) analysis. Significantly enriched or depleted hallmark gene sets (False discovery rate (FDR)<0.05) in promyelocytes and granulocytes stimulated with TNF. NES; normalized enrichment score. P.adjust; FDR adjusted P value. Condition; gene set enriched in promyelocytes or granulocytes treated with TNF
ID	NES	p.adjust	condition
HALLMARK_P53_PATHWAY	1.81262	0.00573197	Pro
HALLMARK_TNFA_SIGNALING_VIA_NFKB	2.7058	0.00573197	Pro
HALLMARK_IL2_STAT5_SIGNALING	1.95517	0.00573197	Pro
HALLMARK_INTERFERON_GAMMA_RESPONSE	2.427	0.00573197	Pro
HALLMARK_COMPLEMENT	1.85482	0.00573197	Pro
HALLMARK_ALLOGRAFT_REJECTION	2.33478	0.00573197	Pro
HALLMARK_APOPTOSIS	2.24171	0.00573197	Pro
HALLMARK_UV_RESPONSE_UP	1.96328	0.00573197	Pro
HALLMARK_INFLAMMATORY_RESPONSE	2.63465	0.00573197	Pro
HALLMARK_APICAL_JUNCTION	1.9336	0.00573197	Pro
HALLMARK_KRAS_SIGNALING_UP	2.04571	0.00573197	Pro
HALLMARK_EPITHELIAL_MESENCHYMAL_TRANSITION	1.94621	0.00573197	Pro
HALLMARK_IL6_JAK_STAT3_SIGNALING	2.15519	0.00573197	Pro
HALLMARK_COAGULATION	1.86815	0.0109051	Pro
HALLMARK_KRAS_SIGNALING_DN	1.73472	0.0356234	Pro
HALLMARK_NOTCH_SIGNALING	1.72193	0.0362769	Pro
HALLMARK_INTERFERON_ALPHA_RESPONSE	1.61285	0.0409635	Pro
HALLMARK_WNT_BETA_CATENIN_SIGNALING	-1.63296	0.0423012	Pro
HALLMARK_P53_PATHWAY	1.82627	0.00442635	Gran
HALLMARK_INTERFERON_GAMMA_RESPONSE	2.07212	0.00442635	Gran
HALLMARK_TNFA_SIGNALING_VIA_NFKB	2.83949	0.00442635	Gran
HALLMARK_IL2_STAT5_SIGNALING	2.05189	0.00442635	Gran
HALLMARK_ALLOGRAFT_REJECTION	2.05017	0.00442635	Gran
HALLMARK_INFLAMMATORY_RESPONSE	2.68335	0.00442635	Gran
HALLMARK_COMPLEMENT	1.86774	0.00442635	Gran
HALLMARK_APICAL_JUNCTION	1.68654	0.00442635	Gran
HALLMARK_KRAS_SIGNALING_UP	2.0804	0.00442635	Gran
HALLMARK_APOPTOSIS	2.19109	0.00442635	Gran
HALLMARK_XENOBIOTIC_METABOLISM	1.77052	0.00442635	Gran
HALLMARK_UV_RESPONSE_UP	1.98613	0.00442635	Gran
HALLMARK_EPITHELIAL_MESENCHYMAL_TRANSITION	1.95519	0.00442635	Gran
HALLMARK_COAGULATION	1.79764	0.00442635	Gran
HALLMARK_KRAS_SIGNALING_DN	1.70957	0.00442635	Gran
HALLMARK_IL6_JAK_STAT3_SIGNALING	2.14998	0.00442635	Gran
HALLMARK_HYPOXIA	1.52123	0.0115039	Gran
HALLMARK_ADIPOGENESIS	1.50496	0.0142086	Gran
HALLMARK_INTERFERON_ALPHA_RESPONSE	1.53561	0.0249946	Gran
HALLMARK_ESTROGEN_RESPONSE_LATE	1.46732	0.0293351	Gran
HALLMARK_ESTROGEN_RESPONSE_EARLY	1.42812	0.0463822	Gran

## Sheet: ST4
Supplementary table 4. Hallmark gene sets enriched (FDR adjusted p value <0.05) in the conserved response to TNF between promyelocytes and granulocytes. GeneRatio; Number of target genes in the category and number of target genes analyzed. BgRatio; Number of total genes in the category and number of genes in the database. P.adjust; FDR adjusted p-value.
ID	GeneRatio	BgRatio	p.adjust
HALLMARK_TNFA_SIGNALING_VIA_NFKB	96/491	200/4386	1.14e-39
HALLMARK_INFLAMMATORY_RESPONSE	60/491	200/4386	2.34e-12
HALLMARK_INTERFERON_GAMMA_RESPONSE	53/491	200/4386	9.06e-09
HALLMARK_IL6_JAK_STAT3_SIGNALING	28/491	87/4386	1.22e-06
HALLMARK_ALLOGRAFT_REJECTION	46/491	200/4386	8.22e-06
HALLMARK_APOPTOSIS	39/491	161/4386	1.25e-05
HALLMARK_P53_PATHWAY	41/491	200/4386	0.000456
HALLMARK_IL2_STAT5_SIGNALING	38/491	200/4386	0.00375
HALLMARK_MTORC1_SIGNALING	34/491	200/4386	0.042

## Sheet: ST5
Supplementary table 5. Kyoto Encyclopedia of Genes and Genomes (KEGG) pathways enriched (FDR adjusted p value <0.05) in the conserved response to TNF between promyelocytes and granulocytes. GeneRatio; Number of target genes in the category and number of target genes analyzed. BgRatio; Number of total genes in the category and number of genes in the database. Pvalue; enrichment significance level.…
ID	Description	GeneRatio	BgRatio	pvalue	p.adjust
hsa04064	NF-kappa B signaling pathway	34/626	95/7440	6.02e-14	1.83e-11
hsa04621	NOD-like receptor signaling pathway	44/626	168/7440	3.54e-12	5.38e-10
hsa04668	TNF signaling pathway	32/626	110/7440	1.82e-10	1.84e-08
hsa05161	Hepatitis B	36/626	144/7440	1.4e-09	1.06e-07
hsa04620	Toll-like receptor signaling pathway	29/626	104/7440	3.9e-09	2.37e-07
hsa05168	Herpes simplex infection	41/626	185/7440	4.87e-09	2.47e-07
hsa04380	Osteoclast differentiation	32/626	128/7440	1.17e-08	5.07e-07
hsa05163	Human cytomegalovirus infection	45/626	225/7440	2.51e-08	9.53e-07
hsa05164	Influenza A	37/626	171/7440	5.45e-08	1.84e-06
hsa05162	Measles	31/626	132/7440	9.44e-08	2.87e-06
hsa04622	RIG-I-like receptor signaling pathway	21/626	70/7440	1.43e-07	3.94e-06
hsa05140	Leishmaniasis	21/626	74/7440	4.06e-07	1.03e-05
hsa05167	Kaposi sarcoma-associated herpesvirus infection	37/626	186/7440	5.21e-07	1.22e-05
[truncated: 39 more rows]

## Sheet: ST6
Supplementary table 6. Gene Ontology (GO) terms enriched (FDR adjusted p value <0.05) in the conserved response to TNF between promyelocytes and granulocytes. Annotated; Number of total genes in the category. Significant: Number of target genes in the category. Expected; Expected number of genes in the category, based on total number of genes. Weight01Fisher; Fisher adjusted p-value using the Top…
[truncated: 33 more rows]

[truncated: 16 more sheets: ST7, ST8, ST9, ST10, ST11, ST12, ST13, ST14, ST15, ST16, ST17, ST18, ST19, ST20, ST21, ST22]
